# Supplementary material
Source: PubMed Central journal article supplement (PMC7297054)

# One-pot Parallel Synthesis of 5-(Dialkylamino)tetrazoles

Olena Savych,<sup>a,b</sup> Yuliya O. Kuchkovska,<sup>a,c</sup> Andrey V. Bogolyubsky,<sup>a</sup> Anzhelika I. Konovets,<sup>a</sup> Kateryna E. Gubina,<sup>c</sup> Sergey E. Pipko,<sup>d</sup> Anton V. Zhemera,<sup>a</sup> Alexander V. Grishchenko,<sup>a</sup> Dmytro N. Khomenko,<sup>c</sup> Volodymyr S. Brovarets,<sup>b</sup> Roman Doroschuk,<sup>c</sup> Yurii S. Moroz,<sup>c,d</sup> Oleksandr O. Grygorenko<sup>\*,a,c</sup>

<sup>a</sup> *Enamine Ltd. ([www.enamine.net](http://www.enamine.net)) Chervonotkatska Street 78, Kyiv 02094, Ukraine*

<sup>b</sup> *V. P. Kukhar Institute of Bioorganic Chemistry and Petrochemistry, National Academy of Sciences of Ukraine, Kyiv, 02094, Ukraine*

<sup>c</sup> *Taras Shevchenko National University of Kyiv, Volodymyrska Street 60, Kyiv 01601, Ukraine*

<sup>d</sup> *Chemspace, Ilukstes iela 38-5, Riga, LV-1082, Latvia*

\*Corresponding author. E-mail: [gregor@univ.kiev.ua](mailto:gregor@univ.kiev.ua).

## Table of contents.

|                                                               |      |
|---------------------------------------------------------------|------|
| 1. Library characterization data                              | S2   |
| 2. Figure S1. Structures of the reagents <b>10</b> {1–58}     | S21  |
| 3. Figure S2. Structures of the reagents <b>11</b> {1–511}    | S24  |
| 4. Figure S3. Structures of the reagents <b>15</b> {1–378}    | S56  |
| 5. Table S2. SMILES strings for the reagents <b>10</b> .      | S80  |
| 6. Table S2. SMILES strings for the reagents <b>11</b> .      | S83  |
| 7. Table S2. SMILES strings for the reagents <b>15</b> ..     | S102 |
| 8. Table S4. Parallel synthesis of 5-aminotetrazoles <b>8</b> | S116 |
| 9. Table S5. Parallel synthesis of 5-aminotetrazoles <b>9</b> | S137 |
| 10. Copies of NMR spectra                                     | S180 |

## Library characterization data

**General Methods.** The solvents were purified according to the standard procedures. All starting materials were taken at Enamine Ltd. Reverse phase column chromatography was performed using C<sub>18</sub>-modified silica gel as a stationary phase. <sup>1</sup>H, <sup>19</sup>F, and <sup>13</sup>C NMR spectra were recorded at 500 MHz, 470, and 126 MHz, respectively. Chemical shifts are reported in ppm downfield from TMS as internal standards. Mass spectra were recorded on an LC–MS instrument with chemical ionization (CI). LC–MS data were acquired on an Agilent 1200 HPLC system equipped with DAD/ELSD/LC–MS-6120 diodematrix and mass-selective detector. Melting points were measured on a MPA100 OptiMelt automated melting point system. Elemental analyses were performed at the Laboratory of Organic Analysis, Department of Chemistry, Taras Shevchenko National University of Kyiv.

### Products obtained by isothiocyanate-based method.

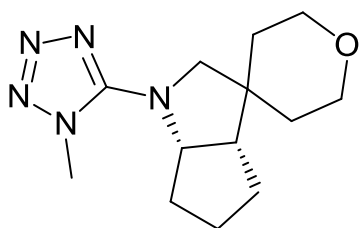

***rac*-(3*aR*,6*aR*)-1-(1-Methyl-1*H*-tetrazol-5-yl)decahydro-1*H*-spiro[cyclopenta[*b*]pyrrole-3,4'-pyran] (8{2,8}).** Beige solid, mp = 137–139 °C. <sup>1</sup>H NMR (500 MHz, DMSO-*d*<sub>6</sub>): δ 4.46 (td, *J* = 6.7, 3.1 Hz, 1H), 3.92 (s, 3H), 3.67 – 3.54 (m, 4H), 3.51 – 3.44 (m, 1H), 3.36 (d, *J* = 9.9 Hz, 1H), 2.48 – 2.41 (m, 1H), 1.98 – 1.91 (m, 1H), 1.66 – 1.60 (m, 2H), 1.60 – 1.51 (m, 2H), 1.49 – 1.33 (m, 5H) ppm. <sup>13</sup>C{<sup>1</sup>H} NMR (126 MHz, DMSO-*d*<sub>6</sub>): δ 155.6, 64.6, 63.9, 63.6, 56.8, 51.8, 41.2, 36.1, 33.6, 33.1, 31.4, 26.1, 25.5 ppm. LC–MS (*m/z*): 264 (M + H<sup>+</sup>). Anal. Calcd. for C<sub>13</sub>H<sub>21</sub>N<sub>5</sub>O: C, 59.29; H, 8.04; N, 26.59. Found: C, 59.48; H, 8.19; N, 26.67.

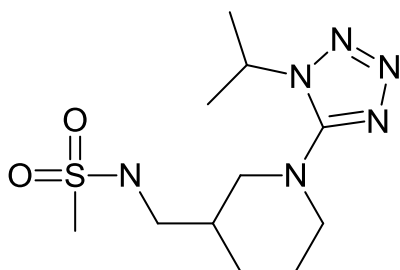

***N*-((1-(1-Isopropyl-1*H*-tetrazol-5-yl)piperidin-3-yl)methyl)methanesulfonamide (8{10,50}).** White solid, mp = 114–116 °C. <sup>1</sup>H NMR (500 MHz, DMSO-*d*<sub>6</sub>): δ 7.08 (s, 1H), 4.56 (hept, *J* = 6.5 Hz, 1H), 3.38 (dd, *J* = 12.3, 3.5 Hz, 1H), 3.28 (dt, *J* = 13.4, 3.9 Hz, 1H), 2.94 – 2.90 (m, 3H), 2.89 (s, 3H), 2.74 (dd, *J* = 12.2, 9.4 Hz, 1H), 1.94 – 1.80 (m, 1H), 1.80 – 1.70 (m, 2H), 1.68 – 1.56 (m, 1H), 1.47 (d, *J* = 6.4 Hz, 3H), 1.45 (d, *J* = 6.4 Hz, 3H), 1.26 – 1.17 (m, 1H) ppm. <sup>13</sup>C{<sup>1</sup>H} NMR (126 MHz, DMSO-*d*<sub>6</sub>): δ 158.5, 53.7, 50.9, 49.5, 45.2, 35.3, 27.1, 23.5, 22.22, 22.16 ppm. LC–MS (*m/z*): 303 (M + H<sup>+</sup>). Anal. Calcd. for C<sub>11</sub>H<sub>22</sub>N<sub>6</sub>O<sub>2</sub>S: C, 43.69; H, 7.33; N, 27.79; S, 10.60. Found: C, 43.29; H, 7.54; N, 27.85; S, 10.82.

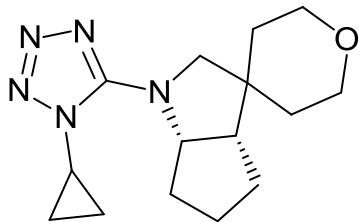

***rac*-(3aR,6aR)-1-(1-Cyclopropyl-1H-tetrazol-5-yl)decahydro-1H-spiro[cyclopenta[*b*]pyrrole-3,4'-pyran] (8{15,8})**. Yellow solid, mp = 92–95 °C. <sup>1</sup>H NMR (500 MHz, DMSO-*d*<sub>6</sub>): δ 4.53 (td, *J* = 6.8, 2.9 Hz, 1H), 3.75 (d, *J* = 10.1 Hz, 1H), 3.70 (tt, *J* = 7.1, 3.7 Hz, 1H), 3.66 – 3.52 (m, 3H), 3.51 – 3.44 (m, 1H), 3.40 (d, *J* = 10.1 Hz, 1H), 1.98 (dt, *J* = 11.4, 6.5 Hz, 1H), 1.69 – 1.55 (m, 4H), 1.54 – 1.40 (m, 5H), 1.39 – 1.29 (m, 1H), 1.25 – 1.06 (m, 3H), 1.05 – 0.96 (m, 1H) ppm. <sup>13</sup>C{<sup>1</sup>H} NMR (126 MHz, DMSO-*d*<sub>6</sub>): δ 156.2, 64.6, 64.2, 63.7, 56.6, 51.5, 41.2, 36.1, 33.2, 31.4, 27.6, 26.0, 25.5, 7.9, 7.4 ppm. LC–MS (*m/z*): 290 (M + H<sup>+</sup>). Anal. Calcd. for C<sub>15</sub>H<sub>23</sub>N<sub>5</sub>O: C, 62.26; H, 8.01; N, 24.20. Found: C, 62.12; H, 7.70; N, 23.94.

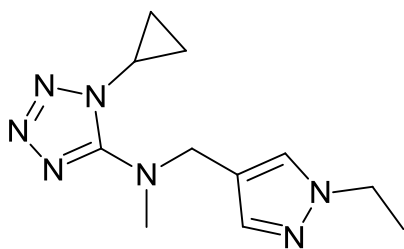

**1-Cyclopropyl-*N*-((1-ethyl-1H-pyrazol-4-yl)methyl)-*N*-methyl-1H-tetrazol-5-amine (8{15,71})**. Yellow oil. <sup>1</sup>H NMR (500 MHz, DMSO-*d*<sub>6</sub>): δ 7.72 (s, 1H), 7.40 (s, 1H), 4.46 (s, 2H), 4.08 (q, *J* = 7.2 Hz, 2H), 3.73 – 3.67 (m, 1H), 2.99 (s, 3H), 1.33 (t, *J* = 7.2 Hz, 3H), 1.21 – 1.12 (m, 4H) ppm. <sup>13</sup>C{<sup>1</sup>H} NMR (126 MHz, DMSO-*d*<sub>6</sub>): δ 158.6, 138.5, 128.8, 115.3, 46.5, 46.1, 37.1, 28.5, 15.5, 7.7 ppm. LC–MS (*m/z*): = 248 (M + H<sup>+</sup>). Anal. Calcd. for C<sub>11</sub>H<sub>17</sub>N<sub>7</sub>: C, 53.42; H, 6.93; N, 39.65. Found: C, 53.28; H, 7.11; N, 39.43.

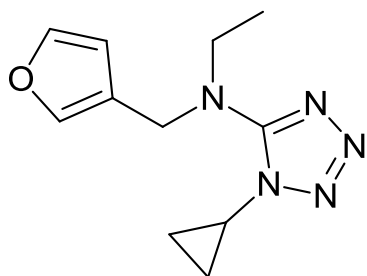

**1-Cyclopropyl-*N*-ethyl-*N*-(furan-3-ylmethyl)-1H-tetrazol-5-amine (8{15,72})**. Beige solid, mp = 60–62 °C. <sup>1</sup>H NMR (500 MHz, DMSO-*d*<sub>6</sub>): δ 7.67 (s, 1H), 7.62 (s, 1H), 6.44 (s, 1H), 4.47 (s, 2H), 3.64 (quint, *J* = 5.3 Hz, 1H), 3.43 (q, *J* = 7.1 Hz, 2H), 1.15 (d, *J* = 5.3 Hz, 4H), 1.10 (t, *J* = 7.1 Hz, 3H) ppm. <sup>13</sup>C{<sup>1</sup>H} NMR (126 MHz, DMSO-*d*<sub>6</sub>): δ 158.2, 143.7, 141.2, 121.0, 110.7, 44.0, 43.9, 28.4, 12.4, 7.4 ppm. LC–MS (*m/z*): 234 (M + H<sup>+</sup>). Anal. Calcd. for C<sub>11</sub>H<sub>15</sub>N<sub>5</sub>O: C, 56.64; H, 6.48; N, 30.02. Found: C, 56.98; H, 6.76; N, 29.86.

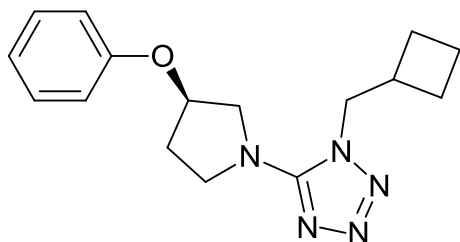

**(R)-1-(Cyclobutylmethyl)-5-(3-phenoxy pyrrolidin-1-yl)-1H-tetrazole (8{36,164}).** White solid, mp = 52–54 °C. <sup>1</sup>H NMR (500 MHz, DMSO-*d*<sub>6</sub>): δ 7.30 (t, *J* = 7.8 Hz, 2H), 6.98 – 6.94 (m, 3H), 5.16 – 5.12 (m, 1H), 4.33 (d, *J* = 2.3 Hz, 1H), 4.32 (d, *J* = 2.2 Hz, 1H), 3.88 (dd, *J* = 11.2, 4.6 Hz, 1H), 3.70 – 3.62 (m, 3H), 2.74 (hept, *J* = 7.6 Hz, 1H), 2.33 – 2.23 (m, 1H), 2.20 – 2.12 (m, 1H), 1.98 – 1.91 (m, 2H), 1.86 – 1.73 (m, 4H) ppm. <sup>13</sup>C{<sup>1</sup>H} NMR (126 MHz, DMSO-*d*<sub>6</sub>): δ 156.8, 155.7, 129.6, 121.0, 115.5, 75.7, 54.7, 51.1, 47.4, 34.5, 30.9, 25.15, 25.12, 17.6 ppm. LC-MS (*m/z*): 300 (M + H<sup>+</sup>). Anal. Calcd. for C<sub>16</sub>H<sub>21</sub>N<sub>5</sub>O: C, 64.19; H, 7.07; N, 23.39. Found: C, 64.52; H, 6.87; N, 23.42.

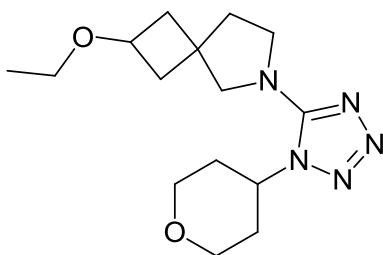

**1-(1-(1-Methylcyclopropyl)-1H-tetrazol-5-yl)-4-((methylsulfonyl)methyl)piperidine (8{40,188}).** Beige solid, mp = 66–69 °C. The compound existed as a *ca.* 3:2 mixture of rotamers. <sup>1</sup>H NMR (500 MHz, DMSO-*d*<sub>6</sub>): δ 4.68 – 4.56 (m, 1H), 4.02 – 3.91 (m, 3H), 3.57 – 3.50 (m, 4H), 3.49 (s, 2H), 3.35 – 3.30 (m, 2H), 2.29 (ddd, *J* = 9.7, 7.0, 2.8 Hz, 0.8H), 2.23 (ddd, *J* = 9.6, 6.9, 2.9 Hz, 1.2H), 2.03 – 1.85 (m, 8H), 1.09 (t, *J* = 7.0 Hz, 3H) ppm. <sup>13</sup>C{<sup>1</sup>H} NMR (126 MHz, DMSO-*d*<sub>6</sub>): δ 155.8 and 155.5, 68.1 and 67.9, 65.73 and 65.70, 62.4, 60.5 and 59.9, 53.3, 48.5 and 47.9, 38.1, 37.4, 36.8 and 36.4, 32.85 and 32.76, 15.2 ppm. LC-MS (*m/z*): 308 (M + H<sup>+</sup>). Anal. Calcd. for C<sub>15</sub>H<sub>25</sub>N<sub>5</sub>O<sub>2</sub>: C, 58.61; H, 8.20; N, 22.78. Found: C, 58.70; H, 8.00; N, 22.60.

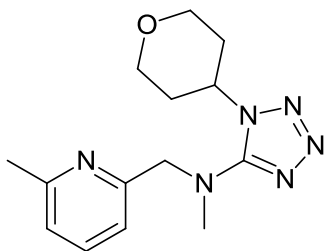

**N-Methyl-N-((6-methylpyridin-2-yl)methyl)-1-(tetrahydro-2H-pyran-4-yl)-1H-tetrazol-5-amine (8{40,192}).** Brown solid, mp = 71–74 °C. <sup>1</sup>H NMR (500 MHz, DMSO-*d*<sub>6</sub>): δ 7.68 (t, *J* = 7.7 Hz, 1H), 7.20 (d, *J* = 7.7 Hz, 1H), 7.18 (d, *J* = 7.7 Hz, 1H), 4.82 (tt, *J* = 10.4, 5.3 Hz, 1H), 4.48 (s, 2H), 3.96 (d, *J* = 11.3 Hz, 2H), 3.42 (td, *J* = 11.4, 3.5 Hz, 2H), 3.00 (s, 3H), 2.43 (s, 3H), 2.05 – 1.96 (m, 4H) ppm. <sup>13</sup>C{<sup>1</sup>H} NMR (126 MHz, DMSO-*d*<sub>6</sub>): δ 158.1, 157.7, 155.8, 137.2, 122.0, 119.2, 65.9, 58.9, 53.6, 39.6, 32.5, 24.0 ppm. LC-MS (*m/z*): 289 (M + H<sup>+</sup>). Anal. Calcd. for C<sub>14</sub>H<sub>20</sub>N<sub>6</sub>O: C, 58.31; H, 6.99; N, 29.15. Found: C, 58.48; H, 7.31; N, 29.38.



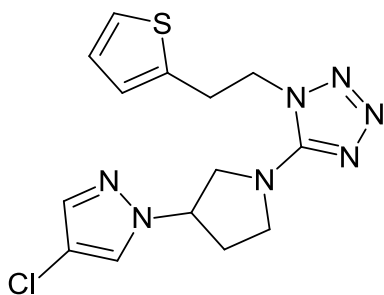

**5-(3-(4-Chloro-1H-pyrazol-1-yl)pyrrolidin-1-yl)-1-(2-(thiophen-2-yl)ethyl)-1H-tetrazole**

(**8{41,147}**). Beige solid, mp = 92–94 °C. <sup>1</sup>H NMR (500 MHz, DMSO-*d*<sub>6</sub>): δ 8.08 (s, 1H), 7.58 (s, 1H), 7.33 (d, *J* = 5.1 Hz, 1H), 6.93 (dd, *J* = 5.1, 3.4 Hz, 1H), 6.81 (d, *J* = 3.4 Hz, 1H), 5.09 – 5.01 (m, 1H), 4.54 (t, *J* = 7.0 Hz, 2H), 3.91 (dd, *J* = 10.4, 6.3 Hz, 1H), 3.77 (dd, *J* = 10.4, 3.9 Hz, 1H), 3.67 (q, *J* = 7.9 Hz, 1H), 3.60 (dt, *J* = 9.0, 4.4 Hz, 1H), 3.35 – 3.29 (m, 2H), 2.44 – 2.32 (m, 2H) ppm. <sup>13</sup>C{<sup>1</sup>H} NMR (126 MHz, DMSO-*d*<sub>6</sub>): δ 155.6, 138.8, 137.2, 127.3, 127.1, 126.1, 124.8, 108.3, 60.3, 54.1, 47.8, 47.6, 31.0, 29.0 ppm. LC–MS (*m/z*): = 350 (M + H<sup>+</sup>). Anal. Calcd. for C<sub>14</sub>H<sub>16</sub>ClN<sub>7</sub>S: C, 48.07; H, 4.61; N, 28.03; S, 9.16; Cl, 10.13. Found: C, 47.96; H, 4.57; N, 28.14; S, 8.93; Cl, 9.87.

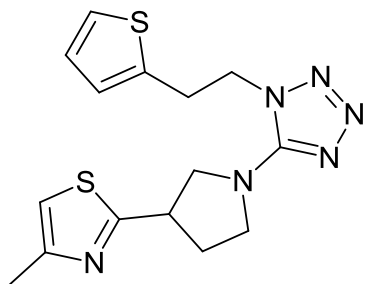

**4-Methyl-2-(1-(1-(2-(thiophen-2-yl)ethyl)-1H-tetrazol-5-yl)pyrrolidin-3-yl)thiazole** (**8{41,148}**).

Brown oil. <sup>1</sup>H NMR (500 MHz, DMSO-*d*<sub>6</sub>): δ 7.33 (d, *J* = 5.1 Hz, 1H), 7.17 (s, 1H), 6.92 (t, *J* = 5.1, 3.4 Hz, 1H), 6.81 (d, *J* = 3.4 Hz, 1H), 4.54 (t, *J* = 7.0 Hz, 2H), 3.90 – 3.82 (m, 2H), 3.69 – 3.52 (m, 3H), 3.33 (t, *J* = 6.9 Hz, 2H), 2.43 – 2.36 (m, 1H), 2.32 (s, 3H), 2.19 – 2.11 (m, 1H) ppm. <sup>13</sup>C{<sup>1</sup>H} NMR (126 MHz, DMSO-*d*<sub>6</sub>): δ 169.5, 155.7, 151.6, 138.8, 127.1, 126.2, 124.9, 113.7, 54.5, 48.5, 47.8, 41.6, 32.1, 29.0, 16.8 ppm. LC–MS (*m/z*): = 347 (M + H<sup>+</sup>). Anal. Calcd. for C<sub>15</sub>H<sub>18</sub>N<sub>6</sub>S<sub>2</sub>: C, 52.00; H, 5.24; N, 24.26; S, 18.51. Found: C, 52.17; H, 5.34; N, 24.21; S, 18.37.

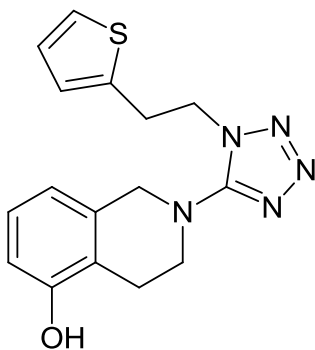

**2-(1-(2-(Thiophen-2-yl)ethyl)-1*H*-tetrazol-5-yl)-1,2,3,4-tetrahydroisoquinolin-5-ol** (**8{41,210}**). Beige solid, mp = 116–119 °C. <sup>1</sup>H NMR (500 MHz, DMSO-*d*<sub>6</sub>): δ 9.46 (s, 1H), 7.32 (dd, *J* = 5.1, 1.3 Hz, 1H), 6.98 (t, *J* = 7.8 Hz, 1H), 6.91 (t, *J* = 5.1, 3.4 Hz, 1H), 6.81 (d, *J* = 3.4 Hz, 1H), 6.67 (d, *J* = 7.9 Hz, 1H), 6.58 (d, *J* = 7.6 Hz, 1H), 4.53 (t, *J* = 6.8 Hz, 2H), 4.30 (s, 2H), 3.44 – 3.39 (m, 4H), 2.72 (t, *J* = 6.0 Hz, 2H) ppm. <sup>13</sup>C{<sup>1</sup>H} NMR (126 MHz, DMSO-*d*<sub>6</sub>): δ 158.7, 154.8, 138.9, 134.0, 127.1, 126.4, 126.1, 124.9, 120.4, 116.8, 112.4, 50.8, 48.2, 47.1, 27.8, 22.5 ppm. LC–MS (*m/z*): 328 (M + H<sup>+</sup>). Anal. Calcd. for C<sub>16</sub>H<sub>17</sub>N<sub>5</sub>OS: C, 58.70; H, 5.23; N, 21.39; S, 9.79. Found: C, 58.98; H, 5.44; N, 21.04; S, 9.56.

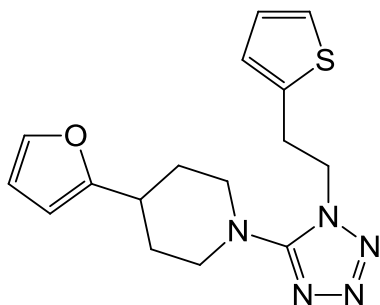

**4-(Furan-2-yl)-1-(1-(2-(thiophen-2-yl)ethyl)-1*H*-tetrazol-5-yl)piperidine** (**8{41,211}**). Yellow oil. <sup>1</sup>H NMR (500 MHz, DMSO-*d*<sub>6</sub>): δ 7.53 (s, 1H), 7.32 (d, *J* = 5.2 Hz, 1H), 6.93 – 6.88 (m, 1H), 6.78 (d, *J* = 3.4 Hz, 1H), 6.37 (s, 1H), 6.12 (d, *J* = 3.1 Hz, 1H), 4.46 (t, *J* = 6.8 Hz, 2H), 3.42 – 3.36 (m, 4H), 3.00 (t, *J* = 12.2 Hz, 2H), 2.89 – 2.82 (m, 1H), 2.02 – 1.90 (m, 2H), 1.72 – 1.62 (m, 2H) ppm. <sup>13</sup>C{<sup>1</sup>H} NMR (126 MHz, DMSO-*d*<sub>6</sub>): δ 159.0, 158.2, 141.3, 138.9, 127.0, 126.1, 124.8, 110.2, 103.7, 49.2, 48.1, 33.8, 29.6, 27.8 ppm. LC–MS (*m/z*): 330 (M + H<sup>+</sup>). Anal. Calcd. for C<sub>16</sub>H<sub>19</sub>N<sub>5</sub>OS: C, 58.34; H, 5.81; N, 21.26; S, 9.73. Found: C, 58.07; H, 5.83; N, 21.40; S, 9.64.

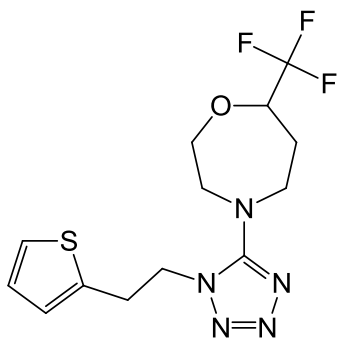

**4-(1-(2-(Thiophen-2-yl)ethyl)-1*H*-tetrazol-5-yl)-7-(trifluoromethyl)-1,4-oxazepane** (**8{41,212}**). Yellow oil. <sup>1</sup>H NMR (500 MHz, DMSO-*d*<sub>6</sub>): δ 7.34 (d, *J* = 5.1 Hz, 1H), 6.94 – 6.90 (m, 1H), 6.83 – 6.77 (m, 1H), 4.54 – 4.43 (m, 2H), 4.31 – 4.24 (m, 1H), 4.02 (d, *J* = 12.9 Hz, 1H), 3.78 – 3.71 (m, 1H), 3.58 – 3.46 (m, 4H), 3.37 (t, *J* = 6.9 Hz, 2H), 2.13 – 2.05 (m, 1H), 2.01 – 1.94 (m, 1H) ppm. <sup>13</sup>C{<sup>1</sup>H} NMR (126 MHz, DMSO-*d*<sub>6</sub>): δ 157.9, 138.9, 127.1, 126.2, 124.9, 124.8 (q, *J* = 281.1 Hz), 75.4 (q, *J* = 29.8 Hz), 68.8, 53.1, 48.4, 48.3, 28.3, 28.1 ppm. <sup>19</sup>F{<sup>1</sup>H} NMR (376 MHz, DMSO-*d*<sub>6</sub>): δ –77.6 ppm. LC–MS (*m/z*): 348 (M + H<sup>+</sup>). Anal. Calcd. for C<sub>13</sub>H<sub>16</sub>F<sub>3</sub>N<sub>5</sub>OS: C, 44.95; H, 4.64; N, 20.16; S, 9.23. Found: C, 44.92; H, 4.83; N, 19.96; S, 9.00.

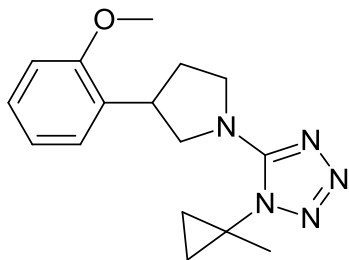

**5-(3-(2-Methoxyphenyl)pyrrolidin-1-yl)-1-(1-methylcyclopropyl)-1H-tetrazole (8{42,193})**. White solid, mp = 106–108 °C.  $^1\text{H}$  NMR (500 MHz, DMSO- $d_6$ ):  $\delta$  7.29 – 7.21 (m, 2H), 7.01 (d,  $J$  = 8.1 Hz, 1H), 6.93 (t,  $J$  = 7.5 Hz, 1H), 4.00 (dd,  $J$  = 9.5, 7.3 Hz, 1H), 3.82 (s, 3H), 3.78 – 3.65 (m, 3H), 3.54 – 3.49 (m, 1H), 2.33 – 2.24 (m, 1H), 2.11 (dq,  $J$  = 12.0, 8.6 Hz, 1H), 1.56 (s, 3H), 1.35 – 1.26 (m, 2H), 1.13 – 1.06 (m, 2H) ppm.  $^{13}\text{C}\{^1\text{H}\}$  NMR (126 MHz, DMSO- $d_6$ ):  $\delta$  157.1, 156.0, 129.0, 127.9, 126.7, 120.5, 110.9, 55.4, 54.5, 49.2, 37.3, 34.2, 30.7, 23.9, 15.1, 14.9 ppm. LC-MS ( $m/z$ ): 300 ( $\text{M} + \text{H}^+$ ). Anal. Calcd. for  $\text{C}_{16}\text{H}_{21}\text{N}_5\text{O}$ : C, 64.19; H, 7.07; N, 23.39. Found: C, 64.57; H, 7.44; N, 23.30.

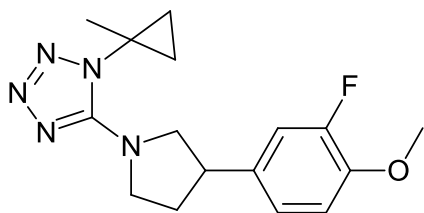

**5-(3-(3-Fluoro-4-methoxyphenyl)pyrrolidin-1-yl)-1-(1-methylcyclopropyl)-1H-tetrazole (8{42,227})**. White solid, mp = 95–97 °C.  $^1\text{H}$  NMR (500 MHz, DMSO- $d_6$ ):  $\delta$  7.24 (d,  $J$  = 13.1 Hz, 1H), 7.13 – 7.10 (m, 2H), 4.03 – 3.94 (m, 1H), 3.82 (s, 3H), 3.80 – 3.76 (m, 1H), 3.68 (td,  $J$  = 9.4, 6.9 Hz, 1H), 3.53 – 3.44 (m, 2H), 2.37 – 2.29 (m, 1H), 2.10 – 2.01 (m, 1H), 1.56 (s, 3H), 1.37 – 1.24 (m, 2H), 1.14 – 1.08 (m, 2H) ppm.  $^{13}\text{C}\{^1\text{H}\}$  NMR (126 MHz, DMSO- $d_6$ ):  $\delta$  155.9, 151.4 (d,  $J$  = 243.4 Hz), 145.8 (d,  $J$  = 10.5 Hz), 134.3 (d,  $J$  = 6.0 Hz), 123.3 (d,  $J$  = 3.2 Hz), 114.8 (d,  $J$  = 18.0 Hz), 113.9 (d,  $J$  = 2.1 Hz), 56.0, 55.8, 49.6, 42.4, 34.2, 32.4, 23.9, 15.1, 14.8 ppm.  $^{19}\text{F}$  NMR (470 MHz, DMSO- $d_6$ ):  $\delta$  –135.2 – –135.3 (m) ppm. LC-MS ( $m/z$ ): 318 ( $\text{M} + \text{H}^+$ ). Anal. Calcd. for  $\text{C}_{16}\text{H}_{20}\text{FN}_5\text{O}$ : C, 60.55; H, 6.35; N, 22.07. Found: C, 60.54; H, 6.62; N, 21.69.

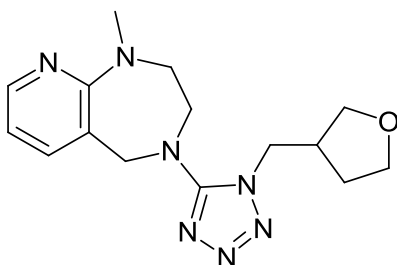

**1-Methyl-4-(1-((tetrahydrofuran-3-yl)methyl)-1H-tetrazol-5-yl)-2,3,4,5-tetrahydro-1H-pyrido[2,3-e][1,4]diazepine (8{51,251})**. Brownish oil.  $^1\text{H}$  NMR (500 MHz, DMSO- $d_6$ ):  $\delta$  8.05 (dd,  $J$  = 4.8, 1.8 Hz, 1H), 7.50 (dd,  $J$  = 7.3, 1.8 Hz, 1H), 6.71 (dd,  $J$  = 7.3, 4.8 Hz, 1H), 4.53 (s, 2H), 4.22 (d,  $J$  = 7.6 Hz, 2H), 3.73 – 3.69 (m, 3H), 3.61 (td,  $J$  = 9.1, 7.1 Hz, 2H), 3.55 – 3.51 (m, 2H), 3.37 (dd,  $J$  = 8.8, 5.4 Hz, 1H), 2.99 (s, 3H), 2.77 – 2.65 (m, 1H), 1.94 – 1.83 (m, 1H), 1.57 – 1.46 (m, 1H) ppm.  $^{13}\text{C}\{^1\text{H}\}$  NMR (126 MHz, DMSO- $d_6$ ):  $\delta$  160.2, 157.9, 146.2, 137.8, 119.9, 114.1, 70.0, 66.7, 52.5, 52.1, 51.4, 49.6,

39.6, 37.9, 29.2 ppm. LC-MS ( $m/z$ ): 316 ( $M + H^+$ ). Anal. Calcd. for  $C_{15}H_{21}N_7O$ : C, 57.13; H, 6.71; N, 31.09. Found: C, 57.39; H, 7.08; N, 31.47.

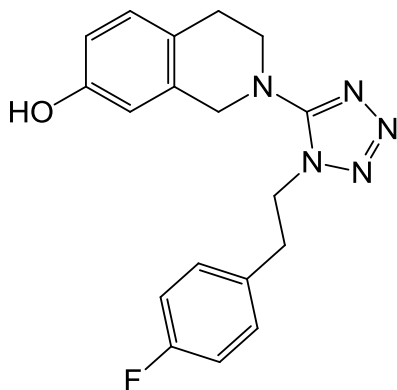

**2-(1-(4-Fluorophenethyl)-1H-tetrazol-5-yl)-1,2,3,4-tetrahydroisoquinolin-7-ol (8{53,236})**. Yellow oil.  $^1H$  NMR (500 MHz,  $DMSO-d_6$ ):  $\delta$  9.23 (s, 1H), 7.19 – 7.15 (m, 2H), 7.08 – 7.03 (m, 2H), 6.95 (d,  $J = 8.3$  Hz, 1H), 6.61 (d,  $J = 8.3$  Hz, 1H), 6.53 (s, 1H), 4.52 (t,  $J = 7.1$  Hz, 2H), 4.28 (s, 2H), 3.40 (t,  $J = 6.0$  Hz, 2H), 3.16 (t,  $J = 6.9$  Hz, 2H), 2.77 (t,  $J = 6.0$  Hz, 2H) ppm.  $^{13}C\{^1H\}$  NMR (126 MHz,  $DMSO-d_6$ ):  $\delta$  161.1 (d,  $J = 242.4$  Hz), 158.5, 155.4, 133.7, 133.4 (d,  $J = 2.9$  Hz), 130.6 (d,  $J = 8.0$  Hz), 129.5, 123.5, 115.1 (d,  $J = 21.1$  Hz), 114.1, 112.4, 50.6, 48.1, 47.4, 33.0, 26.8 ppm.  $^{19}F\{^1H\}$  NMR (376 MHz,  $DMSO-d_6$ ):  $\delta$  -116.7 ppm. LC-MS ( $m/z$ ): 340 ( $M + H^+$ ). Anal. Calcd. for  $C_{18}H_{18}FN_5O$ : C, 63.70; H, 5.35; N, 20.64. Found: C, 64.08; H, 4.98; N, 20.68.

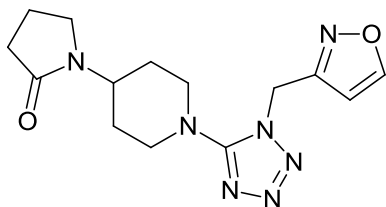

**1-(1-(1-(Isoxazol-3-ylmethyl)-1H-tetrazol-5-yl)piperidin-4-yl)pyrrolidin-2-one (8{56,108})**. Brown solid, mp = 88–92 °C.  $^1H$  NMR (500 MHz,  $DMSO-d_6$ ):  $\delta$  8.98 (d,  $J = 1.7$  Hz, 1H), 6.59 (d,  $J = 1.7$  Hz, 1H), 5.68 (s, 2H), 3.96 (tt,  $J = 12.1, 4.1$  Hz, 1H), 3.64 (d,  $J = 12.8$  Hz, 2H), 3.27 (t,  $J = 7.0$  Hz, 2H), 3.07 (td,  $J = 12.8, 2.4$  Hz, 2H), 2.22 (t,  $J = 8.1$  Hz, 2H), 1.90 (quint,  $J = 7.5$  Hz, 2H), 1.78 – 1.66 (m, 2H), 1.61 – 1.53 (m, 2H) ppm.  $^{13}C\{^1H\}$  NMR (126 MHz,  $DMSO-d_6$ ):  $\delta$  173.4, 161.1, 158.2, 157.6, 104.3, 48.8, 47.7, 42.4, 42.4, 30.9, 28.0, 17.7 ppm. LC-MS ( $m/z$ ): 318 ( $M + H^+$ ). Anal. Calcd. for  $C_{14}H_{19}N_7O_2$ : C, 52.99; H, 6.03; N, 30.90. Found: C, 52.85; H, 6.07; N, 30.72.

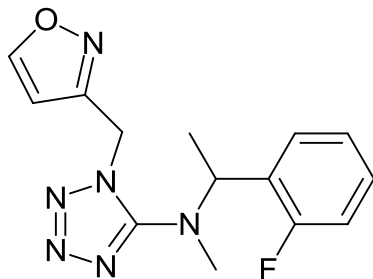

***N*-(1-(2-Fluorophenyl)ethyl)-1-(isoxazol-3-ylmethyl)-*N*-methyl-1*H*-tetrazol-5-amine (8{56,271}).** Brown oil.  $^1\text{H}$  NMR (500 MHz,  $\text{DMSO-}d_6$ ):  $\delta$  8.96 (s, 1H), 7.47 (t,  $J = 7.5$  Hz, 1H), 7.35 (q,  $J = 6.5$  Hz, 1H), 7.20 (t,  $J = 7.5$  Hz, 1H), 7.13 (dd,  $J = 10.8, 8.2$  Hz, 1H), 6.52 (s, 1H), 5.76 (d,  $J = 16.8$  Hz, 1H), 5.72 (d,  $J = 16.8$  Hz, 1H), 5.23 (q,  $J = 6.9$  Hz, 1H), 2.71 (s, 3H), 1.52 (d,  $J = 7.0$  Hz, 3H) ppm.  $^{13}\text{C}\{^1\text{H}\}$  NMR (126 MHz,  $\text{DMSO-}d_6$ ):  $\delta$  161.1, 160.2 (d,  $J = 246.0$  Hz), 158.2, 157.9, 129.8 (d,  $J = 8.6$  Hz), 128.7 (d,  $J = 4.0$  Hz), 126.5 (d,  $J = 13.7$  Hz), 124.3 (d,  $J = 3.3$  Hz), 115.4 (d,  $J = 22.1$  Hz), 104.0, 53.1, 42.5, 32.8, 15.8 ppm.  $^{19}\text{F}$  NMR (470 MHz,  $\text{DMSO-}d_6$ ):  $\delta$  -117.0 (dt,  $J = 11.8, 6.4$  Hz) ppm. LC-MS ( $m/z$ ): 303 ( $\text{M} + \text{H}^+$ ). Anal. Calcd. for  $\text{C}_{14}\text{H}_{15}\text{FN}_6\text{O}$ : C, 55.62; H, 5.00; N, 27.80. Found: C, 55.77; H, 4.61; N, 27.73.

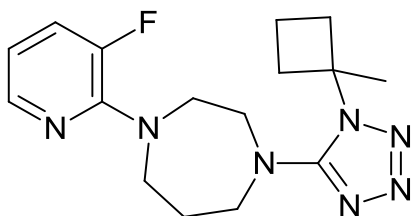

**1-(3-Fluoropyridin-2-yl)-4-(1-(1-methylcyclobutyl)-1*H*-tetrazol-5-yl)-1,4-diazepane (8{58,280}).** Brownish oil.  $^1\text{H}$  NMR (500 MHz,  $\text{DMSO-}d_6$ ):  $\delta$  7.90 – 7.87 (m, 1H), 7.41 (dd,  $J = 14.6, 7.8$  Hz, 1H), 6.66 (ddd,  $J = 7.8, 4.7, 2.9$  Hz, 1H), 3.85 (t,  $J = 5.2$  Hz, 2H), 3.68 (t,  $J = 5.3$  Hz, 2H), 3.51 (t,  $J = 5.3$  Hz, 2H), 3.36 – 3.33 (m, 2H), 2.71 (qd,  $J = 10.0, 2.7$  Hz, 2H), 2.25 (tt,  $J = 8.8, 2.6$  Hz, 2H), 2.01 – 1.89 (m, 3H), 1.82 – 1.75 (m, 1H), 1.64 (s, 3H) ppm.  $^{13}\text{C}\{^1\text{H}\}$  NMR (126 MHz,  $\text{DMSO-}d_6$ ):  $\delta$  157.1, 148.0 (d,  $J = 126.3$  Hz), 147.0 (d,  $J = 132.7$  Hz), 142.9 (d,  $J = 5.0$  Hz), 123.5 (d,  $J = 19.5$  Hz), 113.5 (d,  $J = 2.1$  Hz), 59.9, 52.7, 50.9, 49.4 (d,  $J = 4.7$  Hz), 48.4 (d,  $J = 7.1$  Hz), 33.9, 27.4, 24.9, 14.1 ppm.  $^{19}\text{F}$  NMR (470 MHz,  $\text{DMSO-}d_6$ ):  $\delta$  -131.8 (d,  $J = 14.6$  Hz) ppm. LC-MS ( $m/z$ ): 332 ( $\text{M} + \text{H}^+$ ). Anal. Calcd. for  $\text{C}_{16}\text{H}_{22}\text{FN}_7$ : C, 57.99; H, 6.69; N, 29.59. Found: C, 57.72; H, 6.69; N, 29.19.

#### Products obtained by BTTC-based method.

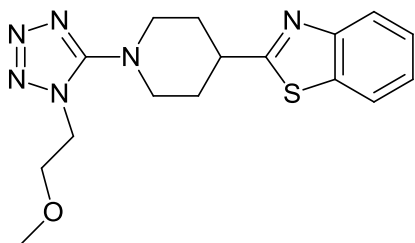

**2-(1-(1-(2-Methoxyethyl)-1*H*-tetrazol-5-yl)piperidin-4-yl)benzo[*d*]thiazole (9{4,289}).** Beige solid, mp = 90–93 °C.  $^1\text{H}$  NMR (500 MHz,  $\text{DMSO-}d_6$ ):  $\delta$  8.08 (d,  $J = 8.0$  Hz, 1H), 7.96 (d,  $J = 8.1$  Hz, 1H),

7.50 (t,  $J = 7.6$  Hz, 1H), 7.42 (t,  $J = 7.5$  Hz, 1H), 4.41 (t,  $J = 5.2$  Hz, 2H), 3.82 (t,  $J = 5.2$  Hz, 2H), 3.71 – 3.61 (m, 2H), 3.47 – 3.39 (m, 1H), 3.23 (s, 3H), 3.17 (t,  $J = 11.7$  Hz, 2H), 2.23 – 2.17 (m, 2H), 2.00 (qd,  $J = 12.1, 3.8$  Hz, 2H) ppm.  $^{13}\text{C}\{^1\text{H}\}$  NMR (126 MHz, DMSO- $d_6$ ):  $\delta$  174.8, 159.1, 152.6, 134.1, 126.1, 124.9, 122.4, 122.2, 68.6, 58.1, 49.4, 46.6, 39.5, 31.0 ppm. LC-MS ( $m/z$ ): 345 (M + H $^+$ ). Anal. Calcd. for C<sub>16</sub>H<sub>20</sub>N<sub>6</sub>OS: C, 55.79; H, 5.85; N, 24.40; S, 9.31. Found: C, 55.42; H, 5.56; N, 24.75; S, 9.48.

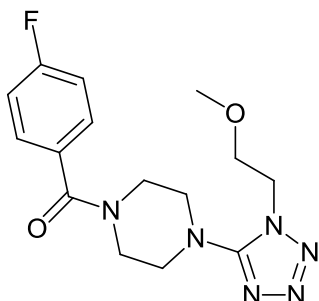

**(4-Fluorophenyl)(4-(1-(2-methoxyethyl)-1H-tetrazol-5-yl)piperazin-1-yl)methanone (9{4,291}).**

Brown oil.  $^1\text{H}$  NMR (500 MHz, DMSO- $d_6$ ):  $\delta$  7.52 (dd,  $J = 8.5, 5.6$  Hz, 2H), 7.29 (t,  $J = 8.8$  Hz, 2H), 4.41 (t,  $J = 5.2$  Hz, 2H), 3.79 (t,  $J = 5.2$  Hz, 2H), 3.74 – 3.40 (m, 4H), 3.33 – 3.24 (m, 4H), 3.21 (s, 3H) ppm.  $^{13}\text{C}\{^1\text{H}\}$  NMR (126 MHz, DMSO- $d_6$ ):  $\delta$  168.3, 162.6 (d,  $J = 246.7$  Hz), 158.6, 132.0 (d,  $J = 3.3$  Hz), 129.7 (d,  $J = 8.7$  Hz), 115.4 (d,  $J = 21.6$  Hz), 68.7, 58.1, 49.3 (2C), 46.6 ppm.  $^{19}\text{F}$  NMR (470 MHz, DMSO- $d_6$ ):  $\delta$  -111.0 (tt,  $J = 9.3, 5.5$  Hz) ppm. LC-MS ( $m/z$ ): 335 (M + H $^+$ ). Anal. Calcd. for C<sub>15</sub>H<sub>19</sub>FN<sub>6</sub>O<sub>2</sub>: C, 53.88; H, 5.73; N, 25.14. Found: C, 53.61; H, 5.83; N, 24.93.

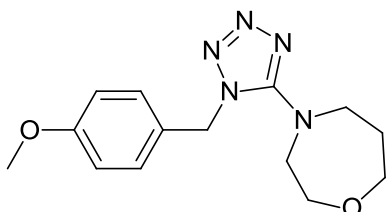

**4-(1-(4-Methoxybenzyl)-1H-tetrazol-5-yl)-1,4-oxazepane (9{18,300}).** Yellow oil.  $^1\text{H}$  NMR (500 MHz, DMSO- $d_6$ ):  $\delta$  7.10 (d,  $J = 8.6$  Hz, 2H), 6.93 (d,  $J = 8.6$  Hz, 2H), 5.49 (s, 2H), 3.73 (s, 3H), 3.69 – 3.64 (m, 2H), 3.60 (t,  $J = 5.6$  Hz, 2H), 3.57 – 3.50 (m, 4H), 1.81 (quint,  $J = 5.7$  Hz, 2H) ppm.  $^{13}\text{C}\{^1\text{H}\}$  NMR (126 MHz, DMSO- $d_6$ ):  $\delta$  158.9, 157.2, 128.1, 127.2, 114.3, 68.8, 68.8, 55.1, 52.8, 49.8, 49.3, 29.8 ppm. LC-MS ( $m/z$ ): = 290 (M + H $^+$ ). Anal. Calcd. for C<sub>14</sub>H<sub>19</sub>N<sub>5</sub>O<sub>2</sub>: C, 58.12; H, 6.62; N, 24.21. Found: C, 58.43; H, 6.59; N, 24.32.

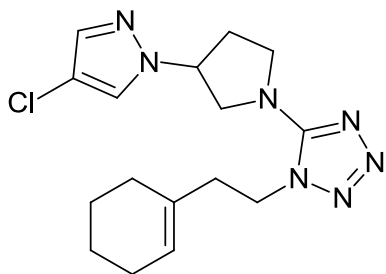

**5-(3-(4-Chloro-1H-pyrazol-1-yl)pyrrolidin-1-yl)-1-(2-(cyclohex-1-en-1-yl)ethyl)-1H-tetrazole**

(**9**{25,147}). Brown oil.  $^1\text{H}$  NMR (500 MHz, DMSO- $d_6$ ):  $\delta$  8.13 (s, 1H), 7.58 (s, 1H), 5.29 – 5.26 (m, 1H), 5.09 (tt,  $J = 6.3, 3.9$  Hz, 1H), 4.35 (t,  $J = 7.3$  Hz, 2H), 3.96 (dd,  $J = 10.5, 6.3$  Hz, 1H), 3.83 (dd,  $J = 10.4, 3.7$  Hz, 1H), 3.74 (q,  $J = 8.0$  Hz, 1H), 3.66 (td,  $J = 8.6, 5.1$  Hz, 1H), 2.47 – 2.39 (m, 2H), 2.34 (t,  $J = 7.3$  Hz, 2H), 1.91 – 1.86 (m, 2H), 1.85 – 1.80 (m, 2H), 1.54 – 1.48 (m, 2H), 1.45 – 1.40 (m, 2H) ppm.  $^{13}\text{C}\{^1\text{H}\}$  NMR (126 MHz, DMSO- $d_6$ ):  $\delta$  155.7, 137.2, 133.1, 127.4, 123.6, 108.3, 60.3, 54.3, 47.7, 45.3, 37.2, 30.9, 27.4, 24.6, 22.2, 21.7 ppm. LC-MS ( $m/z$ ): 348 ( $\text{M} + \text{H}^+$ ). Anal. Calcd. for  $\text{C}_{16}\text{H}_{22}\text{ClN}_7$ : C, 55.25; H, 6.38; N, 28.19; Cl, 10.19. Found: C, 54.89; H, 6.05; N, 28.50; Cl, 9.87.

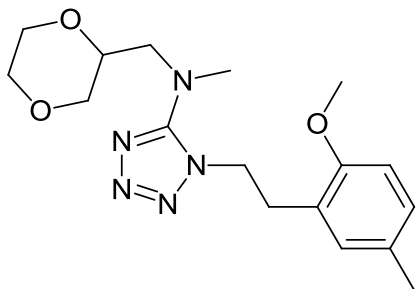**N-((1,4-Dioxan-2-yl)methyl)-1-(2-methoxy-5-methylphenethyl)-N-methyl-1H-tetrazol-5-amine**

(**9**{52,319}). Brown oil.  $^1\text{H}$  NMR (500 MHz, DMSO- $d_6$ ):  $\delta$  7.02 (d,  $J = 8.2$  Hz, 1H), 6.88 – 6.83 (m, 2H), 4.42 (t,  $J = 7.4$  Hz, 2H), 3.79 – 3.74 (m, 1H), 3.73 (s, 3H), 3.67 (d,  $J = 11.5$  Hz, 2H), 3.62 (d,  $J = 11.3$  Hz, 1H), 3.53 (td,  $J = 11.3, 2.5$  Hz, 1H), 3.42 (td,  $J = 11.3, 2.5$  Hz, 1H), 3.38 – 3.33 (m, 1H), 3.28 – 3.22 (m, 1H), 3.23 – 3.12 (m, 1H), 3.03 – 3.00 (m, 2H), 2.99 (s, 3H), 2.18 (s, 3H) ppm.  $^{13}\text{C}\{^1\text{H}\}$  NMR (126 MHz, DMSO- $d_6$ ):  $\delta$  158.1, 155.2, 131.0, 128.9, 128.5, 124.5, 110.6, 72.7, 68.1, 65.9, 65.7, 55.3, 53.9, 46.7, 39.2, 30.0, 20.0 ppm. LC-MS ( $m/z$ ): = 348 ( $\text{M} + \text{H}^+$ ). Anal. Calcd. for  $\text{C}_{17}\text{H}_{25}\text{N}_5\text{O}_3$ : C, 58.77; H, 7.25; N, 20.16. Found: C, 58.97; H, 7.31; N, 20.05.

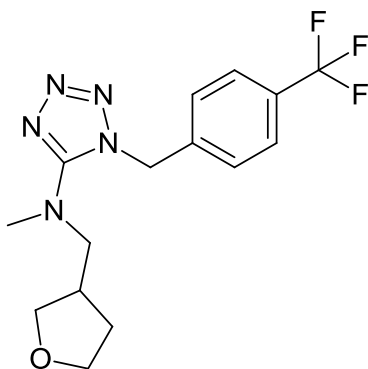**N-Methyl-N-((tetrahydrofuran-3-yl)methyl)-1-(4-(trifluoromethyl)benzyl)-1H-tetrazol-5-amine**

(**9**{55,337}). Colorless oil.  $^1\text{H}$  NMR (500 MHz, DMSO- $d_6$ ):  $\delta$  7.76 (d,  $J = 8.0$  Hz, 2H), 7.35 (d,  $J = 8.0$  Hz, 2H), 5.71 (s, 2H), 3.60 (td,  $J = 8.1, 5.3$  Hz, 1H), 3.55 – 3.43 (m, 2H), 3.24 (q,  $J = 13.6, 7.7$  Hz, 2H), 3.17 (dd,  $J = 8.5, 5.7$  Hz, 1H), 2.92 (s, 3H), 2.41 (dq,  $J = 14.1, 7.0$  Hz, 1H), 1.78 – 1.69 (m, 1H), 1.34 – 1.25 (m, 1H) ppm.  $^{13}\text{C}\{^1\text{H}\}$  NMR (126 MHz, DMSO- $d_6$ ):  $\delta$  158.3, 140.1, 128.6 (q,  $J = 31.9$  Hz), 127.6, 125.8 (q,  $J = 3.8$  Hz), 124.1 (q,  $J = 272.1$  Hz), 70.0, 66.6, 55.6, 49.6, 38.7, 36.9, 29.1 ppm.  $^{19}\text{F}$  NMR (470 MHz, DMSO- $d_6$ ):  $\delta$  -61.1 ppm. LC-MS ( $m/z$ ): = 342 ( $\text{M} + \text{H}^+$ ). Anal. Calcd. for  $\text{C}_{15}\text{H}_{18}\text{F}_3\text{N}_5\text{O}$ : C, 52.78; H, 5.32; N, 20.52. Found: C, 52.49; H, 5.39; N, 20.39.

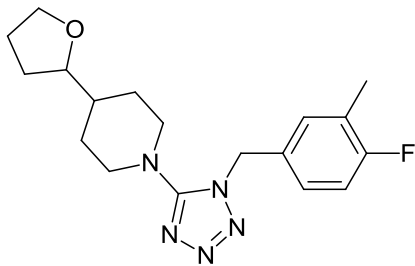

**1-(1-(4-Fluoro-3-methylbenzyl)-1H-tetrazol-5-yl)-4-(tetrahydrofuran-2-yl)piperidine (9{57,261}).** Beige solid, mp = 79–81 °C. <sup>1</sup>H NMR (500 MHz, DMSO-*d*<sub>6</sub>): δ 7.18 – 7.12 (m, 2H), 7.08 – 7.03 (m, 1H), 5.45 (s, 2H), 3.69 (q, *J* = 7.1 Hz, 1H), 3.58 (q, *J* = 7.2 Hz, 1H), 3.51 (d, *J* = 12.5 Hz, 2H), 3.44 (q, *J* = 7.2 Hz, 1H), 2.87 (dt, *J* = 12.8, 10.1 Hz, 2H), 2.21 (s, 3H), 1.90 – 1.82 (m, 1H), 1.81 – 1.74 (m, 3H), 1.54 (d, *J* = 13.5 Hz, 1H), 1.50 – 1.40 (m, 2H), 1.31 – 1.17 (m, 2H) ppm. <sup>13</sup>C{<sup>1</sup>H} NMR (126 MHz, DMSO-*d*<sub>6</sub>): δ 161.2, 159.3, 158.4, 130.6 (t, *J* = 4.7 Hz), 126.8 (d, *J* = 8.4 Hz), 124.7 (d, *J* = 17.7 Hz), 115.3 (d, *J* = 22.5 Hz), 82.0, 67.0, 49.37, 49.36, 49.28, 28.4, 27.8, 27.2, 25.3 (2C), 14.1 (d, *J* = 3.3 Hz) ppm. <sup>19</sup>F{<sup>1</sup>H} NMR (470 MHz, DMSO-*d*<sub>6</sub>): δ –118.6 ppm. LC–MS (*m/z*): 346 (M + H<sup>+</sup>). Anal. Calcd. for C<sub>18</sub>H<sub>24</sub>FN<sub>5</sub>O: C, 62.59; H, 7.00; N, 20.28. Found: C, 62.45; H, 6.88; N, 20.02.

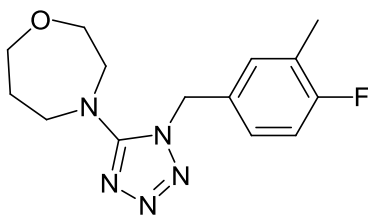

**4-(1-(4-Fluoro-3-methylbenzyl)-1H-tetrazol-5-yl)-1,4-oxazepane (9{57,300}).** White solid, mp = 107–109 °C. <sup>1</sup>H NMR (500 MHz, DMSO-*d*<sub>6</sub>): δ 7.14 (t, *J* = 9.1 Hz, 1H), 7.10 (d, *J* = 6.5 Hz, 1H), 7.02 – 6.95 (m, 1H), 5.52 (s, 2H), 3.66 (t, *J* = 4.9 Hz, 2H), 3.60 (t, *J* = 5.5 Hz, 2H), 3.58 – 3.52 (m, 4H), 2.20 (s, 3H), 1.85 – 1.78 (m, 2H) ppm. <sup>13</sup>C{<sup>1</sup>H} NMR (126 MHz, DMSO-*d*<sub>6</sub>): δ 160.2 (d, *J* = 243.4 Hz), 157.3, 131.2 (d, *J* = 3.4 Hz), 130.0 (d, *J* = 5.3 Hz), 126.1 (d, *J* = 8.4 Hz), 124.8 (d, *J* = 17.7 Hz), 115.4 (d, *J* = 22.6 Hz), 68.83, 68.77, 52.9, 49.6, 49.3, 29.8, 14.1 (d, *J* = 3.3 Hz) ppm. <sup>19</sup>F{<sup>1</sup>H} NMR (470 MHz, DMSO-*d*<sub>6</sub>): δ –118.63 ppm. LC–MS (*m/z*): = 292 (M + H<sup>+</sup>). Anal. Calcd. for C<sub>14</sub>H<sub>18</sub>FN<sub>5</sub>O: C, 57.72; H, 6.23; N, 24.04. Found: C, 57.59; H, 6.20; N, 24.18.

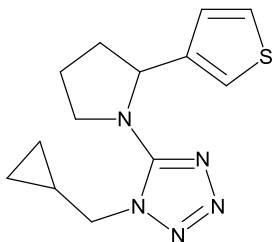

**1-(Cyclopropylmethyl)-5-(2-(thiophen-3-yl)pyrrolidin-1-yl)-1H-tetrazole (9{63,327}).** Beige solid, mp = 65–67 °C. <sup>1</sup>H NMR (500 MHz, DMSO-*d*<sub>6</sub>): δ 7.46 (dd, *J* = 4.9, 2.9 Hz, 1H), 7.27 – 7.25 (m, 1H), 7.03 (d, *J* = 4.9 Hz, 1H), 5.21 (dd, *J* = 7.5, 4.9 Hz, 1H), 4.07 (d, *J* = 7.1 Hz, 2H), 3.92 (dt, *J* = 9.4, 6.4 Hz, 1H), 3.54 (dt, *J* = 9.6, 7.2 Hz, 1H), 2.37 – 2.26 (m, 1H), 1.98 (quint, *J* = 6.7 Hz, 2H), 1.90 – 1.80 (m,



1H), 1.24 – 1.15 (m, 1H), 0.56 – 0.42 (m, 2H), 0.37 – 0.29 (m, 1H), 0.30 – 0.21 (m, 1H) ppm.  $^{13}\text{C}\{^1\text{H}\}$  NMR (126 MHz, DMSO- $d_6$ ):  $\delta$  155.8, 144.5, 126.6, 126.1, 120.9, 60.2, 50.8, 50.4, 34.4, 23.9, 10.7, 3.9, 3.6 ppm. LC-MS ( $m/z$ ): 276 ( $\text{M} + \text{H}^+$ ). Anal. Calcd. for  $\text{C}_{13}\text{H}_{17}\text{N}_5\text{S}$ : C, 56.70; H, 6.22; N, 25.43; S, 11.64. Found: C, 56.81; H, 6.48; N, 25.60; S, 11.47.

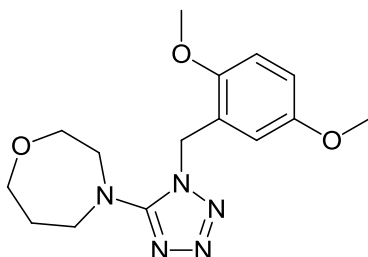

**4-(1-(2,5-Dimethoxybenzyl)-1H-tetrazol-5-yl)-1,4-oxazepane (9{68,300})**. Yellow solid, mp = 78–81 °C.  $^1\text{H}$  NMR (500 MHz, DMSO- $d_6$ ):  $\delta$  7.00 (d,  $J$  = 8.9 Hz, 1H), 6.90 (dd,  $J$  = 8.9, 3.0 Hz, 1H), 6.40 (d,  $J$  = 3.0 Hz, 1H), 5.41 (s, 2H), 3.74 (s, 3H), 3.70 – 3.67 (m, 2H), 3.65 (s, 3H), 3.62 (t,  $J$  = 5.7 Hz, 2H), 3.57 – 3.53 (m, 4H), 1.84 (quint,  $J$  = 5.7 Hz, 2H) ppm.  $^{13}\text{C}\{^1\text{H}\}$  NMR (126 MHz, DMSO- $d_6$ ):  $\delta$  157.6, 153.1, 150.2, 124.0, 114.2, 113.4, 112.3, 68.9, 68.9, 56.0, 55.4, 52.9, 49.2, 45.8, 29.9 ppm. LC-MS ( $m/z$ ): = 320 ( $\text{M} + \text{H}^+$ ). Anal. Calcd. for  $\text{C}_{15}\text{H}_{21}\text{N}_5\text{O}_3$ : C, 56.41; H, 6.63; N, 21.93. Found: C, 56.34; H, 6.61; N, 22.03.

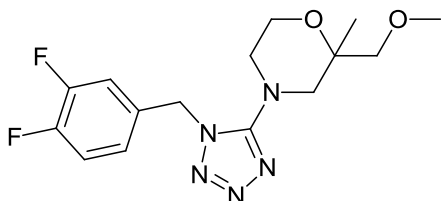

**4-(1-(3,4-Difluorobenzyl)-1H-tetrazol-5-yl)-2-(methoxymethyl)-2-methylmorpholine (9{77,363})**. Beige solid, mp = 89–91 °C.  $^1\text{H}$  NMR (500 MHz, DMSO- $d_6$ ):  $\delta$  7.48 (dt,  $J$  = 10.7, 8.5 Hz, 1H), 7.34 (ddd,  $J$  = 10.8, 7.8, 2.1 Hz, 1H), 7.08 – 7.01 (m, 1H), 5.57 (d,  $J$  = 16.4 Hz, 1H), 5.52 (d,  $J$  = 16.4 Hz, 1H), 3.70 (t,  $J$  = 5.0 Hz, 2H), 3.35 (d,  $J$  = 9.3 Hz, 1H), 3.21 (s, 3H), 3.20 – 3.16 (m, 3H), 3.15 (d,  $J$  = 12.4 Hz, 1H), 2.96 (d,  $J$  = 12.4 Hz, 1H), 1.07 (s, 3H) ppm.  $^{13}\text{C}\{^1\text{H}\}$  NMR (126 MHz, DMSO- $d_6$ ):  $\delta$  158.3, 149.4 (dd,  $J$  = 246.7, 12.8 Hz), 149.2 (dd,  $J$  = 246.3, 12.4 Hz), 132.2 (d,  $J$  = 5.4 Hz), 124.4 (dd,  $J$  = 6.8, 3.5 Hz), 118.0 (d,  $J$  = 17.4 Hz), 116.8 (d,  $J$  = 18.1 Hz), 74.6, 72.1, 59.4, 58.8, 54.3, 48.8 (2C), 20.3 ppm.  $^{19}\text{F}$  NMR (470 MHz, DMSO- $d_6$ ):  $\delta$  -137.8 – -137.9 (m, 1F), -139.3 – -139.4 (m, 1F) ppm. LC-MS ( $m/z$ ): 340 ( $\text{M} + \text{H}^+$ ). Anal. Calcd. for  $\text{C}_{15}\text{H}_{19}\text{F}_2\text{N}_5\text{O}_2$ : C, 53.09; H, 5.64; N, 20.64. Found: C, 53.44; H, 5.96; N, 20.87.

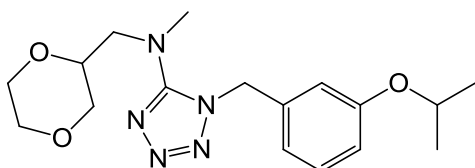

**N-((1,4-Dioxan-2-yl)methyl)-1-(3-isopropoxybenzyl)-N-methyl-1H-tetrazol-5-amine (9{84,319})**. Yellow oil.  $^1\text{H}$  NMR (500 MHz, DMSO- $d_6$ ):  $\delta$  7.27 (t,  $J$  = 7.8 Hz, 1H), 6.87 (d,  $J$  = 8.0 Hz, 1H), 6.66 (s,

2H), 5.56 (s, 2H), 4.55 (sept,  $J = 6.0$  Hz, 1H), 3.73 – 3.67 (m, 1H), 3.65 (d,  $J = 12.3$  Hz, 1H), 3.58 (d,  $J = 11.4$  Hz, 1H), 3.55 – 3.44 (m, 2H), 3.40 – 3.35 (m, 1H), 3.31 – 3.20 (m, 2H), 3.06 – 3.01 (m, 1H), 2.99 (s, 3H), 1.23 (d,  $J = 6.0$  Hz, 6H) ppm.  $^{13}\text{C}$  NMR ( $^1\text{H}$ ) (126 MHz, DMSO- $d_6$ ):  $\delta$  158.0, 157.7, 137.2, 130.0, 118.4, 114.8, 114.0, 72.6, 69.2, 67.9, 65.9, 65.6, 53.7, 49.9, 39.2, 21.7 ppm. LC-MS ( $m/z$ ): = 348 ( $\text{M} + \text{H}^+$ ). Anal. Calcd. for  $\text{C}_{17}\text{H}_{25}\text{N}_5\text{O}_3$ : C, 58.77; H, 7.25; N, 20.16. Found: C, 58.76; H, 7.17; N, 20.10.

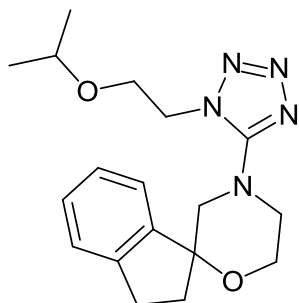

**4'-(1-(2-Isopropoxyethyl)-1H-tetrazol-5-yl)-2,3-dihydrospiro[indene-1,2'-morpholine] (9{90,371}).** Beige solid, mp = 104–106 °C.  $^1\text{H}$  NMR (500 MHz, DMSO- $d_6$ ):  $\delta$  7.48 (d,  $J = 7.5$  Hz, 1H), 7.30 – 7.27 (m, 2H), 7.24 – 7.19 (m, 1H), 4.42 – 4.30 (m, 2H), 3.90 – 3.86 (m, 2H), 3.85 – 3.77 (m, 2H), 3.48 – 3.39 (m, 3H), 3.32 – 3.26 (m, 1H), 3.17 (d,  $J = 12.2$  Hz, 1H), 3.02 – 2.94 (m, 1H), 2.90 – 2.82 (m, 1H), 2.56 – 2.52 (m, 1H), 2.12 (dt,  $J = 14.3, 7.6$  Hz, 1H), 0.88 (d,  $J = 6.1$  Hz, 3H), 0.85 (d,  $J = 6.1$  Hz, 3H) ppm.  $^{13}\text{C}$  ( $^1\text{H}$ ) NMR (126 MHz, DMSO- $d_6$ ):  $\delta$  159.2, 143.7, 143.3, 128.7, 126.2, 124.8, 124.1, 83.3, 71.1, 64.8, 61.1, 56.4, 49.3, 47.3, 34.4, 28.8, 21.5 ppm. LC-MS ( $m/z$ ): 344 ( $\text{M} + \text{H}^+$ ). Anal. Calcd. for  $\text{C}_{18}\text{H}_{25}\text{N}_5\text{O}_2$ : C, 62.95; H, 7.34; N, 20.39. Found: C, 63.11; H, 6.95; N, 20.38.

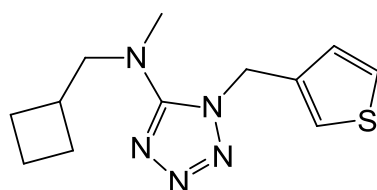

**N-(Cyclobutylmethyl)-N-methyl-1-(thiophen-3-ylmethyl)-1H-tetrazol-5-amine (9{102,356}).** Yellow oil.  $^1\text{H}$  NMR (500 MHz, DMSO- $d_6$ ):  $\delta$  7.61 – 7.54 (m, 1H), 7.37 (s, 1H), 6.95 (d,  $J = 5.1$  Hz, 1H), 5.52 (s, 2H), 3.29 (d,  $J = 7.2$  Hz, 2H), 2.92 (s, 3H), 2.50 – 2.44 (m, 1H), 1.88 – 1.80 (m, 2H), 1.80 – 1.72 (m, 1H), 1.71 – 1.62 (m, 1H), 1.58 – 1.47 (m, 2H) ppm.  $^{13}\text{C}$  ( $^1\text{H}$ ) NMR (126 MHz, DMSO)  $\delta$  158.0, 135.9, 127.5, 126.5, 123.3, 58.1, 46.1, 38.6, 33.3, 25.8, 18.1 ppm. LC-MS ( $m/z$ ): = 264 ( $\text{M} + \text{H}^+$ ). Anal. Calcd. for  $\text{C}_{12}\text{H}_{17}\text{N}_5\text{S}$ : C, 54.73; H, 6.51; N, 26.59; S, 12.17. Found: C, 54.63; H, 6.26; N, 26.55; S, 12.15.

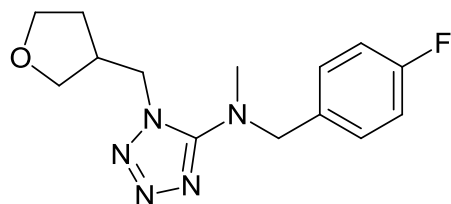

***N*-(4-Fluorobenzyl)-*N*-methyl-1-((tetrahydrofuran-3-yl)methyl)-1*H*-tetrazol-5-amine (9{103,386}).**

Brownish oil.  $^1\text{H}$  NMR (500 MHz,  $\text{DMSO-}d_6$ ):  $\delta$  7.36 (t,  $J = 8.5, 5.7$  Hz, 2H), 7.18 (t,  $J = 8.9$  Hz, 2H), 4.47 (s, 2H), 4.25 (d,  $J = 7.8$  Hz, 2H), 3.76 (td,  $J = 8.2, 5.5$  Hz, 1H), 3.69 – 3.59 (m, 2H), 3.42 (dd,  $J = 8.9, 5.4$  Hz, 1H), 2.91 (s, 3H), 2.81 – 2.73 (m, 1H), 1.98 – 1.88 (m, 1H), 1.59 – 1.51 (m, 1H) ppm.

$^{13}\text{C}\{^1\text{H}\}$  NMR (126 MHz,  $\text{DMSO-}d_6$ ):  $\delta$  161.5 (d,  $J = 243.2$  Hz), 158.6, 132.9 (d,  $J = 3.0$  Hz), 130.0 (d,  $J = 8.2$  Hz), 115.3 (d,  $J = 21.3$  Hz), 70.0, 66.7, 56.0, 49.3, 38.5, 38.3, 29.2 ppm.  $^{19}\text{F}$  NMR (470 MHz,  $\text{DMSO-}d_6$ ):  $\delta$  -115.1 (tt,  $J = 9.6, 5.7$  Hz) ppm. LC-MS ( $m/z$ ): 292 ( $\text{M} + \text{H}^+$ ). Anal. Calcd. for  $\text{C}_{14}\text{H}_{18}\text{FN}_5\text{O}$ : C, 57.72; H, 6.23; N, 24.04. Found: C, 57.45; H, 5.90; N, 24.30.

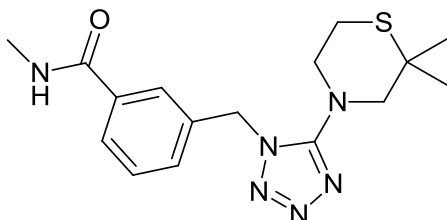

**3-((5-(2,2-Dimethylthiomorpholino)-1*H*-tetrazol-1-yl)methyl)-*N*-methylbenzamide (9{110,333}).**

Yellow solid, mp = 72–75 °C.  $^1\text{H}$  NMR (500 MHz,  $\text{DMSO-}d_6$ ):  $\delta$  8.51 – 8.42 (m, 1H), 7.80 (d,  $J = 7.7$  Hz, 1H), 7.69 (s, 1H), 7.48 (t,  $J = 7.7$  Hz, 1H), 7.35 (d,  $J = 7.7$  Hz, 1H), 5.60 (s, 2H), 3.42 – 3.36 (m, 2H), 3.23 (s, 2H), 2.76 (d,  $J = 4.5$  Hz, 3H), 2.73 – 2.69 (m, 2H), 1.12 (s, 6H) ppm.  $^{13}\text{C}\{^1\text{H}\}$  NMR (126 MHz,  $\text{DMSO-}d_6$ ):  $\delta$  166.0, 158.7, 135.0, 134.8, 129.9, 128.9, 126.6, 126.3, 62.4, 51.0, 49.9, 38.9, 26.6, 26.2, 24.0 ppm. LC-MS ( $m/z$ ): = 347 ( $\text{M} + \text{H}^+$ ). Anal. Calcd. for  $\text{C}_{16}\text{H}_{22}\text{N}_6\text{OS}$ : C, 55.47; H, 6.40; N, 24.26; S, 9.25. Found: C, 55.29; H, 6.21; N, 24.59; S, 9.65.

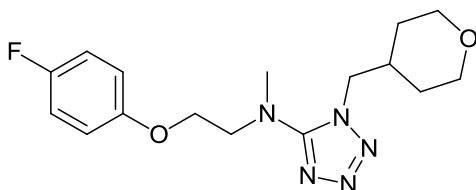

***N*-(2-(4-Fluorophenoxy)ethyl)-*N*-methyl-1-((tetrahydro-2*H*-pyran-4-yl)methyl)-1*H*-tetrazol-5-**

**amine (9{121,302}).** Yellow oil.  $^1\text{H}$  NMR (500 MHz,  $\text{DMSO-}d_6$ ):  $\delta$  7.10 (t,  $J = 8.8$  Hz, 2H), 6.87 (dd,  $J = 9.1, 4.2$  Hz, 2H), 4.19 (d,  $J = 7.3$  Hz, 2H), 4.15 (t,  $J = 5.1$  Hz, 2H), 3.76 (dd,  $J = 11.3, 3.1$  Hz, 2H), 3.69 (t,  $J = 5.1$  Hz, 2H), 3.16 (td,  $J = 11.8, 2.2$  Hz, 2H), 3.07 (s, 3H), 2.14 – 2.01 (m, 1H), 1.41 – 1.31 (m, 2H), 1.29 – 1.17 (m, 2H) ppm.  $^{13}\text{C}\{^1\text{H}\}$  NMR (126 MHz,  $\text{DMSO-}d_6$ ):  $\delta$  158.5, 156.6 (d,  $J = 236.0$  Hz), 154.5 (d,  $J = 1.7$  Hz), 115.9 (d,  $J = 23.0$  Hz), 115.6 (d,  $J = 8.1$  Hz), 66.3, 65.4, 52.4, 52.0, 39.1, 34.4, 29.7 ppm.  $^{19}\text{F}$  NMR (470 MHz,  $\text{DMSO-}d_6$ ):  $\delta$  -123.7 (tt,  $J = 8.8, 4.5$  Hz) ppm. LC-MS ( $m/z$ ): = 336 ( $\text{M} + \text{H}^+$ ). Anal. Calcd. for  $\text{C}_{16}\text{H}_{22}\text{FN}_5\text{O}_2$ : C, 57.30; H, 6.61; N, 20.88. Found: C, 57.12; H, 6.84; N, 20.61.

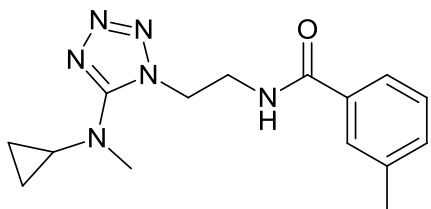

***N*-(2-(5-(Cyclopropyl(methyl)amino)-1*H*-tetrazol-1-yl)ethyl)-3-methylbenzamide** (**9**{146,322}). White solid, mp = 75–77 °C. <sup>1</sup>H NMR (500 MHz, DMSO-*d*<sub>6</sub>): δ 8.60 (t, *J* = 5.8 Hz, 1H), 7.60 (s, 1H), 7.56 (t, *J* = 5.0 Hz, 1H), 7.34 (d, *J* = 4.6 Hz, 2H), 4.54 (t, *J* = 6.1 Hz, 2H), 3.63 (dt, *J* = 5.8, 6.1 Hz, 2H), 2.93 (s, 3H), 2.84 (tt, *J* = 6.9, 3.6 Hz, 1H), 2.35 (s, 3H), 0.75 – 0.70 (m, 2H), 0.54 – 0.50 (m, 2H) ppm. <sup>13</sup>C{<sup>1</sup>H} NMR (126 MHz, DMSO-*d*<sub>6</sub>): δ 166.7, 158.6, 137.5, 134.0, 131.9, 128.2, 127.6, 124.2, 46.1, 39.4, 38.8, 33.4, 20.9, 8.2 ppm. LC–MS (*m/z*): = 301 (M + H<sup>+</sup>). Anal. Calcd. for C<sub>15</sub>H<sub>20</sub>N<sub>6</sub>O: C, 59.98; H, 6.71; N, 27.98. Found: C, 60.24; H, 6.96; N, 28.09.

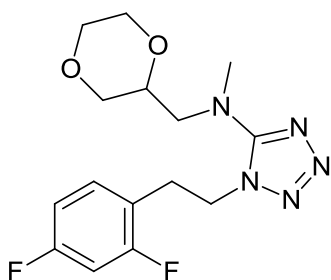

***N*-((1,4-Dioxan-2-yl)methyl)-1-(2,4-difluorophenethyl)-*N*-methyl-1*H*-tetrazol-5-amine** (**9**{151,319}). Beige solid, mp = 41–44 °C. <sup>1</sup>H NMR (500 MHz, DMSO-*d*<sub>6</sub>): δ 7.26 (q, *J* = 8.5 Hz, 1H), 7.19 (td, *J* = 9.9, 2.6 Hz, 1H), 7.01 (td, *J* = 8.6, 2.6 Hz, 1H), 4.52 (t, *J* = 7.1 Hz, 2H), 3.79 – 3.72 (m, 1H), 3.67 (d, *J* = 11.4 Hz, 2H), 3.62 (d, *J* = 11.2 Hz, 1H), 3.53 (td, *J* = 11.3, 2.5 Hz, 1H), 3.42 (td, *J* = 11.2, 2.7 Hz, 1H), 3.31 – 3.21 (m, 2H), 3.18 (dd, *J* = 11.4, 9.9 Hz, 1H), 3.12 (t, *J* = 7.0 Hz, 2H), 2.98 (s, 3H) ppm. <sup>13</sup>C{<sup>1</sup>H} NMR (126 MHz, DMSO-*d*<sub>6</sub>): δ 161.3 (dd, *J* = 245.3, 12.2 Hz), 160.6 (dd, *J* = 246.6, 12.2 Hz), 158.3, 132.3 (dd, *J* = 9.7, 6.2 Hz), 120.3 (dd, *J* = 15.9, 3.7 Hz), 111.5 (dd, *J* = 21.0, 3.6 Hz), 103.7 (t, *J* = 26.1 Hz), 72.6, 68.1, 65.9, 65.7, 54.1, 46.7, 39.3, 27.5 ppm. <sup>19</sup>F NMR (470 MHz, DMSO-*d*<sub>6</sub>): δ –111.9 (quint, *J* = 7.9 Hz), –114.4 (q, *J* = 8.9 Hz) ppm. LC–MS (*m/z*): = 340 (M + H<sup>+</sup>). Anal. Calcd. for C<sub>15</sub>H<sub>19</sub>F<sub>2</sub>N<sub>5</sub>O<sub>2</sub>: C, 53.09; H, 5.64; N, 20.64. Found: C, 53.37; H, 5.60; N, 20.31.

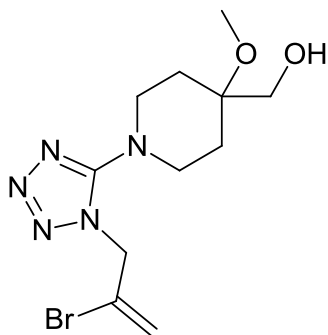

**1-(1-(2-Bromoallyl)-1*H*-tetrazol-5-yl)-4-methoxypiperidin-4-yl)methanol** (**9**{165,299}). Brown oil. <sup>1</sup>H NMR (500 MHz, DMSO-*d*<sub>6</sub>): δ 6.05 (d, *J* = 2.6 Hz, 1H), 5.82 (d, *J* = 2.6 Hz, 1H), 5.25 (s, 2H), 3.36 (s, 2H), 3.35 – 3.31 (m, 2H), 3.17 – 3.12 (m, 5H), 1.75 – 1.66 (m, 2H), 1.63 – 1.55 (m, 2H) ppm.

$^{13}\text{C}\{^1\text{H}\}$  NMR (126 MHz, DMSO- $d_6$ ):  $\delta$  158.4, 124.8, 121.9, 72.9, 64.0, 53.8, 48.6, 45.1, 29.2 ppm. LC-MS ( $m/z$ ): = 332/334 ( $\text{M} + \text{H}^+$ ). Anal. Calcd. for  $\text{C}_{11}\text{H}_{18}\text{BrN}_5\text{O}_2$ : C, 39.77; H, 5.46; N, 21.08; Br, 24.05. Found: C, 39.41; H, 5.73; N, 20.96; Br, 24.22.

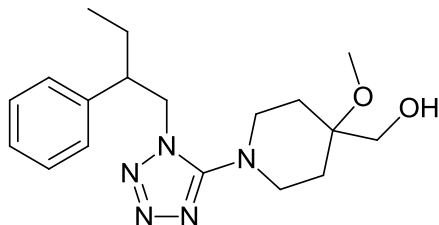

**(4-Methoxy-1-(1-(2-phenylbutyl)-1H-tetrazol-5-yl)piperidin-4-yl)methanol (9{175,299})**. Yellow oil.  $^1\text{H}$  NMR (500 MHz, DMSO- $d_6$ ):  $\delta$  7.23 (t,  $J = 7.5$  Hz, 2H), 7.17 (t,  $J = 7.2$  Hz, 1H), 7.11 (d,  $J = 7.0$  Hz, 2H), 4.63 (t,  $J = 5.6$  Hz, 1H), 4.49 (dd,  $J = 14.2, 6.0$  Hz, 1H), 4.36 (dd,  $J = 14.2, 9.2$  Hz, 1H), 3.37 (s, 1H), 3.36 (s, 1H), 3.14 (s, 3H), 3.12 – 3.06 (m, 1H), 3.04 – 2.91 (m, 3H), 1.75 – 1.62 (m, 4H), 1.61 – 1.48 (m, 2H), 0.75 (t,  $J = 7.3$  Hz, 3H) ppm.  $^{13}\text{C}\{^1\text{H}\}$  NMR (126 MHz, DMSO- $d_6$ ):  $\delta$  158.9, 140.7, 128.3, 127.7, 126.8, 72.8, 64.1, 51.8, 48.6, 45.9, 45.4, 45.1, 29.34, 29.31, 25.6, 11.7 ppm. LC-MS ( $m/z$ ): = 346 ( $\text{M} + \text{H}^+$ ). Anal. Calcd. for  $\text{C}_{18}\text{H}_{27}\text{N}_5\text{O}_2$ : C, 62.58; H, 7.88; N, 20.27. Found: C, 62.77; H, 7.62; N, 20.08.

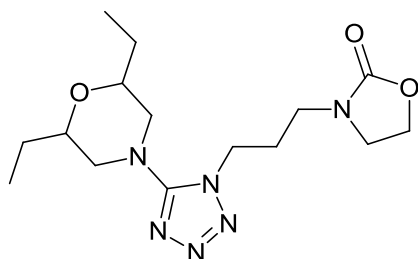

**3-(3-(5-(2,6-Diethylmorpholino)-1H-tetrazol-1-yl)propyl)oxazolidin-2-one (9{188,338})**. White solid, mp = 79–81 °C.  $^1\text{H}$  NMR (500 MHz, DMSO- $d_6$ ):  $\delta$  4.25 (d,  $J = 6.9$  Hz, 2H), 4.23 (t,  $J = 7.9$  Hz, 2H), 3.53 – 3.48 (m, 4H), 3.37 (d,  $J = 12.1$  Hz, 2H), 3.17 (t,  $J = 6.9$  Hz, 2H), 2.65 (t,  $J = 12.1, 10.5$  Hz, 2H), 2.09 (quint,  $J = 6.9$  Hz, 2H), 1.53 – 1.37 (m, 4H), 0.92 (t,  $J = 7.4$  Hz, 6H) ppm.  $^{13}\text{C}\{^1\text{H}\}$  NMR (126 MHz, DMSO- $d_6$ ):  $\delta$  158.7, 158.4, 76.1, 62.2, 53.7, 44.8, 44.5, 41.3, 26.2, 26.1, 10.0 ppm. LC-MS ( $m/z$ ): = 339 ( $\text{M} + \text{H}^+$ ). Anal. Calcd. for  $\text{C}_{15}\text{H}_{26}\text{N}_6\text{O}_3$ : C, 53.24; H, 7.74; N, 24.83. Found: C, 53.56; H, 8.04; N, 24.88.

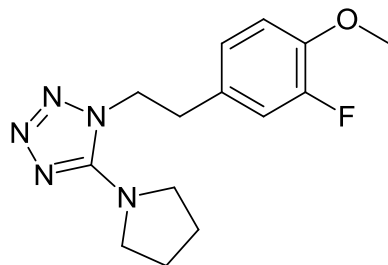

**1-(3-Fluoro-4-methoxyphenethyl)-5-(pyrrolidin-1-yl)-1H-tetrazole (9{190,341})**. White solid, mp = 70–72 °C.  $^1\text{H}$  NMR (500 MHz, DMSO- $d_6$ ):  $\delta$  7.07 – 7.01 (m, 2H), 6.87 (d,  $J = 8.5$  Hz, 1H), 4.48 (t,  $J = 7.2$  Hz, 2H), 3.78 (s, 3H), 3.43 – 3.38 (m, 4H), 3.01 (t,  $J = 7.2$  Hz, 2H), 1.90 – 1.83 (m, 4H) ppm.

$^{13}\text{C}\{^1\text{H}\}$  NMR (126 MHz, DMSO- $d_6$ ):  $\delta$  155.9, 151.2 (d,  $J = 243.5$  Hz), 145.8 (d,  $J = 10.4$  Hz), 130.2 (d,  $J = 6.2$  Hz), 125.0 (d,  $J = 3.3$  Hz), 116.3 (d,  $J = 17.7$  Hz), 113.7, 55.9, 49.0, 47.5, 34.1, 25.1 ppm.  $^{19}\text{F}$  NMR (470 MHz, DMSO- $d_6$ ):  $\delta$  -135.6 (dd,  $J = 12.5, 9.2$  Hz) ppm. LC-MS ( $m/z$ ): = 292 ( $M + \text{H}^+$ ). Anal. Calcd. for  $\text{C}_{14}\text{H}_{18}\text{FN}_5\text{O}$ : C, 57.72; H, 6.23; N, 24.04. Found: C, 58.04; H, 6.03; N, 23.88.

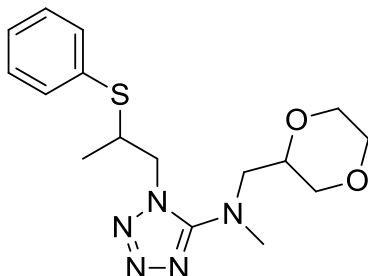

***N*-((1,4-Dioxan-2-yl)methyl)-*N*-methyl-1-(2-(phenylthio)propyl)-1*H*-tetrazol-5-amine (9{262,319})**. Yellow oil. The compound existed as *ca.* 1:1 mixture of diastereomers.  $^1\text{H}$  NMR (500 MHz, DMSO- $d_6$ ):  $\delta$  7.43 (t,  $J = 8.3$  Hz, 2H), 7.40 – 7.29 (m, 3H), 4.44 – 4.32 (m, 2H), 3.79 – 3.69 (m, 2H), 3.67 – 3.59 (m, 3H), 3.50 (t,  $J = 11.4$  Hz, 1H), 3.44 – 3.36 (m, 1H), 3.28 – 3.08 (m, 3H), 2.92 (s, 1.5H) and 2.91 (s, 1.5H), 1.23 (d,  $J = 6.8$  Hz, 1.5H) and 1.19 (d,  $J = 6.8$  Hz, 1.5H) ppm.  $^{13}\text{C}\{^1\text{H}\}$  NMR (126 MHz, DMSO- $d_6$ ):  $\delta$  158.5 and 158.4, 132.57 and 132.55, 132.4 and 132.3, 129.3 and 129.2, 127.8 and 127.7, 72.7, 72.5, 68.1 and 68.0, 65.9, 65.7, 54.02 and 53.95, 51.9 and 51.8, 41.64 and 41.56, 18.4 and 18.3 ppm. LC-MS ( $m/z$ ): = 350 ( $M + \text{H}^+$ ). Anal. Calcd. for  $\text{C}_{16}\text{H}_{23}\text{N}_5\text{O}_2\text{S}$ : C, 54.99; H, 6.63; N, 20.04; S, 9.17. Found: C, 54.87; H, 6.82; N, 20.09; S, 8.90.

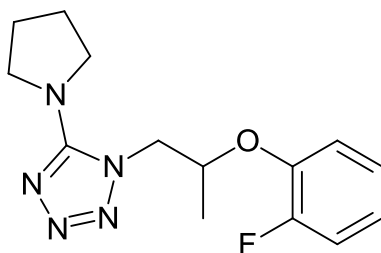

**1-(2-(2-Fluorophenoxy)propyl)-5-(pyrrolidin-1-yl)-1*H*-tetrazole (9{263,341})**. Beige solid, mp = 78–80 °C.  $^1\text{H}$  NMR (500 MHz, DMSO- $d_6$ ):  $\delta$  7.15 (dd,  $J = 11.7, 8.1$  Hz, 1H), 7.06 – 7.02 (m, 2H), 6.94 – 6.87 (m, 1H), 4.85 (sext,  $J = 6.2$  Hz, 1H), 4.62 – 4.56 (m, 2H), 3.63 – 3.55 (m, 2H), 3.51 – 3.43 (m, 2H), 1.94 – 1.88 (m, 4H), 1.34 (d,  $J = 6.2$  Hz, 3H) ppm.  $^{13}\text{C}\{^1\text{H}\}$  NMR (126 MHz, DMSO- $d_6$ ):  $\delta$  155.9, 152.3 (d,  $J = 243.6$  Hz), 144.7 (d,  $J = 10.4$  Hz), 124.7 (d,  $J = 3.7$  Hz), 121.8 (d,  $J = 7.0$  Hz), 116.4, 116.2 (d,  $J = 18.2$  Hz), 73.8, 51.0, 48.9, 25.2, 17.0 ppm.  $^{19}\text{F}$  NMR (470 MHz, DMSO- $d_6$ ):  $\delta$  -134.51 – -134.66 (m) ppm. LC-MS ( $m/z$ ): = 292 ( $M + \text{H}^+$ ). Anal. Calcd. for  $\text{C}_{14}\text{H}_{18}\text{FN}_5\text{O}$ : C, 57.72; H, 6.23; N, 24.04. Found: C, 57.44; H, 6.51; N, 24.32.

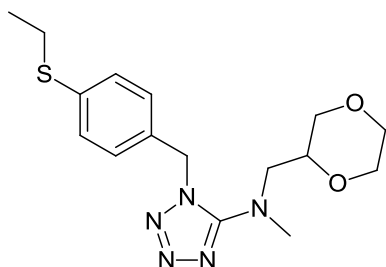

***N*-((1,4-Dioxan-2-yl)methyl)-1-(4-(ethylthio)benzyl)-*N*-methyl-1*H*-tetrazol-5-amine (9{272,319}).** Yellow oil.  $^1\text{H}$  NMR (500 MHz,  $\text{DMSO-}d_6$ ):  $\delta$  7.31 (d,  $J = 8.3$  Hz, 2H), 7.10 (d,  $J = 8.3$  Hz, 2H), 5.56 (s, 2H), 3.72 – 3.67 (m, 1H), 3.65 (d,  $J = 11.3$  Hz, 1H), 3.58 (d,  $J = 11.1$  Hz, 1H), 3.53 (dd,  $J = 11.4, 2.6$  Hz, 1H), 3.48 (td,  $J = 11.3, 2.6$  Hz, 1H), 3.36 (td,  $J = 11.3, 2.7$  Hz, 1H), 3.32 – 3.21 (m, 2H), 3.03 (dd,  $J = 11.4, 9.9$  Hz, 1H), 2.98 (s, 3H), 2.96 (q,  $J = 7.3$  Hz, 2H), 1.21 (t,  $J = 7.3$  Hz, 3H) ppm.  $^{13}\text{C}\{^1\text{H}\}$  NMR (126 MHz,  $\text{DMSO-}d_6$ ):  $\delta$  158.0, 136.3, 132.7, 128.0, 127.5, 72.5, 67.9, 65.8, 65.6, 53.7, 49.6, 39.3, 25.9, 14.1 ppm. LC–MS ( $m/z$ ): = 350 ( $\text{M} + \text{H}^+$ ). Anal. Calcd. for  $\text{C}_{16}\text{H}_{23}\text{N}_5\text{O}_2\text{S}$ : C, 54.99; H, 6.63; N, 20.04; S, 9.17. Found: C, 54.79; H, 6.72; N, 19.85; S, 9.54.

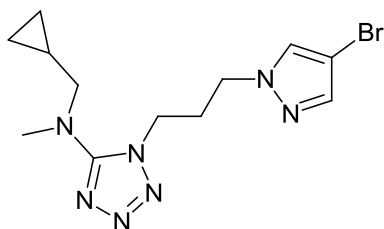

**1-(3-(4-Bromo-1*H*-pyrazol-1-yl)propyl)-*N*-(cyclopropylmethyl)-*N*-methyl-1*H*-tetrazol-5-amine (9{280,391}).** Yellow oil.  $^1\text{H}$  NMR (500 MHz,  $\text{DMSO-}d_6$ ):  $\delta$  7.98 (s, 1H), 7.56 (s, 1H), 4.17 (q,  $J = 6.8$  Hz, 4H), 3.05 (d,  $J = 6.8$  Hz, 2H), 2.95 (s, 3H), 2.31 (quint,  $J = 6.8$  Hz, 2H), 0.98 – 0.90 (m, 1H), 0.48 – 0.39 (m, 2H), 0.15 (dt,  $J = 5.8, 4.3$  Hz, 2H) ppm.  $^{13}\text{C}\{^1\text{H}\}$  NMR (126 MHz,  $\text{DMSO-}d_6$ ):  $\delta$  158.9, 139.7, 130.9, 92.0, 57.9, 49.3, 44.7, 38.8, 29.3, 9.0, 3.5 ppm. LC–MS ( $m/z$ ): = 340/342 ( $\text{M} + \text{H}^+$ ). Anal. Calcd. for  $\text{C}_{12}\text{H}_{18}\text{BrN}_7$ : C, 42.36; H, 5.33; N, 28.82; Br, 23.49. Found: C, 42.26; H, 5.31; N, 28.73; Br, 23.52.

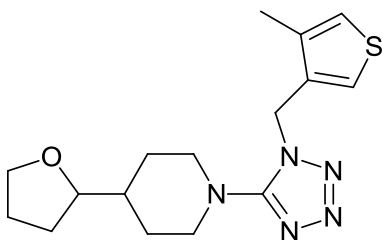

**1-(1-((4-Methylthiophen-3-yl)methyl)-1*H*-tetrazol-5-yl)-4-(tetrahydrofuran-2-yl)piperidine (9{306,261}).** Brown solid, mp = 64–66 °C.  $^1\text{H}$  NMR (500 MHz,  $\text{DMSO-}d_6$ ):  $\delta$  7.24 (d,  $J = 3.1$  Hz, 1H), 7.19 (d,  $J = 3.1$  Hz, 1H), 5.39 (s, 2H), 3.70 (dt,  $J = 8.1, 6.7$  Hz, 1H), 3.59 (q,  $J = 7.3$  Hz, 1H), 3.54 – 3.49 (m, 2H), 3.45 (q,  $J = 7.3$  Hz, 1H), 2.94 – 2.83 (m, 2H), 2.04 (s, 3H), 1.88 – 1.83 (m, 1H), 1.82 – 1.75 (m, 3H), 1.58 – 1.53 (m, 1H), 1.51 – 1.43 (m, 2H), 1.33 – 1.20 (m, 2H) ppm.  $^{13}\text{C}\{^1\text{H}\}$  NMR (126 MHz,  $\text{DMSO-}d_6$ ):  $\delta$  158.5, 135.8, 134.2, 124.6, 122.8, 82.1, 66.9, 49.5, 49.4, 45.3, 39.9, 28.5, 27.9, 27.3, 25.3, 13.7 ppm. LC–MS ( $m/z$ ): 334 ( $\text{M} + \text{H}^+$ ). Anal. Calcd. for  $\text{C}_{16}\text{H}_{23}\text{N}_5\text{OS}$ : C, 57.63; H, 6.95; N, 21.00; S, 9.61. Found: C, 57.86; H, 6.58; N, 20.84; S, 9.37.

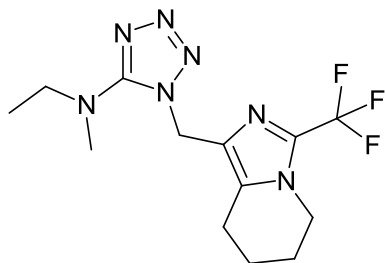

***N*-Ethyl-*N*-methyl-1-((3-(trifluoromethyl)-5,6,7,8-tetrahydroimidazo[1,5-*a*]pyridin-1-yl)methyl)-1*H*-tetrazol-5-amine (9{341,346}).** Beige solid, mp = 60–62 °C. <sup>1</sup>H NMR (500 MHz, DMSO-*d*<sub>6</sub>): δ 5.35 (s, 2H), 4.08 (t, *J* = 6.1 Hz, 2H), 3.41 (q, *J* = 7.1 Hz, 2H), 3.02 (s, 3H), 2.75 (t, *J* = 6.5 Hz, 2H), 1.94 – 1.88 (m, 2H), 1.80 – 1.74 (m, 2H), 1.07 (t, *J* = 7.1 Hz, 3H) ppm. <sup>13</sup>C{<sup>1</sup>H} NMR (126 MHz, DMSO-*d*<sub>6</sub>): δ 157.8, 131.7 (q, *J* = 38.4 Hz), 131.2, 130.0, 119.0 (q, *J* = 268.8 Hz), 47.9, 43.6, 43.5, 37.8, 21.7, 20.0, 18.6, 11.7 ppm. <sup>19</sup>F NMR (470 MHz, DMSO-*d*<sub>6</sub>): δ –60.9 ppm. LC–MS (*m/z*): = 330 (M + H<sup>+</sup>). Anal. Calcd. for C<sub>13</sub>H<sub>18</sub>F<sub>3</sub>N<sub>7</sub>: C, 47.41; H, 5.51; N, 29.77. Found: C, 47.53; H, 5.82; N, 29.58.

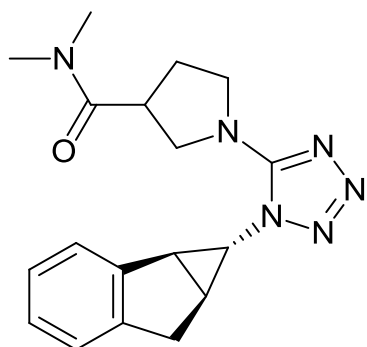

***rac*-*N,N*-dimethyl-1-(1-((1*R*,1*aS*,6*aS*)-1,1*a*,6,6*a*-tetrahydrocyclopropa[*a*]inden-1-yl)-1*H*-tetrazol-5-yl)pyrrolidine-3-carboxamide (9{375,511}).** Brown solid, mp = 60–63 °C. The compound existed as *ca.* 1:1 mixture of diastereomers. <sup>1</sup>H NMR (500 MHz, DMSO-*d*<sub>6</sub>): δ 7.49 – 7.41 (m, 1H), 7.29 – 7.24 (m, 1H), 7.21 – 7.17 (m, 2H), 3.88 (dd, *J* = 9.5, 7.8 Hz, 0.5H), 3.81 (d, *J* = 7.5 Hz, 1H), 3.79 – 3.72 (m, 0.5H), 3.71 – 3.57 (m, 2H), 3.56 – 3.47 (m, 1H), 3.30 (dd, *J* = 7.0, 3.8 Hz, 0.5H), 3.22 – 3.12 (m, 3.5H), 3.06 (s, 1.5H) and 3.03 (s, 1.5H), 2.87 (s, 1.5H) and 2.85 (s, 1.5H), 2.70 (t, *J* = 6.9 Hz, 0.5H) and 2.66 (t, *J* = 5.9 Hz, 0.5H), 2.25 – 2.14 (m, 1H), 2.10 – 1.97 (m, 1H) ppm. <sup>13</sup>C{<sup>1</sup>H} NMR (126 MHz, DMSO-*d*<sub>6</sub>): δ 171.4, 156.32 and 156.27, 142.1 and 142.0, 141.4 and 141.3, 126.8, 126.52 and 126.49, 125.25 and 125.23, 124.0, 51.5 and 51.4, 48.9 and 48.8, 40.4, 39.8, 36.72 and 36.70, 35.2 and 35.1, 34.1 and 34.0, 33.0, 28.73 and 28.70, 24.81 and 24.77 ppm. LC–MS (*m/z*): = 339 (M + H<sup>+</sup>). Anal. Calcd. for C<sub>18</sub>H<sub>22</sub>N<sub>6</sub>O: C, 63.89; H, 6.55; N, 24.83. Found: C, 63.66; H, 6.18; N, 24.49.



Figure S1. Structures of the reagents **10**{1–58}

|        |        |        |        |
|--------|--------|--------|--------|
|        |        |        |        |
| 10{1}  | 10{2}  | 10{3}  | 10{4}  |
|        |        |        |        |
| 10{5}  | 10{6}  | 10{7}  | 10{8}  |
|        |        |        |        |
| 10{9}  | 10{10} | 10{11} | 10{12} |
|        |        |        |        |
| 10{13} | 10{14} | 10{15} | 10{16} |
|        |        |        |        |
| 10{17} | 10{18} | 10{19} | 10{20} |

|                                                                                     |                                                                                     |                                                                                      |                                                                                       |
|-------------------------------------------------------------------------------------|-------------------------------------------------------------------------------------|--------------------------------------------------------------------------------------|---------------------------------------------------------------------------------------|
| 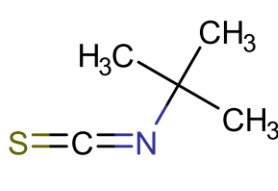   |    |    |    |
| 10{21}                                                                              | 10{22}                                                                              | 10{23}                                                                               | 10{24}                                                                                |
|    |    |    |    |
| 10{25}                                                                              | 10{26}                                                                              | 10{27}                                                                               | 10{28}                                                                                |
|   |   |   |   |
| 10{29}                                                                              | 10{30}                                                                              | 10{31}                                                                               | 10{32}                                                                                |
|  |  |  |  |
| 10{33}                                                                              | 10{34}                                                                              | 10{35}                                                                               | 10{36}                                                                                |
|  |  |  |  |
| 10{37}                                                                              | 10{38}                                                                              | 10{39}                                                                               | 10{40}                                                                                |

|                                                                                     |                                                                                     |                                                                                      |                                                                                       |
|-------------------------------------------------------------------------------------|-------------------------------------------------------------------------------------|--------------------------------------------------------------------------------------|---------------------------------------------------------------------------------------|
| 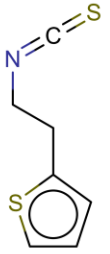   |    |    |    |
| 10{41}                                                                              | 10{42}                                                                              | 10{43}                                                                               | 10{44}                                                                                |
|    |    |    |    |
| 10{45}                                                                              | 10{46}                                                                              | 10{47}                                                                               | 10{48}                                                                                |
|   |   |    |   |
| 10{49}                                                                              | 10{50}                                                                              | 10{51}                                                                               | 10{52}                                                                                |
|  |  |  |  |
| 10{53}                                                                              | 10{54}                                                                              | 10{55}                                                                               | 10{56}                                                                                |
|  |  |                                                                                      |                                                                                       |
| 10{57}                                                                              | 10{58}                                                                              |                                                                                      |                                                                                       |

**Figure S2.** Structures of the reagents **11**{1–511}

|                                                                                              |                                                                                                |                                                                                                 |                                                                                       |
|----------------------------------------------------------------------------------------------|------------------------------------------------------------------------------------------------|-------------------------------------------------------------------------------------------------|---------------------------------------------------------------------------------------|
| <p>HCl</p> 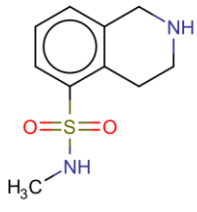 | <p>HCl</p>    |               |    |
| <p>11{1}</p>                                                                                 | <p>11{2}</p>                                                                                   | <p>11{3}</p>                                                                                    | <p>11{4}</p>                                                                          |
| <p>HCl</p>  |               | <p>HCl</p>    |    |
| <p>11{5}</p>                                                                                 | <p>11{6}</p>                                                                                   | <p>11{7}</p>                                                                                    | <p>11{8}</p>                                                                          |
|           | <p>HCl</p>  | <p>HCl</p>  |  |
| <p>11{9}</p>                                                                                 | <p>11{10}</p>                                                                                  | <p>11{11}</p>                                                                                   | <p>11{12}</p>                                                                         |
|           |             | <p>HCl</p>  |  |
| <p>11{13}</p>                                                                                | <p>11{14}</p>                                                                                  | <p>11{15}</p>                                                                                   | <p>11{16}</p>                                                                         |

|                                                                                                         |                                                                                              |                                                                                           |                                                                                                            |
|---------------------------------------------------------------------------------------------------------|----------------------------------------------------------------------------------------------|-------------------------------------------------------------------------------------------|------------------------------------------------------------------------------------------------------------|
| 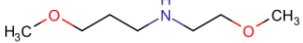                       |             | <br>HCl |                         |
| 11{17}                                                                                                  | 11{18}                                                                                       | 11{19}                                                                                    | 11{20}                                                                                                     |
| <br>HCl                | <br>HCl HCl |         |                         |
| 11{21}                                                                                                  | 11{22}                                                                                       | 11{23}                                                                                    | 11{24}                                                                                                     |
|                       | <br>Cl    |        | <br>HCl               |
| 11{25}                                                                                                  | 11{26}                                                                                       | 11{27}                                                                                    | 11{28}                                                                                                     |
| <br>H <sub>3</sub> C | <br>HCl   |       | <br>CH <sub>3</sub> F |
| 11{29}                                                                                                  | 11{30}                                                                                       | 11{31}                                                                                    | 11{32}                                                                                                     |

|                                                                                               |                                                                                                    |                                                                                                 |                                                                                                    |
|-----------------------------------------------------------------------------------------------|----------------------------------------------------------------------------------------------------|-------------------------------------------------------------------------------------------------|----------------------------------------------------------------------------------------------------|
| <p>HCl</p> 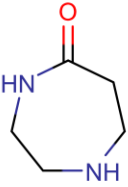  |                   |               | <p>HCl</p>      |
| 11{33}                                                                                        | 11{34}                                                                                             | 11{35}                                                                                          | 11{36}                                                                                             |
|              | <p>HCl HCl</p>    |               | <p>HCl HCl</p>  |
| 11{37}                                                                                        | 11{38}                                                                                             | 11{39}                                                                                          | 11{40}                                                                                             |
| <p>HCl</p>  | <p>HCl HCl</p>  | <p>HCl</p>   | <p>HCl</p>    |
| 11{41}                                                                                        | 11{42}                                                                                             | 11{43}                                                                                          | 11{44}                                                                                             |
|            |                 | <p>HCl</p>  |               |
| 11{45}                                                                                        | 11{46}                                                                                             | 11{47}                                                                                          | 11{48}                                                                                             |

|        |        |        |        |
|--------|--------|--------|--------|
|        |        |        |        |
| 11{49} | 11{50} | 11{51} | 11{52} |
|        |        |        |        |
| 11{53} | 11{54} | 11{55} | 11{56} |
|        |        |        |        |
| 11{57} | 11{58} | 11{59} | 11{60} |
|        |        |        |        |
| 11{61} | 11{62} | 11{63} | 11{64} |

|                                                                                              |                                                                                                |                                                                                                 |                                                                                                  |
|----------------------------------------------------------------------------------------------|------------------------------------------------------------------------------------------------|-------------------------------------------------------------------------------------------------|--------------------------------------------------------------------------------------------------|
| <p>HCl</p> 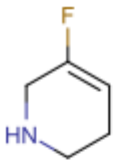 | <p>HCl</p>    | <p>HCl</p>    |               |
| 11{65}                                                                                       | 11{66}                                                                                         | 11{67}                                                                                          | 11{68}                                                                                           |
|             |               |               |               |
| 11{69}                                                                                       | 11{70}                                                                                         | 11{71}                                                                                          | 11{72}                                                                                           |
|            |              | <p>HCl</p>   |              |
| 11{73}                                                                                       | 11{74}                                                                                         | 11{75}                                                                                          | 11{76}                                                                                           |
|           | <p>HCl</p>  | <p>HCl</p>  | <p>HCl</p>  |
| 11{77}                                                                                       | 11{78}                                                                                         | 11{79}                                                                                          | 11{80}                                                                                           |



|                                                                                     |                                                                                     |                                                                                      |                                                                                            |
|-------------------------------------------------------------------------------------|-------------------------------------------------------------------------------------|--------------------------------------------------------------------------------------|--------------------------------------------------------------------------------------------|
| 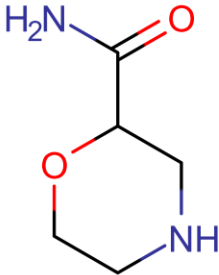   |    |    | <br>HCl |
| 11{81}                                                                              | 11{82}                                                                              | 11{83}                                                                               | 11{84}                                                                                     |
|    |    |    |         |
| 11{85}                                                                              | 11{86}                                                                              | 11{87}                                                                               | 11{88}                                                                                     |
|   |   |   |        |
| 11{89}                                                                              | 11{90}                                                                              | 11{91}                                                                               | 11{92}                                                                                     |
|  |  |  |       |
| 11{93}                                                                              | 11{94}                                                                              | 11{95}                                                                               | 11{96}                                                                                     |

|                                                                                            |                                                                                            |                                                                                             |                                                                                              |
|--------------------------------------------------------------------------------------------|--------------------------------------------------------------------------------------------|---------------------------------------------------------------------------------------------|----------------------------------------------------------------------------------------------|
| HCl<br>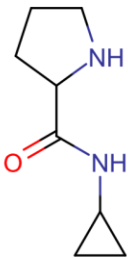   |           |           | HCl<br>   |
| 11{97}                                                                                     | 11{98}                                                                                     | 11{99}                                                                                      | 11{100}                                                                                      |
| HCl<br>   |           | HCl<br>   |           |
| 11{101}                                                                                    | 11{102}                                                                                    | 11{103}                                                                                     | 11{104}                                                                                      |
|          |         | HCl<br> |         |
| 11{105}                                                                                    | 11{106}                                                                                    | 11{107}                                                                                     | 11{108}                                                                                      |
| HCl<br> | HCl<br> | HCl<br> | HCl<br> |
| 11{109}                                                                                    | 11{110}                                                                                    | 11{111}                                                                                     | 11{112}                                                                                      |

|           |         |         |             |
|-----------|---------|---------|-------------|
|           | HCl<br> | HCl<br> | HCl<br>     |
| 11{113}   | 11{114} | 11{115} | 11{116}     |
|           | HCl<br> | HCl<br> | HCl HCl<br> |
| 11{117}   | 11{118} | 11{119} | 11{120}     |
| HI HI<br> |         | HCl<br> | HCl HCl<br> |
| 11{121}   | 11{122} | 11{123} | 11{124}     |
|           |         | HCl<br> | HCl<br>     |
| 11{125}   | 11{126} | 11{127} | 11{128}     |

|                                                                                            |                                                                                          |                                                                                             |                                                                                              |
|--------------------------------------------------------------------------------------------|------------------------------------------------------------------------------------------|---------------------------------------------------------------------------------------------|----------------------------------------------------------------------------------------------|
| HCl<br>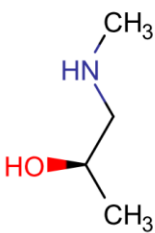   | HCl<br> | HCl<br>   | HCl<br>   |
| 11{129}                                                                                    | 11{130}                                                                                  | 11{131}                                                                                     | 11{132}                                                                                      |
| HCl<br>   | HCl<br> | HCl<br>   | HCl<br>   |
| 11{133}                                                                                    | 11{134}                                                                                  | 11{135}                                                                                     | 11{136}                                                                                      |
|         |       |          | HCl<br> |
| 11{137}                                                                                    | 11{138}                                                                                  | 11{139}                                                                                     | 11{140}                                                                                      |
| HCl<br> |       | HCl<br> |         |
| 11{141}                                                                                    | 11{142}                                                                                  | 11{143}                                                                                     | 11{144}                                                                                      |

|                                                                                                                     |                                                                                                   |                                                                                                        |                                                                                                     |
|---------------------------------------------------------------------------------------------------------------------|---------------------------------------------------------------------------------------------------|--------------------------------------------------------------------------------------------------------|-----------------------------------------------------------------------------------------------------|
| 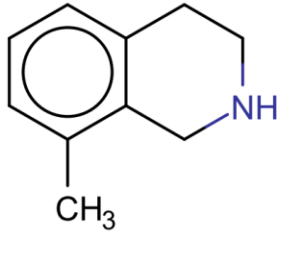                                   |  HCl HCl         |  Cl                  |  CH <sub>3</sub> |
| 11{145}                                                                                                             | 11{146}                                                                                           | 11{147}                                                                                                | 11{148}                                                                                             |
|                                    |  CH <sub>3</sub> |  CH <sub>3</sub> HCl |  F HCl           |
| 11{149}                                                                                                             | 11{150}                                                                                           | 11{151}                                                                                                | 11{152}                                                                                             |
|  H <sub>3</sub> C CH <sub>3</sub> |  HCl F HCl     |  Cl HCl            |  F F HCl       |
| 11{153}                                                                                                             | 11{154}                                                                                           | 11{155}                                                                                                | 11{156}                                                                                             |
|  F CH <sub>3</sub> HCl           |  F F HCl       |  F HCl             |  HCl           |
| 11{157}                                                                                                             | 11{158}                                                                                           | 11{159}                                                                                                | 11{160}                                                                                             |

|                                                                                                |                                                                                                |                                                                                                  |                                                                                                  |
|------------------------------------------------------------------------------------------------|------------------------------------------------------------------------------------------------|--------------------------------------------------------------------------------------------------|--------------------------------------------------------------------------------------------------|
| 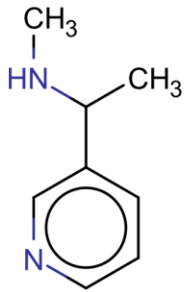              | <p>HCl</p>    |                |               |
| 11{161}                                                                                        | 11{162}                                                                                        | 11{163}                                                                                          | 11{164}                                                                                          |
|               | <p>HCl</p>    | <p>HCl HCl</p>  |               |
| 11{165}                                                                                        | 11{166}                                                                                        | 11{167}                                                                                          | 11{168}                                                                                          |
| <p>HCl</p>  |              |               | <p>HCl</p>  |
| 11{169}                                                                                        | 11{170}                                                                                        | 11{171}                                                                                          | 11{172}                                                                                          |
| <p>HCl</p>  | <p>HCl</p>  |              |             |
| 11{173}                                                                                        | 11{174}                                                                                        | 11{175}                                                                                          | 11{176}                                                                                          |

|                                                                                     |                                                                                     |                                                                                      |                                                                                       |
|-------------------------------------------------------------------------------------|-------------------------------------------------------------------------------------|--------------------------------------------------------------------------------------|---------------------------------------------------------------------------------------|
| 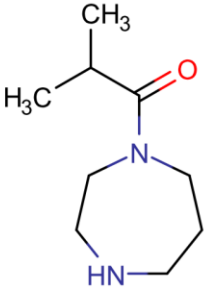   |    |    |    |
| 11{177}                                                                             | 11{178}                                                                             | 11{179}                                                                              | 11{180}                                                                               |
|    |    |    |    |
| 11{181}                                                                             | 11{182}                                                                             | 11{183}                                                                              | 11{184}                                                                               |
|  |  |   |  |
| 11{185}                                                                             | 11{186}                                                                             | 11{187}                                                                              | 11{188}                                                                               |
|  |  |  |  |
| 11{189}                                                                             | 11{190}                                                                             | 11{191}                                                                              | 11{192}                                                                               |

|                                                                                                |                                                                                              |                                                                                                     |                                                                                                |
|------------------------------------------------------------------------------------------------|----------------------------------------------------------------------------------------------|-----------------------------------------------------------------------------------------------------|------------------------------------------------------------------------------------------------|
| <p>HCl</p> 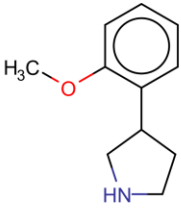   | <p>HCl</p>  | <p>HCl</p>        | <p>HCl</p>  |
| 11{193}                                                                                        | 11{194}                                                                                      | 11{195}                                                                                             | 11{196}                                                                                        |
| <p>HCl</p>    |             |                   |             |
| 11{197}                                                                                        | 11{198}                                                                                      | 11{199}                                                                                             | 11{200}                                                                                        |
|             |            | <p>HCl HCl</p>  |           |
| 11{201}                                                                                        | 11{202}                                                                                      | 11{203}                                                                                             | 11{204}                                                                                        |
| <p>HCl</p>  |           | <p>HCl HCl</p>   |           |
| 11{205}                                                                                        | 11{206}                                                                                      | 11{207}                                                                                             | 11{208}                                                                                        |



|                                                                                                    |                                                                                                    |                                                                                               |                                                                                                 |
|----------------------------------------------------------------------------------------------------|----------------------------------------------------------------------------------------------------|-----------------------------------------------------------------------------------------------|-------------------------------------------------------------------------------------------------|
| 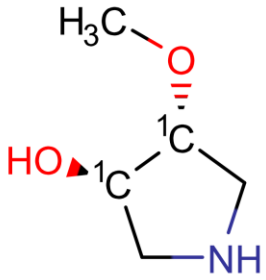                  | <p>HBr</p>        |              | <p>HCl</p>   |
| 11{209}                                                                                            | 11{210}                                                                                            | 11{211}                                                                                       | 11{212}                                                                                         |
| <p>HCl</p>        |                   | <p>HCl</p>  |              |
| 11{213}                                                                                            | 11{214}                                                                                            | 11{215}                                                                                       | 11{216}                                                                                         |
| <p>HCl</p>      |                  |             | <p>HCl</p>  |
| 11{217}                                                                                            | 11{218}                                                                                            | 11{219}                                                                                       | 11{220}                                                                                         |
| <p>HCl HCl</p>  | <p>HCl HCl</p>  |           |            |
| 11{221}                                                                                            | 11{222}                                                                                            | 11{223}                                                                                       | 11{224}                                                                                         |

|                                                                                                             |                                                                                                               |                                                                                                                |                                                                                                                 |
|-------------------------------------------------------------------------------------------------------------|---------------------------------------------------------------------------------------------------------------|----------------------------------------------------------------------------------------------------------------|-----------------------------------------------------------------------------------------------------------------|
| <p>HCl</p> 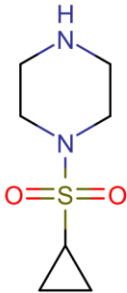 <p>11{225}</p> | <p>HCl</p>  <p>11{226}</p>   |  <p>11{227}</p>              |  <p>11{228}</p>              |
|  <p>11{229}</p>            |  <p>11{230}</p>              | <p>HCl</p>  <p>11{231}</p>   |  <p>11{232}</p>              |
|  <p>11{233}</p>           | <p>HCl</p>  <p>11{234}</p>  |  <p>11{235}</p>             |  <p>11{236}</p>            |
|  <p>11{237}</p>          | <p>HCl</p>  <p>11{238}</p> | <p>HCl</p>  <p>11{239}</p> | <p>HCl</p>  <p>11{240}</p> |

|                                                                                            |                                                                                            |                                                                                               |                                                                                                |
|--------------------------------------------------------------------------------------------|--------------------------------------------------------------------------------------------|-----------------------------------------------------------------------------------------------|------------------------------------------------------------------------------------------------|
| 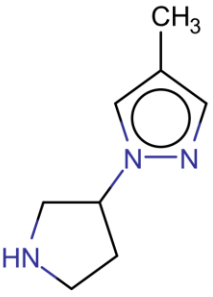          |           | <br>HCl HCl | <br>HCl HCl |
| 11{241}                                                                                    | 11{242}                                                                                    | 11{243}                                                                                       | 11{244}                                                                                        |
|           | <br>HCl   | <br>HBr     | <br>HCl HCl |
| 11{245}                                                                                    | 11{246}                                                                                    | 11{247}                                                                                       | 11{248}                                                                                        |
| <br>HCl  | <br>HCl |            | <br>HCl   |
| 11{249}                                                                                    | 11{250}                                                                                    | 11{251}                                                                                       | 11{252}                                                                                        |
| <br>HCl | <br>HCl | <br>HCl   |           |
| 11{253}                                                                                    | 11{254}                                                                                    | 11{255}                                                                                       | 11{256}                                                                                        |

|                                                                                                                 |                                                                                                               |                                                                                                     |                                                                                                                     |
|-----------------------------------------------------------------------------------------------------------------|---------------------------------------------------------------------------------------------------------------|-----------------------------------------------------------------------------------------------------|---------------------------------------------------------------------------------------------------------------------|
| <p>HCl HCl</p> 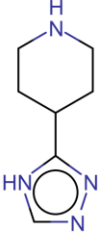 <p>11{257}</p> |  <p>11{258}</p>              |  <p>11{259}</p>   |  <p>11{260}</p>                  |
|  <p>11{261}</p>                |  <p>11{262}</p>              |  <p>11{263}</p>   |  <p>11{264}</p>                  |
|  <p>11{265}</p>               | <p>HCl</p>  <p>11{266}</p> |  <p>11{267}</p>  | <p>HCl</p>  <p>11{268}</p>     |
|  <p>11{269}</p>              |  <p>11{270}</p>            |  <p>11{271}</p> | <p>HCl HCl</p>  <p>11{272}</p> |

|                                                                                                |                                                                                                |                                                                                                 |                                                                                       |
|------------------------------------------------------------------------------------------------|------------------------------------------------------------------------------------------------|-------------------------------------------------------------------------------------------------|---------------------------------------------------------------------------------------|
| <p>HCl</p> 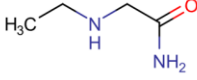   |               |               |    |
| 11{273}                                                                                        | 11{274}                                                                                        | 11{275}                                                                                         | 11{276}                                                                               |
| <p>HCl</p>    |               |               |    |
| 11{277}                                                                                        | 11{278}                                                                                        | 11{279}                                                                                         | 11{280}                                                                               |
|              |              | <p>HCl</p>  |   |
| 11{281}                                                                                        | 11{282}                                                                                        | 11{283}                                                                                         | 11{284}                                                                               |
| <p>HCl</p>  | <p>HCl</p>  |             |  |
| 11{285}                                                                                        | 11{286}                                                                                        | 11{287}                                                                                         | 11{288}                                                                               |

|                                                                                     |                                                                                     |                                                                                      |                                                                                       |
|-------------------------------------------------------------------------------------|-------------------------------------------------------------------------------------|--------------------------------------------------------------------------------------|---------------------------------------------------------------------------------------|
| 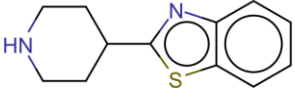   |    |    |    |
| 11{289}                                                                             | 11{290}                                                                             | 11{291}                                                                              | 11{292}                                                                               |
|    |    |    |    |
| 11{293}                                                                             | 11{294}                                                                             | 11{295}                                                                              | 11{296}                                                                               |
|   |   |  |  |
| 11{297}                                                                             | 11{298}                                                                             | 11{299}                                                                              | 11{300}                                                                               |
|  |  |  |  |
| 11{301}                                                                             | 11{302}                                                                             | 11{303}                                                                              | 11{304}                                                                               |

|                                                                                     |                                                                                     |                                                                                      |                                                                                       |
|-------------------------------------------------------------------------------------|-------------------------------------------------------------------------------------|--------------------------------------------------------------------------------------|---------------------------------------------------------------------------------------|
| 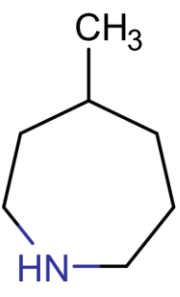   |    |    |    |
| 11{305}                                                                             | 11{306}                                                                             | 11{307}                                                                              | 11{308}                                                                               |
|    |    |    |    |
| 11{309}                                                                             | 11{310}                                                                             | 11{311}                                                                              | 11{312}                                                                               |
|  |   |   |  |
| 11{313}                                                                             | 11{314}                                                                             | 11{315}                                                                              | 11{316}                                                                               |
|  |  |  |  |
| 11{317}                                                                             | 11{318}                                                                             | 11{319}                                                                              | 11{320}                                                                               |

|                                                                                         |                                                                                         |                                                                                          |                                                                                           |
|-----------------------------------------------------------------------------------------|-----------------------------------------------------------------------------------------|------------------------------------------------------------------------------------------|-------------------------------------------------------------------------------------------|
| 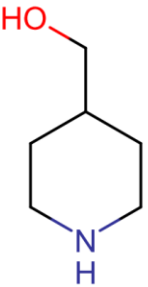       |        | HCl    | HCl    |
| 11{321}                                                                                 | 11{322}                                                                                 | 11{323}                                                                                  | 11{324}                                                                                   |
| HCl    | HCl    |        |        |
| 11{325}                                                                                 | 11{326}                                                                                 | 11{327}                                                                                  | 11{328}                                                                                   |
| HCl  | HCl  | HCl  | HCl  |
| 11{329}                                                                                 | 11{330}                                                                                 | 11{331}                                                                                  | 11{332}                                                                                   |
|      |      |      | HCl  |
| 11{333}                                                                                 | 11{334}                                                                                 | 11{335}                                                                                  | 11{336}                                                                                   |



|         |         |         |         |
|---------|---------|---------|---------|
|         |         |         |         |
| 11{337} | 11{338} | 11{339} | 11{340} |
|         |         |         |         |
| 11{341} | 11{342} | 11{343} | 11{344} |
|         |         |         |         |
| 11{345} | 11{346} | 11{347} | 11{348} |
|         |         |         |         |
| 11{349} | 11{350} | 11{351} | 11{352} |

|                                                                                              |                                                                                                |                                                                                                 |                                                                                       |
|----------------------------------------------------------------------------------------------|------------------------------------------------------------------------------------------------|-------------------------------------------------------------------------------------------------|---------------------------------------------------------------------------------------|
| <p>HCl</p> 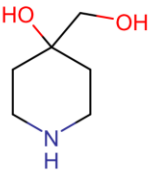 |               |               |    |
| 11{353}                                                                                      | 11{354}                                                                                        | 11{355}                                                                                         | 11{356}                                                                               |
|             |               |               |    |
| 11{357}                                                                                      | 11{358}                                                                                        | 11{359}                                                                                         | 11{360}                                                                               |
|            | <p>HCl</p>  |             |  |
| 11{361}                                                                                      | 11{362}                                                                                        | 11{363}                                                                                         | 11{364}                                                                               |
|           |             | <p>HCl</p>  |  |
| 11{365}                                                                                      | 11{366}                                                                                        | 11{367}                                                                                         | 11{368}                                                                               |

|                                                                                            |                                                                                     |                                                                                             |                                                                                                  |
|--------------------------------------------------------------------------------------------|-------------------------------------------------------------------------------------|---------------------------------------------------------------------------------------------|--------------------------------------------------------------------------------------------------|
| 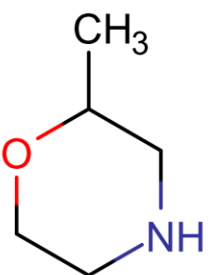          |    |           | <br>HCl       |
| 11{369}                                                                                    | 11{370}                                                                             | 11{371}                                                                                     | 11{372}                                                                                          |
| <br>HCl   |    |            |               |
| 11{373}                                                                                    | 11{374}                                                                             | 11{375}                                                                                     | 11{376}                                                                                          |
| <br>HCl |  | <br>HCl | <br>HCl      |
| 11{377}                                                                                    | 11{378}                                                                             | 11{379}                                                                                     | 11{380}                                                                                          |
| <br>HCl |  | <br>HCl | <br>HCl HCl |
| 11{381}                                                                                    | 11{382}                                                                             | 11{383}                                                                                     | 11{384}                                                                                          |

|                                                                                                             |                                                                                                             |                                                                                                                |                                                                                                      |
|-------------------------------------------------------------------------------------------------------------|-------------------------------------------------------------------------------------------------------------|----------------------------------------------------------------------------------------------------------------|------------------------------------------------------------------------------------------------------|
| <p>HCl</p> 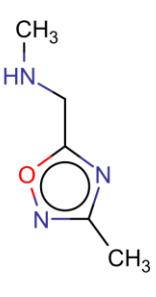 <p>11{385}</p> |  <p>11{386}</p>            |  <p>11{387}</p>              |  <p>11{388}</p>   |
| <p>HCl</p>  <p>11{389}</p> | <p>HCl</p>  <p>11{390}</p> |  <p>11{391}</p>              |  <p>11{392}</p>   |
|  <p>11{393}</p>           |  <p>11{394}</p>          |  <p>11{395}</p>            |  <p>11{396}</p> |
|  <p>11{397}</p>          |  <p>11{398}</p>          | <p>HCl</p>  <p>11{399}</p> |  <p>11{400}</p> |

|                                                                                     |                                                                                     |                                                                                      |                                                                                       |
|-------------------------------------------------------------------------------------|-------------------------------------------------------------------------------------|--------------------------------------------------------------------------------------|---------------------------------------------------------------------------------------|
| 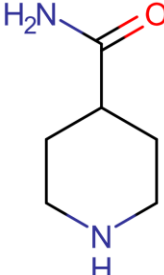   |    |    |    |
| 11{401}                                                                             | 11{402}                                                                             | 11{403}                                                                              | 11{404}                                                                               |
|    |    |    |    |
| 11{405}                                                                             | 11{406}                                                                             | 11{407}                                                                              | 11{408}                                                                               |
|  |  |   |   |
| 11{409}                                                                             | 11{410}                                                                             | 11{411}                                                                              | 11{412}                                                                               |
|  |  |  |  |
| 11{413}                                                                             | 11{414}                                                                             | 11{415}                                                                              | 11{416}                                                                               |

|                                                                                               |                                                                                                |                                                                                                 |                                                                                       |
|-----------------------------------------------------------------------------------------------|------------------------------------------------------------------------------------------------|-------------------------------------------------------------------------------------------------|---------------------------------------------------------------------------------------|
| 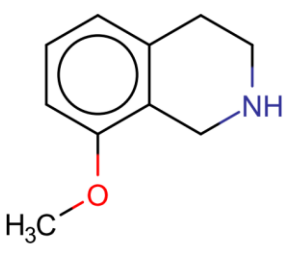 <p>HCl</p>  |  <p>HCl</p>   |               |    |
| 11{417}                                                                                       | 11{418}                                                                                        | 11{419}                                                                                         | 11{420}                                                                               |
|              |               |               |    |
| 11{421}                                                                                       | 11{422}                                                                                        | 11{423}                                                                                         | 11{424}                                                                               |
|  <p>HCl</p> |  <p>HCl</p> |  <p>HCl</p> |  |
| 11{425}                                                                                       | 11{426}                                                                                        | 11{427}                                                                                         | 11{428}                                                                               |
|            |             |             |  |
| 11{429}                                                                                       | 11{430}                                                                                        | 11{431}                                                                                         | 11{432}                                                                               |

|         |         |         |         |
|---------|---------|---------|---------|
|         |         |         |         |
| 11{433} | 11{434} | 11{435} | 11{436} |
| HCl     |         |         |         |
| 11{437} | 11{438} | 11{439} | 11{440} |
| HCl     |         |         |         |
| 11{441} | 11{442} | 11{443} | 11{444} |
| HCl     |         |         |         |
| 11{445} | 11{446} | 11{447} | 11{448} |

|         |         |         |         |
|---------|---------|---------|---------|
|         |         |         |         |
| 11{449} | 11{450} | 11{451} | 11{452} |
|         |         |         |         |
| 11{453} | 11{454} | 11{455} | 11{456} |
|         |         |         |         |
| 11{457} | 11{458} | 11{459} | 11{460} |
|         |         |         |         |
| 11{461} | 11{462} | 11{463} | 11{464} |



|                                                                                     |                                                                                     |                                                                                      |                                                                                       |
|-------------------------------------------------------------------------------------|-------------------------------------------------------------------------------------|--------------------------------------------------------------------------------------|---------------------------------------------------------------------------------------|
| 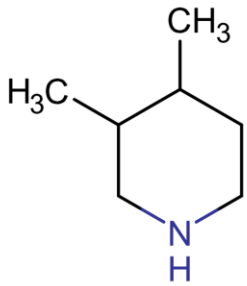   |    |    |    |
| 11{465}                                                                             | 11{466}                                                                             | 11{467}                                                                              | 11{468}                                                                               |
|    |    |    |    |
| 11{469}                                                                             | 11{470}                                                                             | 11{471}                                                                              | 11{472}                                                                               |
|   |   |  |   |
| 11{473}                                                                             | 11{474}                                                                             | 11{475}                                                                              | 11{476}                                                                               |
|  |  |  |  |
| 11{477}                                                                             | 11{478}                                                                             | 11{479}                                                                              | 11{480}                                                                               |

|         |         |         |         |
|---------|---------|---------|---------|
|         |         |         |         |
| 11{481} | 11{482} | 11{483} | 11{484} |
|         |         |         |         |
| 11{485} | 11{486} | 11{487} | 11{488} |
|         |         |         |         |
| 11{489} | 11{490} | 11{491} | 11{492} |
|         |         |         |         |
| 11{493} | 11{494} | 11{495} | 11{496} |

|                                                                                                |                                                                                                |                                                                                                 |                                                                                       |
|------------------------------------------------------------------------------------------------|------------------------------------------------------------------------------------------------|-------------------------------------------------------------------------------------------------|---------------------------------------------------------------------------------------|
| <p>HCl</p> 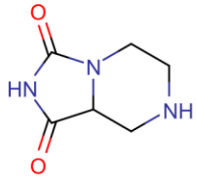   |               |               |    |
| 11{497}                                                                                        | 11{498}                                                                                        | 11{499}                                                                                         | 11{500}                                                                               |
|               |               |               |    |
| 11{501}                                                                                        | 11{502}                                                                                        | 11{503}                                                                                         | 11{504}                                                                               |
|              |             | <p>HCl</p>  |  |
| 11{505}                                                                                        | 11{506}                                                                                        | 11{507}                                                                                         | 11{508}                                                                               |
| <p>HCl</p>  | <p>HCl</p>  | <p>HCl</p>  |                                                                                       |
| 11{509}                                                                                        | 11{510}                                                                                        | 11{511}                                                                                         |                                                                                       |

Figure S3. Structures of the reagents **15**{1–378}

|                                                                                     |                                                                                     |                                                                                      |                                                                                       |
|-------------------------------------------------------------------------------------|-------------------------------------------------------------------------------------|--------------------------------------------------------------------------------------|---------------------------------------------------------------------------------------|
| 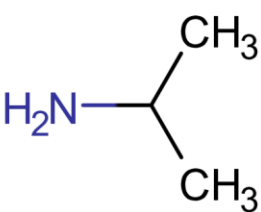   |    |    |    |
| 15{1}                                                                               | 15{2}                                                                               | 15{3}                                                                                | 15{4}                                                                                 |
|    |    |    |    |
| 15{5}                                                                               | 15{6}                                                                               | 15{7}                                                                                | 15{8}                                                                                 |
|  |  |  |  |
| 15{9}                                                                               | 15{10}                                                                              | 15{11}                                                                               | 15{12}                                                                                |
|  |  |  |  |
| 15{13}                                                                              | 15{14}                                                                              | 15{15}                                                                               | 15{16}                                                                                |

|                                                                                     |                                                                                     |                                                                                      |                                                                                       |
|-------------------------------------------------------------------------------------|-------------------------------------------------------------------------------------|--------------------------------------------------------------------------------------|---------------------------------------------------------------------------------------|
| 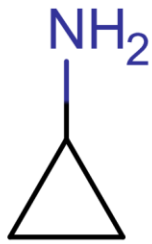   |    |    |    |
| 15{17}                                                                              | 15{18}                                                                              | 15{19}                                                                               | 15{20}                                                                                |
|    |    |    |    |
| 15{21}                                                                              | 15{22}                                                                              | 15{23}                                                                               | 15{24}                                                                                |
|   |   |  |   |
| 15{25}                                                                              | 15{26}                                                                              | 15{27}                                                                               | 15{28}                                                                                |
|  |  |  |  |
| 15{29}                                                                              | 15{30}                                                                              | 15{31}                                                                               | 15{32}                                                                                |

|                                                                                     |                                                                                     |                                                                                      |                                                                                       |
|-------------------------------------------------------------------------------------|-------------------------------------------------------------------------------------|--------------------------------------------------------------------------------------|---------------------------------------------------------------------------------------|
| 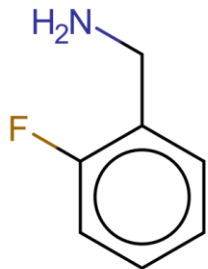   |    |     |    |
| 15{33}                                                                              | 15{34}                                                                              | 15{35}                                                                               | 15{36}                                                                                |
|    |    |    |    |
| 15{37}                                                                              | 15{38}                                                                              | 15{39}                                                                               | 15{40}                                                                                |
|   |   |   |   |
| 15{41}                                                                              | 15{42}                                                                              | 15{43}                                                                               | 15{44}                                                                                |
|  |  |  |  |
| 15{45}                                                                              | 15{46}                                                                              | 15{47}                                                                               | 15{48}                                                                                |

|                                                                                     |                                                                                     |                                                                                      |                                                                                       |
|-------------------------------------------------------------------------------------|-------------------------------------------------------------------------------------|--------------------------------------------------------------------------------------|---------------------------------------------------------------------------------------|
| 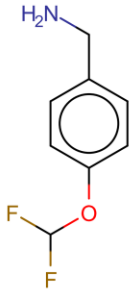   |    |    |    |
| 15{49}                                                                              | 15{50}                                                                              | 15{51}                                                                               | 15{52}                                                                                |
|    |    |    |    |
| 15{53}                                                                              | 15{54}                                                                              | 15{55}                                                                               | 15{56}                                                                                |
|   |   |   |   |
| 15{57}                                                                              | 15{58}                                                                              | 15{59}                                                                               | 15{60}                                                                                |
|  |  |  |  |
| 15{61}                                                                              | 15{62}                                                                              | 15{63}                                                                               | 15{64}                                                                                |

|                                                                                     |                                                                                     |                                                                                      |                                                                                       |
|-------------------------------------------------------------------------------------|-------------------------------------------------------------------------------------|--------------------------------------------------------------------------------------|---------------------------------------------------------------------------------------|
| 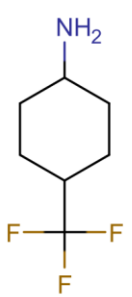   |    |    |    |
| 15{65}                                                                              | 15{66}                                                                              | 15{67}                                                                               | 15{68}                                                                                |
|    |    |    |    |
| 15{69}                                                                              | 15{70}                                                                              | 15{71}                                                                               | 15{72}                                                                                |
|   |   |   |  |
| 15{73}                                                                              | 15{74}                                                                              | 15{75}                                                                               | 15{76}                                                                                |
|  |  |  |  |
| 15{77}                                                                              | 15{78}                                                                              | 15{79}                                                                               | 15{80}                                                                                |



|                                                                                     |                                                                                     |                                                                                      |                                                                                       |
|-------------------------------------------------------------------------------------|-------------------------------------------------------------------------------------|--------------------------------------------------------------------------------------|---------------------------------------------------------------------------------------|
| 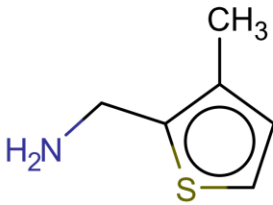   |    |    |    |
| 15{81}                                                                              | 15{82}                                                                              | 15{83}                                                                               | 15{84}                                                                                |
|    |    |    |    |
| 15{85}                                                                              | 15{86}                                                                              | 15{87}                                                                               | 15{88}                                                                                |
|   |  |  |   |
| 15{89}                                                                              | 15{90}                                                                              | 15{91}                                                                               | 15{92}                                                                                |
|  |  |  |  |
| 15{93}                                                                              | 15{94}                                                                              | 15{95}                                                                               | 15{96}                                                                                |

|                                                                                     |                                                                                     |                                                                                      |                                                                                       |
|-------------------------------------------------------------------------------------|-------------------------------------------------------------------------------------|--------------------------------------------------------------------------------------|---------------------------------------------------------------------------------------|
| 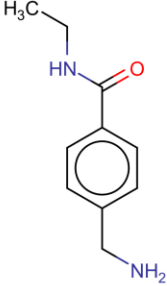   |    |    |    |
| 15{97}                                                                              | 15{98}                                                                              | 15{99}                                                                               | 15{100}                                                                               |
|    |    |    |    |
| 15{101}                                                                             | 15{102}                                                                             | 15{103}                                                                              | 15{104}                                                                               |
|   |   |   |   |
| 15{105}                                                                             | 15{106}                                                                             | 15{107}                                                                              | 15{108}                                                                               |
|  |  |  |  |
| 15{109}                                                                             | 15{110}                                                                             | 15{111}                                                                              | 15{112}                                                                               |

|                                                                                     |                                                                                         |                                                                                          |                                                                                       |
|-------------------------------------------------------------------------------------|-----------------------------------------------------------------------------------------|------------------------------------------------------------------------------------------|---------------------------------------------------------------------------------------|
| 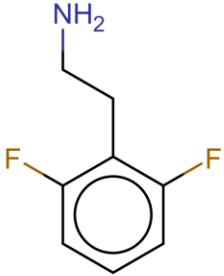   |        |        |    |
| 15{113}                                                                             | 15{114}                                                                                 | 15{115}                                                                                  | 15{116}                                                                               |
|    |        |        |    |
| 15{117}                                                                             | 15{118}                                                                                 | 15{119}                                                                                  | 15{120}                                                                               |
|   | HCl  |       |   |
| 15{121}                                                                             | 15{122}                                                                                 | 15{123}                                                                                  | 15{124}                                                                               |
|  | HCl  | HCl  |  |
| 15{125}                                                                             | 15{126}                                                                                 | 15{127}                                                                                  | 15{128}                                                                               |

|                                                                                                |                                                                                              |                                                                                      |                                                                                       |
|------------------------------------------------------------------------------------------------|----------------------------------------------------------------------------------------------|--------------------------------------------------------------------------------------|---------------------------------------------------------------------------------------|
| <p>HCl</p> 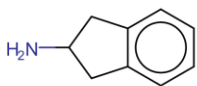   | <p>HCl</p>  |    |    |
| 15{129}                                                                                        | 15{130}                                                                                      | 15{131}                                                                              | 15{132}                                                                               |
|               |             |    |    |
| 15{133}                                                                                        | 15{134}                                                                                      | 15{135}                                                                              | 15{136}                                                                               |
|             |            |   |   |
| 15{137}                                                                                        | 15{138}                                                                                      | 15{139}                                                                              | 15{140}                                                                               |
| <p>HCl</p>  |           |  |  |
| 15{141}                                                                                        | 15{142}                                                                                      | 15{143}                                                                              | 15{144}                                                                               |

|                                                                                     |                                                                                     |                                                                                      |                                                                                       |
|-------------------------------------------------------------------------------------|-------------------------------------------------------------------------------------|--------------------------------------------------------------------------------------|---------------------------------------------------------------------------------------|
| 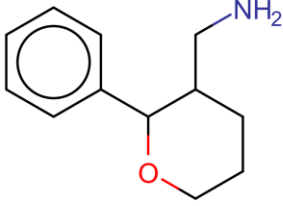   |    |    |    |
| 15{145}                                                                             | 15{146}                                                                             | 15{147}                                                                              | 15{148}                                                                               |
|    |    |    |    |
| 15{149}                                                                             | 15{150}                                                                             | 15{151}                                                                              | 15{152}                                                                               |
|  |  |   |   |
| 15{153}                                                                             | 15{154}                                                                             | 15{155}                                                                              | 15{156}                                                                               |
|  |  |  |  |
| 15{157}                                                                             | 15{158}                                                                             | 15{159}                                                                              | 15{160}                                                                               |

|                                                                                     |                                                                                     |                                                                                      |                                                                                       |
|-------------------------------------------------------------------------------------|-------------------------------------------------------------------------------------|--------------------------------------------------------------------------------------|---------------------------------------------------------------------------------------|
| 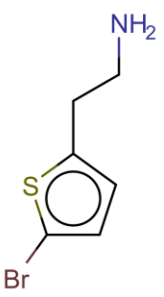   |    |    |    |
| 15{161}                                                                             | 15{162}                                                                             | 15{163}                                                                              | 15{164}                                                                               |
|    |    |    |    |
| 15{165}                                                                             | 15{166}                                                                             | 15{167}                                                                              | 15{168}                                                                               |
|   |  |  |   |
| 15{169}                                                                             | 15{170}                                                                             | 15{171}                                                                              | 15{172}                                                                               |
|  |  |  |  |
| 15{173}                                                                             | 15{174}                                                                             | 15{175}                                                                              | 15{176}                                                                               |

|                                                                                            |                                                                                          |                                                                                           |                                                                                       |
|--------------------------------------------------------------------------------------------|------------------------------------------------------------------------------------------|-------------------------------------------------------------------------------------------|---------------------------------------------------------------------------------------|
| 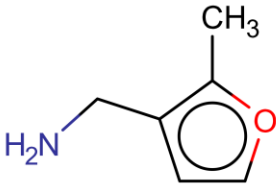          | <br>HCl |         |    |
| 15{177}                                                                                    | 15{178}                                                                                  | 15{179}                                                                                   | 15{180}                                                                               |
|           |         | <br>HCl |    |
| 15{181}                                                                                    | 15{182}                                                                                  | 15{183}                                                                                   | 15{184}                                                                               |
| <br>HCl |        |        |   |
| 15{185}                                                                                    | 15{186}                                                                                  | 15{187}                                                                                   | 15{188}                                                                               |
|         |       |       |  |
| 15{189}                                                                                    | 15{190}                                                                                  | 15{191}                                                                                   | 15{192}                                                                               |

|                                                                                            |                                                                                            |                                                                                      |                                                                                             |
|--------------------------------------------------------------------------------------------|--------------------------------------------------------------------------------------------|--------------------------------------------------------------------------------------|---------------------------------------------------------------------------------------------|
| HCl<br>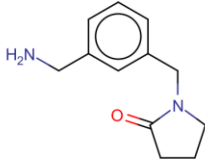   |           |    |          |
| 15{193}                                                                                    | 15{194}                                                                                    | 15{195}                                                                              | 15{196}                                                                                     |
| HCl<br>   |           |    |          |
| 15{197}                                                                                    | 15{198}                                                                                    | 15{199}                                                                              | 15{200}                                                                                     |
| HCl<br> |          |   | HCl<br> |
| 15{201}                                                                                    | 15{202}                                                                                    | 15{203}                                                                              | 15{204}                                                                                     |
| HCl<br> | HCl<br> |  |        |
| 15{205}                                                                                    | 15{206}                                                                                    | 15{207}                                                                              | 15{208}                                                                                     |



|                                                                                     |                                                                                            |                                                                                           |                                                                                            |
|-------------------------------------------------------------------------------------|--------------------------------------------------------------------------------------------|-------------------------------------------------------------------------------------------|--------------------------------------------------------------------------------------------|
| 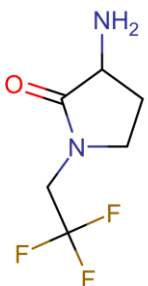   |           | HCl<br> | HCl<br> |
| 15{209}                                                                             | 15{210}                                                                                    | 15{211}                                                                                   | 15{212}                                                                                    |
|    |           |         |         |
| 15{213}                                                                             | 15{214}                                                                                    | 15{215}                                                                                   | 15{216}                                                                                    |
|   | HCl<br> |        |        |
| 15{217}                                                                             | 15{218}                                                                                    | 15{219}                                                                                   | 15{220}                                                                                    |
|  |         |       |       |
| 15{221}                                                                             | 15{222}                                                                                    | 15{223}                                                                                   | 15{224}                                                                                    |

|                                                                                              |                                                                                                |                                                                                                 |                                                                                                |
|----------------------------------------------------------------------------------------------|------------------------------------------------------------------------------------------------|-------------------------------------------------------------------------------------------------|------------------------------------------------------------------------------------------------|
| <p>HCl</p> 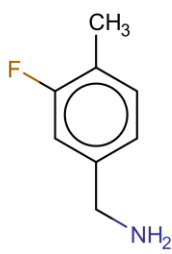 |               |               | <p>HCl</p>  |
| 15{225}                                                                                      | 15{226}                                                                                        | 15{227}                                                                                         | 15{228}                                                                                        |
|             | <p>HCl</p>    | <p>HCl</p>    | <p>HCl</p>  |
| 15{229}                                                                                      | 15{230}                                                                                        | 15{231}                                                                                         | 15{232}                                                                                        |
|            | <p>HCl</p>  |              |            |
| 15{233}                                                                                      | 15{234}                                                                                        | 15{235}                                                                                         | 15{236}                                                                                        |
|           | <p>HCl</p>  | <p>HCl</p>  |           |
| 15{237}                                                                                      | 15{238}                                                                                        | 15{239}                                                                                         | 15{240}                                                                                        |

|                                                                                       |                                                                                     |                                                                                      |                                                                                           |
|---------------------------------------------------------------------------------------|-------------------------------------------------------------------------------------|--------------------------------------------------------------------------------------|-------------------------------------------------------------------------------------------|
| 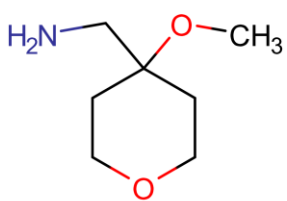     |    |    |        |
| 15{241}                                                                               | 15{242}                                                                             | 15{243}                                                                              | 15{244}                                                                                   |
| HCl  |    |    |        |
| 15{245}                                                                               | 15{246}                                                                             | 15{247}                                                                              | 15{248}                                                                                   |
|     |  |   |      |
| 15{249}                                                                               | 15{250}                                                                             | 15{251}                                                                              | 15{252}                                                                                   |
|    |  |  | HCl  |
| 15{253}                                                                               | 15{254}                                                                             | 15{255}                                                                              | 15{256}                                                                                   |

|                                                                                          |                                                                                            |                                                                                             |                                                                                            |
|------------------------------------------------------------------------------------------|--------------------------------------------------------------------------------------------|---------------------------------------------------------------------------------------------|--------------------------------------------------------------------------------------------|
| HCl<br> |           | HCl<br>   | HCl<br> |
| 15{257}                                                                                  | 15{258}                                                                                    | 15{259}                                                                                     | 15{260}                                                                                    |
| HCl<br> |           |           |         |
| 15{261}                                                                                  | 15{262}                                                                                    | 15{263}                                                                                     | 15{264}                                                                                    |
|        |         |          |        |
| 15{265}                                                                                  | 15{266}                                                                                    | 15{267}                                                                                     | 15{268}                                                                                    |
|       | HCl<br> | HCl<br> |       |
| 15{269}                                                                                  | 15{270}                                                                                    | 15{271}                                                                                     | 15{272}                                                                                    |

|                                                                                     |                                                                                     |                                                                                      |                                                                                       |
|-------------------------------------------------------------------------------------|-------------------------------------------------------------------------------------|--------------------------------------------------------------------------------------|---------------------------------------------------------------------------------------|
| 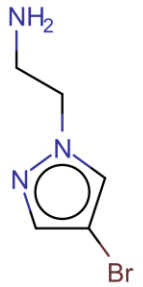   |    |    |    |
| 15{273}                                                                             | 15{274}                                                                             | 15{275}                                                                              | 15{276}                                                                               |
|    |    |    |    |
| 15{277}                                                                             | 15{278}                                                                             | 15{279}                                                                              | 15{280}                                                                               |
|  |   |   |   |
| 15{281}                                                                             | 15{282}                                                                             | 15{283}                                                                              | 15{284}                                                                               |
|  |  |  |  |
| 15{285}                                                                             | 15{286}                                                                             | 15{287}                                                                              | 15{288}                                                                               |

|                                                                                     |                                                                                     |                                                                                      |                                                                                       |
|-------------------------------------------------------------------------------------|-------------------------------------------------------------------------------------|--------------------------------------------------------------------------------------|---------------------------------------------------------------------------------------|
| 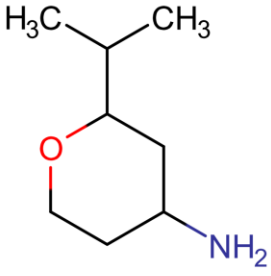   |    |    |    |
| 15{289}                                                                             | 15{290}                                                                             | 15{291}                                                                              | 15{292}                                                                               |
|    |    |    |    |
| 15{293}                                                                             | 15{294}                                                                             | 15{295}                                                                              | 15{296}                                                                               |
|   |  |  |   |
| 15{297}                                                                             | 15{298}                                                                             | 15{299}                                                                              | 15{300}                                                                               |
|  |  |  |  |
| 15{301}                                                                             | 15{302}                                                                             | 15{303}                                                                              | 15{304}                                                                               |

|                                                                                                |                                                                                                |                                                                                               |                                                                                                  |
|------------------------------------------------------------------------------------------------|------------------------------------------------------------------------------------------------|-----------------------------------------------------------------------------------------------|--------------------------------------------------------------------------------------------------|
| <p>HCl</p> 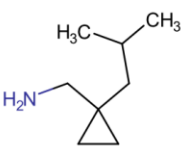   |               | <p>HCl</p>  |               |
| 15{305}                                                                                        | 15{306}                                                                                        | 15{307}                                                                                       | 15{308}                                                                                          |
|               |               |             |               |
| 15{309}                                                                                        | 15{310}                                                                                        | 15{311}                                                                                       | 15{312}                                                                                          |
|              |              |            |              |
| 15{313}                                                                                        | 15{314}                                                                                        | 15{315}                                                                                       | 15{316}                                                                                          |
| <p>HCl</p>  | <p>HCl</p>  |           | <p>HCl</p>  |
| 15{317}                                                                                        | 15{318}                                                                                        | 15{319}                                                                                       | 15{320}                                                                                          |

|                                                                                           |                                                                                            |                                                                                             |                                                                                              |
|-------------------------------------------------------------------------------------------|--------------------------------------------------------------------------------------------|---------------------------------------------------------------------------------------------|----------------------------------------------------------------------------------------------|
| HCl<br>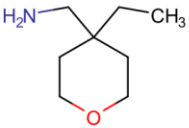  | HCl<br>   | HCl<br>   | HCl<br>   |
| 15{321}                                                                                   | 15{322}                                                                                    | 15{323}                                                                                     | 15{324}                                                                                      |
| HCl<br>  | HCl<br>   | HCl<br>   | HCl<br>   |
| 15{325}                                                                                   | 15{326}                                                                                    | 15{327}                                                                                     | 15{328}                                                                                      |
| HCl<br> | HCl<br> | HCl<br>  | HCl<br>  |
| 15{329}                                                                                   | 15{330}                                                                                    | 15{331}                                                                                     | 15{332}                                                                                      |
|        | HCl<br> | HCl<br> | HCl<br> |
| 15{333}                                                                                   | 15{334}                                                                                    | 15{335}                                                                                     | 15{336}                                                                                      |



|                                                                                     |                                                                                     |                                                                                      |                                                                                       |
|-------------------------------------------------------------------------------------|-------------------------------------------------------------------------------------|--------------------------------------------------------------------------------------|---------------------------------------------------------------------------------------|
| 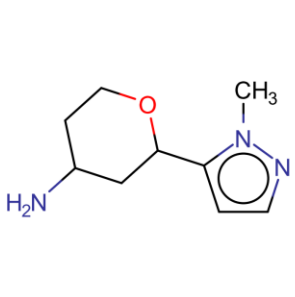   |    |    |    |
| 15{337}                                                                             | 15{338}                                                                             | 15{339}                                                                              | 15{340}                                                                               |
|    |    |    |    |
| 15{341}                                                                             | 15{342}                                                                             | 15{343}                                                                              | 15{344}                                                                               |
|   |   |   |   |
| 15{345}                                                                             | 15{346}                                                                             | 15{347}                                                                              | 15{348}                                                                               |
|  |  |  |  |
| 15{349}                                                                             | 15{350}                                                                             | 15{351}                                                                              | 15{352}                                                                               |

|                                                                                            |                                                                                           |                                                                                             |                                                                                              |
|--------------------------------------------------------------------------------------------|-------------------------------------------------------------------------------------------|---------------------------------------------------------------------------------------------|----------------------------------------------------------------------------------------------|
| HCl<br>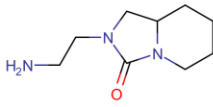   | HCl<br>  |           | HCl<br>   |
| 15{353}                                                                                    | 15{354}                                                                                   | 15{355}                                                                                     | 15{356}                                                                                      |
| HCl<br>   | HCl<br>  |           |           |
| 15{357}                                                                                    | 15{358}                                                                                   | 15{359}                                                                                     | 15{360}                                                                                      |
| HCl<br> | HCl<br> | HCl<br> | HCl<br> |
| 15{361}                                                                                    | 15{362}                                                                                   | 15{363}                                                                                     | 15{364}                                                                                      |
|         |        | HCl<br> | HCl<br> |
| 15{365}                                                                                    | 15{366}                                                                                   | 15{367}                                                                                     | 15{368}                                                                                      |

|         |                                                                                     |         |                                                                                     |     |                                                                                    |     |                                                                                     |
|---------|-------------------------------------------------------------------------------------|---------|-------------------------------------------------------------------------------------|-----|------------------------------------------------------------------------------------|-----|-------------------------------------------------------------------------------------|
| HCl     | 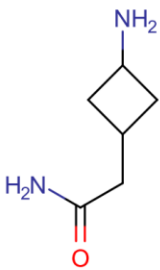   | HCl     |    | HCl |  | HCl |  |
| 15{369} | 15{370}                                                                             | 15{371} | 15{372}                                                                             |     |                                                                                    |     |                                                                                     |
| HCl     |    | HCl     |    | HCl |  | HCl |  |
| 15{373} | 15{374}                                                                             | 15{375} | 15{376}                                                                             |     |                                                                                    |     |                                                                                     |
| HCl     |  | HCl     |  |     |                                                                                    |     |                                                                                     |
| 15{377} | 15{378}                                                                             |         |                                                                                     |     |                                                                                    |     |                                                                                     |

**Table S1.** SMILES strings for the reagents **10**.

| #  | Reagent <b>10</b> | SMILE                            |
|----|-------------------|----------------------------------|
| 1  | <b>10</b> {1}     | <chem>C=CCN=C=S</chem>           |
| 2  | <b>10</b> {2}     | <chem>CN=C=S</chem>              |
| 3  | <b>10</b> {3}     | <chem>CCCCN=C=S</chem>           |
| 4  | <b>10</b> {4}     | <chem>CCN=C=S</chem>             |
| 5  | <b>10</b> {5}     | <chem>S=C=NCc1cccc1</chem>       |
| 6  | <b>10</b> {6}     | <chem>S=C=NCCc1cccc1</chem>      |
| 7  | <b>10</b> {7}     | <chem>S=C=NC1CCCCC1</chem>       |
| 8  | <b>10</b> {8}     | <chem>S=C=NCCN1CCOCC1</chem>     |
| 9  | <b>10</b> {9}     | <chem>COCCN=C=S</chem>           |
| 10 | <b>10</b> {10}    | <chem>CC(C)N=C=S</chem>          |
| 11 | <b>10</b> {11}    | <chem>CC(=C)CN=C=S</chem>        |
| 12 | <b>10</b> {12}    | <chem>CCOCCCN=C=S</chem>         |
| 13 | <b>10</b> {13}    | <chem>COc1ccc(CCN=C=S)cc1</chem> |
| 14 | <b>10</b> {14}    | <chem>CCCN=C=S</chem>            |
| 15 | <b>10</b> {15}    | <chem>S=C=NC1CC1</chem>          |
| 16 | <b>10</b> {16}    | <chem>COCC(C)N=C=S</chem>        |
| 17 | <b>10</b> {17}    | <chem>S=C=NC1CC2CCC1C2</chem>    |
| 18 | <b>10</b> {18}    | <chem>S=C=NCCSc1cccc1</chem>     |
| 19 | <b>10</b> {19}    | <chem>S=C=NCc1ccnc1</chem>       |
| 20 | <b>10</b> {20}    | <chem>CCN1CCCC1CN=C=S</chem>     |
| 21 | <b>10</b> {21}    | <chem>CC(C)(C)N=C=S</chem>       |
| 22 | <b>10</b> {22}    | <chem>S=C=NC1CCCC1</chem>        |
| 23 | <b>10</b> {23}    | <chem>CC(N=C=S)c1cccc1</chem>    |
| 24 | <b>10</b> {24}    | <chem>CCC(C)N=C=S</chem>         |
| 25 | <b>10</b> {25}    | <chem>S=C=NCC1CC1</chem>         |

|    |               |                           |
|----|---------------|---------------------------|
| 26 | <b>10{26}</b> | FC(F)(F)CN=C=S            |
| 27 | <b>10{27}</b> | CCOC(=O)N1CCC(CC1)N=C=S   |
| 28 | <b>10{28}</b> | CC(N=C=S)c1ccc(Br)cc1     |
| 29 | <b>10{29}</b> | S=C=NC1CCN(Cc2ccccc2)CC1  |
| 30 | <b>10{30}</b> | Clc1ccc(CCN=C=S)c(Cl)c1   |
| 31 | <b>10{31}</b> | CCOCCN=C=S                |
| 32 | <b>10{32}</b> | S=C=NCCc1cccn1            |
| 33 | <b>10{33}</b> | FC(F)(F)c1cccc(CN=C=S)c1  |
| 34 | <b>10{34}</b> | S=C=NCCc1ccc2OCCOc2c1     |
| 35 | <b>10{35}</b> | CS(=O)(=O)NCCN=C=S        |
| 36 | <b>10{36}</b> | S=C=NCC1CCC1              |
| 37 | <b>10{37}</b> | S=C=NCCc1cccn1            |
| 38 | <b>10{38}</b> | CC(N=C=S)c1cccs1          |
| 39 | <b>10{39}</b> | CS(=O)(=O)CCN=C=S         |
| 40 | <b>10{40}</b> | S=C=NC1CCOCC1             |
| 41 | <b>10{41}</b> | S=C=NCCc1cccs1            |
| 42 | <b>10{42}</b> | CC1(CC1)N=C=S             |
| 43 | <b>10{43}</b> | S=C=NC1CCOc2ccccc12       |
| 44 | <b>10{44}</b> | S=C=NC(C1CC1)C1CC1        |
| 45 | <b>10{45}</b> | FC(F)(F)Oc1ccc(CN=C=S)cc1 |
| 46 | <b>10{46}</b> | S=C=NC1CCc2ccccc2C1       |
| 47 | <b>10{47}</b> | CC(C)(C)CN=C=S            |
| 48 | <b>10{48}</b> | CSCCN=C=S                 |
| 49 | <b>10{49}</b> | CC(Cc1ccccc1)N=C=S        |
| 50 | <b>10{50}</b> | Brc1ccc(CN=C=S)cc1        |
| 51 | <b>10{51}</b> | S=C=NCC1CCOC1             |
| 52 | <b>10{52}</b> | S=C=NC1CCC1               |
| 53 | <b>10{53}</b> | Fc1ccc(CCN=C=S)cc1        |

|    |                |                               |
|----|----------------|-------------------------------|
| 54 | <b>10</b> {54} | <chem>S=C=NCC1CCCCO1</chem>   |
| 55 | <b>10</b> {55} | <chem>Cc1cc(CN=C=S)no1</chem> |
| 56 | <b>10</b> {56} | <chem>S=C=NCc1ccon1</chem>    |
| 57 | <b>10</b> {57} | <chem>FC(F)CN=C=S</chem>      |
| 58 | <b>10</b> {58} | <chem>CC1(CCC1)N=C=S</chem>   |

**Table S2.** SMILES strings for the reagents **11**.

| #  | Reagent <b>11</b> | SMILE                             |
|----|-------------------|-----------------------------------|
| 1  | <b>11</b> {1}     | Cl.CNS(=O)(=O)c1cccc2CNCCc12      |
| 2  | <b>11</b> {2}     | Cl.O=C(NC1CC1)C(=O)N1CCNCC1       |
| 3  | <b>11</b> {3}     | OC1(Cc2nc(no2)C2CC2)CCCNC1        |
| 4  | <b>11</b> {4}     | C1CC2(C1)CNCCO2                   |
| 5  | <b>11</b> {5}     | Cl.Fc1cc(F)cc(c1)C1COCCN1         |
| 6  | <b>11</b> {6}     | Fc1ccc2CNCCOe2c1                  |
| 7  | <b>11</b> {7}     | Cl.CC1=C(C)CNCC1                  |
| 8  | <b>11</b> {8}     | C1C[1C@@H]2NCC3(CCOCC3)[1C@@H]2C1 |
| 9  | <b>11</b> {9}     | Clc1ccc2[nH]c(nc2c1)C1CCCN1       |
| 10 | <b>11</b> {10}    | Cl.Cn1cccc1C(=O)N1CCNCC1          |
| 11 | <b>11</b> {11}    | Cl.CNC(=O)CNCc1cccc1              |
| 12 | <b>11</b> {12}    | Cn1cnnc1C1CCCNC1                  |
| 13 | <b>11</b> {13}    | C1CNC(C1)C1CCCO1                  |
| 14 | <b>11</b> {14}    | CC(CS(C)(=O)=O)NC1CC1             |
| 15 | <b>11</b> {15}    | Cl.COC1(CCNCC1)C(F)(F)F           |
| 16 | <b>11</b> {16}    | O=C1NCCN1C1CCCNC1                 |
| 17 | <b>11</b> {17}    | COCCNCCOC                         |
| 18 | <b>11</b> {18}    | NC(=O)[C@@H]1C[C@@H](F)CN1        |
| 19 | <b>11</b> {19}    | Cl.COC1(CCNCC1)C(F)(F)F           |
| 20 | <b>11</b> {20}    | CCC1(CCNCC1)N1CCOCC1              |
| 21 | <b>11</b> {21}    | Cl.CNC1CCN(CC1)S(C)(=O)=O         |
| 22 | <b>11</b> {22}    | Cl.Cl.C1CNCCC(C1)n1ccnn1          |
| 23 | <b>11</b> {23}    | C1CCc2ccccc2NC1                   |
| 24 | <b>11</b> {24}    | CC1(C)CNCCC(O)C1                  |
| 25 | <b>11</b> {25}    | C1CNC(C1)c1ccnc1                  |

|    |        |                                                 |
|----|--------|-------------------------------------------------|
| 26 | 11{26} | <chem>Clc1ccc2CNCCc2c1</chem>                   |
| 27 | 11{27} | <chem>C1CC(CCN1)c1ccnce1</chem>                 |
| 28 | 11{28} | <chem>Cl.COC1CCCNC1</chem>                      |
| 29 | 11{29} | <chem>Cc1ccc2CNCCc2c1</chem>                    |
| 30 | 11{30} | <chem>Cl.C1CC=CCN1</chem>                       |
| 31 | 11{31} | <chem>C1CC(CCN1)c1ccccc1</chem>                 |
| 32 | 11{32} | <chem>CC1NCCc2cccc(F)c12</chem>                 |
| 33 | 11{33} | <chem>Cl.O=C1CCNCCN1</chem>                     |
| 34 | 11{34} | <chem>CCC1NCCc2sccc12</chem>                    |
| 35 | 11{35} | <chem>C1CNCC(C1)c1ncc[nH]1</chem>               |
| 36 | 11{36} | <chem>Cl.O[C@H]1CCNC1</chem>                    |
| 37 | 11{37} | <chem>COc1ccc2CNCCc2c1</chem>                   |
| 38 | 11{38} | <chem>Cl.Cl.C1Cc2nc[nH]c2CN1</chem>             |
| 39 | 11{39} | <chem>Fc1ccc2NCCc2c1</chem>                     |
| 40 | 11{40} | <chem>Cl.Cl.C1Cc2[nH]ncc2CN1</chem>             |
| 41 | 11{41} | <chem>Cl.CNCc1ccc(OC)nc1</chem>                 |
| 42 | 11{42} | <chem>Cl.Cl.C1CNCC(C1)c1nnc2cccn12</chem>       |
| 43 | 11{43} | <chem>Cl.CN[C@H]1C[C@H](C1)C(N)=O</chem>        |
| 44 | 11{44} | <chem>Cl.O=c1[nH]c2cccc(N3CCNCC3)c2[nH]1</chem> |
| 45 | 11{45} | <chem>C(Cc1encn1)N1CCNCC1</chem>                |
| 46 | 11{46} | <chem>Cc1ccc(CNC2CC2)o1</chem>                  |
| 47 | 11{47} | <chem>Cl.CC12CNCC1(C)C(=O)NC2=O</chem>          |
| 48 | 11{48} | <chem>Cc1ccnc(c1)N1CCNCC1</chem>                |
| 49 | 11{49} | <chem>CNCCS(C)(=O)=O</chem>                     |
| 50 | 11{50} | <chem>CS(=O)(=O)NCC1CCCNC1</chem>               |
| 51 | 11{51} | <chem>CCNCC1CCOC1</chem>                        |
| 52 | 11{52} | <chem>C1CCN(CC1)C1CCNCC1</chem>                 |
| 53 | 11{53} | <chem>CNCCNC(C)=O</chem>                        |



|    |        |                             |
|----|--------|-----------------------------|
| 54 | 11{54} | C1CCC(CC1)N1CCNCC1          |
| 55 | 11{55} | CNCc1nccn1C                 |
| 56 | 11{56} | Cn1nccc1C1CCCNC1            |
| 57 | 11{57} | C1CNc2c[nH]nc2C1            |
| 58 | 11{58} | C[1C@@H]1CCNC[1C@H](C)O1    |
| 59 | 11{59} | Br.Oc1ccc2CNCc2c1           |
| 60 | 11{60} | Cl.O=C1CC2CCC(CN1)N2        |
| 61 | 11{61} | C1CC2(CN1)CCOCC2            |
| 62 | 11{62} | Cl.C1CC2NC1CC=C2            |
| 63 | 11{63} | Cl.O=C1NCC2CNCCN12          |
| 64 | 11{64} | Cl.FC1(F)CNCCOC1            |
| 65 | 11{65} | Cl.FC1=CCNC1                |
| 66 | 11{66} | Cl.C1NCC2C1C1OC2C=C1        |
| 67 | 11{67} | Cl.OCC1CC2CCC1N2            |
| 68 | 11{68} | C1CNCC(C1)c1ccn[nH]1        |
| 69 | 11{69} | CNCC(C)(C)CO                |
| 70 | 11{70} | COc1cccc(c1)C1CCNCC1        |
| 71 | 11{71} | CCn1cc(CNC)cn1              |
| 72 | 11{72} | CCNCc1ccoc1                 |
| 73 | 11{73} | C1Cc2cn[nH]c2CN1            |
| 74 | 11{74} | Cc1nc(sc1C)N1CCNCC1         |
| 75 | 11{75} | Cl.Oc1cccc(c1)C(=O)N1CCNCC1 |
| 76 | 11{76} | C1Cn2ccnc2N1                |
| 77 | 11{77} | C1CC1c1ncc2CNCCc2n1         |
| 78 | 11{78} | Cl.COc1ccc2CNCCCc2c1        |
| 79 | 11{79} | Cl.NC(=O)[C@H]1CCCN1        |
| 80 | 11{80} | Cl.C(OC1CCNCC1)C1CCCO1      |
| 81 | 11{81} | NC(=O)C1CNCCO1              |

|     |         |                             |
|-----|---------|-----------------------------|
| 82  | 11{82}  | C1CCC2(C1)CCNC2             |
| 83  | 11{83}  | CNC1CCCc2nc(C)sc12          |
| 84  | 11{84}  | Cl.CNCC(=O)N1CCCC1          |
| 85  | 11{85}  | Fc1cccc(c1)N1CCNCC1         |
| 86  | 11{86}  | OCC1CCCCCN1                 |
| 87  | 11{87}  | CNCc1ccoc1C                 |
| 88  | 11{88}  | C(C1CCOCC1)N1CCNCC1         |
| 89  | 11{89}  | CNC(C)c1ccccn1              |
| 90  | 11{90}  | C(N1CCNCC1)c1cscn1          |
| 91  | 11{91}  | CC1NCCOc2cccc12             |
| 92  | 11{92}  | C1CNCC(C1)c1cccc1           |
| 93  | 11{93}  | C(C1CCCCC1)N1CCNCC1         |
| 94  | 11{94}  | CNc1c(C)noc1C               |
| 95  | 11{95}  | CNC(C)c1sc(C)nc1C           |
| 96  | 11{96}  | CC(C)OC1CCNCC1              |
| 97  | 11{97}  | Cl.O=C(NC1CC1)C1CCCN1       |
| 98  | 11{98}  | CNC(C)c1ccco1               |
| 99  | 11{99}  | C1Cn2encc2CN1               |
| 100 | 11{100} | Cl.O=S1CCNCC1               |
| 101 | 11{101} | Cl.CNCc1ccc(C)s1            |
| 102 | 11{102} | CNCc1senc1C                 |
| 103 | 11{103} | Cl.Cc1ccc2[nH]c3CCNCCc3c2c1 |
| 104 | 11{104} | C1CCC2(C1)CNCCOC2           |
| 105 | 11{105} | CN1CCNCCc2cccc12            |
| 106 | 11{106} | C1Cc2cccc2CCN1              |
| 107 | 11{107} | Cl.Fc1ccc(F)c2CNCCc12       |
| 108 | 11{108} | O=C1CCCN1C1CCNCC1           |
| 109 | 11{109} | Cl.Cn1nc2CCNCCc2cc1=O       |

|     |         |                                     |
|-----|---------|-------------------------------------|
| 110 | 11{110} | Cl.CNCC1(O)CCOCC1                   |
| 111 | 11{111} | Cl.CC1CNCC(C)S1(=O)=O               |
| 112 | 11{112} | Cl.CCOC1(C)CCNCC1                   |
| 113 | 11{113} | FC(F)(F)CN1CNCC1=O                  |
| 114 | 11{114} | Cl.CS(=O)(=O)C1CCCNCC1              |
| 115 | 11{115} | Cl.O=C1Nc2ccccc2C11CCNC1            |
| 116 | 11{116} | Cl.O[1C@@H]1CC[1C@@H]2CNC[1C@@H]2C1 |
| 117 | 11{117} | CC(C)(CC1CCCNCC1)C(N)=O             |
| 118 | 11{118} | Cl.C[1C@@H]1NCC[1C@@H]1O            |
| 119 | 11{119} | Cl.CCNC1CCNC1=O                     |
| 120 | 11{120} | Cl.Cl.CN1CCNCC1CO                   |
| 121 | 11{121} | I.I.Cc1nnc(N2CCNCC2)n1C             |
| 122 | 11{122} | CCNCCO                              |
| 123 | 11{123} | Cl.CC(C)(C)C1CNCCO1                 |
| 124 | 11{124} | Cl.Cl.Cc1cc(=O)[nH]c(n1)N1CCNCC1    |
| 125 | 11{125} | CNCC1(O)CCCC1                       |
| 126 | 11{126} | C(N1CCNCC1)c1nc[nH]n1               |
| 127 | 11{127} | Cl.NC(=O)[C@@H]1CCCN1               |
| 128 | 11{128} | Cl.C1CC1C1CCCNCC1                   |
| 129 | 11{129} | Cl.CNC[C@@H](C)O                    |
| 130 | 11{130} | Cl.CCC1CCCN1                        |
| 131 | 11{131} | Cl.OCC1NCC=C1                       |
| 132 | 11{132} | Cl.CC(C)(C)C1=CCNCC1                |
| 133 | 11{133} | Cl.CC1(C)CCCN1                      |
| 134 | 11{134} | Cl.CN(C)C(=O)NC1CCCNCC1             |
| 135 | 11{135} | Cl.FC(F)(F)[C@@H]1CCCNCC1           |
| 136 | 11{136} | Cl.CC(C)NC(=O)[C@@H]1CCCNCC1        |
| 137 | 11{137} | CCN1CCC2CCC(C1)N2                   |

|     |         |                           |
|-----|---------|---------------------------|
| 138 | 11{138} | Clc1cccc2CCNCc12          |
| 139 | 11{139} | Fc1cccc2CCNc12            |
| 140 | 11{140} | Cl.CNc1cnn(C)c1           |
| 141 | 11{141} | Cl.O=C1CC2(CN1)CCNCC2     |
| 142 | 11{142} | C1CC(CCN1)c1cn[nH]c1      |
| 143 | 11{143} | Cl.CNc1cnn(C)n1           |
| 144 | 11{144} | C1CN2CCOCC2CN1            |
| 145 | 11{145} | Cc1cccc2CCNCc12           |
| 146 | 11{146} | Cl.Cl.C1CNC(C1)c1cnn[nH]1 |
| 147 | 11{147} | Clc1cnn(c1)C1CCNC1        |
| 148 | 11{148} | Cc1esc(n1)C1CCNC1         |
| 149 | 11{149} | C1CNC(C1)c1ccncc1         |
| 150 | 11{150} | CC1CNCC(=O)N1             |
| 151 | 11{151} | Cl.CC1CNCCOC1             |
| 152 | 11{152} | Cl.FC1CCNCC1              |
| 153 | 11{153} | CN(C)C1CCNC1              |
| 154 | 11{154} | Cl.FC1(CCNCC1)C1CC1       |
| 155 | 11{155} | Cl.Clc1cccc2NCCc12        |
| 156 | 11{156} | Cl.FC(F)(F)[C@H]1CCCNC1   |
| 157 | 11{157} | Cl.CC1(F)CCCNC1           |
| 158 | 11{158} | Cl.FC(F)C1CCNCC1          |
| 159 | 11{159} | Cl.Fc1cccc2NCCc12         |
| 160 | 11{160} | Cl.C1CCC2(C1)CCNCC2       |
| 161 | 11{161} | CNC(C)c1ccncc1            |
| 162 | 11{162} | Cl.C1Cc2nnc(C3CCCNC3)n2C1 |
| 163 | 11{163} | Cc1cccc(n1)C1CCCN1        |
| 164 | 11{164} | C1C[C@H](CN1)Oc1cccc1     |
| 165 | 11{165} | C(C1CCNCC1)N1CCOCC1       |

|     |         |                           |
|-----|---------|---------------------------|
| 166 | 11{166} | Cl.OC1CCOC2(CCNCC2)C1     |
| 167 | 11{167} | Cl.Cl.C1CNC(C1)c1ncccn1   |
| 168 | 11{168} | C1COC(CN1)c1ccco1         |
| 169 | 11{169} | Cl.C1CC2(C1)CCNC2         |
| 170 | 11{170} | C1CNCC(C1)C1CCOCC1        |
| 171 | 11{171} | C1CC(CN1)n1cccn1          |
| 172 | 11{172} | Cl.COC1CCCNCC1            |
| 173 | 11{173} | Cl.O=C1CNCCCN1            |
| 174 | 11{174} | Cl.FC(F)[C@@H]1CCCN1      |
| 175 | 11{175} | Cn1ccc(n1)C1CCCN1         |
| 176 | 11{176} | CNCc1enc(C)s1             |
| 177 | 11{177} | CC(C)C(=O)N1CCCNCC1       |
| 178 | 11{178} | CNCc1ccoc1                |
| 179 | 11{179} | OC[C@H]1[C@@H]2CNC[C@H]12 |
| 180 | 11{180} | CNC(C)c1cccc(Cl)c1        |
| 181 | 11{181} | CNc1cccc(C)c1             |
| 182 | 11{182} | Cl.CNCc1ccc(C)c(C)c1      |
| 183 | 11{183} | Cl.CC1(Cc2cccc2)CCCN1     |
| 184 | 11{184} | Cl.COC1(CCCNC1)C(F)(F)F   |
| 185 | 11{185} | CC1(C)CNC1c1ccenc1        |
| 186 | 11{186} | Cl.CCn1ccc(CNC)c1         |
| 187 | 11{187} | OC1(CCNC1)C1CC1           |
| 188 | 11{188} | CCOC1CC2(C1)CCNC2         |
| 189 | 11{189} | Cc1cccc(C2CCCN2)c1C       |
| 190 | 11{190} | CC1(C)CNCc2cccc2O1        |
| 191 | 11{191} | CC1(C)CNCC(O1)C(F)(F)F    |
| 192 | 11{192} | CNCc1cccc(C)n1            |
| 193 | 11{193} | Cl.COc1cccc1C1CCNC1       |

|     |         |                              |
|-----|---------|------------------------------|
| 194 | 11{194} | Cl.O=S1(=O)CCNCc2ccccc12     |
| 195 | 11{195} | Cl.CCS(=O)(=O)C1CNC1         |
| 196 | 11{196} | Cl.CNc1ccc(OC(C)C)cc1        |
| 197 | 11{197} | Cl.CC1CNC(C)(C)C1            |
| 198 | 11{198} | CC(C)c1cc([nH]n1)C1CCCNC1    |
| 199 | 11{199} | CNCc1nnc2CCcn12              |
| 200 | 11{200} | CNCc1cc2ccccc2[nH]1          |
| 201 | 11{201} | CC1CNc2ccccc2O1              |
| 202 | 11{202} | C1CC1c1nc(n[nH]1)C1CCCNC1    |
| 203 | 11{203} | Cl.Cl.Cc1nc([nH]c1C)C1CCNCC1 |
| 204 | 11{204} | CNCC1(O)CCC1                 |
| 205 | 11{205} | Cl.OC1CCNCC1(F)F             |
| 206 | 11{206} | CC1(C)CNC1c1ccncc1           |
| 207 | 11{207} | Cl.Cl.C1CC(CCN1)n1ccn1       |
| 208 | 11{208} | C1CN(CCN1)C1CCOCC1           |
| 209 | 11{209} | CO[1C@@H]1CNC[1C@H]1O        |
| 210 | 11{210} | Br.Oc1cccc2CNCCc12           |
| 211 | 11{211} | C1CC(CCN1)c1ccco1            |
| 212 | 11{212} | Cl.FC(F)(F)C1CCNCCO1         |
| 213 | 11{213} | Cl.CNC(=O)NC1CCNCC1          |
| 214 | 11{214} | C1CCC(OC1)C1CCNCC1           |
| 215 | 11{215} | Cl.CCS(=O)(=O)CC(C)NC        |
| 216 | 11{216} | CN[1C@H]1CCC[1C@@H]1O        |
| 217 | 11{217} | Cl.Oc1ccc2CNCCOc2c1          |
| 218 | 11{218} | Cc1cncc(c1)C1CCCN1           |
| 219 | 11{219} | C1CN(CCN1)c1cccs1            |
| 220 | 11{220} | Cl.CC1CCS(=O)(=O)CCN1        |
| 221 | 11{221} | Cl.Cl.C1CNCC(C1)c1ccncc1     |

|     |         |                                   |
|-----|---------|-----------------------------------|
| 222 | 11{222} | Cl.Cl.C1CNCC(C1)c1cnc1            |
| 223 | 11{223} | CNCc1nnc(C)s1                     |
| 224 | 11{224} | CNCC(C)C(=O)NC                    |
| 225 | 11{225} | Cl.O=S(=O)(C1CC1)N1CCNCC1         |
| 226 | 11{226} | Cl.OCCNC(=O)C1CCNCC1              |
| 227 | 11{227} | COc1ccc(cc1F)C1CCNC1              |
| 228 | 11{228} | CC(C)(O)CNC1CC1                   |
| 229 | 11{229} | OCC1(CCNC1)c1cccc1                |
| 230 | 11{230} | CN(C1CCNC1)c1cccc1                |
| 231 | 11{231} | Cl.NC(=O)COC1CCNCC1               |
| 232 | 11{232} | CCNCc1occc1C                      |
| 233 | 11{233} | Br1cnc(c1)C1CCCN1                 |
| 234 | 11{234} | Cl.CS(=O)(=O)CC1CCNCC1            |
| 235 | 11{235} | CNCc1esen1                        |
| 236 | 11{236} | Oc1ccc2CCNCc2c1                   |
| 237 | 11{237} | CNCc1occc1C                       |
| 238 | 11{238} | Cl.Clc1cnn(c1)C1CCNCC1            |
| 239 | 11{239} | Cl.C1NC2CC1C=C2                   |
| 240 | 11{240} | Cl.CC(=O)NC1CCNCC1                |
| 241 | 11{241} | Cc1cnn(c1)C1CCNC1                 |
| 242 | 11{242} | CCNc1cnn(C)c1                     |
| 243 | 11{243} | Cl.Cl.Cn1cc(en1)C1=CCCNC1         |
| 244 | 11{244} | Cl.Cl.CN1CC[1C@@H]2CC[1C@H](C1)N2 |
| 245 | 11{245} | C[C@H]1COCCN1                     |
| 246 | 11{246} | Cl.N#CC1CCCNC1                    |
| 247 | 11{247} | Br.CNCc1cccc(=O)[nH]1             |
| 248 | 11{248} | Cl.Cl.C1CN[C@@H](C1)c1cnn[nH]1    |
| 249 | 11{249} | Cl.COC[C@H]1C[C@@H](O)CN1         |

|     |         |                                 |
|-----|---------|---------------------------------|
| 250 | 11{250} | Cl.CC(C)[C@H]1CNCCN1C           |
| 251 | 11{251} | CN1CCNCc2ccnc12                 |
| 252 | 11{252} | Cl.NC(=O)C1NCCc2ccccc12         |
| 253 | 11{253} | Cl.CC1CCNCCS1(=O)=O             |
| 254 | 11{254} | Cl.O[1C@@H]1CNC[1C@H]1Oc1ccccc1 |
| 255 | 11{255} | Cl.CC1CNCCS(=O)(=O)C1           |
| 256 | 11{256} | CC1(C)CN[1C@@H]2COC[1C@H]12     |
| 257 | 11{257} | Cl.Cl.C1CC(CCN1)c1nnc[nH]1      |
| 258 | 11{258} | C1CC(CCN1)c1ncc[nH]1            |
| 259 | 11{259} | CC1CNCCN(C1)C1CC1               |
| 260 | 11{260} | C1CC(CN1)N1CCCC1                |
| 261 | 11{261} | C1COC(C1)C1CCNCC1               |
| 262 | 11{262} | CNC1CCN(C1)C(C)C                |
| 263 | 11{263} | CCc1cccc(NC)c1                  |
| 264 | 11{264} | CC1NCCc2ccccc12                 |
| 265 | 11{265} | Cn1cc(CC2CCNC2)cn1              |
| 266 | 11{266} | Cl.Fc1cccc(OC2CCNCC2)c1         |
| 267 | 11{267} | CNC(C)c1ccncc1                  |
| 268 | 11{268} | Cl.C1CNCCc2ccsc2C1              |
| 269 | 11{269} | Clc1cccc(c1)C1CCCN1             |
| 270 | 11{270} | CNC1Cc2ccccc2C1                 |
| 271 | 11{271} | CNC(C)c1ccccc1F                 |
| 272 | 11{272} | Cl.Cl.C1CNCC(C1)c1cccn1         |
| 273 | 11{273} | Cl.CCNCC(N)=O                   |
| 274 | 11{274} | C(C1CCNC1)N1CCCC1               |
| 275 | 11{275} | C(C1CCNCC1)c1ccncc1             |
| 276 | 11{276} | CC1CNCCN1CC(C)(C)O              |
| 277 | 11{277} | Cl.OCC1(CCNC1)C(F)(F)F          |



|     |         |                                            |
|-----|---------|--------------------------------------------|
| 278 | 11{278} | C1CC2(CCOC2)CN1                            |
| 279 | 11{279} | Cc1enc(OC2CCNCC2)nc1                       |
| 280 | 11{280} | Fc1ccnc1N1CCCNCC1                          |
| 281 | 11{281} | C(OC1CCNCC1)C1CC1                          |
| 282 | 11{282} | CC(=O)N1CCNCC11CCCCC1                      |
| 283 | 11{283} | Cl.C1CC2(C1)CNCc1cccc1O2                   |
| 284 | 11{284} | CC1(C)CNCCO1                               |
| 285 | 11{285} | Cl.Cc1nc(no1)C1CC2CCC(C1)N2                |
| 286 | 11{286} | Cl.C1OC2(CCNCC2)c2cccc12                   |
| 287 | 11{287} | O=C(N1CCNCC1)c1cccc1                       |
| 288 | 11{288} | CC(=O)N1CCCNCC1                            |
| 289 | 11{289} | C1CC(CCN1)c1nc2cccc2s1                     |
| 290 | 11{290} | CC1CNCCN1C(=O)OC(C)(C)C                    |
| 291 | 11{291} | Fc1ccc(cc1)C(=O)N1CCNCC1                   |
| 292 | 11{292} | C[C@H]1CNCCN1C(=O)OC(C)(C)C                |
| 293 | 11{293} | Cl.C1C[C@@H]2C[C@@H](C[C@H]1N2)c1cccc<br>1 |
| 294 | 11{294} | Cl.Clc1cccc1N1CCNCC1                       |
| 295 | 11{295} | O=C(OCc1cccc1)N1CCNCC1                     |
| 296 | 11{296} | C[C@@H]1CNCCN1C(=O)OC(C)(C)C               |
| 297 | 11{297} | CC1(OCCO1)C1CCNCC1                         |
| 298 | 11{298} | CC1(OCCO1)C1CCCNC1                         |
| 299 | 11{299} | COC1(CO)CCNCC1                             |
| 300 | 11{300} | C1CNCCOC1                                  |
| 301 | 11{301} | FC(F)CN1CCNCC1                             |
| 302 | 11{302} | CNCCOc1ccc(F)cc1                           |
| 303 | 11{303} | CC1CCCNC1C                                 |
| 304 | 11{304} | CC(C)C(=O)NCC1CCCNC1                       |
| 305 | 11{305} | CC1CCCNCC1                                 |

|     |         |                                      |
|-----|---------|--------------------------------------|
| 306 | 11{306} | CC(C)(C)OC(=O)NCC1CCCNC1             |
| 307 | 11{307} | CN(CC1CCNC1)C(=O)OC(C)(C)C           |
| 308 | 11{308} | CC(C)(C)OC(=O)NCC1CCNCC1             |
| 309 | 11{309} | O=c1[nH]c2ccccc2n1C1CCNCC1           |
| 310 | 11{310} | CC1CNCCC1NC(=O)OC(C)(C)C             |
| 311 | 11{311} | CC(C)(C)OC(=O)N[C@H]1CCCNC1          |
| 312 | 11{312} | CC(C)(C)OC(=O)NC1CCCNC1              |
| 313 | 11{313} | CC(C)(C)OC(=O)N1C[C@@H]2CNC[C@@H]2C1 |
| 314 | 11{314} | CC(C)(C)OC(=O)N1CCCNCC1              |
| 315 | 11{315} | CC(C)(C)OC(=O)N1C[C@@H]2C[C@H]1CN2   |
| 316 | 11{316} | Fe1cccc(F)c1N1CCNCC1                 |
| 317 | 11{317} | CNCc1ccc(C)o1                        |
| 318 | 11{318} | C1Cn2c(CN1)nnc2-c1cccc1              |
| 319 | 11{319} | CNCC1COCCO1                          |
| 320 | 11{320} | COC(=O)C1CCNCC1                      |
| 321 | 11{321} | OCC1CCNCC1                           |
| 322 | 11{322} | CNC1CC1                              |
| 323 | 11{323} | Cl.O=C1CNCc2ccccc2N1                 |
| 324 | 11{324} | Cl.Cc1noc(n1)C1CCNCC1                |
| 325 | 11{325} | Cl.O=c1[nH]ncn1C1CCNCC1              |
| 326 | 11{326} | Cl.FC(F)(F)C1=CCNCC1                 |
| 327 | 11{327} | C1CNC(C1)c1ccsc1                     |
| 328 | 11{328} | C1COCCN1                             |
| 329 | 11{329} | Cl.FC(F)C1CCNCCO1                    |
| 330 | 11{330} | Cl.CNC1CCCCN(C)C1=O                  |
| 331 | 11{331} | Cl.C1CC11CC2CCC(C1)N2                |
| 332 | 11{332} | Cl.CC1(CNCCO1)C(F)F                  |
| 333 | 11{333} | CC1(C)CNCCS1                         |

|     |         |                                 |
|-----|---------|---------------------------------|
| 334 | 11{334} | Cn1cnc1N1CCNCC1                 |
| 335 | 11{335} | O=C1NC(=O)[C@@H]2CNC[C@H]12     |
| 336 | 11{336} | Cl.CS(=O)(=O)C1CCNCC1           |
| 337 | 11{337} | CNCC1CCOC1                      |
| 338 | 11{338} | CCC1CNCC(CC)O1                  |
| 339 | 11{339} | CNCc1cccc(F)c1                  |
| 340 | 11{340} | C1CCCNCC1                       |
| 341 | 11{341} | C1CCNC1                         |
| 342 | 11{342} | CC1CCCN1                        |
| 343 | 11{343} | C(N1CCNCC1)c1cccc1              |
| 344 | 11{344} | O=C(C1CC1)N1CCNC1               |
| 345 | 11{345} | C1CCCNCCC1                      |
| 346 | 11{346} | CCNC                            |
| 347 | 11{347} | C1CCCNCCC1                      |
| 348 | 11{348} | CC(C)C1CNCCCO1                  |
| 349 | 11{349} | C#CCC1CCNC1                     |
| 350 | 11{350} | CNCCC=C                         |
| 351 | 11{351} | CCN1CCNCC1=O                    |
| 352 | 11{352} | Cl.C(C1CCNCC1)n1cenn1           |
| 353 | 11{353} | Cl.OCC1(O)CCNCC1                |
| 354 | 11{354} | CC1NCN(C)C1=O                   |
| 355 | 11{355} | CNCc1cnn(C)c1                   |
| 356 | 11{356} | CNCC1CCC1                       |
| 357 | 11{357} | COc1cccc1N1CCNCC1               |
| 358 | 11{358} | CC(C)(C)OC(=O)NCC1CCNC1         |
| 359 | 11{359} | O=c1cccc2[C@H]3CNC[C@H](C3)Cn12 |
| 360 | 11{360} | CC(C)(C)OC(=O)NC1CCNCC1         |
| 361 | 11{361} | CC(C)(C)OC(=O)N1CCNCC1          |

|     |         |                             |
|-----|---------|-----------------------------|
| 362 | 11{362} | Cl.O[C@@H]1CCCNC1           |
| 363 | 11{363} | COCC1(C)CNCCO1              |
| 364 | 11{364} | CNCC1(C)COC1                |
| 365 | 11{365} | CC1CC(CN1)c1ccc(C)cc1       |
| 366 | 11{366} | CNCC(C)(C)O                 |
| 367 | 11{367} | Cl.CNCC(=O)N1CCOCC1         |
| 368 | 11{368} | CS(=O)(=O)C1CCCNC1          |
| 369 | 11{369} | CC1CNCCO1                   |
| 370 | 11{370} | CNCC1CCCOC1                 |
| 371 | 11{371} | C1CC2(CNCCO2)c2ccccc12      |
| 372 | 11{372} | Cl.C[1C@@H]1CNC[1C@H](O)C1  |
| 373 | 11{373} | Cl.CC(C)NC(=O)[C@H]1CCCNC1  |
| 374 | 11{374} | Cc1noc(n1)C1CCNC1           |
| 375 | 11{375} | C1CN(CCN1)c1ncccn1          |
| 376 | 11{376} | COCC(=O)N1CCNCC1            |
| 377 | 11{377} | Cl.Fc1cccc2OCCNCc12         |
| 378 | 11{378} | Cc1ccc(C)n1C1CCNCC1         |
| 379 | 11{379} | Cl.OC1(CCCNCC1)C(F)(F)F     |
| 380 | 11{380} | Cl.CNS(=O)(=O)N1CCNCC1      |
| 381 | 11{381} | Cl.COc1ccc2OCCNCc2c1        |
| 382 | 11{382} | C1CNCC(C1)NC1CCOCC1         |
| 383 | 11{383} | Cl.C[C@@H]1CNCCN1S(C)(=O)=O |
| 384 | 11{384} | Cl.Cl.O=C1CCCCN1C1CCCNC1    |
| 385 | 11{385} | Cl.CNCc1nc(C)no1            |
| 386 | 11{386} | CNCc1ccc(F)cc1              |
| 387 | 11{387} | C(C1CCNCC1)c1ccccc1         |
| 388 | 11{388} | CNCc1ccc(Cl)s1              |
| 389 | 11{389} | Cl.CNCc1cccs1               |

|     |         |                               |
|-----|---------|-------------------------------|
| 390 | 11{390} | Cl.CS(=O)(=O)N1CCNCC1         |
| 391 | 11{391} | CNCC1CC1                      |
| 392 | 11{392} | CC1CNCC2(CCC2)O1              |
| 393 | 11{393} | C1CC2(C1)CNCCOC2              |
| 394 | 11{394} | C1CCC2(C1)CNCCO2              |
| 395 | 11{395} | C1CC2(CO1)CNCCO2              |
| 396 | 11{396} | CNCCOC                        |
| 397 | 11{397} | CSC1CCCCNC1                   |
| 398 | 11{398} | CC1CNCC(C)O1                  |
| 399 | 11{399} | Cl.COCC1(C)CCNC1              |
| 400 | 11{400} | CNC1CCS(=O)(=O)C1             |
| 401 | 11{401} | NC(=O)C1CCNCC1                |
| 402 | 11{402} | CC1CNCC2(CCCCC2)O1            |
| 403 | 11{403} | Cl.CC12CCNCC1C2(Cl)Cl         |
| 404 | 11{404} | COC(=O)[1C@]12CNC[1C@H]1CCCC2 |
| 405 | 11{405} | C1CCC2(CC1)CCCNC2             |
| 406 | 11{406} | CC1CCNCC11CCC1                |
| 407 | 11{407} | C1CC2(CN1)CCCCC2              |
| 408 | 11{408} | C1CCC2(C1)CCCNC2              |
| 409 | 11{409} | C1CCC2(CC1)CNCCS2             |
| 410 | 11{410} | Cl.C1CCC2(CC1)CCNCC2          |
| 411 | 11{411} | CCC1CCCNC1                    |
| 412 | 11{412} | CONCC1CC2CCC1C2               |
| 413 | 11{413} | CC1CNCC2(CCCC2)O1             |
| 414 | 11{414} | CNCc1nccs1                    |
| 415 | 11{415} | CNC[C@H]1CCCO1                |
| 416 | 11{416} | C1CNCCc2cccc2C1               |
| 417 | 11{417} | COc1cccc2CCNCc12              |

|     |         |                                          |
|-----|---------|------------------------------------------|
| 418 | 11{418} | Cl.FC1(F)CNCc2ccccc12                    |
| 419 | 11{419} | FC1(F)CC11CC2CCC(C1)N2                   |
| 420 | 11{420} | C1COC(CN1)c1ccccc1                       |
| 421 | 11{421} | C1CC2(CN1)OCc1ccccc21                    |
| 422 | 11{422} | NC(=O)CC1CCNCC1                          |
| 423 | 11{423} | O=C1CNCCN1                               |
| 424 | 11{424} | OC1CCCNC1                                |
| 425 | 11{425} | Cl.COCC1=CCNCC1                          |
| 426 | 11{426} | Cl.COC(=O)C1CC11CCNCC1                   |
| 427 | 11{427} | Cl.CN1CCC2(CCNCC2)C1=O                   |
| 428 | 11{428} | O=C1NCCC2(CCNCC2)O1                      |
| 429 | 11{429} | C1CC2(CCO1)CCNCCO2                       |
| 430 | 11{430} | CCOC(=O)[1C@@H]1[1C@@H]2CCNC[1C@H]1<br>2 |
| 431 | 11{431} | C1CC2(CS1)CNCCO2                         |
| 432 | 11{432} | C1CC2(CCO1)CNCCOC2                       |
| 433 | 11{433} | CC1CNCC2(CCOCC2)O1                       |
| 434 | 11{434} | C1COC2(CCOCC2)CN1                        |
| 435 | 11{435} | COC(=O)[1C@]12CNC[1C@H]1COCC2            |
| 436 | 11{436} | COC(=O)[1C@]12CCC[1C@H]1NCC2             |
| 437 | 11{437} | Cl.CCS(=O)(=O)N1CCNCC1                   |
| 438 | 11{438} | NC(=O)[1C@]12CCC[1C@H]1CNCC2             |
| 439 | 11{439} | CNC1CCCCC1                               |
| 440 | 11{440} | CNC(C)CC#N                               |
| 441 | 11{441} | Cl.CC1(C)CCNCCS1=O                       |
| 442 | 11{442} | Cc1cccc(c1)C1CCNC1                       |
| 443 | 11{443} | C[C@H]1CNC[C@@H](C)O1                    |
| 444 | 11{444} | COc1ccc(cc1)C1CNCCO1                     |
| 445 | 11{445} | Cl.COc1cc2CCNCc2cc1OC                    |

|     |         |                                              |
|-----|---------|----------------------------------------------|
| 446 | 11{446} | COC(=O)[1C@@H]1CNC[1C@H]1C                   |
| 447 | 11{447} | C1Cc2ccccc2CN1                               |
| 448 | 11{448} | CCOC(=O)C1CCNCC1                             |
| 449 | 11{449} | CC1(C)CNCC(C)(C)O1                           |
| 450 | 11{450} | C1CN(CCN1)c1ccccc1                           |
| 451 | 11{451} | CCOC(=O)N1CCNCC1                             |
| 452 | 11{452} | CCOC(=O)[C@@H]1CCCNC1                        |
| 453 | 11{453} | CCOC(=O)C1CCCNC1                             |
| 454 | 11{454} | CC1OCCC11CNCC(C)O1                           |
| 455 | 11{455} | CC1OCCC11CNCCO1                              |
| 456 | 11{456} | C1COC2(CCNCC2)OC1                            |
| 457 | 11{457} | CCc1ncc2C3CCC(Cc2n1)N3                       |
| 458 | 11{458} | CO[1C@@H]1CS(=O)(=O)[1C@H]2CNC[1C@@H]<br>]12 |
| 459 | 11{459} | CCNCC                                        |
| 460 | 11{460} | Fc1ccc(cc1)N1CCNCC1                          |
| 461 | 11{461} | Cc1ccc(cc1)N1CCNCC1                          |
| 462 | 11{462} | Cc1ccccc1N1CCNCC1                            |
| 463 | 11{463} | Cc1ccc(cc1C)N1CCNCC1                         |
| 464 | 11{464} | Cc1cccc(c1)N1CCNCC1                          |
| 465 | 11{465} | CC1CCNCC1C                                   |
| 466 | 11{466} | C1CNCC2(C1)Oc1ccccc1C=C2                     |
| 467 | 11{467} | FC(F)(F)CC1CC2CCC(C1)N2                      |
| 468 | 11{468} | NC(=O)[1C@@H]1CCO[1C@H]1C1CCNCC1             |
| 469 | 11{469} | CC1CSCCN1                                    |
| 470 | 11{470} | CC(C)(C)OC(=O)NC1CCNC1                       |
| 471 | 11{471} | CC(C)(C)OC(=O)N[C@H]1CCNC1                   |
| 472 | 11{472} | CC(C)(C)OC(=O)N[C@@H]1CCNC1                  |
| 473 | 11{473} | CCO[C@H]1CCNC1                               |

|     |         |                                     |
|-----|---------|-------------------------------------|
| 474 | 11{474} | CSC1CCNC1                           |
| 475 | 11{475} | C1CSCCN1                            |
| 476 | 11{476} | FC1(F)CCNCC1                        |
| 477 | 11{477} | COCC1CCCNC1                         |
| 478 | 11{478} | C1CCNCC1                            |
| 479 | 11{479} | CC1CCCNC1                           |
| 480 | 11{480} | CC1CCNCC1                           |
| 481 | 11{481} | C1NC[C@@H]2CC=CC[C@H]12             |
| 482 | 11{482} | C1CC2(CN1)OCCO2                     |
| 483 | 11{483} | C1CC2CC1CNC2                        |
| 484 | 11{484} | CC1CCNCC11CCCCC1                    |
| 485 | 11{485} | C1CCC2(CC1)CCCNCC2                  |
| 486 | 11{486} | CC(C)(C)OC(=O)N1C2CCC1CNC2          |
| 487 | 11{487} | CC(C)(C)OC(=O)N1CC2CCC(C1)N2        |
| 488 | 11{488} | CC(C)(C)OC(=O)[1C@]12CNC[1C@H]1COC2 |
| 489 | 11{489} | CC(C)(C)OC(=O)NCC12CC(C1)CN2        |
| 490 | 11{490} | CC(O)C1CCNCC1                       |
| 491 | 11{491} | C1CCN(C1)C1CCNC1                    |
| 492 | 11{492} | CNCC(C)(O)c1cccc1                   |
| 493 | 11{493} | CC1CC2CCC(C1)N2                     |
| 494 | 11{494} | COCC1CNCCO1                         |
| 495 | 11{495} | CC(=O)NCC1CNCCO1                    |
| 496 | 11{496} | CNC(C)C#C                           |
| 497 | 11{497} | Cl.O=C1NC(=O)N2CCNCC12              |
| 498 | 11{498} | Fc1cccc1N1CCNCC1                    |
| 499 | 11{499} | C1CC11CCCNCC1                       |
| 500 | 11{500} | C1CNCC(C1)c1cc2cccc2[nH]1           |
| 501 | 11{501} | CCNCC(C)=C                          |



|     |                |                                   |
|-----|----------------|-----------------------------------|
| 502 | <b>11{502}</b> | <chem>C1CC2(CN1)Oc1cccc1O2</chem> |
| 503 | <b>11{503}</b> | <chem>C1C2CNCCCN2c2cccc12</chem>  |
| 504 | <b>11{504}</b> | <chem>O=C1CNCCN1C1CC1</chem>      |
| 505 | <b>11{505}</b> | <chem>CC1CNCC(C)C1</chem>         |
| 506 | <b>11{506}</b> | <chem>CNCC=C</chem>               |
| 507 | <b>11{507}</b> | <chem>Cl.OC1(CCNC1)C(F)F</chem>   |
| 508 | <b>11{508}</b> | <chem>C1OCC11CCNC1</chem>         |
| 509 | <b>11{509}</b> | <chem>Cl.C1CC2CCC1N2</chem>       |
| 510 | <b>11{510}</b> | <chem>Cl.C1C2CNCC12</chem>        |
| 511 | <b>11{511}</b> | <chem>Cl.CN(C)C(=O)C1CCNC1</chem> |

**Table S3.** SMILES strings for the reagents **15**.

| #  | Reagent <b>15</b> | SMILE                            |
|----|-------------------|----------------------------------|
| 1  | <b>15</b> {1}     | <chem>CC(C)N</chem>              |
| 2  | <b>15</b> {2}     | <chem>NCc1ccco1</chem>           |
| 3  | <b>15</b> {3}     | <chem>NCc1ccc2OCOc2c1</chem>     |
| 4  | <b>15</b> {4}     | <chem>COCCN</chem>               |
| 5  | <b>15</b> {5}     | <chem>CCCCCN</chem>              |
| 6  | <b>15</b> {6}     | <chem>NCc1ccc(Cl)cc1</chem>      |
| 7  | <b>15</b> {7}     | <chem>NCc1ccccc1</chem>          |
| 8  | <b>15</b> {8}     | <chem>NCC1CCCCO1</chem>          |
| 9  | <b>15</b> {9}     | <chem>COCCCN</chem>              |
| 10 | <b>15</b> {10}    | <chem>CC(C)CCN</chem>            |
| 11 | <b>15</b> {11}    | <chem>NCC1CCCCC1</chem>          |
| 12 | <b>15</b> {12}    | <chem>CN(C)CCCN</chem>           |
| 13 | <b>15</b> {13}    | <chem>NCC=C</chem>               |
| 14 | <b>15</b> {14}    | <chem>COc1ccc(CCN)cc1</chem>     |
| 15 | <b>15</b> {15}    | <chem>NCc1ccccc1Cl</chem>        |
| 16 | <b>15</b> {16}    | <chem>NCc1ccc(Cl)c1</chem>       |
| 17 | <b>15</b> {17}    | <chem>NC1CC1</chem>              |
| 18 | <b>15</b> {18}    | <chem>COc1ccc(CN)cc1</chem>      |
| 19 | <b>15</b> {19}    | <chem>NC1CCCC1</chem>            |
| 20 | <b>15</b> {20}    | <chem>NCCc1c[nH]c2ccccc12</chem> |
| 21 | <b>15</b> {21}    | <chem>NCCc1ccc(Cl)cc1</chem>     |
| 22 | <b>15</b> {22}    | <chem>NCc1ccc(Cl)cc1Cl</chem>    |
| 23 | <b>15</b> {23}    | <chem>NCCCc1ccccc1</chem>        |
| 24 | <b>15</b> {24}    | <chem>COc1ccc(CN)cc1OC</chem>    |
| 25 | <b>15</b> {25}    | <chem>NCCC1=CCCCC1</chem>        |

|    |        |                       |
|----|--------|-----------------------|
| 26 | 15{26} | COc1cccc1CN           |
| 27 | 15{27} | CCCN                  |
| 28 | 15{28} | NCCc1ccc(F)cc1        |
| 29 | 15{29} | NCc1ccc(F)cc1         |
| 30 | 15{30} | Cc1ccc(CN)cc1         |
| 31 | 15{31} | COc1cccc(CN)c1        |
| 32 | 15{32} | NCc1cccs1             |
| 33 | 15{33} | NCc1cccc1F            |
| 34 | 15{34} | NCc1cccc(c1)C(F)(F)F  |
| 35 | 15{35} | NCCc1ccc(cc1)C(F)(F)F |
| 36 | 15{36} | CC(=O)NCCN            |
| 37 | 15{37} | CN(C)C1(CN)CCCC1      |
| 38 | 15{38} | NCCOc1cccc1           |
| 39 | 15{39} | CC(C)(CN)N1CCOCC1     |
| 40 | 15{40} | CC(C)(CN)N1CCCCC1     |
| 41 | 15{41} | COc1cccc1CCN          |
| 42 | 15{42} | NCCc1ccc2cccc12       |
| 43 | 15{43} | NCc1ccc(cc1)C(N)=O    |
| 44 | 15{44} | NCCCN1CCCCC1=O        |
| 45 | 15{45} | NCCc1cccs1            |
| 46 | 15{46} | NCCc1ccc1             |
| 47 | 15{47} | Cc1cccc1CN            |
| 48 | 15{48} | NCCc1cccc1F           |
| 49 | 15{49} | NCc1ccc(OC(F)F)cc1    |
| 50 | 15{50} | CCCN(C=O)CN           |
| 51 | 15{51} | NCCc1ccc2OCOc2c1      |
| 52 | 15{52} | COc1ccc(C)cc1CCN      |
| 53 | 15{53} | NCCc1cccc(F)c1        |

|    |        |                          |
|----|--------|--------------------------|
| 54 | 15{54} | NCCCOCC1CCCO1            |
| 55 | 15{55} | NCc1ccc(cc1)C(F)(F)F     |
| 56 | 15{56} | Cc1nc(CN)cs1             |
| 57 | 15{57} | Cc1cc(CN)ccc1F           |
| 58 | 15{58} | NCc1ccc(OC(F)(F)F)cc1    |
| 59 | 15{59} | COc1ccc2cc(CN)ccc2c1     |
| 60 | 15{60} | NCc1cnn(c1)-c1ccccc1     |
| 61 | 15{61} | CN(C)S(=O)(=O)c1ccccc1CN |
| 62 | 15{62} | NC1CCN(CC1)C(=O)c1ccc1   |
| 63 | 15{63} | NCC1CC1                  |
| 64 | 15{64} | CN(C)C(=O)c1ccc(CN)cc1   |
| 65 | 15{65} | NC1CCC(CC1)C(F)(F)F      |
| 66 | 15{66} | NCCC1CCCO1               |
| 67 | 15{67} | NCc1ccc(Cl)nc1           |
| 68 | 15{68} | COc1ccc(OC)c(CN)c1       |
| 69 | 15{69} | Cl.NCCNC(=O)c1cccs1      |
| 70 | 15{70} | Cc1ccc(cc1F)C(=O)NCCN    |
| 71 | 15{71} | NCc1cccc(F)c1            |
| 72 | 15{72} | NC1CCC1                  |
| 73 | 15{73} | COc1ccc(CN)c(OC)c1       |
| 74 | 15{74} | CCOc1ccccc1CN            |
| 75 | 15{75} | NCCc1ccccc1Cl            |
| 76 | 15{76} | NCc1ccccc1C(F)(F)F       |
| 77 | 15{77} | NCc1ccc(F)c(F)c1         |
| 78 | 15{78} | Cc1ccc(CN)o1             |
| 79 | 15{79} | NOC1CCCCO1               |
| 80 | 15{80} | NCc1ccc(F)cc1C(F)(F)F    |
| 81 | 15{81} | Cc1ccsc1CN               |

|     |         |                                        |
|-----|---------|----------------------------------------|
| 82  | 15{82}  | <chem>NCc1ccccc1Br</chem>              |
| 83  | 15{83}  | <chem>CCOCCN</chem>                    |
| 84  | 15{84}  | <chem>CC(C)Oc1cccc(CN)c1</chem>        |
| 85  | 15{85}  | <chem>CC(C)Oc1ccccc1CN</chem>          |
| 86  | 15{86}  | <chem>NCCOc1ccccc1Cl</chem>            |
| 87  | 15{87}  | <chem>NCc1ccc(Cl)c(Cl)c1</chem>        |
| 88  | 15{88}  | <chem>NCc1ccc(F)c(Cl)c1</chem>         |
| 89  | 15{89}  | <chem>NCc1ccc(F)cc1F</chem>            |
| 90  | 15{90}  | <chem>CC(C)OCCN</chem>                 |
| 91  | 15{91}  | <chem>Cl.NCCc1c[nH]c2ccc(F)cc12</chem> |
| 92  | 15{92}  | <chem>COc1cccc(CN)c1OC</chem>          |
| 93  | 15{93}  | <chem>Cc1ccc(CN)s1</chem>              |
| 94  | 15{94}  | <chem>Cc1ccccc(CN)c1</chem>            |
| 95  | 15{95}  | <chem>NCc1cc(F)ccc1F</chem>            |
| 96  | 15{96}  | <chem>COc1cccc(CCN)c1</chem>           |
| 97  | 15{97}  | <chem>CCNC(=O)c1ccc(CN)cc1</chem>      |
| 98  | 15{98}  | <chem>NC1CCN(CC1)C1CCCC1</chem>        |
| 99  | 15{99}  | <chem>CCOc1ccc(CN)cc1</chem>           |
| 100 | 15{100} | <chem>Cc1ccc(CN)c(C)c1</chem>          |
| 101 | 15{101} | <chem>Cc1cc(C)c(CN)c(C)c1</chem>       |
| 102 | 15{102} | <chem>NCc1ccsc1</chem>                 |
| 103 | 15{103} | <chem>NCC1CCOC1</chem>                 |
| 104 | 15{104} | <chem>NCc1ccc(CN2CCCC2=O)cc1</chem>    |
| 105 | 15{105} | <chem>NCc1ccccc1CN1CCCC1=O</chem>      |
| 106 | 15{106} | <chem>COCc1ccc(CN)cc1</chem>           |
| 107 | 15{107} | <chem>COCc1cccc(CN)c1</chem>           |
| 108 | 15{108} | <chem>NCc1cccc(c1)C(N)=O</chem>        |
| 109 | 15{109} | <chem>CN(C)C(=O)c1cccc(CN)c1</chem>    |

|     |                 |                                        |
|-----|-----------------|----------------------------------------|
| 110 | <b>15</b> {110} | <chem>CNC(=O)c1cccc(CN)c1</chem>       |
| 111 | <b>15</b> {111} | <chem>NCc1cc(Cl)c2OCCOc2c1</chem>      |
| 112 | <b>15</b> {112} | <chem>NCc1c(Cl)cccc1Cl</chem>          |
| 113 | <b>15</b> {113} | <chem>NCCc1c(F)cccc1F</chem>           |
| 114 | <b>15</b> {114} | <chem>Cc1ccc(CCN)o1</chem>             |
| 115 | <b>15</b> {115} | <chem>NCCN1CCNC1=O</chem>              |
| 116 | <b>15</b> {116} | <chem>CCCC(=O)Nc1ccc(CN)cc1</chem>     |
| 117 | <b>15</b> {117} | <chem>NCc1ccoc1</chem>                 |
| 118 | <b>15</b> {118} | <chem>NCCCC1CCCC1</chem>               |
| 119 | <b>15</b> {119} | <chem>NCc1cccc(c1)N1CCCC1=O</chem>     |
| 120 | <b>15</b> {120} | <chem>Cc1cc(CN)no1</chem>              |
| 121 | <b>15</b> {121} | <chem>NCC1CCOCC1</chem>                |
| 122 | <b>15</b> {122} | <chem>Cl.NCc1csc2cccc12</chem>         |
| 123 | <b>15</b> {123} | <chem>Cc1nn(C)c(C)c1CN</chem>          |
| 124 | <b>15</b> {124} | <chem>NCc1ccc(cc1)-n1cccn1</chem>      |
| 125 | <b>15</b> {125} | <chem>CC(CN)Oc1ccc(C)cc1</chem>        |
| 126 | <b>15</b> {126} | <chem>Cl.NCC12CC3CC(CC(C3)C1)C2</chem> |
| 127 | <b>15</b> {127} | <chem>Cl.NCC#C</chem>                  |
| 128 | <b>15</b> {128} | <chem>NCc1ccc(Cn2cccn2)cc1</chem>      |
| 129 | <b>15</b> {129} | <chem>Cl.NC1Cc2cccc2C1</chem>          |
| 130 | <b>15</b> {130} | <chem>Cl.NC1CCOCC1</chem>              |
| 131 | <b>15</b> {131} | <chem>NCC1CCCc2cccc12</chem>           |
| 132 | <b>15</b> {132} | <chem>NCc1ccc(o1)-c1cccc1</chem>       |
| 133 | <b>15</b> {133} | <chem>Cn1nccc1CN</chem>                |
| 134 | <b>15</b> {134} | <chem>NC1CCCC(O)C1</chem>              |
| 135 | <b>15</b> {135} | <chem>NCc1cnn(Cc2cccc2)c1</chem>       |
| 136 | <b>15</b> {136} | <chem>Cc1n[nH]cc1CN</chem>             |
| 137 | <b>15</b> {137} | <chem>CC(C)NC(=O)Nc1ccc(CN)cc1</chem>  |

|     |                 |                                        |
|-----|-----------------|----------------------------------------|
| 138 | <b>15</b> {138} | <chem>NCc1cc(Br)cs1</chem>             |
| 139 | <b>15</b> {139} | <chem>CC1CC1N</chem>                   |
| 140 | <b>15</b> {140} | <chem>CC(CN)Cn1cccn1</chem>            |
| 141 | <b>15</b> {141} | <chem>Cl.NCCCC(=O)NC1CC1</chem>        |
| 142 | <b>15</b> {142} | <chem>CS(=O)(=O)Cc1ccc(CN)cc1</chem>   |
| 143 | <b>15</b> {143} | <chem>CC(O)c1ccc(CN)cc1</chem>         |
| 144 | <b>15</b> {144} | <chem>NCCn1cccn1</chem>                |
| 145 | <b>15</b> {145} | <chem>NCC1CCCOC1c1ccccc1</chem>        |
| 146 | <b>15</b> {146} | <chem>Cc1cccc(c1)C(=O)NCCN</chem>      |
| 147 | <b>15</b> {147} | <chem>CS(=O)(=O)CCN</chem>             |
| 148 | <b>15</b> {148} | <chem>NCC1CCCCO1</chem>                |
| 149 | <b>15</b> {149} | <chem>NCC1CCC=CC1</chem>               |
| 150 | <b>15</b> {150} | <chem>Cc1cccc(CCN)c1</chem>            |
| 151 | <b>15</b> {151} | <chem>NCCc1ccc(F)cc1F</chem>           |
| 152 | <b>15</b> {152} | <chem>COC(CN)c1ccccc1</chem>           |
| 153 | <b>15</b> {153} | <chem>Cl.NCC1C2CC3CC(C2)CC1C3</chem>   |
| 154 | <b>15</b> {154} | <chem>COc1cc(CN)ccc1C</chem>           |
| 155 | <b>15</b> {155} | <chem>CC1CC(C)CN(C1)C(C)(C)CN</chem>   |
| 156 | <b>15</b> {156} | <chem>CC1CCCN(C1)C(C)(C)CN</chem>      |
| 157 | <b>15</b> {157} | <chem>Cn1cc(CN)cn1</chem>              |
| 158 | <b>15</b> {158} | <chem>CC1CCCC(CN)C1</chem>             |
| 159 | <b>15</b> {159} | <chem>NCc1cccc(NC(=O)C2CCCO2)c1</chem> |
| 160 | <b>15</b> {160} | <chem>Cl.CC(CN)C1CC1</chem>            |
| 161 | <b>15</b> {161} | <chem>NCCc1ccc(Br)s1</chem>            |
| 162 | <b>15</b> {162} | <chem>COCC(C)CN</chem>                 |
| 163 | <b>15</b> {163} | <chem>NCc1ccc(NC(=O)c2ccco2)cc1</chem> |
| 164 | <b>15</b> {164} | <chem>NCCc1cn[nH]c1</chem>             |
| 165 | <b>15</b> {165} | <chem>NCC(Br)=C</chem>                 |

|     |                 |                                        |
|-----|-----------------|----------------------------------------|
| 166 | <b>15</b> {166} | <chem>Cc1cc(CN)on1</chem>              |
| 167 | <b>15</b> {167} | <chem>NCCCc1cccc(Cl)c1</chem>          |
| 168 | <b>15</b> {168} | <chem>NCCc1ccc(F)c(F)c1</chem>         |
| 169 | <b>15</b> {169} | <chem>CC(=O)Nc1ccc(CCN)cc1</chem>      |
| 170 | <b>15</b> {170} | <chem>NCCOCC1CC1</chem>                |
| 171 | <b>15</b> {171} | <chem>Cl.NCCNC(=O)C1CC1</chem>         |
| 172 | <b>15</b> {172} | <chem>Cc1ccoc1CN</chem>                |
| 173 | <b>15</b> {173} | <chem>Cc1cccc1C(C)(C)CN</chem>         |
| 174 | <b>15</b> {174} | <chem>COc1cccc1C(C)(C)CN</chem>        |
| 175 | <b>15</b> {175} | <chem>CCC(CN)c1cccc1</chem>            |
| 176 | <b>15</b> {176} | <chem>Nc1ccc(cc1)C(=O)N1CCCC1</chem>   |
| 177 | <b>15</b> {177} | <chem>Cc1occc1CN</chem>                |
| 178 | <b>15</b> {178} | <chem>Cl.NCC1CCCNC1=O</chem>           |
| 179 | <b>15</b> {179} | <chem>NCCc1cc(F)cc(F)c1</chem>         |
| 180 | <b>15</b> {180} | <chem>Cc1ccenc1CN</chem>               |
| 181 | <b>15</b> {181} | <chem>NCc1nc2CCCc2s1</chem>            |
| 182 | <b>15</b> {182} | <chem>NCc1ccc(OC2CCCC2)cc1</chem>      |
| 183 | <b>15</b> {183} | <chem>Cl.NCCCc1ccc(Cl)cc1</chem>       |
| 184 | <b>15</b> {184} | <chem>COc1cccc1C1(CN)CC1</chem>        |
| 185 | <b>15</b> {185} | <chem>Cl.NC1CCSCC1</chem>              |
| 186 | <b>15</b> {186} | <chem>CC(C)(CN)c1cccc1F</chem>         |
| 187 | <b>15</b> {187} | <chem>Cc1[nH]c2cccc2c1CCN</chem>       |
| 188 | <b>15</b> {188} | <chem>NCCCN1CCOC1=O</chem>             |
| 189 | <b>15</b> {189} | <chem>NC1CCCc2sccc12</chem>            |
| 190 | <b>15</b> {190} | <chem>COc1ccc(CCN)cc1F</chem>          |
| 191 | <b>15</b> {191} | <chem>NCc1cccc(CO)c1</chem>            |
| 192 | <b>15</b> {192} | <chem>CCc1cccc2c(CCN)c[nH]c12</chem>   |
| 193 | <b>15</b> {193} | <chem>Cl.NCc1cccc(CN2CCCC2=O)c1</chem> |



|     |                 |                                           |
|-----|-----------------|-------------------------------------------|
| 194 | <b>15</b> {194} | <chem>CCn1cc(CN)cn1</chem>                |
| 195 | <b>15</b> {195} | <chem>Cc1c(CN)cnn1C</chem>                |
| 196 | <b>15</b> {196} | <chem>Cn1ccc(CN)n1</chem>                 |
| 197 | <b>15</b> {197} | <chem>Cl.NCC(F)F</chem>                   |
| 198 | <b>15</b> {198} | <chem>CC(N)c1cnn(C)c1</chem>              |
| 199 | <b>15</b> {199} | <chem>NCc1cccc2[nH]ccc12</chem>           |
| 200 | <b>15</b> {200} | <chem>NCc1cccc(c1)-n1cncn1</chem>         |
| 201 | <b>15</b> {201} | <chem>Cl.NC1CCCOC1</chem>                 |
| 202 | <b>15</b> {202} | <chem>CCC1(CN)CCC1</chem>                 |
| 203 | <b>15</b> {203} | <chem>CC1(CN)CCCO1</chem>                 |
| 204 | <b>15</b> {204} | <chem>Cl.CCN1CC(N)CC1=O</chem>            |
| 205 | <b>15</b> {205} | <chem>Cl.NCC1=CCCCC1</chem>               |
| 206 | <b>15</b> {206} | <chem>Cl.NCCc1nc(no1)-c1ccc(Cl)cc1</chem> |
| 207 | <b>15</b> {207} | <chem>CC1(CN)CCOC1</chem>                 |
| 208 | <b>15</b> {208} | <chem>CC(C)n1ccc(CN)n1</chem>             |
| 209 | <b>15</b> {209} | <chem>NC1CCN(CC(F)(F)F)C1=O</chem>        |
| 210 | <b>15</b> {210} | <chem>Cc1cc(CN)ncn1</chem>                |
| 211 | <b>15</b> {211} | <chem>Cl.CC1(C)CC1CN</chem>               |
| 212 | <b>15</b> {212} | <chem>Cl.NCCN1C(=O)CNC1=O</chem>          |
| 213 | <b>15</b> {213} | <chem>NCc1ccon1</chem>                    |
| 214 | <b>15</b> {214} | <chem>COc1cc(F)cc(CN)c1</chem>            |
| 215 | <b>15</b> {215} | <chem>NCC1CSCCS1</chem>                   |
| 216 | <b>15</b> {216} | <chem>CCSc1cccc(CN)c1</chem>              |
| 217 | <b>15</b> {217} | <chem>NCC1CCC(CC1)C(F)(F)F</chem>         |
| 218 | <b>15</b> {218} | <chem>Cl.CC1(C)C(CN)C1(C)C</chem>         |
| 219 | <b>15</b> {219} | <chem>NCC1CNC(=O)C1</chem>                |
| 220 | <b>15</b> {220} | <chem>NCCC1CCC1</chem>                    |
| 221 | <b>15</b> {221} | <chem>CC(C)CC1(CN)CCC1</chem>             |

|     |         |                       |
|-----|---------|-----------------------|
| 222 | 15{222} | Cc1nnsclCN            |
| 223 | 15{223} | NCc1ccc(F)cn1         |
| 224 | 15{224} | Cc1nnc(CN)s1          |
| 225 | 15{225} | Cl.Cc1ccc(CN)cc1F     |
| 226 | 15{226} | CC1(C)CCCC(N)C1       |
| 227 | 15{227} | NOC1CCCC1             |
| 228 | 15{228} | Cl.CCOC(=O)C1(CN)CCC1 |
| 229 | 15{229} | CC1(C)CC(N)CCO1       |
| 230 | 15{230} | Cl.NCCC(=O)N1CCCCC1   |
| 231 | 15{231} | Cl.NCCC1CC1           |
| 232 | 15{232} | Cl.COC[C@H](C)N       |
| 233 | 15{233} | NCC1CCCS1             |
| 234 | 15{234} | Cl.CC(=C)CCN          |
| 235 | 15{235} | COC1CCC(CN)CC1        |
| 236 | 15{236} | CC1CC(N)CC(C)O1       |
| 237 | 15{237} | CC1CC(N)CCO1          |
| 238 | 15{238} | Cl.NC1CCC=C1          |
| 239 | 15{239} | Cl.NCC1CCC=C1         |
| 240 | 15{240} | NCCCCC1CC1            |
| 241 | 15{241} | COC1(CN)CCOCC1        |
| 242 | 15{242} | NCc1cc(no1)C1CC1      |
| 243 | 15{243} | NCc1nc(cs1)C(F)(F)F   |
| 244 | 15{244} | CCOC1CC(N)C11CCCC1    |
| 245 | 15{245} | Cl.NC1CCCC1(F)F       |
| 246 | 15{246} | CC(C)(CN)c1cccc(F)c1  |
| 247 | 15{247} | CSCC(C)N              |
| 248 | 15{248} | NCc1cccc2ncccc12      |
| 249 | 15{249} | CC(CN)c1nc(C)cs1      |

|     |         |                            |
|-----|---------|----------------------------|
| 250 | 15{250} | NCCc1nc2CCc2s1             |
| 251 | 15{251} | Cc1nc(C)c(CN)s1            |
| 252 | 15{252} | NCC1(CC1)c1cccc(Cl)c1      |
| 253 | 15{253} | CCn1nncc1CN                |
| 254 | 15{254} | CC(O)(CCN)c1cccc1          |
| 255 | 15{255} | COc1ccc(CN)c(OC)n1         |
| 256 | 15{256} | Cl.CO[C@H](C)CN            |
| 257 | 15{257} | Cl.NC1CCC2(CCCC2)CC1       |
| 258 | 15{258} | NCC1CCC(F)(F)C1            |
| 259 | 15{259} | Cl.COCC(C)(C)CN            |
| 260 | 15{260} | Cl.CC(=O)N1CC[C@@H](N)C1   |
| 261 | 15{261} | Cl.CN1CCC(N)C1=O           |
| 262 | 15{262} | CC(CN)Sc1cccc1             |
| 263 | 15{263} | CC(CN)Oc1cccc1F            |
| 264 | 15{264} | CC(CN)Oc1cccc(C)c1         |
| 265 | 15{265} | CC(CN)Oc1cccc1C            |
| 266 | 15{266} | NCCCC#C                    |
| 267 | 15{267} | NCC1(Cc2cccc2)CC1          |
| 268 | 15{268} | NCc1ccc(CC(N)=O)cc1        |
| 269 | 15{269} | CSCc1ccc(CN)cc1            |
| 270 | 15{270} | Cl.N[C@H]1C[C@H](C1)C(N)=O |
| 271 | 15{271} | Cl.NCC1CC2CCC1CC2          |
| 272 | 15{272} | CCSc1ccc(CN)cc1            |
| 273 | 15{273} | NCCn1cc(Br)cn1             |
| 274 | 15{274} | NCCn1ccc2cc(Cl)ccc12       |
| 275 | 15{275} | NCc1ccc(Br)s1              |
| 276 | 15{276} | Cl.NCC1CCC2(CC2)CC1        |
| 277 | 15{277} | NCc1c(F)cccc1OC(F)F        |

|     |         |                         |
|-----|---------|-------------------------|
| 278 | 15{278} | Cl.NCc1nnnn1C1CC1       |
| 279 | 15{279} | CSC(C)CN                |
| 280 | 15{280} | NCCc1cc(Br)cn1          |
| 281 | 15{281} | NCc1nc2CCOCc2s1         |
| 282 | 15{282} | Cl.NC1CC(C1)OCc1cccc1   |
| 283 | 15{283} | CCC(=O)N1CCC(N)C1       |
| 284 | 15{284} | COCCC1(CN)CCCC1         |
| 285 | 15{285} | CCOCCC1(CN)CCCC1        |
| 286 | 15{286} | CCC1(CN)CCCC1           |
| 287 | 15{287} | Cn1nccc1CCN             |
| 288 | 15{288} | CC(C)(C)C1CC(N)CCO1     |
| 289 | 15{289} | CC(C)C1CC(N)CCO1        |
| 290 | 15{290} | NCCCOCC1CCOC1           |
| 291 | 15{291} | CC(C)c1csc(CN)n1        |
| 292 | 15{292} | NCCOCC1CCCC1            |
| 293 | 15{293} | NCCc1cccc1              |
| 294 | 15{294} | NCc1cnn(CC(F)(F)F)c1    |
| 295 | 15{295} | CNC(=O)C(C)(C)CN        |
| 296 | 15{296} | CCNC(=O)C(C)(C)CN       |
| 297 | 15{297} | CC(CN)c1nccs1           |
| 298 | 15{298} | CCN(C)C(=O)CN           |
| 299 | 15{299} | COC1CC(N)C1(C)C         |
| 300 | 15{300} | Cl.CC(C)(C)N1CC(N)CC1=O |
| 301 | 15{301} | CCSC1CCCC(N)C1          |
| 302 | 15{302} | Cl.CC(C)C1OCCCC1CN      |
| 303 | 15{303} | CCOCCC1(CN)CCC1         |
| 304 | 15{304} | COCCC1(CN)CCC1          |
| 305 | 15{305} | Cl.CC(C)CC1(CN)CC1      |

|     |         |                          |
|-----|---------|--------------------------|
| 306 | 15{306} | Cc1cscc1CN               |
| 307 | 15{307} | Cl.CCCC1(CN)CCC1         |
| 308 | 15{308} | CCC(OCCN)c1cccc1         |
| 309 | 15{309} | COCCC1(CN)CC1            |
| 310 | 15{310} | CCOCCC1(CN)CC1           |
| 311 | 15{311} | COC(CN)C1CCCCC1          |
| 312 | 15{312} | COC1(CN)CCC1             |
| 313 | 15{313} | CC(C)(O)C(C)(C)CN        |
| 314 | 15{314} | CCc1nn(C)c(CC)c1CN       |
| 315 | 15{315} | CSc1cccc(F)c1CN          |
| 316 | 15{316} | NCCC1CC2CCC1O2           |
| 317 | 15{317} | Cl.CCCC1(CN)CC1          |
| 318 | 15{318} | Cl.CC1CCC(N)C1           |
| 319 | 15{319} | CC(C)(CN)C1CCCC1         |
| 320 | 15{320} | Cl.CO[C@H]1C[C@H](N)C1   |
| 321 | 15{321} | Cl.CCC1(CN)CCOCC1        |
| 322 | 15{322} | Cl.NC1CC(C1)C(N)=O       |
| 323 | 15{323} | Cl.COCC1CC(N)C1          |
| 324 | 15{324} | Cl.CS(=O)(=O)C1(CN)CC1   |
| 325 | 15{325} | Cl.CC1CC(CN)CCO1         |
| 326 | 15{326} | Cl.CC1(CN)CCCc2cccc12    |
| 327 | 15{327} | Cl.NC1CC2(CCC2)C1        |
| 328 | 15{328} | Cl.CCO[C@@H]1C[C@H](N)C1 |
| 329 | 15{329} | Cl.CCO[C@H]1C[C@H](N)C1  |
| 330 | 15{330} | Cl.NCC1CCCCS1(=O)=O      |
| 331 | 15{331} | NCc1sc(c1)C(F)(F)F       |
| 332 | 15{332} | CON1CCC(N)CC1            |
| 333 | 15{333} | NC1COC2(CCC2)C1          |

|     |                |                                    |
|-----|----------------|------------------------------------|
| 334 | <b>15{334}</b> | Cl.CCS(=O)(=O)c1ccc(CN)cc1         |
| 335 | <b>15{335}</b> | Cl.C[C@H]1OCC[C@H]1N               |
| 336 | <b>15{336}</b> | Cl.CCC[1C@@H]1C[1C@H]1N            |
| 337 | <b>15{337}</b> | Cn1nccc1C1CC(N)CCO1                |
| 338 | <b>15{338}</b> | CN1CCC[C@@H](CN)[C@@H]1c1ccnn1C    |
| 339 | <b>15{339}</b> | NCC(C1CCC1)C1CCC1                  |
| 340 | <b>15{340}</b> | NCCC1CCC2(CCC2)O1                  |
| 341 | <b>15{341}</b> | NCc1nc(n2CCCCc12)C(F)(F)F          |
| 342 | <b>15{342}</b> | Cl.CC(C)(CN)C1CCC1                 |
| 343 | <b>15{343}</b> | Cl.CC1(CN)CC1(Cl)Cl                |
| 344 | <b>15{344}</b> | Cl.CC(C)[1C@@H]1C[1C@H]1N          |
| 345 | <b>15{345}</b> | Cl.CC(C)C[1C@@H]1C[1C@H]1N         |
| 346 | <b>15{346}</b> | Cc1nn(C)c(C)c1[1C@@H]1OCC[1C@H]1CN |
| 347 | <b>15{347}</b> | CC(C)(C)O[C@@H]1C[C@H](N)C1        |
| 348 | <b>15{348}</b> | Cl.COC(=O)CC1CC(N)C1               |
| 349 | <b>15{349}</b> | Cl.CCN1CCC(N)C1=O                  |
| 350 | <b>15{350}</b> | Cl.N[C@H]1C[C@@H](C1)C(N)=O        |
| 351 | <b>15{351}</b> | Cl.COCC1(CCN)CC1                   |
| 352 | <b>15{352}</b> | NCCCC1(O)CCC1                      |
| 353 | <b>15{353}</b> | Cl.NCCN1CC2CCCCN2C1=O              |
| 354 | <b>15{354}</b> | Cl.NCC1SCCS1                       |
| 355 | <b>15{355}</b> | NC1COC(C1)C1CC1                    |
| 356 | <b>15{356}</b> | Cl.NC1CCN(C2CCCCC2)C1=O            |
| 357 | <b>15{357}</b> | Cl.CO[C@@H]1C[C@H](CN)C1           |
| 358 | <b>15{358}</b> | Cl.NC1CCN(C2CCC2)C1=O              |
| 359 | <b>15{359}</b> | CC1CC2(CCC(CN)O2)CO1               |
| 360 | <b>15{360}</b> | CC1(CN)CCOC2(CCC2)C1               |
| 361 | <b>15{361}</b> | Cl.NC[1C@@H]1CCO[1C@H]1c1cccc1     |

|     |                 |                                       |
|-----|-----------------|---------------------------------------|
| 362 | <b>15</b> {362} | Cl.NCC12COCCN1C(=O)COC2               |
| 363 | <b>15</b> {363} | Cl.NCC1CC2(CO1)CCOCC2                 |
| 364 | <b>15</b> {364} | Cl.NCC1CC2CCC(C1)S2(=O)=O             |
| 365 | <b>15</b> {365} | NCC1CCC2(CCOCC2)CO1                   |
| 366 | <b>15</b> {366} | NCCC1CCC2(CCOCC2)CO1                  |
| 367 | <b>15</b> {367} | Cl.NCCC1CCCC1(F)F                     |
| 368 | <b>15</b> {368} | Cl.NCC1CCC2(CCC2)CO1                  |
| 369 | <b>15</b> {369} | Cl.NC1CC(CC(N)=O)C1                   |
| 370 | <b>15</b> {370} | Cl.NCC1CC2CCC(C1)S2                   |
| 371 | <b>15</b> {371} | Cl.COC1(CN)CCS(=O)(=O)C1              |
| 372 | <b>15</b> {372} | Cl.NCC12CC1CCCC2                      |
| 373 | <b>15</b> {373} | Cl.NCC1CCC(O1)C(F)(F)F                |
| 374 | <b>15</b> {374} | Cl.NC[1C@@H]1[1C@@H](c2ccccc2)C1(F)F  |
| 375 | <b>15</b> {375} | Cl.N[1C@@H]1[1C@H]2Cc3ccccc3[1C@@H]12 |
| 376 | <b>15</b> {376} | Cl.NCC1CCCC2(CCC2)O1                  |
| 377 | <b>15</b> {377} | Cl.NCC1CCC2(CCOCC2)O1                 |
| 378 | <b>15</b> {378} | Cl.NC[1C@]12C[1C@H]1CCC2              |

**Table S4.** Parallel synthesis of 5-aminotetrazoles **8**

| #  | Isothio-<br>cyanate | Secondary<br>amine | Product         | SMILE                                                    | Yield,<br>mg | Yield,<br>% |
|----|---------------------|--------------------|-----------------|----------------------------------------------------------|--------------|-------------|
| 1  | <b>10</b> {1}       | <b>11</b> {1}      | <b>8</b> {1,1}  | <chem>CNS(=O)(=O)c1cccc2CN(CCC12)c1nnnn1CC=C</chem>      | 27           | 22          |
| 2  | <b>10</b> {1}       | <b>11</b> {2}      | <b>8</b> {1,2}  | <chem>C=CCn1nnnc1N1CCN(CC1)C(=O)C(=O)NC1CC1</chem>       | 13           | 15          |
| 3  | <b>10</b> {1}       | <b>11</b> {3}      | <b>8</b> {1,3}  | <chem>OC1(Cc2nc(no2)C2CC2)CCCN(C1)c1nnnn1CC=C</chem>     | 0            | 0           |
| 4  | <b>10</b> {2}       | <b>11</b> {4}      | <b>8</b> {2,4}  | <chem>Cn1nnnc1N1CCOC2(CCC2)C1</chem>                     | 0            | 0           |
| 5  | <b>10</b> {2}       | <b>11</b> {5}      | <b>8</b> {2,5}  | <chem>Cn1nnnc1N1CCOCC1c1cc(F)cc(F)c1</chem>              | 0            | 0           |
| 6  | <b>10</b> {2}       | <b>11</b> {6}      | <b>8</b> {2,6}  | <chem>Cn1nnnc1N1CCOc2cc(F)ccc2C1</chem>                  | 0            | 0           |
| 7  | <b>10</b> {2}       | <b>11</b> {7}      | <b>8</b> {2,7}  | <chem>CC1=C(C)CN(CC1)c1nnnn1C</chem>                     | 0            | 0           |
| 8  | <b>10</b> {2}       | <b>11</b> {8}      | <b>8</b> {2,8}  | <chem>Cn1nnnc1N1CC2(CCOCC2)[1C@@H]2CCC[1C@H]12</chem>    | 43           | 34          |
| 9  | <b>10</b> {2}       | <b>11</b> {9}      | <b>8</b> {2,9}  | <chem>Cn1nnnc1N1CCCC1c1nc2cc(Cl)ccc2[nH]1</chem>         | 43           | 21          |
| 10 | <b>10</b> {3}       | <b>11</b> {10}     | <b>8</b> {3,10} | <chem>CCCCn1nnnc1N1CCN(CC1)C(=O)c1cccn1C</chem>          | 27           | 31          |
| 11 | <b>10</b> {3}       | <b>11</b> {2}      | <b>8</b> {3,2}  | <chem>CCCCn1nnnc1N1CCN(CC1)C(=O)C(=O)NC1CC1</chem>       | 16           | 21          |
| 12 | <b>10</b> {3}       | <b>11</b> {8}      | <b>8</b> {3,8}  | <chem>CCCCn1nnnc1N1CC2(CCOCC2)[1C@@H]2CCC[1C@H]12</chem> | 21           | 24          |
| 13 | <b>10</b> {3}       | <b>11</b> {3}      | <b>8</b> {3,3}  | <chem>CCCCn1nnnc1N1CCCC(O)(Cc2nc(no2)C2CC2)C1</chem>     | 0            | 0           |
| 14 | <b>10</b> {3}       | <b>11</b> {11}     | <b>8</b> {3,11} | <chem>CCCCn1nnnc1N(CC(=O)NC)Cc1cccc1</chem>              | 0            | 0           |
| 15 | <b>10</b> {3}       | <b>11</b> {12}     | <b>8</b> {3,12} | <chem>CCCCn1nnnc1N1CCCC(C1)c1nnn1C</chem>                | 0            | 0           |
| 16 | <b>10</b> {4}       | <b>11</b> {7}      | <b>8</b> {4,7}  | <chem>CCn1nnnc1N1CCC(C)=C(C)C1</chem>                    | 0            | 0           |
| 17 | <b>10</b> {4}       | <b>11</b> {8}      | <b>8</b> {4,8}  | <chem>CCn1nnnc1N1CC2(CCOCC2)[1C@@H]2CCC[1C@H]12</chem>   | 26           | 29          |



|    |       |        |         |                                                    |    |    |
|----|-------|--------|---------|----------------------------------------------------|----|----|
| 18 | 10{4} | 11{2}  | 8{4,2}  | CCn1nnnc1N1CCN(CC1)C(=O)C(=O)NC1CC1                | 29 | 30 |
| 19 | 10{5} | 11{13} | 8{5,13} | C(c1ccccc1)n1nnnc1N1CCCC1C1CCCO1                   | 35 | 34 |
| 20 | 10{5} | 11{14} | 8{5,14} | CC(CS(C)(=O)=O)N(C1CC1)c1nnnn1CCc1ccccc1           | 15 | 18 |
| 21 | 10{5} | 11{15} | 8{5,15} | COC1(CCN(CC1)c1nnnn1CCc1ccccc1)C(F)(F)F            | 0  | 0  |
| 22 | 10{5} | 11{8}  | 8{5,8}  | C(c1ccccc1)n1nnnc1N1CC2(CCOCC2)[1C@@H]2CCC[1C@H]12 | 0  | 0  |
| 23 | 10{5} | 11{12} | 8{5,12} | Cn1cnnc1C1CCCN(C1)c1nnnn1CCc1ccccc1                | 0  | 0  |
| 24 | 10{6} | 11{16} | 8{6,16} | O=C1NCCN1C1CCCN(C1)c1nnnn1CCc1ccccc1               | 29 | 30 |
| 25 | 10{6} | 11{13} | 8{6,13} | C(Cn1nnnc1N1CCCC1C1CCCO1)c1ccccc1                  | 5  | 5  |
| 26 | 10{6} | 11{14} | 8{6,14} | CC(CS(C)(=O)=O)N(C1CC1)c1nnnn1CCc1ccccc1           | 0  | 0  |
| 27 | 10{6} | 11{17} | 8{6,17} | COCCCN(CCOC)c1nnnn1CCc1ccccc1                      | 0  | 0  |
| 28 | 10{6} | 11{18} | 8{6,18} | NC(=O)[C@@H]1C[C@@H](F)CN1c1nnnn1CCc1ccccc1        | 0  | 0  |
| 29 | 10{6} | 11{12} | 8{6,12} | Cn1cnnc1C1CCCN(C1)c1nnnn1CCc1ccccc1                | 0  | 0  |
| 30 | 10{6} | 11{4}  | 8{6,4}  | C(Cn1nnnc1N1CCOC2(CCC2)C1)c1ccccc1                 | 0  | 0  |
| 31 | 10{7} | 11{19} | 8{7,19} | COC1(CCN(C1)c1nnnn1C1CCCCC1)C(F)(F)F               | 14 | 7  |
| 32 | 10{7} | 11{20} | 8{7,20} | CCC1(CCN(CC1)c1nnnn1C1CCCCC1)N1CCOCC1              | 20 | 10 |
| 33 | 10{7} | 11{21} | 8{7,21} | CN(C1CCN(CC1)S(C)(=O)=O)c1nnnn1C1CCCCC1            | 26 | 13 |
| 34 | 10{7} | 11{22} | 8{7,22} | C1CCC(CC1)n1nnnc1N1CCCC(CC1)n1ccnn1                | 0  | 0  |
| 35 | 10{8} | 11{23} | 8{8,23} | C(Cn1nnnc1N1CCCCc2ccccc12)N1CCOCC1                 | 19 | 9  |
| 36 | 10{8} | 11{24} | 8{8,24} | CC1(C)CC(O)CCN(C1)c1nnnn1CCN1CCOCC1                | 0  | 0  |
| 37 | 10{8} | 11{25} | 8{8,25} | C(Cn1nnnc1N1CCCC1c1ccccc1)N1CCOCC1                 | 0  | 0  |
| 38 | 10{8} | 11{26} | 8{8,26} | Clc1ccc2CN(CCc2c1)c1nnnn1CCN1CCOCC1                | 0  | 0  |

|    |        |        |          |                                         |    |    |
|----|--------|--------|----------|-----------------------------------------|----|----|
| 39 | 10{8}  | 11{27} | 8{8,27}  | C(Cn1nnnc1N1CCC(CC1)c1ccncc1)N1CCOCC1   | 0  | 0  |
| 40 | 10{8}  | 11{28} | 8{8,28}  | COC1CCCN(C1)c1nnnn1CCN1CCOCC1           | 0  | 0  |
| 41 | 10{8}  | 11{29} | 8{8,29}  | Cc1ccc2CN(CCc2c1)c1nnnn1CCN1CCOCC1      | 0  | 0  |
| 42 | 10{8}  | 11{30} | 8{8,30}  | C(Cn1nnnc1N1CCC=CC1)N1CCOCC1            | 0  | 0  |
| 43 | 10{8}  | 11{31} | 8{8,31}  | C(Cn1nnnc1N1CCC(CC1)c1ccccc1)N1CCOCC1   | 0  | 0  |
| 44 | 10{8}  | 11{32} | 8{8,32}  | CC1N(CCc2cccc(F)c12)c1nnnn1CCN1CCOCC1   | 0  | 0  |
| 45 | 10{8}  | 11{33} | 8{8,33}  | O=C1CCN(CCN1)c1nnnn1CCN1CCOCC1          | 0  | 0  |
| 46 | 10{8}  | 11{34} | 8{8,34}  | CCC1N(CCc2sccc12)c1nnnn1CCN1CCOCC1      | 0  | 0  |
| 47 | 10{8}  | 11{35} | 8{8,35}  | C(Cn1nnnc1N1CCCC(C1)c1ncc[nH]1)N1CCOCC1 | 0  | 0  |
| 48 | 10{8}  | 11{36} | 8{8,36}  | O[C@H]1CCN(C1)c1nnnn1CCN1CCOCC1         | 0  | 0  |
| 49 | 10{8}  | 11{37} | 8{8,37}  | COc1ccc2CN(CCc2c1)c1nnnn1CCN1CCOCC1     | 0  | 0  |
| 50 | 10{8}  | 11{38} | 8{8,38}  | C(Cn1nnnc1N1CCc2nc[nH]c2C1)N1CCOCC1     | 0  | 0  |
| 51 | 10{8}  | 11{39} | 8{8,39}  | Fc1ccc2N(CCc2c1)c1nnnn1CCN1CCOCC1       | 0  | 0  |
| 52 | 10{9}  | 11{4}  | 8{9,4}   | COCCn1nnnc1N1CCOC2(CCC2)C1              | 29 | 35 |
| 53 | 10{9}  | 11{7}  | 8{9,7}   | COCCn1nnnc1N1CCC(C)=C(C)C1              | 21 | 22 |
| 54 | 10{9}  | 11{5}  | 8{9,5}   | COCCn1nnnc1N1CCOCC1c1cc(F)cc(F)c1       | 0  | 0  |
| 55 | 10{9}  | 11{6}  | 8{9,6}   | COCCn1nnnc1N1CCOc2cc(F)ccc2C1           | 0  | 0  |
| 56 | 10{10} | 11{40} | 8{10,40} | CC(C)n1nnnc1N1CCc2[nH]ncc2C1            | 0  | 0  |
| 57 | 10{10} | 11{41} | 8{10,41} | COc1ccc(CN(C)c2nnnn2C(C)C)cn1           | 0  | 0  |
| 58 | 10{10} | 11{42} | 8{10,42} | CC(C)n1nnnc1N1CCCC(C1)c1nnc2ccccc12     | 0  | 0  |
| 59 | 10{10} | 11{43} | 8{10,43} | CC(C)n1nnnc1N(C)[C@H]1C[C@H](C1)C(N)=O  | 16 | 8  |

|    |                |                |                  |                                                   |    |    |
|----|----------------|----------------|------------------|---------------------------------------------------|----|----|
| 60 | <b>10</b> {10} | <b>11</b> {2}  | <b>8</b> {10,2}  | CC(C)n1nnnc1N1CCN(CC1)C(=O)C(=O)NC1CC1            | 19 | 18 |
| 61 | <b>10</b> {10} | <b>11</b> {44} | <b>8</b> {10,44} | CC(C)n1nnnc1N1CCN(CC1)c1cccc2[nH]c(=O)[nH]c12     | 5  | 3  |
| 62 | <b>10</b> {10} | <b>11</b> {45} | <b>8</b> {10,45} | CC(C)n1nnnc1N1CCN(CCCc2cncn2)CC1                  | 16 | 8  |
| 63 | <b>10</b> {10} | <b>11</b> {46} | <b>8</b> {10,46} | CC(C)n1nnnc1N(Cc1ccc(C)o1)C1CC1                   | 15 | 7  |
| 64 | <b>10</b> {10} | <b>11</b> {47} | <b>8</b> {10,47} | CC(C)n1nnnc1N1CC2(C)C(=O)NC(=O)C2(C)C1            | 26 | 13 |
| 65 | <b>10</b> {10} | <b>11</b> {1}  | <b>8</b> {10,1}  | CNS(=O)(=O)c1cccc2CN(CCCc12)c1nnnn1C(C)C          | 17 | 13 |
| 66 | <b>10</b> {10} | <b>11</b> {48} | <b>8</b> {10,48} | CC(C)n1nnnc1N1CCN(CC1)c1cc(C)ccn1                 | 9  | 4  |
| 67 | <b>10</b> {10} | <b>11</b> {49} | <b>8</b> {10,49} | CC(C)n1nnnc1N(C)CCS(C)(=O)=O                      | 11 | 5  |
| 68 | <b>10</b> {10} | <b>11</b> {50} | <b>8</b> {10,50} | CC(C)n1nnnc1N1CCCC(CNS(C)(=O)=O)C1                | 51 | 29 |
| 69 | <b>10</b> {10} | <b>11</b> {51} | <b>8</b> {10,51} | CCN(CC1CCOC1)c1nnnn1C(C)C                         | 43 | 22 |
| 70 | <b>10</b> {10} | <b>11</b> {52} | <b>8</b> {10,52} | CC(C)n1nnnc1N1CCC(CC1)N1CCCCC1                    | 16 | 8  |
| 71 | <b>10</b> {10} | <b>11</b> {53} | <b>8</b> {10,53} | CC(C)n1nnnc1N(C)CCNC(C)=O                         | 19 | 10 |
| 72 | <b>10</b> {10} | <b>11</b> {54} | <b>8</b> {10,54} | CC(C)n1nnnc1N1CCN(CC1)C1CCCCC1                    | 0  | 0  |
| 73 | <b>10</b> {10} | <b>11</b> {55} | <b>8</b> {10,55} | CC(C)n1nnnc1N(C)Cc1nccn1C                         | 0  | 0  |
| 74 | <b>10</b> {10} | <b>11</b> {56} | <b>8</b> {10,56} | CC(C)n1nnnc1N1CCCC(C1)c1ccnn1C                    | 0  | 0  |
| 75 | <b>10</b> {11} | <b>11</b> {2}  | <b>8</b> {11,2}  | CC(=C)Cn1nnnc1N1CCN(CC1)C(=O)C(=O)NC1CC1          | 17 | 19 |
| 76 | <b>10</b> {11} | <b>11</b> {12} | <b>8</b> {11,12} | CC(=C)Cn1nnnc1N1CCCC(C1)c1nncn1C                  | 0  | 0  |
| 77 | <b>10</b> {12} | <b>11</b> {6}  | <b>8</b> {12,6}  | CCOCCCN1nnnc1N1CCOc2cc(F)ccc2C1                   | 29 | 27 |
| 78 | <b>10</b> {12} | <b>11</b> {8}  | <b>8</b> {12,8}  | CCOCCCN1nnnc1N1CC2(CCOCC2)[1C@@H]2CCC[1C@H]<br>12 | 9  | 10 |
| 79 | <b>10</b> {12} | <b>11</b> {7}  | <b>8</b> {12,7}  | CCOCCCN1nnnc1N1CCC(C)=C(C)C1                      | 11 | 12 |
| 80 | <b>10</b> {12} | <b>11</b> {10} | <b>8</b> {12,10} | CCOCCCN1nnnc1N1CCN(CC1)C(=O)c1cccn1C              | 0  | 0  |

|     |        |        |          |                                                  |    |    |
|-----|--------|--------|----------|--------------------------------------------------|----|----|
| 81  | 10{13} | 11{57} | 8{13,57} | COc1ccc(CCN2nnnc2N2CCCc3n[nH]cc23)cc1            | 5  | 3  |
| 82  | 10{13} | 11{58} | 8{13,58} | COc1ccc(CCN2nnnc2N2CC[1C@@H](C)O[1C@@H](C)C2)cc1 | 34 | 16 |
| 83  | 10{13} | 11{59} | 8{13,59} | COc1ccc(CCN2nnnc2N2Cc3ccc(O)cc3C2)cc1            | 11 | 5  |
| 84  | 10{13} | 11{60} | 8{13,60} | COc1ccc(CCN2nnnc2N2C3CCC2CC(=O)NC3)cc1           | 7  | 4  |
| 85  | 10{13} | 11{61} | 8{13,61} | COc1ccc(CCN2nnnc2N2CCC3(C2)CCOCC3)cc1            | 48 | 22 |
| 86  | 10{13} | 11{62} | 8{13,62} | COc1ccc(CCN2nnnc2N2C3CCC2C=CC3)cc1               | 30 | 16 |
| 87  | 10{13} | 11{63} | 8{13,63} | COc1ccc(CCN2nnnc2N2CCN3C(CNC3=O)C2)cc1           | 10 | 4  |
| 88  | 10{13} | 11{17} | 8{13,17} | COCCCN(CCOC)c1nnnn1CCc1ccc(OC)cc1                | 8  | 8  |
| 89  | 10{13} | 11{64} | 8{13,64} | COc1ccc(CCN2nnnc2N2CCOCC(F)(F)C2)cc1             | 0  | 0  |
| 90  | 10{13} | 11{65} | 8{13,65} | COc1ccc(CCN2nnnc2N2CCC=C(F)C2)cc1                | 0  | 0  |
| 91  | 10{13} | 11{66} | 8{13,66} | COc1ccc(CCN2nnnc2N2CC3C4OC(C=C4)C3C2)cc1         | 0  | 0  |
| 92  | 10{13} | 11{13} | 8{13,13} | COc1ccc(CCN2nnnc2N2CCCC2C2CCCO2)cc1              | 0  | 0  |
| 93  | 10{13} | 11{67} | 8{13,67} | COc1ccc(CCN2nnnc2N2C3CCC2C(CO)C3)cc1             | 0  | 0  |
| 94  | 10{14} | 11{8}  | 8{14,8}  | CCCN1nnnc1N1CC2(CCOCC2)[1C@@H]2CCC[1C@H]12       | 0  | 0  |
| 95  | 10{14} | 11{7}  | 8{14,7}  | CCCN1nnnc1N1CCC(C)=C(C)C1                        | 0  | 0  |
| 96  | 10{14} | 11{12} | 8{14,12} | CCCN1nnnc1N1CCCC(C1)c1nnnc1C                     | 4  | 4  |
| 97  | 10{14} | 11{2}  | 8{14,2}  | CCCN1nnnc1N1CCN(CC1)C(=O)C(=O)NC1CC1             | 30 | 32 |
| 98  | 10{15} | 11{68} | 8{15,68} | C1CC1n1nnnc1N1CCCC(C1)c1ccn[nH]1                 | 0  | 0  |
| 99  | 10{15} | 11{1}  | 8{15,1}  | CNS(=O)(=O)c1cccc2CN(Cc12)c1nnnn1C1CC1           | 8  | 10 |
| 100 | 10{15} | 11{69} | 8{15,69} | CN(CC(C)(C)CO)c1nnnn1C1CC1                       | 10 | 5  |
| 101 | 10{15} | 11{70} | 8{15,70} | COc1cccc(c1)C1CCN(CC1)c1nnnn1C1CC1               | 13 | 6  |

|     |                |                |                  |                                                           |    |    |
|-----|----------------|----------------|------------------|-----------------------------------------------------------|----|----|
| 102 | <b>10</b> {15} | <b>11</b> {7}  | <b>8</b> {15,7}  | <chem>CC1=C(C)CN(CC1)c1nnnn1C1CC1</chem>                  | 36 | 30 |
| 103 | <b>10</b> {15} | <b>11</b> {2}  | <b>8</b> {15,2}  | <chem>O=C(NC1CC1)C(=O)N1CCN(CC1)c1nnnn1C1CC1</chem>       | 20 | 22 |
| 104 | <b>10</b> {15} | <b>11</b> {8}  | <b>8</b> {15,8}  | <chem>C1CC1n1nnnc1N1CC2(CCOCC2)[1C@@H]2CCC[1C@H]12</chem> | 66 | 81 |
| 105 | <b>10</b> {15} | <b>11</b> {71} | <b>8</b> {15,71} | <chem>CCn1cc(CN(C)c2nnnn2C2CC2)cn1</chem>                 | 62 | 31 |
| 106 | <b>10</b> {15} | <b>11</b> {72} | <b>8</b> {15,72} | <chem>CCN(Cc1ccoc1)c1nnnn1C1CC1</chem>                    | 87 | 42 |
| 107 | <b>10</b> {16} | <b>11</b> {73} | <b>8</b> {16,73} | <chem>COCC(C)n1nnnc1N1CCc2cn[nH]c2C1</chem>               | 0  | 0  |
| 108 | <b>10</b> {16} | <b>11</b> {74} | <b>8</b> {16,74} | <chem>COCC(C)n1nnnc1N1CCN(CC1)c1nc(C)c(C)s1</chem>        | 0  | 0  |
| 109 | <b>10</b> {16} | <b>11</b> {75} | <b>8</b> {16,75} | <chem>COCC(C)n1nnnc1N1CCN(CC1)C(=O)c1cccc(O)c1</chem>     | 7  | 3  |
| 110 | <b>10</b> {16} | <b>11</b> {76} | <b>8</b> {16,76} | <chem>COCC(C)n1nnnc1N1CCn2ccnc12</chem>                   | 8  | 4  |
| 111 | <b>10</b> {16} | <b>11</b> {77} | <b>8</b> {16,77} | <chem>COCC(C)n1nnnc1N1CCc2nc(ncc2C1)C1CC1</chem>          | 17 | 9  |
| 112 | <b>10</b> {16} | <b>11</b> {48} | <b>8</b> {16,48} | <chem>COCC(C)n1nnnc1N1CCN(CC1)c1cc(C)ccn1</chem>          | 8  | 4  |
| 113 | <b>10</b> {16} | <b>11</b> {78} | <b>8</b> {16,78} | <chem>COCC(C)n1nnnc1N1CCCc2cc(OC)ccc2C1</chem>            | 0  | 0  |
| 114 | <b>10</b> {16} | <b>11</b> {79} | <b>8</b> {16,79} | <chem>COCC(C)n1nnnc1N1CCC[C@@H]1C(N)=O</chem>             | 0  | 0  |
| 115 | <b>10</b> {17} | <b>11</b> {15} | <b>8</b> {17,15} | <chem>COC1(CCN(CC1)c1nnnn1C1CC2CCC1C2)C(F)(F)F</chem>     | 29 | 35 |
| 116 | <b>10</b> {17} | <b>11</b> {80} | <b>8</b> {17,80} | <chem>C(OC1CCN(CC1)c1nnnn1C1CC2CCC1C2)C1CCCO1</chem>      | 33 | 40 |
| 117 | <b>10</b> {18} | <b>11</b> {81} | <b>8</b> {18,81} | <chem>NC(=O)C1CN(CCO1)c1nnnn1CCSc1cccc1</chem>            | 0  | 0  |
| 118 | <b>10</b> {19} | <b>11</b> {36} | <b>8</b> {19,36} | <chem>O[C@H]1CCN(C1)c1nnnn1Cc1ccnc1</chem>                | 0  | 0  |
| 119 | <b>10</b> {19} | <b>11</b> {82} | <b>8</b> {19,82} | <chem>C(c1ccnc1)n1nnnc1N1CCC2(CCCC2)C1</chem>             | 0  | 0  |
| 120 | <b>10</b> {19} | <b>11</b> {83} | <b>8</b> {19,83} | <chem>CN(C1CCCc2nc(C)sc12)c1nnnn1Cc1ccnc1</chem>          | 0  | 0  |
| 121 | <b>10</b> {19} | <b>11</b> {84} | <b>8</b> {19,84} | <chem>CN(CC(=O)N1CCCC1)c1nnnn1Cc1ccnc1</chem>             | 0  | 0  |
| 122 | <b>10</b> {19} | <b>11</b> {85} | <b>8</b> {19,85} | <chem>Fc1cccc(c1)N1CCN(CC1)c1nnnn1Cc1ccnc1</chem>         | 0  | 0  |

|     |                |                 |                   |                                          |   |   |
|-----|----------------|-----------------|-------------------|------------------------------------------|---|---|
| 123 | <b>10</b> {19} | <b>11</b> {86}  | <b>8</b> {19,86}  | OCC1CCCCCN1c1nnnn1Cc1ccnc1               | 0 | 0 |
| 124 | <b>10</b> {19} | <b>11</b> {87}  | <b>8</b> {19,87}  | CN(Cc1ccoc1C)c1nnnn1Cc1ccnc1             | 0 | 0 |
| 125 | <b>10</b> {19} | <b>11</b> {88}  | <b>8</b> {19,88}  | C(C1CCOCC1)N1CCN(CC1)c1nnnn1Cc1ccnc1     | 0 | 0 |
| 126 | <b>10</b> {19} | <b>11</b> {78}  | <b>8</b> {19,78}  | COc1ccc2CN(CCCc2c1)c1nnnn1Cc1ccnc1       | 0 | 0 |
| 127 | <b>10</b> {19} | <b>11</b> {89}  | <b>8</b> {19,89}  | CC(N(C)c1nnnn1Cc1ccnc1)c1cccn1           | 0 | 0 |
| 128 | <b>10</b> {19} | <b>11</b> {90}  | <b>8</b> {19,90}  | C(N1CCN(CC1)c1nnnn1Cc1ccnc1)c1escn1      | 0 | 0 |
| 129 | <b>10</b> {19} | <b>11</b> {91}  | <b>8</b> {19,91}  | CC1N(CCOc2ccccc12)c1nnnn1Cc1ccnc1        | 0 | 0 |
| 130 | <b>10</b> {19} | <b>11</b> {92}  | <b>8</b> {19,92}  | C(c1ccnc1)n1nnnc1N1CCCC(C1)c1ccccc1      | 0 | 0 |
| 131 | <b>10</b> {19} | <b>11</b> {93}  | <b>8</b> {19,93}  | C(C1CCCCC1)N1CCN(CC1)c1nnnn1Cc1ccnc1     | 0 | 0 |
| 132 | <b>10</b> {19} | <b>11</b> {94}  | <b>8</b> {19,94}  | CN(c1nnnn1Cc1ccnc1)c1c(C)noc1C           | 0 | 0 |
| 133 | <b>10</b> {19} | <b>11</b> {95}  | <b>8</b> {19,95}  | CC(N(C)c1nnnn1Cc1ccnc1)c1sc(C)nc1C       | 0 | 0 |
| 134 | <b>10</b> {19} | <b>11</b> {96}  | <b>8</b> {19,96}  | CC(C)OC1CCN(CC1)c1nnnn1Cc1ccnc1          | 0 | 0 |
| 135 | <b>10</b> {19} | <b>11</b> {97}  | <b>8</b> {19,97}  | O=C(NC1CC1)C1CCCN1c1nnnn1Cc1ccnc1        | 0 | 0 |
| 136 | <b>10</b> {19} | <b>11</b> {98}  | <b>8</b> {19,98}  | CC(N(C)c1nnnn1Cc1ccnc1)c1ccco1           | 0 | 0 |
| 137 | <b>10</b> {19} | <b>11</b> {99}  | <b>8</b> {19,99}  | C(c1ccnc1)n1nnnc1N1CCn2cncc2C1           | 0 | 0 |
| 138 | <b>10</b> {19} | <b>11</b> {100} | <b>8</b> {19,100} | O=S1CCN(CC1)c1nnnn1Cc1ccnc1              | 0 | 0 |
| 139 | <b>10</b> {19} | <b>11</b> {101} | <b>8</b> {19,101} | CN(Cc1ccc(C)s1)c1nnnn1Cc1ccnc1           | 0 | 0 |
| 140 | <b>10</b> {19} | <b>11</b> {102} | <b>8</b> {19,102} | CN(Cc1snc1C)c1nnnn1Cc1ccnc1              | 0 | 0 |
| 141 | <b>10</b> {19} | <b>11</b> {103} | <b>8</b> {19,103} | Cc1ccc2[nH]c3CCN(Cc3c2c1)c1nnnn1Cc1ccnc1 | 0 | 0 |
| 142 | <b>10</b> {20} | <b>11</b> {79}  | <b>8</b> {20,79}  | CCN1CCCC1Cn1nnnc1N1CCC[C@@H]1C(N)=O      | 0 | 0 |
| 143 | <b>10</b> {20} | <b>11</b> {104} | <b>8</b> {20,104} | CCN1CCCC1Cn1nnnc1N1CCOCC2(CCCC2)C1       | 0 | 0 |

|     |                |                 |                   |                                                  |    |    |
|-----|----------------|-----------------|-------------------|--------------------------------------------------|----|----|
| 144 | <b>10</b> {20} | <b>11</b> {105} | <b>8</b> {20,105} | CCN1CCCC1Cn1nnnc1N1CCN(C)c2ccccc2C1              | 0  | 0  |
| 145 | <b>10</b> {20} | <b>11</b> {38}  | <b>8</b> {20,38}  | CCN1CCCC1Cn1nnnc1N1CCc2nc[nH]c2C1                | 0  | 0  |
| 146 | <b>10</b> {20} | <b>11</b> {106} | <b>8</b> {20,106} | CCN1CCCC1Cn1nnnc1N1CCc2ccccc2CC1                 | 0  | 0  |
| 147 | <b>10</b> {20} | <b>11</b> {40}  | <b>8</b> {20,40}  | CCN1CCCC1Cn1nnnc1N1CCc2[nH]ncc2C1                | 0  | 0  |
| 148 | <b>10</b> {20} | <b>11</b> {107} | <b>8</b> {20,107} | CCN1CCCC1Cn1nnnc1N1CCc2c(F)ccc(F)c2C1            | 0  | 0  |
| 149 | <b>10</b> {20} | <b>11</b> {108} | <b>8</b> {20,108} | CCN1CCCC1Cn1nnnc1N1CCC(CC1)N1CCCC1=O             | 0  | 0  |
| 150 | <b>10</b> {20} | <b>11</b> {109} | <b>8</b> {20,109} | CCN1CCCC1Cn1nnnc1N1CCc2nn(C)c(=O)cc2C1           | 0  | 0  |
| 151 | <b>10</b> {21} | <b>11</b> {110} | <b>8</b> {21,110} | CN(CC1(O)CCOCC1)c1nnnn1C(C)(C)C                  | 0  | 0  |
| 152 | <b>10</b> {21} | <b>11</b> {111} | <b>8</b> {21,111} | CC1CN(CC(C)S1(=O)=O)c1nnnn1C(C)(C)C              | 0  | 0  |
| 153 | <b>10</b> {21} | <b>11</b> {112} | <b>8</b> {21,112} | CCOC1(C)CCN(CC1)c1nnnn1C(C)(C)C                  | 0  | 0  |
| 154 | <b>10</b> {21} | <b>11</b> {113} | <b>8</b> {21,113} | CC(C)(C)n1nnnc1N1CN(CC(F)(F)F)C(=O)C1            | 0  | 0  |
| 155 | <b>10</b> {21} | <b>11</b> {114} | <b>8</b> {21,114} | CC(C)(C)n1nnnc1N1CCCC(CC1)S(C)(=O)=O             | 0  | 0  |
| 156 | <b>10</b> {21} | <b>11</b> {115} | <b>8</b> {21,115} | CC(C)(C)n1nnnc1N1CCC2(C1)C(=O)Nc1ccccc21         | 28 | 13 |
| 157 | <b>10</b> {21} | <b>11</b> {116} | <b>8</b> {21,116} | CC(C)(C)n1nnnc1N1C[1C@@H]2CC[1C@H](O)C[1C@@H]2C1 | 31 | 16 |
| 158 | <b>10</b> {21} | <b>11</b> {117} | <b>8</b> {21,117} | CC(C)(C)n1nnnc1N1CCCC(CC(C)(C)C(N)=O)C1          | 8  | 4  |
| 159 | <b>10</b> {21} | <b>11</b> {118} | <b>8</b> {21,118} | C[1C@@H]1[1C@H](O)CCN1c1nnnn1C(C)(C)C            | 38 | 19 |
| 160 | <b>10</b> {21} | <b>11</b> {119} | <b>8</b> {21,119} | CCN(C1CCNC1=O)c1nnnn1C(C)(C)C                    | 0  | 0  |
| 161 | <b>10</b> {21} | <b>11</b> {120} | <b>8</b> {21,120} | CN1CCN(CC1CO)c1nnnn1C(C)(C)C                     | 0  | 0  |
| 162 | <b>10</b> {21} | <b>11</b> {121} | <b>8</b> {21,121} | Cc1nnc(N2CCN(CC2)c2nnnn2C(C)(C)C)n1C             | 0  | 0  |
| 163 | <b>10</b> {21} | <b>11</b> {122} | <b>8</b> {21,122} | CCN(CCO)c1nnnn1C(C)(C)C                          | 0  | 0  |
| 164 | <b>10</b> {21} | <b>11</b> {123} | <b>8</b> {21,123} | CC(C)(C)C1CN(CCO1)c1nnnn1C(C)(C)C                | 0  | 0  |

|     |        |         |           |                                                  |    |    |
|-----|--------|---------|-----------|--------------------------------------------------|----|----|
| 165 | 10{21} | 11{124} | 8{21,124} | Cc1cc(=O)[nH]c(n1)N1CCN(CC1)c1nnnn1C(C)(C)C      | 0  | 0  |
| 166 | 10{22} | 11{12}  | 8{22,12}  | Cn1cnc1C1CCCN(C1)c1nnnn1C1CCCC1                  | 0  | 0  |
| 167 | 10{22} | 11{2}   | 8{22,2}   | O=C(NC1CC1)C(=O)N1CCN(CC1)c1nnnn1C1CCCC1         | 24 | 22 |
| 168 | 10{22} | 11{10}  | 8{22,10}  | Cn1cccc1C(=O)N1CCN(CC1)c1nnnn1C1CCCC1            | 9  | 10 |
| 169 | 10{22} | 11{100} | 8{22,100} | O=S1CCN(CC1)c1nnnn1C1CCCC1                       | 0  | 0  |
| 170 | 10{23} | 11{38}  | 8{23,38}  | CC(c1cccc1)n1nnnc1N1CCc2nc[nH]c2C1               | 0  | 0  |
| 171 | 10{23} | 11{125} | 8{23,125} | CC(c1cccc1)n1nnnc1N(C)CC1(O)CCCC1                | 0  | 0  |
| 172 | 10{23} | 11{94}  | 8{23,94}  | CC(c1cccc1)n1nnnc1N(C)c1c(C)noc1C                | 33 | 18 |
| 173 | 10{23} | 11{126} | 8{23,126} | CC(c1cccc1)n1nnnc1N1CCN(Cc2nc[nH]n2)CC1          | 21 | 11 |
| 174 | 10{23} | 11{108} | 8{23,108} | CC(c1cccc1)n1nnnc1N1CCC(CC1)N1CCCC1=O            | 45 | 22 |
| 175 | 10{23} | 11{99}  | 8{23,99}  | CC(c1cccc1)n1nnnc1N1CCn2cnc2C1                   | 0  | 0  |
| 176 | 10{23} | 11{127} | 8{23,127} | CC(c1cccc1)n1nnnc1N1CCC[C@H]1C(N)=O              | 0  | 0  |
| 177 | 10{24} | 11{12}  | 8{24,12}  | CCC(C)n1nnnc1N1CCCC(C1)c1nncn1C                  | 0  | 0  |
| 178 | 10{25} | 11{8}   | 8{25,8}   | C(C1CC1)n1nnnc1N1CC2(CCOCC2)[1C@@H]2CCC[1C@H]12  | 0  | 0  |
| 179 | 10{25} | 11{1}   | 8{25,1}   | CNS(=O)(=O)c1cccc2CN(Cc12)c1nnnn1CC1CC1          | 26 | 24 |
| 180 | 10{26} | 11{7}   | 8{26,7}   | CC1=C(C)CN(CC1)c1nnnn1CC(F)(F)F                  | 0  | 0  |
| 181 | 10{26} | 11{4}   | 8{26,4}   | FC(F)(F)Cn1nnnc1N1CCOC2(CCC2)C1                  | 0  | 0  |
| 182 | 10{26} | 11{10}  | 8{26,10}  | Cn1cccc1C(=O)N1CCN(CC1)c1nnnn1CC(F)(F)F          | 0  | 0  |
| 183 | 10{26} | 11{5}   | 8{26,5}   | Fc1cc(F)cc(c1)C1COCCN1c1nnnn1CC(F)(F)F           | 0  | 0  |
| 184 | 10{26} | 11{6}   | 8{26,6}   | Fc1ccc2CN(CCOc2c1)c1nnnn1CC(F)(F)F               | 0  | 0  |
| 185 | 10{26} | 11{8}   | 8{26,8}   | FC(F)(F)Cn1nnnc1N1CC2(CCOCC2)[1C@@H]2CCC[1C@H]12 | 27 | 29 |



|     |        |         |           |                                                    |    |    |
|-----|--------|---------|-----------|----------------------------------------------------|----|----|
| 186 | 10{27} | 11{128} | 8{27,128} | CCOC(=O)N1CCC(CC1)n1nnnc1N1CCCC(C1)C1CC1           | 13 | 15 |
| 187 | 10{27} | 11{7}   | 8{27,7}   | CCOC(=O)N1CCC(CC1)n1nnnc1N1CCC(C)=C(C)C1           | 0  | 0  |
| 188 | 10{28} | 11{129} | 8{28,129} | C[C@@H](O)CN(C)c1nnnn1C(C)c1ccc(Br)cc1             | 13 | 7  |
| 189 | 10{29} | 11{130} | 8{29,130} | CCC1CCCN1c1nnnn1C1CCN(Cc2ccccc2)CC1                | 21 | 11 |
| 190 | 10{30} | 11{36}  | 8{30,36}  | O[C@H]1CCN(C1)c1nnnn1CCc1ccc(Cl)cc1Cl              | 24 | 12 |
| 191 | 10{30} | 11{131} | 8{30,131} | OCC1C=CCN1c1nnnn1CCc1ccc(Cl)cc1Cl                  | 0  | 0  |
| 192 | 10{31} | 11{7}   | 8{31,7}   | CCOCCn1nnnc1N1CCC(C)=C(C)C1                        | 0  | 0  |
| 193 | 10{32} | 11{132} | 8{32,132} | CC(C)(C)C1=CCN(CC1)c1nnnn1CCc1cccn1                | 0  | 0  |
| 194 | 10{32} | 11{133} | 8{32,133} | CC1(C)CCCN1c1nnnn1CCc1cccn1                        | 16 | 9  |
| 195 | 10{32} | 11{104} | 8{32,104} | C(Cn1nnnc1N1CCOCC2(CCCC2)C1)c1cccn1                | 0  | 0  |
| 196 | 10{32} | 11{134} | 8{32,134} | CN(C)C(=O)NC1CCCN(C1)c1nnnn1CCc1cccn1              | 0  | 0  |
| 197 | 10{32} | 11{135} | 8{32,135} | FC(F)(F)[C@@H]1CCCN(C1)c1nnnn1CCc1cccn1            | 0  | 0  |
| 198 | 10{32} | 11{136} | 8{32,136} | CC(C)NC(=O)[C@@H]1CCCN(C1)c1nnnn1CCc1cccn1         | 0  | 0  |
| 199 | 10{32} | 11{137} | 8{32,137} | CCN1CCC2CCC(C1)N2c1nnnn1CCc1cccn1                  | 0  | 0  |
| 200 | 10{32} | 11{99}  | 8{32,99}  | C(Cn1nnnc1N1CCn2cncc2C1)c1cccn1                    | 0  | 0  |
| 201 | 10{32} | 11{116} | 8{32,116} | O[1C@@H]1CC[1C@@H]2CN(C[1C@@H]2C1)c1nnnn1CCc1cccn1 | 0  | 0  |
| 202 | 10{32} | 11{138} | 8{32,138} | Clc1ccc2CCN(Cc12)c1nnnn1CCc1cccn1                  | 0  | 0  |
| 203 | 10{32} | 11{139} | 8{32,139} | Fc1ccc2CCN(c3nnnn3CCc3cccn3)c12                    | 0  | 0  |
| 204 | 10{32} | 11{140} | 8{32,140} | CN(c1cnn(C)c1)c1nnnn1CCc1cccn1                     | 0  | 0  |
| 205 | 10{32} | 11{141} | 8{32,141} | O=C1CC2(CN1)CCN(CC2)c1nnnn1CCc1cccn1               | 0  | 0  |
| 206 | 10{32} | 11{142} | 8{32,142} | C(Cn1nnnc1N1CCC(CC1)c1cn[nH]c1)c1cccn1             | 0  | 0  |

|     |        |         |           |                                             |    |    |
|-----|--------|---------|-----------|---------------------------------------------|----|----|
| 207 | 10{32} | 11{143} | 8{32,143} | CN(c1ccn(C)n1)c1nnnn1CCc1cccn1              | 0  | 0  |
| 208 | 10{32} | 11{144} | 8{32,144} | C(Cn1nnnc1N1CCN2CCOCC2C1)c1cccn1            | 0  | 0  |
| 209 | 10{32} | 11{145} | 8{32,145} | Cc1cccc2CCN(Cc12)c1nnnn1CCc1cccn1           | 0  | 0  |
| 210 | 10{32} | 11{4}   | 8{32,4}   | C(Cn1nnnc1N1CCOC2(CCC2)C1)c1cccn1           | 0  | 0  |
| 211 | 10{32} | 11{146} | 8{32,146} | C(Cn1nnnc1N1CCCC1c1ccn[nH]1)c1cccn1         | 0  | 0  |
| 212 | 10{32} | 11{147} | 8{32,147} | Clc1enn(c1)C1CCN(C1)c1nnnn1CCc1cccn1        | 0  | 0  |
| 213 | 10{32} | 11{148} | 8{32,148} | Cc1csc(n1)C1CCN(C1)c1nnnn1CCc1cccn1         | 0  | 0  |
| 214 | 10{32} | 11{149} | 8{32,149} | C(Cn1nnnc1N1CCCC1c1ccncc1)c1cccn1           | 0  | 0  |
| 215 | 10{33} | 11{150} | 8{33,150} | CC1CN(CC(=O)N1)c1nnnn1Cc1cccc(c1)C(F)(F)F   | 19 | 9  |
| 216 | 10{33} | 11{143} | 8{33,143} | CN(c1ccn(C)n1)c1nnnn1Cc1cccc(c1)C(F)(F)F    | 0  | 0  |
| 217 | 10{33} | 11{99}  | 8{33,99}  | FC(F)(F)c1cccc(Cn2nnnc2N2CCn3cncc3C2)c1     | 0  | 0  |
| 218 | 10{33} | 11{140} | 8{33,140} | CN(c1enn(C)c1)c1nnnn1Cc1cccc(c1)C(F)(F)F    | 0  | 0  |
| 219 | 10{33} | 11{73}  | 8{33,73}  | FC(F)(F)c1cccc(Cn2nnnc2N2CCc3cn[nH]c3C2)c1  | 0  | 0  |
| 220 | 10{34} | 11{151} | 8{34,151} | CC1COCCN(C1)c1nnnn1CCc1ccc2OCCOc2c1         | 24 | 11 |
| 221 | 10{34} | 11{152} | 8{34,152} | FC1CCN(CC1)c1nnnn1CCc1ccc2OCCOc2c1          | 21 | 11 |
| 222 | 10{34} | 11{153} | 8{34,153} | CN(C)C1CCN(C1)c1nnnn1CCc1ccc2OCCOc2c1       | 0  | 0  |
| 223 | 10{35} | 11{154} | 8{35,154} | CS(=O)(=O)NCCn1nnnc1N1CCC(F)(CC1)C1CC1      | 0  | 0  |
| 224 | 10{35} | 11{155} | 8{35,155} | CS(=O)(=O)NCCn1nnnc1N1CCc2c1cccc2Cl         | 10 | 4  |
| 225 | 10{35} | 11{156} | 8{35,156} | CS(=O)(=O)NCCn1nnnc1N1CCC[C@@H](C1)C(F)(F)F | 0  | 0  |
| 226 | 10{35} | 11{157} | 8{35,157} | CC1(F)CCCN(C1)c1nnnn1CCNS(C)(=O)=O          | 0  | 0  |
| 227 | 10{35} | 11{158} | 8{35,158} | CS(=O)(=O)NCCn1nnnc1N1CCC(CC1)C(F)F         | 0  | 0  |

|     |        |         |           |                                         |     |    |
|-----|--------|---------|-----------|-----------------------------------------|-----|----|
| 228 | 10{35} | 11{159} | 8{35,159} | CS(=O)(=O)NCCn1nnnc1N1CCc2c1cccc2F      | 0   | 0  |
| 229 | 10{35} | 11{133} | 8{35,133} | CC1(C)CCCN1c1nnnn1CCNS(C)(=O)=O         | 0   | 0  |
| 230 | 10{35} | 11{160} | 8{35,160} | CS(=O)(=O)NCCn1nnnc1N1CCC2(CCCC2)CC1    | 0   | 0  |
| 231 | 10{36} | 11{161} | 8{36,161} | CC(N(C)c1nnnn1CC1CCC1)c1ccnc1           | 0   | 0  |
| 232 | 10{36} | 11{162} | 8{36,162} | C(C1CCC1)n1nnnc1N1CCCC(C1)c1nnc2CCcn12  | 0   | 0  |
| 233 | 10{36} | 11{163} | 8{36,163} | Cc1cccc(n1)C1CCCN1c1nnnn1CC1CCC1        | 15  | 7  |
| 234 | 10{36} | 11{164} | 8{36,164} | C(C1CCC1)n1nnnc1N1CC[C@H](C1)Oc1cccc1   | 117 | 64 |
| 235 | 10{36} | 11{165} | 8{36,165} | C(C1CCN(CC1)c1nnnn1CC1CCC1)N1CCOCC1     | 53  | 28 |
| 236 | 10{36} | 11{94}  | 8{36,94}  | CN(c1nnnn1CC1CCC1)c1c(C)noc1C           | 15  | 8  |
| 237 | 10{37} | 11{166} | 8{37,166} | OC1CCOC2(CCN(CC2)c2nnnn2CCc2ccnc2)C1    | 0   | 0  |
| 238 | 10{37} | 11{59}  | 8{37,59}  | Oc1ccc2CN(Cc2c1)c1nnnn1CCc1ccnc1        | 0   | 0  |
| 239 | 10{37} | 11{167} | 8{37,167} | C(Cn1nnnc1N1CCCC1c1ncccn1)c1ccnc1       | 0   | 0  |
| 240 | 10{37} | 11{168} | 8{37,168} | C(Cn1nnnc1N1CCOC(C1)c1cco1)c1ccnc1      | 0   | 0  |
| 241 | 10{37} | 11{169} | 8{37,169} | C(Cn1nnnc1N1CCC2(CCC2)C1)c1ccnc1        | 7   | 4  |
| 242 | 10{37} | 11{64}  | 8{37,64}  | FC1(F)COCCN(C1)c1nnnn1CCc1ccnc1         | 0   | 0  |
| 243 | 10{37} | 11{104} | 8{37,104} | C(Cn1nnnc1N1CCOCC2(CCCC2)C1)c1ccnc1     | 0   | 0  |
| 244 | 10{37} | 11{170} | 8{37,170} | C(Cn1nnnc1N1CCCC(C1)C1CCOCC1)c1ccnc1    | 0   | 0  |
| 245 | 10{37} | 11{171} | 8{37,171} | C(Cn1nnnc1N1CCC(C1)n1cccn1)c1ccnc1      | 0   | 0  |
| 246 | 10{37} | 11{135} | 8{37,135} | FC(F)(F)[C@@H]1CCCN(C1)c1nnnn1CCc1ccnc1 | 0   | 0  |
| 247 | 10{37} | 11{172} | 8{37,172} | COC1CCCN(CC1)c1nnnn1CCc1ccnc1           | 0   | 0  |
| 248 | 10{37} | 11{109} | 8{37,109} | Cn1nc2CCN(Cc2cc1=O)c1nnnn1CCc1ccnc1     | 0   | 0  |

|     |        |         |           |                                              |     |    |
|-----|--------|---------|-----------|----------------------------------------------|-----|----|
| 249 | 10{37} | 11{173} | 8{37,173} | O=C1CN(CCCN1)c1nnnn1CCc1ccnc1                | 0   | 0  |
| 250 | 10{37} | 11{174} | 8{37,174} | FC(F)[C@@H]1CCCN1c1nnnn1CCc1ccnc1            | 0   | 0  |
| 251 | 10{37} | 11{175} | 8{37,175} | Cn1ccc(n1)C1CCCN(C1)c1nnnn1CCc1ccnc1         | 0   | 0  |
| 252 | 10{38} | 11{176} | 8{38,176} | CC(c1cccs1)n1nnnc1N(C)Cc1enc(C)s1            | 0   | 0  |
| 253 | 10{38} | 11{177} | 8{38,177} | CC(C)C(=O)N1CCCN(CC1)c1nnnn1C(C)c1cccs1      | 0   | 0  |
| 254 | 10{38} | 11{178} | 8{38,178} | CC(c1cccs1)n1nnnc1N(C)Cc1ccoc1               | 0   | 0  |
| 255 | 10{38} | 11{142} | 8{38,142} | CC(c1cccs1)n1nnnc1N1CCC(CC1)c1cn[nH]c1       | 0   | 0  |
| 256 | 10{38} | 11{179} | 8{38,179} | CC(c1cccs1)n1nnnc1N1C[C@H]2[C@H](CO)[C@H]2C1 | 0   | 0  |
| 257 | 10{38} | 11{84}  | 8{38,84}  | CC(c1cccs1)n1nnnc1N(C)CC(=O)N1CCCC1          | 0   | 0  |
| 258 | 10{39} | 11{7}   | 8{39,7}   | CC1=C(C)CN(CC1)c1nnnn1CCS(C)(=O)=O           | 0   | 0  |
| 259 | 10{39} | 11{180} | 8{39,180} | CC(N(C)c1nnnn1CCS(C)(=O)=O)c1cccc(Cl)c1      | 0   | 0  |
| 260 | 10{39} | 11{181} | 8{39,181} | CN(c1nnnn1CCS(C)(=O)=O)c1cccc(C)c1           | 0   | 0  |
| 261 | 10{39} | 11{182} | 8{39,182} | CN(Cc1ccc(C)c(C)c1)c1nnnn1CCS(C)(=O)=O       | 0   | 0  |
| 262 | 10{39} | 11{183} | 8{39,183} | CC1(Cc2ccccc2)CCCN1c1nnnn1CCS(C)(=O)=O       | 0   | 0  |
| 263 | 10{39} | 11{6}   | 8{39,6}   | CS(=O)(=O)CCn1nnnc1N1CCOc2cc(F)ccc2C1        | 0   | 0  |
| 264 | 10{40} | 11{184} | 8{40,184} | COC1(CCCN(C1)c1nnnn1C1CCOCC1)C(F)(F)F        | 0   | 0  |
| 265 | 10{40} | 11{185} | 8{40,185} | CC1(C)CN(C1c1ccnc1)c1nnnn1C1CCOCC1           | 0   | 0  |
| 266 | 10{40} | 11{186} | 8{40,186} | CCn1ccc(CN(C)c2nnnn2C2CCOCC2)c1              | 0   | 0  |
| 267 | 10{40} | 11{187} | 8{40,187} | OC1(CCN(C1)c1nnnn1C1CCOCC1)C1CC1             | 32  | 16 |
| 268 | 10{40} | 11{188} | 8{40,188} | CCOC1CC2(C1)CCN(C2)c1nnnn1C1CCOCC1           | 112 | 57 |
| 269 | 10{40} | 11{189} | 8{40,189} | Cc1cccc(C2CCCN2c2nnnn2C2CCOCC2)c1C           | 66  | 31 |

|     |        |         |           |                                            |     |    |
|-----|--------|---------|-----------|--------------------------------------------|-----|----|
| 270 | 10{40} | 11{115} | 8{40,115} | O=C1Nc2ccccc2C11CCN(C1)c1nnnn1C1CCOCC1     | 27  | 13 |
| 271 | 10{40} | 11{190} | 8{40,190} | CC1(C)CN(Cc2ccccc2O1)c1nnnn1C1CCOCC1       | 41  | 21 |
| 272 | 10{40} | 11{191} | 8{40,191} | CC1(C)CN(CC(O1)C(F)(F)F)c1nnnn1C1CCOCC1    | 35  | 16 |
| 273 | 10{40} | 11{192} | 8{40,192} | CN(Cc1cccc(C)n1)c1nnnn1C1CCOCC1            | 84  | 41 |
| 274 | 10{40} | 11{193} | 8{40,193} | COc1cccc1C1CCN(C1)c1nnnn1C1CCOCC1          | 45  | 22 |
| 275 | 10{40} | 11{194} | 8{40,194} | O=S1(=O)CCN(Cc2ccccc12)c1nnnn1C1CCOCC1     | 113 | 54 |
| 276 | 10{40} | 11{195} | 8{40,195} | CCS(=O)(=O)C1CN(C1)c1nnnn1C1CCOCC1         | 18  | 9  |
| 277 | 10{40} | 11{196} | 8{40,196} | CC(C)Oc1ccc(cc1)N(C)c1nnnn1C1CCOCC1        | 0   | 0  |
| 278 | 10{40} | 11{197} | 8{40,197} | CC1CN(c2nnnn2C2CCOCC2)C(C)(C)C1            | 0   | 0  |
| 279 | 10{40} | 11{198} | 8{40,198} | CC(C)c1cc([nH]n1)C1CCCN(C1)c1nnnn1C1CCOCC1 | 0   | 0  |
| 280 | 10{40} | 11{199} | 8{40,199} | CN(Cc1nnc2CCn12)c1nnnn1C1CCOCC1            | 0   | 0  |
| 281 | 10{40} | 11{143} | 8{40,143} | CN(c1ccn(C)n1)c1nnnn1C1CCOCC1              | 0   | 0  |
| 282 | 10{40} | 11{200} | 8{40,200} | CN(Cc1cc2ccccc2[nH]1)c1nnnn1C1CCOCC1       | 0   | 0  |
| 283 | 10{40} | 11{201} | 8{40,201} | CC1CN(c2nnnn2C2CCOCC2)c2ccccc2O1           | 0   | 0  |
| 284 | 10{40} | 11{202} | 8{40,202} | C1CC1c1nc(n[nH]1)C1CCCN(C1)c1nnnn1C1CCOCC1 | 0   | 0  |
| 285 | 10{40} | 11{203} | 8{40,203} | Cc1nc([nH]c1C)C1CCN(CC1)c1nnnn1C1CCOCC1    | 0   | 0  |
| 286 | 10{40} | 11{204} | 8{40,204} | CN(CC1(O)CCC1)c1nnnn1C1CCOCC1              | 0   | 0  |
| 287 | 10{41} | 11{205} | 8{41,205} | OC1CCN(CC1(F)F)c1nnnn1CCc1cccs1            | 0   | 0  |
| 288 | 10{41} | 11{206} | 8{41,206} | CC1(C)CN(C1c1ccnec1)c1nnnn1CCc1cccs1       | 0   | 0  |
| 289 | 10{41} | 11{207} | 8{41,207} | C(Cn1nnc1N1CCC(CC1)n1ccn1)c1cccs1          | 0   | 0  |
| 290 | 10{41} | 11{208} | 8{41,208} | C(Cn1nnc1N1CCN(CC1)C1CCOCC1)c1cccs1        | 36  | 16 |

|     |        |         |           |                                                      |    |    |
|-----|--------|---------|-----------|------------------------------------------------------|----|----|
| 291 | 10{41} | 11{147} | 8{41,147} | <chem>Clc1enn(c1)C1CCN(C1)c1nnnn1CCc1cccs1</chem>    | 70 | 32 |
| 292 | 10{41} | 11{148} | 8{41,148} | <chem>Cc1csc(n1)C1CCN(C1)c1nnnn1CCc1cccs1</chem>     | 62 | 28 |
| 293 | 10{41} | 11{209} | 8{41,209} | <chem>CO[1C@@H]1CN(C[1C@H]1O)c1nnnn1CCc1cccs1</chem> | 48 | 23 |
| 294 | 10{41} | 11{210} | 8{41,210} | <chem>Oc1cccc2CN(Cc12)c1nnnn1CCc1cccs1</chem>        | 71 | 36 |
| 295 | 10{41} | 11{211} | 8{41,211} | <chem>C(Cn1nnnc1N1CCC(CC1)c1ccco1)c1cccs1</chem>     | 40 | 20 |
| 296 | 10{41} | 11{212} | 8{41,212} | <chem>FC(F)(F)C1CCN(CCO1)c1nnnn1CCc1cccs1</chem>     | 41 | 22 |
| 297 | 10{41} | 11{213} | 8{41,213} | <chem>CNC(=O)NC1CCN(CC1)c1nnnn1CCc1cccs1</chem>      | 46 | 22 |
| 298 | 10{41} | 11{214} | 8{41,214} | <chem>C(Cn1nnnc1N1CCC(CC1)C1CCCCO1)c1cccs1</chem>    | 54 | 28 |
| 299 | 10{41} | 11{215} | 8{41,215} | <chem>CCS(=O)(=O)CC(C)N(C)c1nnnn1CCc1cccs1</chem>    | 14 | 16 |
| 300 | 10{41} | 11{216} | 8{41,216} | <chem>CN([1C@@H]1CCC[1C@H]1O)c1nnnn1CCc1cccs1</chem> | 18 | 9  |
| 301 | 10{41} | 11{217} | 8{41,217} | <chem>Oc1ccc2CN(CCOc2c1)c1nnnn1CCc1cccs1</chem>      | 37 | 20 |
| 302 | 10{41} | 11{218} | 8{41,218} | <chem>Cc1encc(c1)C1CCCN1c1nnnn1CCc1cccs1</chem>      | 0  | 0  |
| 303 | 10{41} | 11{16}  | 8{41,16}  | <chem>O=C1NCCN1C1CCCN(C1)c1nnnn1CCc1cccs1</chem>     | 0  | 0  |
| 304 | 10{41} | 11{219} | 8{41,219} | <chem>C(Cn1nnnc1N1CCN(CC1)c1cccs1)c1cccs1</chem>     | 0  | 0  |
| 305 | 10{41} | 11{146} | 8{41,146} | <chem>C(Cn1nnnc1N1CCCC1c1cc[nH]1)c1cccs1</chem>      | 0  | 0  |
| 306 | 10{41} | 11{220} | 8{41,220} | <chem>CC1CCS(=O)(=O)CCN1c1nnnn1CCc1cccs1</chem>      | 0  | 0  |
| 307 | 10{41} | 11{68}  | 8{41,68}  | <chem>C(Cn1nnnc1N1CCCC(C1)c1cc[nH]1)c1cccs1</chem>   | 0  | 0  |
| 308 | 10{41} | 11{221} | 8{41,221} | <chem>C(Cn1nnnc1N1CCCC(C1)c1ccenc1)c1cccs1</chem>    | 0  | 0  |
| 309 | 10{41} | 11{222} | 8{41,222} | <chem>C(Cn1nnnc1N1CCCC(C1)c1ccncc1)c1cccs1</chem>    | 0  | 0  |
| 310 | 10{42} | 11{223} | 8{42,223} | <chem>CN(Cc1nnc(C)s1)c1nnnn1C1(C)CC1</chem>          | 0  | 0  |
| 311 | 10{42} | 11{224} | 8{42,224} | <chem>CNC(=O)C(C)CN(C)c1nnnn1C1(C)CC1</chem>         | 0  | 0  |

|     |        |         |           |                                           |    |    |
|-----|--------|---------|-----------|-------------------------------------------|----|----|
| 312 | 10{42} | 11{225} | 8{42,225} | CC1(CC1)n1nnnc1N1CCN(CC1)S(=O)(=O)C1CC1   | 10 | 4  |
| 313 | 10{42} | 11{226} | 8{42,226} | CC1(CC1)n1nnnc1N1CCC(CC1)C(=O)NCCO        | 41 | 19 |
| 314 | 10{42} | 11{227} | 8{42,227} | COc1ccc(cc1F)C1CCN(C1)c1nnnn1C1(C)CC1     | 93 | 46 |
| 315 | 10{42} | 11{228} | 8{42,228} | CC(C)(O)CN(C1CC1)c1nnnn1C1(C)CC1          | 4  | 2  |
| 316 | 10{42} | 11{229} | 8{42,229} | CC1(CC1)n1nnnc1N1CCC(CO)(C1)c1cccc1       | 6  | 3  |
| 317 | 10{42} | 11{230} | 8{42,230} | CN(C1CCN(C1)c1nnnn1C1(C)CC1)c1cccc1       | 24 | 13 |
| 318 | 10{42} | 11{193} | 8{42,193} | COc1cccc1C1CCN(C1)c1nnnn1C1(C)CC1         | 51 | 27 |
| 319 | 10{42} | 11{231} | 8{42,231} | CC1(CC1)n1nnnc1N1CCC(CC1)OCC(N)=O         | 83 | 45 |
| 320 | 10{42} | 11{232} | 8{42,232} | CCN(Cc1occc1C)c1nnnn1C1(C)CC1             | 29 | 15 |
| 321 | 10{42} | 11{233} | 8{42,233} | CC1(CC1)n1nnnc1N1CCCC1c1cnc(Br)c1         | 6  | 3  |
| 322 | 10{42} | 11{234} | 8{42,234} | CC1(CC1)n1nnnc1N1CCC(CS(C)(=O)=O)CC1      | 75 | 34 |
| 323 | 10{43} | 11{235} | 8{43,235} | CN(Cc1csen1)c1nnnn1C1CCOc2cccc12          | 0  | 0  |
| 324 | 10{43} | 11{178} | 8{43,178} | CN(Cc1ccoc1)c1nnnn1C1CCOc2cccc12          | 0  | 0  |
| 325 | 10{43} | 11{176} | 8{43,176} | CN(Cc1enc(C)s1)c1nnnn1C1CCOc2cccc12       | 0  | 0  |
| 326 | 10{43} | 11{236} | 8{43,236} | Oc1ccc2CCN(Cc2c1)c1nnnn1C1CCOc2cccc12     | 25 | 12 |
| 327 | 10{43} | 11{237} | 8{43,237} | CN(Cc1occc1C)c1nnnn1C1CCOc2cccc12         | 26 | 14 |
| 328 | 10{43} | 11{99}  | 8{43,99}  | C1CC(c2cccc2O1)n1nnnc1N1CCn2cnc2C1        | 0  | 0  |
| 329 | 10{43} | 11{94}  | 8{43,94}  | CN(c1nnnn1C1CCOc2cccc12)c1c(C)noc1C       | 0  | 0  |
| 330 | 10{44} | 11{238} | 8{44,238} | Clc1enn(c1)C1CCN(CC1)c1nnnn1C(C1CC1)C1CC1 | 0  | 0  |
| 331 | 10{44} | 11{73}  | 8{44,73}  | C1CC1C(C1CC1)n1nnnc1N1CCc2cn[nH]c2C1      | 0  | 0  |
| 332 | 10{44} | 11{142} | 8{44,142} | C1CC1C(C1CC1)n1nnnc1N1CCC(CC1)c1cn[nH]c1  | 0  | 0  |

|     |        |         |           |                                                            |    |    |
|-----|--------|---------|-----------|------------------------------------------------------------|----|----|
| 333 | 10{44} | 11{148} | 8{44,148} | Cc1csc(n1)C1CCN(C1)c1nnnn1C(C1CC1)C1CC1                    | 19 | 11 |
| 334 | 10{45} | 11{239} | 8{45,239} | FC(F)(F)Oc1ccc(Cn2nnnc2N2CC3CC2C=C3)cc1                    | 0  | 0  |
| 335 | 10{46} | 11{240} | 8{46,240} | CC(=O)NC1CCN(CC1)c1nnnn1C1CCc2cccc2C1                      | 24 | 12 |
| 336 | 10{46} | 11{84}  | 8{46,84}  | CN(CC(=O)N1CCCC1)c1nnnn1C1CCc2cccc2C1                      | 0  | 0  |
| 337 | 10{46} | 11{79}  | 8{46,79}  | NC(=O)[C@H]1CCCN1c1nnnn1C1CCc2cccc2C1                      | 0  | 0  |
| 338 | 10{46} | 11{40}  | 8{46,40}  | C1Cc2cccc2CC1n1nnnc1N1CCc2[nH]ncc2C1                       | 0  | 0  |
| 339 | 10{46} | 11{241} | 8{46,241} | Cc1enn(c1)C1CCN(C1)c1nnnn1C1CCc2cccc2C1                    | 0  | 0  |
| 340 | 10{46} | 11{116} | 8{46,116} | O[1C@@H]1CC[1C@@H]2CN(C[1C@@H]2C1)c1nnnn1C1<br>CCc2cccc2C1 | 0  | 0  |
| 341 | 10{46} | 11{143} | 8{46,143} | CN(c1ccn(C)n1)c1nnnn1C1CCc2cccc2C1                         | 0  | 0  |
| 342 | 10{46} | 11{81}  | 8{46,81}  | NC(=O)C1CN(CCO1)c1nnnn1C1CCc2cccc2C1                       | 0  | 0  |
| 343 | 10{47} | 11{10}  | 8{47,10}  | Cn1cccc1C(=O)N1CCN(CC1)c1nnnn1CC(C)(C)C                    | 0  | 0  |
| 344 | 10{47} | 11{12}  | 8{47,12}  | Cn1ennc1C1CCCN(C1)c1nnnn1CC(C)(C)C                         | 0  | 0  |
| 345 | 10{48} | 11{7}   | 8{48,7}   | CSCCN1nnnc1N1CCC(C)=C(C)C1                                 | 0  | 0  |
| 346 | 10{48} | 11{8}   | 8{48,8}   | CSCCN1nnnc1N1CC2(CCOCC2)[1C@@H]2CCC[1C@@H]12               | 20 | 20 |
| 347 | 10{49} | 11{81}  | 8{49,81}  | CC(Cc1cccc1)n1nnnc1N1CCOC(C1)C(N)=O                        | 0  | 0  |
| 348 | 10{49} | 11{143} | 8{49,143} | CC(Cc1cccc1)n1nnnc1N(C)c1ccn(C)n1                          | 22 | 11 |
| 349 | 10{49} | 11{242} | 8{49,242} | CCN(c1cnn(C)c1)c1nnnn1C(C)Cc1cccc1                         | 12 | 6  |
| 350 | 10{49} | 11{143} | 8{49,143} | CC(Cc1cccc1)n1nnnc1N(C)c1ccn(C)n1                          | 12 | 6  |
| 351 | 10{49} | 11{242} | 8{49,242} | CCN(c1cnn(C)c1)c1nnnn1C(C)Cc1cccc1                         | 29 | 14 |
| 352 | 10{49} | 11{242} | 8{49,242} | CCN(c1cnn(C)c1)c1nnnn1C(C)Cc1cccc1                         | 0  | 0  |
| 353 | 10{49} | 11{140} | 8{49,140} | CC(Cc1cccc1)n1nnnc1N(C)c1cnn(C)c1                          | 0  | 0  |



|     |        |         |           |                                                     |    |    |
|-----|--------|---------|-----------|-----------------------------------------------------|----|----|
| 354 | 10{49} | 11{243} | 8{49,243} | CC(Cc1ccccc1)n1nnnc1N1CCC=C(C1)c1cnn(C)c1           | 0  | 0  |
| 355 | 10{49} | 11{143} | 8{49,143} | CC(Cc1ccccc1)n1nnnc1N(C)c1ccn(C)n1                  | 0  | 0  |
| 356 | 10{49} | 11{73}  | 8{49,73}  | CC(Cc1ccccc1)n1nnnc1N1CCc2cn[nH]c2C1                | 0  | 0  |
| 357 | 10{49} | 11{99}  | 8{49,99}  | CC(Cc1ccccc1)n1nnnc1N1CCn2cncc2C1                   | 0  | 0  |
| 358 | 10{49} | 11{79}  | 8{49,79}  | CC(Cc1ccccc1)n1nnnc1N1CCC[C@@H]1C(N)=O              | 0  | 0  |
| 359 | 10{49} | 11{244} | 8{49,244} | CC(Cc1ccccc1)n1nnnc1N1[1C@@H]2CC[1C@H]1CN(C)CC<br>2 | 0  | 0  |
| 360 | 10{49} | 11{140} | 8{49,140} | CC(Cc1ccccc1)n1nnnc1N(C)c1cnn(C)c1                  | 0  | 0  |
| 361 | 10{50} | 11{245} | 8{50,245} | C[C@H]1COCCN1c1nnnn1Cc1ccc(Br)cc1                   | 7  | 7  |
| 362 | 10{50} | 11{118} | 8{50,118} | C[1C@@H]1[1C@H](O)CCN1c1nnnn1Cc1ccc(Br)cc1          | 15 | 15 |
| 363 | 10{50} | 11{246} | 8{50,246} | BrC1ccc(Cn2nnnc2N2CCCC(C2)C#N)cc1                   | 0  | 0  |
| 364 | 10{51} | 11{247} | 8{51,247} | CN(Cc1cccc(=O)[nH]1)c1nnnn1CC1CCOC1                 | 0  | 0  |
| 365 | 10{51} | 11{248} | 8{51,248} | C(C1CCOC1)n1nnnc1N1CCC[C@H]1c1ncn[nH]1              | 0  | 0  |
| 366 | 10{51} | 11{249} | 8{51,249} | COC[C@H]1C[C@@H](O)CN1c1nnnn1CC1CCOC1               | 0  | 0  |
| 367 | 10{51} | 11{244} | 8{51,244} | CN1CC[1C@@H]2CC[1C@H](C1)N2c1nnnn1CC1CCOC1          | 0  | 0  |
| 368 | 10{51} | 11{250} | 8{51,250} | CC(C)[C@H]1CN(CCN1C)c1nnnn1CC1CCOC1                 | 0  | 0  |
| 369 | 10{51} | 11{43}  | 8{51,43}  | CN([C@H]1C[C@H](C1)C(N)=O)c1nnnn1CC1CCOC1           | 39 | 19 |
| 370 | 10{51} | 11{251} | 8{51,251} | CN1CCN(Cc2ccnc12)c1nnnn1CC1CCOC1                    | 93 | 46 |
| 371 | 10{52} | 11{252} | 8{52,252} | NC(=O)C1N(CCc2ccccc12)c1nnnn1C1CCC1                 | 0  | 0  |
| 372 | 10{52} | 11{222} | 8{52,222} | C1CC(C1)n1nnnc1N1CCCC(C1)c1ccccc1                   | 0  | 0  |
| 373 | 10{52} | 11{1}   | 8{52,1}   | CNS(=O)(=O)c1cccc2CN(CCc12)c1nnnn1C1CCC1            | 14 | 16 |
| 374 | 10{52} | 11{253} | 8{52,253} | CC1CCN(CCS1(=O)=O)c1nnnn1C1CCC1                     | 18 | 9  |

|     |        |         |           |                                                        |    |    |
|-----|--------|---------|-----------|--------------------------------------------------------|----|----|
| 375 | 10{52} | 11{254} | 8{52,254} | O[1C@@H]1CN(C[1C@H]1Oc1cccc1)c1nnnn1C1CCC1             | 27 | 14 |
| 376 | 10{52} | 11{255} | 8{52,255} | CC1CN(CCS(=O)(=O)C1)c1nnnn1C1CCC1                      | 21 | 10 |
| 377 | 10{52} | 11{256} | 8{52,256} | CC1(C)CN([1C@@H]2COC[1C@H]12)c1nnnn1C1CCC1             | 43 | 22 |
| 378 | 10{52} | 11{220} | 8{52,220} | CC1CCS(=O)(=O)CCN1c1nnnn1C1CCC1                        | 8  | 4  |
| 379 | 10{53} | 11{127} | 8{53,127} | NC(=O)[C@@H]1CCCN1c1nnnn1CCc1ccc(F)cc1                 | 0  | 0  |
| 380 | 10{53} | 11{257} | 8{53,257} | Fc1ccc(CCN2nnnc2N2CCC(CC2)c2nnc[nH]2)cc1               | 0  | 0  |
| 381 | 10{53} | 11{258} | 8{53,258} | Fc1ccc(CCN2nnnc2N2CCC(CC2)c2ncc[nH]2)cc1               | 0  | 0  |
| 382 | 10{53} | 11{259} | 8{53,259} | CC1CN(CCN(C1)c1nnnn1CCc1ccc(F)cc1)C1CC1                | 0  | 0  |
| 383 | 10{53} | 11{260} | 8{53,260} | Fc1ccc(CCN2nnnc2N2CCC(C2)N2CCCCC2)cc1                  | 0  | 0  |
| 384 | 10{53} | 11{205} | 8{53,205} | OC1CCN(CC1(F)F)c1nnnn1CCc1ccc(F)cc1                    | 6  | 3  |
| 385 | 10{53} | 11{68}  | 8{53,68}  | Fc1ccc(CCN2nnnc2N2CCCC(C2)c2ccn[nH]2)cc1               | 0  | 0  |
| 386 | 10{53} | 11{236} | 8{53,236} | Oc1ccc2CCN(Cc2c1)c1nnnn1CCc1ccc(F)cc1                  | 47 | 23 |
| 387 | 10{53} | 11{4}   | 8{53,4}   | Fc1ccc(CCN2nnnc2N2CCOC3(CCC3)C2)cc1                    | 0  | 0  |
| 388 | 10{53} | 11{57}  | 8{53,57}  | Fc1ccc(CCN2nnnc2N2CCCCc3n[nH]cc23)cc1                  | 0  | 0  |
| 389 | 10{53} | 11{261} | 8{53,261} | Fc1ccc(CCN2nnnc2N2CCC(CC2)C2CCCO2)cc1                  | 41 | 19 |
| 390 | 10{53} | 11{140} | 8{53,140} | CN(c1cnn(C)c1)c1nnnn1CCc1ccc(F)cc1                     | 0  | 0  |
| 391 | 10{53} | 11{73}  | 8{53,73}  | Fc1ccc(CCN2nnnc2N2CCc3cn[nH]c3C2)cc1                   | 6  | 3  |
| 392 | 10{53} | 11{116} | 8{53,116} | O[1C@@H]1CC[1C@@H]2CN(C[1C@@H]2C1)c1nnnn1CCc1ccc(F)cc1 | 23 | 12 |
| 393 | 10{53} | 11{249} | 8{53,249} | COC[C@H]1C[C@@H](O)CN1c1nnnn1CCc1ccc(F)cc1             | 11 | 12 |
| 394 | 10{54} | 11{27}  | 8{54,27}  | C(C1CCCCO1)n1nnnc1N1CCC(CC1)c1ccncc1                   | 0  | 0  |
| 395 | 10{54} | 11{90}  | 8{54,90}  | C(N1CCN(CC1)c1nnnn1CC1CCCCO1)c1csen1                   | 12 | 5  |

|     |        |         |           |                                           |    |    |
|-----|--------|---------|-----------|-------------------------------------------|----|----|
| 396 | 10{55} | 11{262} | 8{55,262} | CC(C)N1CCC(C1)N(C)c1nnnn1Cc1cc(C)on1      | 0  | 0  |
| 397 | 10{55} | 11{156} | 8{55,156} | Cc1cc(Cn2nnnc2N2CCC[C@@H](C2)C(F)(F)F)no1 | 0  | 0  |
| 398 | 10{55} | 11{263} | 8{55,263} | CCc1cccc(c1)N(C)c1nnnn1Cc1cc(C)on1        | 41 | 20 |
| 399 | 10{55} | 11{264} | 8{55,264} | CC1N(CCc2cccc12)c1nnnn1Cc1cc(C)on1        | 35 | 18 |
| 400 | 10{55} | 11{265} | 8{55,265} | Cc1cc(Cn2nnnc2N2CCC(Cc3cnn(C)c3)C2)no1    | 25 | 12 |
| 401 | 10{56} | 11{266} | 8{56,266} | Fc1cccc(OC2CCN(CC2)c2nnnn2Cc2ccon2)c1     | 0  | 0  |
| 402 | 10{56} | 11{101} | 8{56,101} | CN(Cc1ccc(C)s1)c1nnnn1Cc1ccon1            | 0  | 0  |
| 403 | 10{56} | 11{267} | 8{56,267} | CC(N(C)c1nnnn1Cc1ccon1)c1ccncc1           | 0  | 0  |
| 404 | 10{56} | 11{268} | 8{56,268} | C(c1ccon1)n1nnnc1N1CCCc2sccc2C1           | 0  | 0  |
| 405 | 10{56} | 11{94}  | 8{56,94}  | CN(c1nnnn1Cc1ccon1)c1c(C)noc1C            | 0  | 0  |
| 406 | 10{56} | 11{176} | 8{56,176} | CN(Cc1cnc(C)s1)c1nnnn1Cc1ccon1            | 0  | 0  |
| 407 | 10{56} | 11{269} | 8{56,269} | Clc1cccc(c1)C1CCCN1c1nnnn1Cc1ccon1        | 0  | 0  |
| 408 | 10{56} | 11{6}   | 8{56,6}   | Fc1ccc2CN(CCOc2c1)c1nnnn1Cc1ccon1         | 0  | 0  |
| 409 | 10{56} | 11{270} | 8{56,270} | CN(C1Cc2cccc2C1)c1nnnn1Cc1ccon1           | 21 | 9  |
| 410 | 10{56} | 11{165} | 8{56,165} | C(C1CCN(CC1)c1nnnn1Cc1ccon1)N1CCOCC1      | 20 | 10 |
| 411 | 10{56} | 11{48}  | 8{56,48}  | Cc1ccnc(c1)N1CCN(CC1)c1nnnn1Cc1ccon1      | 8  | 4  |
| 412 | 10{56} | 11{271} | 8{56,271} | CC(N(C)c1nnnn1Cc1ccon1)c1cccc1F           | 59 | 28 |
| 413 | 10{56} | 11{4}   | 8{56,4}   | C(c1ccon1)n1nnnc1N1CCOC2(CCC2)C1          | 18 | 19 |
| 414 | 10{56} | 11{108} | 8{56,108} | O=C1CCCN1C1CCN(CC1)c1nnnn1Cc1ccon1        | 89 | 43 |
| 415 | 10{57} | 11{7}   | 8{57,7}   | CC1=C(C)CN(CC1)c1nnnn1CC(F)F              | 0  | 0  |
| 416 | 10{57} | 11{4}   | 8{57,4}   | FC(F)Cn1nnnc1N1CCOC2(CCC2)C1              | 0  | 0  |

|     |        |         |           |                                               |     |    |
|-----|--------|---------|-----------|-----------------------------------------------|-----|----|
| 417 | 10{57} | 11{2}   | 8{57,2}   | FC(F)Cn1nnnc1N1CCN(CC1)C(=O)C(=O)NC1CC1       | 0   | 0  |
| 418 | 10{57} | 11{8}   | 8{57,8}   | FC(F)Cn1nnnc1N1CC2(CCOCC2)[1C@@H]2CCC[1C@H]12 | 28  | 27 |
| 419 | 10{58} | 11{272} | 8{58,272} | CC1(CCC1)n1nnnc1N1CCCC(C1)c1cccc1             | 0   | 0  |
| 420 | 10{58} | 11{273} | 8{58,273} | CCN(CC(N)=O)c1nnnn1C1(C)CCC1                  | 0   | 0  |
| 421 | 10{58} | 11{274} | 8{58,274} | CC1(CCC1)n1nnnc1N1CCC(CN2CCCC2)C1             | 0   | 0  |
| 422 | 10{58} | 11{127} | 8{58,127} | CC1(CCC1)n1nnnc1N1CCC[C@H]1C(N)=O             | 0   | 0  |
| 423 | 10{58} | 11{275} | 8{58,275} | CC1(CCC1)n1nnnc1N1CCC(Cc2ccnc2)CC1            | 0   | 0  |
| 424 | 10{58} | 11{276} | 8{58,276} | CC1CN(CCN1CC(C)(C)O)c1nnnn1C1(C)CCC1          | 17  | 8  |
| 425 | 10{58} | 11{277} | 8{58,277} | CC1(CCC1)n1nnnc1N1CCC(CO)(C1)C(F)(F)F         | 38  | 19 |
| 426 | 10{58} | 11{278} | 8{58,278} | CC1(CCC1)n1nnnc1N1CCC2(CCOCC2)C1              | 21  | 11 |
| 427 | 10{58} | 11{187} | 8{58,187} | CC1(CCC1)n1nnnc1N1CCC(O)(C1)C1CC1             | 15  | 7  |
| 428 | 10{58} | 11{279} | 8{58,279} | Cc1enc(OC2CCN(CC2)c2nnnn2C2(C)CCC2)nc1        | 19  | 10 |
| 429 | 10{58} | 11{280} | 8{58,280} | CC1(CCC1)n1nnnc1N1CCCN(CC1)c1ncccc1F          | 106 | 52 |
| 430 | 10{58} | 11{192} | 8{58,192} | CN(Cc1cccc(C)n1)c1nnnn1C1(C)CCC1              | 51  | 22 |

**Table S5.** Parallel synthesis of 5-aminotetrazoles **9**

| #  | Primary amine | Secondary amine | Product          | SMILE                                                       | Yield, mg | Yield, % |
|----|---------------|-----------------|------------------|-------------------------------------------------------------|-----------|----------|
| 1  | <b>15</b> {1} | <b>11</b> {281} | <b>9</b> {1,281} | <chem>CC(C)n1nnnc1N1CCC(CC1)OCC1CC1</chem>                  | 11        | 5        |
| 2  | <b>15</b> {2} | <b>11</b> {282} | <b>9</b> {2,282} | <chem>CC(=O)N1CCN(CC11CCCCC1)c1nnnn1Cc1ccc</chem>           | 0         | 0        |
| 3  | <b>15</b> {2} | <b>11</b> {283} | <b>9</b> {2,283} | <chem>o1C(c1ccc1)n1nnnc1N1Cc2cccc2OC2(CCC2)C1</chem>        | 0         | 0        |
| 4  | <b>15</b> {2} | <b>11</b> {284} | <b>9</b> {2,284} | <chem>CC1(C)CN(CCO1)c1nnnn1Cc1ccc1</chem>                   | 9         | 4        |
| 5  | <b>15</b> {2} | <b>11</b> {285} | <b>9</b> {2,285} | <chem>Cc1nc(no1)C1CC2CCC(C1)N2c1nnnn1Cc1ccc1</chem>         | 0         | 0        |
| 6  | <b>15</b> {2} | <b>11</b> {286} | <b>9</b> {2,286} | <chem>1C(c1ccc1)n1nnnc1N1CCC2(CC1)OCc1cccc21</chem>         | 0         | 0        |
| 7  | <b>15</b> {2} | <b>11</b> {287} | <b>9</b> {2,287} | <chem>O=C(N1CCN(CC1)c1nnnn1Cc1ccc1)c1ccc1</chem>            | 0         | 0        |
| 8  | <b>15</b> {3} | <b>11</b> {288} | <b>9</b> {3,288} | <chem>CC(=O)N1CCCN(CC1)c1nnnn1Cc1ccc2OCOC2</chem>           | 0         | 0        |
| 9  | <b>15</b> {4} | <b>11</b> {289} | <b>9</b> {4,289} | <chem>c1COCCn1nnnc1N1CCC(CC1)c1nc2cccc2s1</chem>            | 111       | 46       |
| 10 | <b>15</b> {4} | <b>11</b> {290} | <b>9</b> {4,290} | <chem>COCCn1nnnc1N1CCN(C(C)C1)C(=O)OC(C)(C)</chem>          | 18        | 10       |
| 11 | <b>15</b> {4} | <b>11</b> {291} | <b>9</b> {4,291} | <chem>C COCCn1nnnc1N1CCN(CC1)C(=O)c1ccc(F)cc1</chem>        | 70        | 33       |
| 12 | <b>15</b> {4} | <b>11</b> {292} | <b>9</b> {4,292} | <chem>C(C)(C)C COCCn1nnnc1N1CCN([C@@H](C)C1)C(=O)O</chem>   | 26        | 12       |
| 13 | <b>15</b> {4} | <b>11</b> {293} | <b>9</b> {4,293} | <chem>COCCn1nnnc1N1[C@H]2CC[C@@H]1C[C@@H](C2)c1cccc1</chem> | 0         | 0        |
| 14 | <b>15</b> {4} | <b>11</b> {287} | <b>9</b> {4,287} | <chem>COCCn1nnnc1N1CCN(CC1)C(=O)c1ccc1</chem>               | 40        | 22       |
| 15 | <b>15</b> {4} | <b>11</b> {294} | <b>9</b> {4,294} | <chem>COCCn1nnnc1N1CCN(CC1)c1cccc1Cl</chem>                 | 6         | 3        |
| 16 | <b>15</b> {4} | <b>11</b> {295} | <b>9</b> {4,295} | <chem>COCCn1nnnc1N1CCN(CC1)C(=O)OCc1cccc1</chem>            | 38        | 17       |
| 17 | <b>15</b> {4} | <b>11</b> {296} | <b>9</b> {4,296} | <chem>C(C)(C)C COCCn1nnnc1N1CCN([C@H](C)C1)C(=O)OC(</chem>  | 12        | 6        |

|    |        |         |           |                                             |    |    |
|----|--------|---------|-----------|---------------------------------------------|----|----|
| 18 | 15{5}  | 11{297} | 9{5,297}  | CCCCn1nnnc1N1CCC(CC1)C1(C)OCCO1             | 7  | 4  |
| 19 | 15{5}  | 11{298} | 9{5,298}  | CCCCn1nnnc1N1CCCC(C1)C1(C)OCCO1             | 8  | 4  |
| 20 | 15{6}  | 11{299} | 9{6,299}  | COC1(CO)CCN(CC1)c1nnnn1Cc1ccc(Cl)cc1        | 46 | 24 |
| 21 | 15{6}  | 11{300} | 9{6,300}  | Clc1ccc(Cn2nnnc2N2CCCOCC2)cc1               | 54 | 28 |
| 22 | 15{7}  | 11{301} | 9{7,301}  | FC(F)CN1CCN(CC1)c1nnnn1Cc1cccc1             | 15 | 7  |
| 23 | 15{8}  | 11{302} | 9{8,302}  | CN(CCOc1ccc(F)cc1)c1nnnn1CC1CCCO1           | 56 | 28 |
| 24 | 15{8}  | 11{303} | 9{8,303}  | CC1CCCN(C1C)c1nnnn1CC1CCCO1                 | 26 | 13 |
| 25 | 15{9}  | 11{297} | 9{9,297}  | COCCn1nnnc1N1CCC(CC1)C1(C)OCCO1             | 26 | 13 |
| 26 | 15{9}  | 11{298} | 9{9,298}  | COCCn1nnnc1N1CCCC(C1)C1(C)OCCO1             | 24 | 13 |
| 27 | 15{10} | 11{298} | 9{10,298} | CC(C)CCn1nnnc1N1CCCC(C1)C1(C)OCCO1          | 29 | 15 |
| 28 | 15{10} | 11{297} | 9{10,297} | CC(C)CCn1nnnc1N1CCC(CC1)C1(C)OCCO1          | 34 | 18 |
| 29 | 15{11} | 11{304} | 9{11,304} | CC(C)C(=O)NCC1CCCN(C1)c1nnnn1CC1CCC<br>CC1  | 20 | 10 |
| 30 | 15{12} | 11{305} | 9{12,305} | CC1CCCN(CC1)c1nnnn1CCCN(C)C                 | 0  | 0  |
| 31 | 15{13} | 11{306} | 9{13,306} | CC(C)(C)OC(=O)NCC1CCCN(C1)c1nnnn1CC=<br>C   | 0  | 0  |
| 32 | 15{13} | 11{307} | 9{13,307} | CN(CC1CCN(C1)c1nnnn1CC=C)C(=O)OC(C)(<br>C)C | 19 | 10 |
| 33 | 15{13} | 11{308} | 9{13,308} | CC(C)(C)OC(=O)NCC1CCN(CC1)c1nnnn1CC=<br>C   | 0  | 0  |
| 34 | 15{13} | 11{307} | 9{13,307} | CN(CC1CCN(C1)c1nnnn1CC=C)C(=O)OC(C)(<br>C)C | 0  | 0  |
| 35 | 15{13} | 11{309} | 9{13,309} | C=CCn1nnnc1N1CCC(CC1)n1c2cccc2[nH]c1=<br>O  | 56 | 30 |
| 36 | 15{13} | 11{310} | 9{13,310} | CC1CN(CCC1NC(=O)OC(C)(C)C)c1nnnn1CC=<br>C   | 0  | 0  |
| 37 | 15{13} | 11{309} | 9{13,309} | C=CCn1nnnc1N1CCC(CC1)n1c2cccc2[nH]c1=       | 0  | 0  |

|    |        |         |           | O                                                   |    |    |
|----|--------|---------|-----------|-----------------------------------------------------|----|----|
| 38 | 15{13} | 11{311} | 9{13,311} | CC(C)(C)OC(=O)N[C@H]1CCCN(C1)c1nnnn1<br>CC=C        | 0  | 0  |
| 39 | 15{13} | 11{306} | 9{13,306} | CC(C)(C)OC(=O)NCC1CCCN(C1)c1nnnn1CC=<br>C           | 16 | 9  |
| 40 | 15{13} | 11{311} | 9{13,311} | CC(C)(C)OC(=O)N[C@H]1CCCN(C1)c1nnnn1<br>CC=C        | 25 | 14 |
| 41 | 15{13} | 11{312} | 9{13,312} | CC(C)(C)OC(=O)NC1CCCN(C1)c1nnnn1CC=C                | 0  | 0  |
| 42 | 15{13} | 11{313} | 9{13,313} | CC(C)(C)OC(=O)N1C[C@H]2CN(C[C@H]2C1)<br>c1nnnn1CC=C | 0  | 0  |
| 43 | 15{13} | 11{313} | 9{13,313} | CC(C)(C)OC(=O)N1C[C@H]2CN(C[C@H]2C1)<br>c1nnnn1CC=C | 30 | 16 |
| 44 | 15{13} | 11{314} | 9{13,314} | CC(C)(C)OC(=O)N1CCCN(CC1)c1nnnn1CC=C                | 0  | 0  |
| 45 | 15{13} | 11{315} | 9{13,315} | CC(C)(C)OC(=O)N1C[C@@H]2C[C@H]1CN2c<br>1nnnn1CC=C   | 0  | 0  |
| 46 | 15{13} | 11{314} | 9{13,314} | CC(C)(C)OC(=O)N1CCCN(CC1)c1nnnn1CC=C                | 9  | 4  |
| 47 | 15{14} | 11{300} | 9{14,300} | COc1ccc(Cc2nnc2N2CCCOCC2)cc1                        | 53 | 25 |
| 48 | 15{14} | 11{299} | 9{14,299} | COc1ccc(Cc2nnc2N2CCC(CO)(CC2)OC)cc1                 | 32 | 16 |
| 49 | 15{15} | 11{110} | 9{15,110} | CN(CC1(O)CCOCC1)c1nnnn1Cc1cccc1Cl                   | 0  | 0  |
| 50 | 15{15} | 11{102} | 9{15,102} | CN(Cc1scnc1C)c1nnnn1Cc1cccc1Cl                      | 0  | 0  |
| 51 | 15{15} | 11{299} | 9{15,299} | COC1(CO)CCN(CC1)c1nnnn1Cc1cccc1Cl                   | 52 | 24 |
| 52 | 15{15} | 11{213} | 9{15,213} | CNC(=O)NC1CCN(CC1)c1nnnn1Cc1cccc1Cl                 | 0  | 0  |
| 53 | 15{15} | 11{300} | 9{15,300} | Clc1cccc1Cn1nnnc1N1CCCOCC1                          | 27 | 13 |
| 54 | 15{16} | 11{299} | 9{16,299} | COC1(CO)CCN(CC1)c1nnnn1Cc1cccc(Cl)c1                | 53 | 23 |
| 55 | 15{16} | 11{300} | 9{16,300} | Clc1cccc(Cn2nnc2N2CCCOCC2)c1                        | 45 | 23 |
| 56 | 15{17} | 11{316} | 9{17,316} | Fc1cccc(F)c1N1CCN(CC1)c1nnnn1C1CC1                  | 18 | 7  |

|    |        |         |           |                                              |    |    |
|----|--------|---------|-----------|----------------------------------------------|----|----|
| 57 | 15{18} | 11{299} | 9{18,299} | COc1ccc(Cn2nnnc2N2CCC(CO)(CC2)OC)cc1         | 46 | 22 |
| 58 | 15{18} | 11{300} | 9{18,300} | COc1ccc(Cn2nnnc2N2CCC(OCC2)cc1               | 63 | 31 |
| 59 | 15{19} | 11{317} | 9{19,317} | CN(Cc1ccc(C)o1)c1nnnn1C1CCCC1                | 18 | 10 |
| 60 | 15{19} | 11{288} | 9{19,288} | CC(=O)N1CCCN(CC1)c1nnnn1C1CCCC1              | 29 | 14 |
| 61 | 15{19} | 11{318} | 9{19,318} | C1CCC(C1)n1nnnc1N1CCn2c(C1)nnc2-<br>c1cccc1  | 0  | 0  |
| 62 | 15{20} | 11{319} | 9{20,319} | CN(CC1COCCO1)c1nnnn1CCc1c[nH]c2cccc12        | 20 | 9  |
| 63 | 15{20} | 11{300} | 9{20,300} | C(Cn1nnnc1N1CCCOCC1)c1c[nH]c2cccc12          | 0  | 0  |
| 64 | 15{21} | 11{300} | 9{21,300} | Clc1ccc(CCn2nnnc2N2CCCOCC2)cc1               | 52 | 26 |
| 65 | 15{21} | 11{320} | 9{21,320} | COC(=O)C1CCN(CC1)c1nnnn1CCc1ccc(Cl)cc1       | 38 | 19 |
| 66 | 15{22} | 11{321} | 9{22,321} | OCC1CCN(CC1)c1nnnn1Cc1ccc(Cl)cc1Cl           | 11 | 6  |
| 67 | 15{22} | 11{300} | 9{22,300} | Clc1ccc(Cn2nnnc2N2CCCOCC2)c(Cl)c1            | 39 | 21 |
| 68 | 15{23} | 11{300} | 9{23,300} | C(Cc1cccc1)Cn1nnnc1N1CCCOCC1                 | 32 | 15 |
| 69 | 15{23} | 11{299} | 9{23,299} | COC1(CO)CCN(CC1)c1nnnn1CCc1cccc1             | 47 | 23 |
| 70 | 15{24} | 11{322} | 9{24,322} | COc1ccc(Cn2nnnc2N(C)C2CC2)cc1OC              | 13 | 6  |
| 71 | 15{24} | 11{300} | 9{24,300} | COc1ccc(Cn2nnnc2N2CCCOCC2)cc1OC              | 11 | 6  |
| 72 | 15{25} | 11{147} | 9{25,147} | Clc1cnn(c1)C1CCN(C1)c1nnnn1CCC1=CCCC<br>1    | 63 | 30 |
| 73 | 15{25} | 11{323} | 9{25,323} | O=C1CN(Cc2cccc2N1)c1nnnn1CCC1=CCCC<br>1      | 0  | 0  |
| 74 | 15{25} | 11{324} | 9{25,324} | Cc1noc(n1)C1CCN(CC1)c1nnnn1CCC1=CCCC<br>C1   | 20 | 10 |
| 75 | 15{25} | 11{325} | 9{25,325} | O=c1[nH]ncn1C1CCN(CC1)c1nnnn1CCC1=CC<br>CCC1 | 0  | 0  |
| 76 | 15{25} | 11{288} | 9{25,288} | CC(=O)N1CCCN(CC1)c1nnnn1CCC1=CCCCC1          | 26 | 12 |



|    |        |         |           |                                                    |    |    |
|----|--------|---------|-----------|----------------------------------------------------|----|----|
| 77 | 15{26} | 11{326} | 9{26,326} | COc1ccccc1Cn1nnnc1N1CCC(=CC1)C(F)(F)F              | 13 | 5  |
| 78 | 15{26} | 11{299} | 9{26,299} | COc1ccccc1Cn1nnnc1N1CCC(CO)(CC1)OC                 | 45 | 22 |
| 79 | 15{26} | 11{300} | 9{26,300} | COc1ccccc1Cn1nnnc1N1CCCOCC1                        | 49 | 23 |
| 80 | 15{27} | 11{327} | 9{27,327} | CCc1nnnc1N1CCCC1c1ccsc1                            | 35 | 18 |
| 81 | 15{28} | 11{299} | 9{28,299} | COC1(CO)CCN(CC1)c1nnnn1CCc1ccc(F)cc1               | 0  | 0  |
| 82 | 15{28} | 11{300} | 9{28,300} | Fc1ccc(Cc1nnnc2N2CCCOCC2)cc1                       | 28 | 13 |
| 83 | 15{29} | 11{328} | 9{29,328} | Fc1ccc(Cn2nnnc2N2CCOCC2)cc1                        | 41 | 20 |
| 84 | 15{30} | 11{299} | 9{30,299} | COC1(CO)CCN(CC1)c1nnnn1Cc1ccc(C)cc1                | 26 | 14 |
| 85 | 15{30} | 11{300} | 9{30,300} | Cc1ccc(Cn2nnnc2N2CCCOCC2)cc1                       | 50 | 26 |
| 86 | 15{31} | 11{329} | 9{31,329} | COc1cccc(Cn2nnnc2N2CCOC(CC2)C(F)F)c1               | 13 | 7  |
| 87 | 15{31} | 11{330} | 9{31,330} | COc1cccc(Cn2nnnc2N(C)C2CCCN(C)C2=O)c               | 0  | 0  |
| 88 | 15{31} | 11{331} | 9{31,331} | COc1cccc(Cn2nnnc2N2C3CCC2CC2(CC2)C3)c              | 0  | 0  |
| 89 | 15{31} | 11{299} | 9{31,299} | COc1cccc(Cn2nnnc2N2CCC(CO)(CC2)OC)c1               | 39 | 18 |
| 90 | 15{31} | 11{332} | 9{31,332} | COc1cccc(Cn2nnnc2N2CCOC(C)(C2)C(F)F)c1             | 0  | 0  |
| 91 | 15{31} | 11{300} | 9{31,300} | COc1cccc(Cn2nnnc2N2CCCOCC2)c1                      | 54 | 28 |
| 92 | 15{32} | 11{287} | 9{32,287} | O=C(N1CCN(CC1)c1nnnn1Cc1cccs1)c1ccc1               | 0  | 0  |
| 93 | 15{32} | 11{333} | 9{32,333} | CC1(C)CN(CCS1)c1nnnn1Cc1cccs1                      | 23 | 12 |
| 94 | 15{33} | 11{334} | 9{33,334} | Cn1cnc1N1CCN(CC1)c1nnnn1Cc1ccccc1F                 | 0  | 0  |
| 95 | 15{33} | 11{335} | 9{33,335} | Fc1ccccc1Cn1nnnc1N1C[C@H]2[C@@H](C1)C              | 0  | 0  |
| 96 | 15{33} | 11{336} | 9{33,336} | (=O)NC2=O<br>CS(=O)(=O)C1CCN(CC1)c1nnnn1Cc1ccccc1F | 0  | 0  |

|     |        |         |           |                                                |    |    |
|-----|--------|---------|-----------|------------------------------------------------|----|----|
| 97  | 15{33} | 11{109} | 9{33,109} | Cn1nc2CCN(Cc2cc1=O)c1nnnn1Cc1cccc1F            | 0  | 0  |
| 98  | 15{33} | 11{321} | 9{33,321} | OCC1CCN(CC1)c1nnnn1Cc1cccc1F                   | 29 | 14 |
| 99  | 15{34} | 11{337} | 9{34,337} | CN(CC1CCOC1)c1nnnn1Cc1cccc(c1)C(F)(F)F         | 31 | 16 |
| 100 | 15{34} | 11{300} | 9{34,300} | FC(F)(F)c1cccc(Cn2nnnc2N2CCCOCC2)c1            | 66 | 35 |
| 101 | 15{35} | 11{328} | 9{35,328} | FC(F)(F)c1ccc(Cc2nnnc2N2CCCOCC2)cc1            | 39 | 20 |
| 102 | 15{36} | 11{338} | 9{36,338} | CCC1CN(CC(CC)O1)c1nnnn1CCNC(C)=O               | 42 | 22 |
| 103 | 15{36} | 11{339} | 9{36,339} | CN(Cc1cccc(F)c1)c1nnnn1CCNC(C)=O               | 44 | 20 |
| 104 | 15{37} | 11{340} | 9{37,340} | CN(C)C1(Cn2nnnc2N2CCCCC2)CCCC1                 | 0  | 0  |
| 105 | 15{38} | 11{341} | 9{38,341} | C(Cn1nnnc1N1CCCC1)Oc1cccc1                     | 0  | 0  |
| 106 | 15{38} | 11{342} | 9{38,342} | CC1CCCCN1c1nnnn1CCOc1cccc1                     | 20 | 10 |
| 107 | 15{38} | 11{343} | 9{38,343} | C(Cn1nnnc1N1CCN(Cc2cccc2)CC1)Oc1cccc1          | 0  | 0  |
| 108 | 15{38} | 11{343} | 9{38,343} | C(Cn1nnnc1N1CCN(Cc2cccc2)CC1)Oc1cccc1          | 17 | 9  |
| 109 | 15{38} | 11{341} | 9{38,341} | C(Cn1nnnc1N1CCCC1)Oc1cccc1                     | 36 | 16 |
| 110 | 15{39} | 11{158} | 9{39,158} | CC(C)(Cn1nnnc1N1CCC(CC1)C(F)F)N1CCOC<br>C1     | 13 | 5  |
| 111 | 15{39} | 11{344} | 9{39,344} | CC(C)(Cn1nnnc1N1CCN(C1)C(=O)C1CC1)N1C<br>COCC1 | 0  | 0  |
| 112 | 15{39} | 11{345} | 9{39,345} | CC(C)(Cn1nnnc1N1CCCCC1)N1CCOCC1                | 0  | 0  |
| 113 | 15{40} | 11{346} | 9{40,346} | CCN(C)c1nnnn1CC(C)(C)N1CCCCC1                  | 0  | 0  |
| 114 | 15{41} | 11{299} | 9{41,299} | COc1cccc1CCn1nnnc1N1CCC(CO)(CC1)OC             | 35 | 19 |
| 115 | 15{41} | 11{300} | 9{41,300} | COc1cccc1CCn1nnnc1N1CCCOCC1                    | 56 | 28 |
| 116 | 15{42} | 11{300} | 9{42,300} | C(Cn1nnnc1N1CCCOCC1)Cn1ccc2cccc12              | 7  | 3  |
| 117 | 15{42} | 11{337} | 9{42,337} | CN(CC1CCOC1)c1nnnn1CCc1ccc2cccc12              | 5  | 2  |

|     |        |         |           |                                           |    |    |
|-----|--------|---------|-----------|-------------------------------------------|----|----|
| 118 | 15{43} | 11{347} | 9{43,347} | NC(=O)c1ccc(Cn2nnnc2N2CCCCCCC2)cc1        | 32 | 17 |
| 119 | 15{43} | 11{106} | 9{43,106} | NC(=O)c1ccc(Cn2nnnc2N2CCc3ccccc3CC2)cc1   | 49 | 24 |
| 120 | 15{43} | 11{320} | 9{43,320} | COC(=O)C1CCN(CC1)c1nnnn1Cc1ccc(cc1)C(N)=O | 17 | 8  |
| 121 | 15{43} | 11{348} | 9{43,348} | CC(C)C1CN(CCCO1)c1nnnn1Cc1ccc(cc1)C(N)=O  | 0  | 0  |
| 122 | 15{43} | 11{338} | 9{43,338} | CCC1CN(CC(CC)O1)c1nnnn1Cc1ccc(cc1)C(N)=O  | 31 | 15 |
| 123 | 15{44} | 11{349} | 9{44,349} | O=C1CCCCCN1CCc1nnnc1N1CCCC(CC#C)C1        | 43 | 22 |
| 124 | 15{44} | 11{350} | 9{44,350} | CN(CCC=C)c1nnnn1CCCN1CCCCC1=O             | 53 | 24 |
| 125 | 15{44} | 11{351} | 9{44,351} | CCN1CCN(CC1=O)c1nnnn1CCCN1CCCCC1=O        | 36 | 18 |
| 126 | 15{45} | 11{297} | 9{45,297} | CC1(OCCO1)C1CCN(CC1)c1nnnn1CCc1cccs1      | 39 | 19 |
| 127 | 15{45} | 11{298} | 9{45,298} | CC1(OCCO1)C1CCCN(C1)c1nnnn1CCc1cccs1      | 23 | 12 |
| 128 | 15{46} | 11{297} | 9{46,297} | CC1(OCCO1)C1CCN(CC1)c1nnnn1CCc1ccco1      | 0  | 0  |
| 129 | 15{46} | 11{298} | 9{46,298} | CC1(OCCO1)C1CCCN(C1)c1nnnn1CCc1ccco1      | 26 | 13 |
| 130 | 15{47} | 11{343} | 9{47,343} | Cc1ccccc1Cn1nnnc1N1CCN(Cc2ccccc2)CC1      | 0  | 0  |
| 131 | 15{47} | 11{341} | 9{47,341} | Cc1ccccc1Cn1nnnc1N1CCCC1                  | 36 | 17 |
| 132 | 15{47} | 11{352} | 9{47,352} | Cc1ccccc1Cn1nnnc1N1CCC(Cn2ccnn2)CC1       | 0  | 0  |
| 133 | 15{47} | 11{341} | 9{47,341} | Cc1ccccc1Cn1nnnc1N1CCCC1                  | 0  | 0  |
| 134 | 15{47} | 11{343} | 9{47,343} | Cc1ccccc1Cn1nnnc1N1CCN(Cc2ccccc2)CC1      | 0  | 0  |
| 135 | 15{48} | 11{299} | 9{48,299} | COC1(CO)CCN(CC1)c1nnnn1CCc1ccccc1F        | 33 | 17 |
| 136 | 15{48} | 11{300} | 9{48,300} | Fc1ccccc1CCn1nnnc1N1CCCOCC1               | 49 | 24 |
| 137 | 15{48} | 11{353} | 9{48,353} | OCC1(O)CCN(CC1)c1nnnn1CCc1ccccc1F         | 27 | 13 |

|     |        |         |           |                                              |    |    |
|-----|--------|---------|-----------|----------------------------------------------|----|----|
| 138 | 15{49} | 11{354} | 9{49,354} | CC1N(CN(C)C1=O)c1nnnn1Cc1ccc(OC(F)F)cc1      | 0  | 0  |
| 139 | 15{50} | 11{298} | 9{50,298} | CCCNC(=O)Cn1nnnc1N1CCCC(C1)C1(C)OCC<br>O1    | 0  | 0  |
| 140 | 15{50} | 11{297} | 9{50,297} | CCCNC(=O)Cn1nnnc1N1CCC(CC1)C1(C)OCC<br>O1    | 0  | 0  |
| 141 | 15{51} | 11{355} | 9{51,355} | CN(Cc1enn(C)c1)c1nnnn1CCc1ccc2OCOc2c1        | 44 | 21 |
| 142 | 15{52} | 11{300} | 9{52,300} | COc1ccc(C)cc1CCn1nnnc1N1CCCOCC1              | 56 | 27 |
| 143 | 15{52} | 11{319} | 9{52,319} | COc1ccc(C)cc1CCn1nnnc1N(C)CC1COCCO1          | 67 | 35 |
| 144 | 15{53} | 11{300} | 9{53,300} | Fc1cccc(Cc2n2nnnc2N2CCCOCC2)c1               | 37 | 17 |
| 145 | 15{53} | 11{299} | 9{53,299} | COC1(CO)CCN(CC1)c1nnnn1CCc1cccc(F)c1         | 45 | 23 |
| 146 | 15{54} | 11{319} | 9{54,319} | CN(CC1COCCO1)c1nnnn1CCCOCC1CCCO1             | 38 | 19 |
| 147 | 15{55} | 11{300} | 9{55,300} | FC(F)(F)c1ccc(Cn2nnnc2N2CCCOCC2)cc1          | 64 | 31 |
| 148 | 15{55} | 11{337} | 9{55,337} | CN(CC1CCOC1)c1nnnn1Cc1ccc(cc1)C(F)(F)F       | 60 | 28 |
| 149 | 15{56} | 11{338} | 9{56,338} | CCC1CN(CC(CC)O1)c1nnnn1Cc1csc(C)n1           | 28 | 13 |
| 150 | 15{57} | 11{300} | 9{57,300} | Cc1cc(Cn2nnnc2N2CCCOCC2)ccc1F                | 65 | 32 |
| 151 | 15{57} | 11{261} | 9{57,261} | Cc1cc(Cn2nnnc2N2CCC(CC2)C2CCCO2)ccc1F        | 65 | 29 |
| 152 | 15{57} | 11{299} | 9{57,299} | COC1(CO)CCN(CC1)c1nnnn1Cc1ccc(F)c(C)c1       | 54 | 27 |
| 153 | 15{58} | 11{328} | 9{58,328} | FC(F)(F)Oc1ccc(Cn2nnnc2N2CCOCC2)cc1          | 39 | 19 |
| 154 | 15{58} | 11{300} | 9{58,300} | FC(F)(F)Oc1ccc(Cn2nnnc2N2CCCOCC2)cc1         | 24 | 12 |
| 155 | 15{59} | 11{300} | 9{59,300} | COc1ccc2cc(Cn3nnnc3N3CCCOCC3)ccc2c1          | 59 | 28 |
| 156 | 15{60} | 11{346} | 9{60,346} | CCN(C)c1nnnn1Cc1cnn(c1)-c1cccc1              | 0  | 0  |
| 157 | 15{60} | 11{354} | 9{60,354} | CC1N(CN(C)C1=O)c1nnnn1Cc1cnn(c1)-<br>c1cccc1 | 0  | 0  |

|     |        |         |           |                                        |    |    |
|-----|--------|---------|-----------|----------------------------------------|----|----|
| 158 | 15{61} | 11{322} | 9{61,322} | CN(C)S(=O)(=O)c1cccc1Cn1nnnc1N(C)C1CC1 | 37 | 18 |
| 159 | 15{61} | 11{346} | 9{61,346} | CCN(C)c1nnnn1Cc1cccc1S(=O)(=O)N(C)C    | 40 | 19 |
| 160 | 15{62} | 11{322} | 9{62,322} | CN(C1CC1)c1nnnn1C1CCN(CC1)C(=O)c1ccco  | 40 | 20 |
| 161 | 15{62} | 11{356} | 9{62,356} | CN(CC1CCC1)c1nnnn1C1CCN(CC1)C(=O)c1cc  | 38 | 20 |
| 162 | 15{63} | 11{318} | 9{63,318} | C(C1CC1)n1nnnc1N1CCn2c(C1)nnc2-c1cccc1 | 0  | 0  |
| 163 | 15{63} | 11{357} | 9{63,357} | COc1cccc1N1CCN(CC1)c1nnnn1CC1CC1       | 40 | 19 |
| 164 | 15{63} | 11{311} | 9{63,311} | CC(C)(C)OC(=O)N[C@H]1CCCN(C1)c1nnnn1   | 0  | 0  |
| 165 | 15{63} | 11{307} | 9{63,307} | CN(CC1CCN(C1)c1nnnn1CC1CC1)C(=O)OC(C   | 4  | 2  |
| 166 | 15{63} | 11{309} | 9{63,309} | O=c1[nH]c2cccc2n1C1CCN(CC1)c1nnnn1CC1  | 0  | 0  |
| 167 | 15{63} | 11{358} | 9{63,358} | CC(C)(C)OC(=O)NCC1CCN(C1)c1nnnn1CC1C   | 39 | 14 |
| 168 | 15{63} | 11{313} | 9{63,313} | CC(C)(C)OC(=O)N1C[C@H]2CN(C[C@H]2C1)   | 22 | 9  |
| 169 | 15{63} | 11{314} | 9{63,314} | CC(C)(C)OC(=O)N1CCCN(CC1)c1nnnn1CC1C   | 43 | 17 |
| 170 | 15{63} | 11{310} | 9{63,310} | CC1CN(CCC1NC(=O)OC(C)(C)C)c1nnnn1CC1   | 32 | 13 |
| 171 | 15{63} | 11{315} | 9{63,315} | CC(C)(C)OC(=O)N1C[C@@H]2C[C@H]1CN2c    | 0  | 0  |
| 172 | 15{63} | 11{312} | 9{63,312} | CC(C)(C)OC(=O)NC1CCCN(C1)c1nnnn1CC1C   | 0  | 0  |
| 173 | 15{63} | 11{359} | 9{63,359} | O=c1cccc2[C@@H]3C[C@@H](CN(C3)c3nnnn   | 0  | 0  |
| 174 | 15{63} | 11{360} | 9{63,360} | CC(C)(C)OC(=O)NC1CCN(CC1)c1nnnn1CC1C   | 22 | 9  |
| 175 | 15{63} | 11{361} | 9{63,361} | CC(C)(C)OC(=O)N1CCN(CC1)c1nnnn1CC1CC   | 0  | 0  |

|     |        |         |           |                                                 |     |    |
|-----|--------|---------|-----------|-------------------------------------------------|-----|----|
| 176 | 15{63} | 11{327} | 9{63,327} | C(C1CC1)n1nnnc1N1CCCC1c1ccsc1                   | 106 | 50 |
| 177 | 15{63} | 11{306} | 9{63,306} | CC(C)(C)OC(=O)NCC1CCCN(C1)c1nnnn1CC1<br>CC1     | 37  | 16 |
| 178 | 15{63} | 11{308} | 9{63,308} | CC(C)(C)OC(=O)NCC1CCN(CC1)c1nnnn1CC1<br>CC1     | 21  | 8  |
| 179 | 15{64} | 11{322} | 9{64,322} | CN(C)C(=O)c1ccc(Cn2nnnc2N(C)C2CC2)cc1           | 26  | 12 |
| 180 | 15{64} | 11{356} | 9{64,356} | CN(C)C(=O)c1ccc(Cn2nnnc2N(C)CC2CCC2)cc<br>1     | 32  | 16 |
| 181 | 15{65} | 11{355} | 9{65,355} | CN(Cc1enn(C)c1)c1nnnn1C1CCC(CC1)C(F)(F)<br>F    | 17  | 9  |
| 182 | 15{66} | 11{338} | 9{66,338} | CCC1CN(CC(CC)O1)c1nnnn1CCC1CCCO1                | 62  | 31 |
| 183 | 15{67} | 11{300} | 9{67,300} | Clc1ccc(Cn2nnnc2N2CCCOCC2)cn1                   | 11  | 6  |
| 184 | 15{67} | 11{338} | 9{67,338} | CCC1CN(CC(CC)O1)c1nnnn1Cc1ccc(Cl)nc1            | 26  | 13 |
| 185 | 15{68} | 11{322} | 9{68,322} | COc1ccc(OC)c(Cn2nnnc2N(C)C2CC2)c1               | 43  | 20 |
| 186 | 15{68} | 11{300} | 9{68,300} | COc1ccc(OC)c(Cn2nnnc2N2CCCOCC2)c1               | 72  | 34 |
| 187 | 15{69} | 11{65}  | 9{69,65}  | FC1=CCCN(C1)c1nnnn1CCNC(=O)c1cccs1              | 0   | 0  |
| 188 | 15{70} | 11{362} | 9{70,362} | Cc1ccc(cc1F)C(=O)NCCn1nnnc1N1CCC[C@@<br>H](O)C1 | 0   | 0  |
| 189 | 15{71} | 11{297} | 9{71,297} | CC1(OCCO1)C1CCN(CC1)c1nnnn1Cc1ccc(F)c<br>1      | 0   | 0  |
| 190 | 15{71} | 11{298} | 9{71,298} | CC1(OCCO1)C1CCCN(C1)c1nnnn1Cc1ccc(F)c<br>1      | 25  | 13 |
| 191 | 15{72} | 11{318} | 9{72,318} | C1CC(C1)n1nnnc1N1CCn2c(C1)nnc2-c1cccc1          | 0   | 0  |
| 192 | 15{73} | 11{322} | 9{73,322} | COc1ccc(Cn2nnnc2N(C)C2CC2)c(OC)c1               | 0   | 0  |
| 193 | 15{73} | 11{300} | 9{73,300} | COc1ccc(Cn2nnnc2N2CCCOCC2)c(OC)c1               | 0   | 0  |
| 194 | 15{74} | 11{299} | 9{74,299} | CCOc1cccc1Cn1nnnc1N1CCC(CO)(CC1)OC              | 41  | 19 |
| 195 | 15{74} | 11{300} | 9{74,300} | CCOc1cccc1Cn1nnnc1N1CCCOCC1                     | 44  | 21 |

|     |        |         |           |                                                 |    |    |
|-----|--------|---------|-----------|-------------------------------------------------|----|----|
| 196 | 15{75} | 11{320} | 9{75,320} | COC(=O)C1CCN(CC1)c1nnnn1CCc1cccc1Cl             | 54 | 26 |
| 197 | 15{75} | 11{335} | 9{75,335} | Clc1cccc1CCn1nnnc1N1C[C@H]2[C@@H](C1)C(=O)NC2=O | 0  | 0  |
| 198 | 15{75} | 11{300} | 9{75,300} | Clc1cccc1CCn1nnnc1N1CCCOCC1                     | 42 | 22 |
| 199 | 15{76} | 11{337} | 9{76,337} | CN(CC1CCOC1)c1nnnn1Cc1cccc1C(F)(F)F             | 42 | 22 |
| 200 | 15{77} | 11{363} | 9{77,363} | COCC1(C)CN(CCO1)c1nnnn1Cc1ccc(F)c(F)c1          | 72 | 33 |
| 201 | 15{77} | 11{364} | 9{77,364} | CN(CC1(C)COC1)c1nnnn1Cc1ccc(F)c(F)c1            | 0  | 0  |
| 202 | 15{77} | 11{299} | 9{77,299} | COC1(CO)CCN(CC1)c1nnnn1Cc1ccc(F)c(F)c1          | 50 | 24 |
| 203 | 15{78} | 11{298} | 9{78,298} | Cc1ccc(Cn2nnnc2N2CCCC(C2)C2(C)OCCO2)o           | 31 | 16 |
| 204 | 15{78} | 11{297} | 9{78,297} | Cc1ccc(Cn2nnnc2N2CCC(CC2)C2(C)OCCO2)o           | 23 | 12 |
| 205 | 15{79} | 11{365} | 9{79,365} | CC1CC(CN1c1nnnn1OC1CCCCO1)c1ccc(C)cc1           | 0  | 0  |
| 206 | 15{79} | 11{327} | 9{79,327} | C1CC(N(C1)c1nnnn1OC1CCCCO1)c1ccsc1              | 0  | 0  |
| 207 | 15{80} | 11{328} | 9{80,328} | Fc1ccc(Cn2nnnc2N2CCOCC2)c(c1)C(F)(F)F           | 18 | 9  |
| 208 | 15{81} | 11{298} | 9{81,298} | Cc1ccsc1Cn1nnnc1N1CCCC(C1)C1(C)OCCO1            | 23 | 12 |
| 209 | 15{81} | 11{366} | 9{81,366} | CN(CC(C)(C)O)c1nnnn1Cc1sccc1C                   | 0  | 0  |
| 210 | 15{81} | 11{297} | 9{81,297} | Cc1ccsc1Cn1nnnc1N1CCC(CC1)C1(C)OCCO1            | 38 | 19 |
| 211 | 15{81} | 11{367} | 9{81,367} | CN(CC(=O)N1CCOCC1)c1nnnn1Cc1sccc1C              | 0  | 0  |
| 212 | 15{81} | 11{368} | 9{81,368} | Cc1ccsc1Cn1nnnc1N1CCCC(C1)S(C)(=O)=O            | 0  | 0  |
| 213 | 15{82} | 11{369} | 9{82,369} | CC1CN(CCO1)c1nnnn1Cc1cccc1Br                    | 33 | 16 |
| 214 | 15{83} | 11{298} | 9{83,298} | CCOCCn1nnnc1N1CCCC(C1)C1(C)OCCO1                | 41 | 22 |
| 215 | 15{83} | 11{297} | 9{83,297} | CCOCCn1nnnc1N1CCC(CC1)C1(C)OCCO1                | 28 | 14 |

|     |        |         |           |                                                           |    |    |
|-----|--------|---------|-----------|-----------------------------------------------------------|----|----|
| 216 | 15{84} | 11{319} | 9{84,319} | CC(C)Oc1cccc(Cn2nnnc2N(C)CC2COCCO2)c1                     | 70 | 31 |
| 217 | 15{85} | 11{319} | 9{85,319} | CC(C)Oc1cccc1Cn1nnnc1N(C)CC1COCCO1                        | 56 | 26 |
| 218 | 15{86} | 11{337} | 9{86,337} | CN(CC1CCOC1)c1nnnn1CCOc1cccc1Cl                           | 0  | 0  |
| 219 | 15{87} | 11{321} | 9{87,321} | OCC1CCN(CC1)c1nnnn1Cc1ccc(Cl)c(Cl)c1                      | 44 | 22 |
| 220 | 15{88} | 11{319} | 9{88,319} | CN(CC1COCCO1)c1nnnn1Cc1ccc(F)c(Cl)c1                      | 41 | 21 |
| 221 | 15{89} | 11{110} | 9{89,110} | CN(CC1(O)CCOCC1)c1nnnn1Cc1ccc(F)cc1F                      | 0  | 0  |
| 222 | 15{89} | 11{370} | 9{89,370} | CN(CC1CCCOC1)c1nnnn1Cc1ccc(F)cc1F                         | 35 | 25 |
| 223 | 15{89} | 11{299} | 9{89,299} | COC1(CO)CCN(CC1)c1nnnn1Cc1ccc(F)cc1F                      | 33 | 15 |
| 224 | 15{90} | 11{371} | 9{90,371} | CC(C)OCCn1nnnc1N1CCOC2(Cc3ccccc23)C1                      | 73 | 33 |
| 225 | 15{91} | 11{372} | 9{91,372} | C[1C@@H]1C[1C@H](O)CN(C1)c1nnnn1CCc1<br>c[nH]c2ccc(F)cc12 | 0  | 0  |
| 226 | 15{92} | 11{322} | 9{92,322} | COc1cccc(Cn2nnnc2N(C)C2CC2)c1OC                           | 43 | 22 |
| 227 | 15{93} | 11{344} | 9{93,344} | Cc1ccc(Cn2nnnc2N2CCN(C2)C(=O)C2CC2)s1                     | 0  | 0  |
| 228 | 15{93} | 11{367} | 9{93,367} | CN(CC(=O)N1CCOCC1)c1nnnn1Cc1ccc(C)s1                      | 0  | 0  |
| 229 | 15{93} | 11{297} | 9{93,297} | Cc1ccc(Cn2nnnc2N2CCC(CC2)C2(C)OCCO2)s<br>1                | 39 | 19 |
| 230 | 15{93} | 11{373} | 9{93,373} | CC(C)NC(=O)[C@H]1CCCN(C1)c1nnnn1Cc1cc<br>c(C)s1           | 0  | 0  |
| 231 | 15{93} | 11{298} | 9{93,298} | Cc1ccc(Cn2nnnc2N2CCCC(C2)C2(C)OCCO2)s<br>1                | 0  | 0  |
| 232 | 15{93} | 11{374} | 9{93,374} | Cc1noc(n1)C1CCN(C1)c1nnnn1Cc1ccc(C)s1                     | 0  | 0  |
| 233 | 15{94} | 11{299} | 9{94,299} | COC1(CO)CCN(CC1)c1nnnn1Cc1cccc(C)c1                       | 34 | 18 |
| 234 | 15{94} | 11{375} | 9{94,375} | Cc1cccc(Cn2nnnc2N2CCN(CC2)c2nccn2)c1                      | 48 | 24 |
| 235 | 15{95} | 11{299} | 9{95,299} | COC1(CO)CCN(CC1)c1nnnn1Cc1cc(F)ccc1F                      | 17 | 9  |



|     |         |         |            |                                               |    |    |
|-----|---------|---------|------------|-----------------------------------------------|----|----|
| 236 | 15{96}  | 11{299} | 9{96,299}  | COc1cccc(CCN2nnc2N2CCC(CO)(CC2)OC)c1          | 42 | 21 |
| 237 | 15{97}  | 11{356} | 9{97,356}  | CCNC(=O)c1ccc(Cn2nnc2N(C)CC2CCC2)cc1          | 0  | 0  |
| 238 | 15{98}  | 11{349} | 9{98,349}  | C#CCC1CCCN(C1)c1nnnn1C1CCN(CC1)C1CC<br>CC1    | 0  | 0  |
| 239 | 15{98}  | 11{350} | 9{98,350}  | CN(CCC=C)c1nnnn1C1CCN(CC1)C1CCCC1             | 0  | 0  |
| 240 | 15{99}  | 11{299} | 9{99,299}  | CCOc1ccc(Cn2nnc2N2CCC(CO)(CC2)OC)cc1          | 58 | 24 |
| 241 | 15{100} | 11{299} | 9{100,299} | COC1(CO)CCN(CC1)c1nnnn1Cc1ccc(C)cc1C          | 31 | 16 |
| 242 | 15{100} | 11{376} | 9{100,376} | COCC(=O)N1CCN(CC1)c1nnnn1Cc1ccc(C)cc1<br>C    | 11 | 6  |
| 243 | 15{101} | 11{299} | 9{101,299} | COC1(CO)CCN(CC1)c1nnnn1Cc1c(C)cc(C)cc1<br>C   | 14 | 7  |
| 244 | 15{102} | 11{377} | 9{102,377} | Fc1cccc2OCCN(Cc12)c1nnnn1Cc1ccsc1             | 0  | 0  |
| 245 | 15{102} | 11{378} | 9{102,378} | Cc1ccc(C)n1C1CCN(CC1)c1nnnn1Cc1ccsc1          | 0  | 0  |
| 246 | 15{102} | 11{255} | 9{102,255} | CC1CN(CCS(=O)(=O)C1)c1nnnn1Cc1ccsc1           | 0  | 0  |
| 247 | 15{102} | 11{379} | 9{102,379} | OC1(CCCN(CC1)c1nnnn1Cc1ccsc1)C(F)(F)F         | 0  | 0  |
| 248 | 15{102} | 11{184} | 9{102,184} | COC1(CCCN(C1)c1nnnn1Cc1ccsc1)C(F)(F)F         | 0  | 0  |
| 249 | 15{102} | 11{380} | 9{102,380} | CNS(=O)(=O)N1CCN(CC1)c1nnnn1Cc1ccsc1          | 0  | 0  |
| 250 | 15{102} | 11{381} | 9{102,381} | COc1ccc2OCCN(Cc2c1)c1nnnn1Cc1ccsc1            | 0  | 0  |
| 251 | 15{102} | 11{382} | 9{102,382} | C(c1ccsc1)n1nnc1N1CCCC(C1)NC1CCOCC1           | 0  | 0  |
| 252 | 15{102} | 11{287} | 9{102,287} | O=C(N1CCN(CC1)c1nnnn1Cc1ccsc1)c1ccc1          | 65 | 23 |
| 253 | 15{102} | 11{383} | 9{102,383} | C[C@@H]1CN(CCN1S(C)(=O)=O)c1nnnn1Cc1<br>ccsc1 | 11 | 5  |
| 254 | 15{102} | 11{384} | 9{102,384} | O=C1CCCCN1C1CCCN(C1)c1nnnn1Cc1ccsc1           | 0  | 0  |
| 255 | 15{102} | 11{385} | 9{102,385} | CN(Cc1nc(C)no1)c1nnnn1Cc1ccsc1                | 0  | 0  |

|     |         |         |            |                                                           |    |    |
|-----|---------|---------|------------|-----------------------------------------------------------|----|----|
| 256 | 15{102} | 11{356} | 9{102,356} | CN(CC1CCC1)c1nnnn1Cc1ccsc1                                | 58 | 28 |
| 257 | 15{103} | 11{293} | 9{103,293} | C(C1CCOC1)n1nnnc1N1[C@H]2CC[C@@H]1<br>C[C@@H](C2)c1ccccc1 | 0  | 0  |
| 258 | 15{103} | 11{386} | 9{103,386} | CN(Cc1ccc(F)cc1)c1nnnn1CC1CCOC1                           | 80 | 37 |
| 259 | 15{103} | 11{387} | 9{103,387} | C(C1CCOC1)n1nnnc1N1CCC(Cc2ccccc2)CC1                      | 0  | 0  |
| 260 | 15{103} | 11{388} | 9{103,388} | CN(Cc1ccc(Cl)s1)c1nnnn1CC1CCOC1                           | 0  | 0  |
| 261 | 15{103} | 11{317} | 9{103,317} | CN(Cc1ccc(C)o1)c1nnnn1CC1CCOC1                            | 0  | 0  |
| 262 | 15{103} | 11{389} | 9{103,389} | CN(Cc1cccs1)c1nnnn1CC1CCOC1                               | 22 | 11 |
| 263 | 15{103} | 11{390} | 9{103,390} | CS(=O)(=O)N1CCN(CC1)c1nnnn1CC1CCOC1                       | 7  | 3  |
| 264 | 15{104} | 11{391} | 9{104,391} | CN(CC1CC1)c1nnnn1Cc1ccc(CN2CCCC2=O)cc<br>1                | 41 | 22 |
| 265 | 15{104} | 11{322} | 9{104,322} | CN(C1CC1)c1nnnn1Cc1ccc(CN2CCCC2=O)cc1                     | 53 | 25 |
| 266 | 15{105} | 11{322} | 9{105,322} | CN(C1CC1)c1nnnn1Cc1ccccc1CN1CCCC1=O                       | 19 | 10 |
| 267 | 15{105} | 11{391} | 9{105,391} | CN(CC1CC1)c1nnnn1Cc1ccccc1CN1CCCC1=O                      | 41 | 21 |
| 268 | 15{106} | 11{392} | 9{106,392} | COCc1ccc(Cn2nnnc2N2CC(C)OC3(CCC3)C2)c<br>c1               | 48 | 23 |
| 269 | 15{106} | 11{61}  | 9{106,61}  | COCc1ccc(Cn2nnnc2N2CCC3(C2)CCOCC3)cc1                     | 23 | 12 |
| 270 | 15{106} | 11{393} | 9{106,393} | COCc1ccc(Cn2nnnc2N2CCOCC3(CCC3)C2)cc1                     | 37 | 18 |
| 271 | 15{106} | 11{394} | 9{106,394} | COCc1ccc(Cn2nnnc2N2CCOC3(CCCC3)C2)cc1                     | 37 | 18 |
| 272 | 15{106} | 11{395} | 9{106,395} | COCc1ccc(Cn2nnnc2N2CCOC3(CCOC3)C2)cc1                     | 20 | 9  |
| 273 | 15{107} | 11{299} | 9{107,299} | COCc1cccc(Cn2nnnc2N2CCC(CO)(CC2)OC)c1                     | 14 | 6  |
| 274 | 15{108} | 11{338} | 9{108,338} | CCC1CN(CC(CC)O1)c1nnnn1Cc1cccc(c1)C(N)<br>=O              | 32 | 17 |
| 275 | 15{108} | 11{320} | 9{108,320} | COC(=O)C1CCN(CC1)c1nnnn1Cc1cccc(c1)C(N)<br>)=O            | 27 | 13 |

|     |         |         |            |                                         |    |    |
|-----|---------|---------|------------|-----------------------------------------|----|----|
| 276 | 15{109} | 11{322} | 9{109,322} | CN(C)C(=O)c1cccc(Cn2nnnc2N(C)C2CC2)c1   | 26 | 13 |
| 277 | 15{109} | 11{356} | 9{109,356} | CN(C)C(=O)c1cccc(Cn2nnnc2N(C)CC2CCC2)c  | 44 | 21 |
| 278 | 15{110} | 11{333} | 9{110,333} | CNC(=O)c1cccc(Cn2nnnc2N2CCSC(C)(C)C2)c1 | 87 | 42 |
| 279 | 15{111} | 11{328} | 9{111,328} | Clc1cc(Cn2nnnc2N2CCOCC2)cc2OCCOc12      | 57 | 29 |
| 280 | 15{111} | 11{396} | 9{111,396} | COCCN(C)c1nnnn1Cc1cc(Cl)c2OCCOc2c1      | 55 | 27 |
| 281 | 15{112} | 11{321} | 9{112,321} | OCC1CCN(CC1)c1nnnn1Cc1c(Cl)cccc1Cl      | 42 | 20 |
| 282 | 15{113} | 11{319} | 9{113,319} | CN(CC1COCCO1)c1nnnn1CCc1c(F)cccc1F      | 0  | 0  |
| 283 | 15{114} | 11{297} | 9{114,297} | Cc1ccc(CCn2nnnc2N2CCC(CC2)C2(C)OCCO2)   | 20 | 10 |
| 284 | 15{114} | 11{298} | 9{114,298} | Cc1ccc(CCn2nnnc2N2CCCC(C2)C2(C)OCCO2)   | 29 | 13 |
| 285 | 15{115} | 11{302} | 9{115,302} | CN(CCOc1ccc(F)cc1)c1nnnn1CCN1CCNC1=O    | 40 | 19 |
| 286 | 15{115} | 11{327} | 9{115,327} | O=C1NCCN1CCn1nnnc1N1CCCC1c1ccsc1        | 27 | 13 |
| 287 | 15{115} | 11{349} | 9{115,349} | O=C1NCCN1CCn1nnnc1N1CCCC(CC#C)C1        | 25 | 11 |
| 288 | 15{116} | 11{322} | 9{116,322} | CCCC(=O)Nc1ccc(Cn2nnnc2N(C)C2CC2)cc1    | 32 | 17 |
| 289 | 15{117} | 11{340} | 9{117,340} | C(c1ccoc1)n1nnnc1N1CCCCC1               | 33 | 16 |
| 290 | 15{117} | 11{397} | 9{117,397} | CSC1CCCCN(C1)c1nnnn1Cc1ccoc1            | 48 | 21 |
| 291 | 15{118} | 11{288} | 9{118,288} | CC(=O)N1CCCN(CC1)c1nnnn1CCCC1CCCC1      | 52 | 24 |
| 292 | 15{119} | 11{322} | 9{119,322} | CN(C1CC1)c1nnnn1Cc1cccc(c1)N1CCCC1=O    | 48 | 24 |
| 293 | 15{120} | 11{344} | 9{120,344} | Cc1cc(Cn2nnnc2N2CCN(C2)C(=O)C2CC2)no1   | 0  | 0  |
| 294 | 15{120} | 11{298} | 9{120,298} | Cc1cc(Cn2nnnc2N2CCCC(C2)C2(C)OCCO2)no   | 0  | 0  |
| 295 | 15{120} | 11{297} | 9{120,297} | Cc1cc(Cn2nnnc2N2CCC(CC2)C2(C)OCCO2)no   | 22 | 11 |

|     |         |         |            |                                                  |    |    |
|-----|---------|---------|------------|--------------------------------------------------|----|----|
| 296 | 15{121} | 11{398} | 9{121,398} | CC1CN(CC(C)O1)c1nnnn1CC1CCOCC1                   | 29 | 14 |
| 297 | 15{121} | 11{302} | 9{121,302} | CN(CCOc1ccc(F)cc1)c1nnnn1CC1CCOCC1               | 71 | 29 |
| 298 | 15{121} | 11{114} | 9{121,114} | CS(=O)(=O)C1CCCN(CC1)c1nnnn1CC1CCOC<br>C1        | 22 | 10 |
| 299 | 15{121} | 11{349} | 9{121,349} | C#CCC1CCCN(C1)c1nnnn1CC1CCOCC1                   | 45 | 22 |
| 300 | 15{121} | 11{399} | 9{121,399} | COCC1(C)CCN(C1)c1nnnn1CC1CCOCC1                  | 28 | 24 |
| 301 | 15{122} | 11{385} | 9{122,385} | CN(Cc1nc(C)no1)c1nnnn1Cc1csc2ccccc12             | 0  | 0  |
| 302 | 15{123} | 11{400} | 9{123,400} | CN(C1CCS(=O)(=O)C1)c1nnnn1Cc1c(C)nn(C)c<br>1C    | 0  | 0  |
| 303 | 15{124} | 11{322} | 9{124,322} | CN(C1CC1)c1nnnn1Cc1ccc(cc1)-n1cccn1              | 41 | 20 |
| 304 | 15{125} | 11{319} | 9{125,319} | CC(Cn1nnnc1N(C)CC1COCCO1)Oc1ccc(C)cc1            | 40 | 20 |
| 305 | 15{126} | 11{401} | 9{126,401} | NC(=O)C1CCN(CC1)c1nnnn1CC12CC3CC(CC(<br>C3)C1)C2 | 0  | 0  |
| 306 | 15{127} | 11{290} | 9{127,290} | CC1CN(CCN1C(=O)OC(C)(C)C)c1nnnn1CC#C             | 0  | 0  |
| 307 | 15{127} | 11{295} | 9{127,295} | O=C(OCc1ccccc1)N1CCN(CC1)c1nnnn1CC#C             | 0  | 0  |
| 308 | 15{127} | 11{292} | 9{127,292} | C[C@H]1CN(CCN1C(=O)OC(C)(C)C)c1nnnn1<br>CC#C     | 0  | 0  |
| 309 | 15{127} | 11{296} | 9{127,296} | C[C@@H]1CN(CCN1C(=O)OC(C)(C)C)c1nnnn<br>1CC#C    | 0  | 0  |
| 310 | 15{127} | 11{289} | 9{127,289} | C#CCn1nnnc1N1CCC(CC1)c1nc2ccccc2s1               | 0  | 0  |
| 311 | 15{128} | 11{322} | 9{128,322} | CN(C1CC1)c1nnnn1Cc1ccc(Cn2cccn2)cc1              | 41 | 21 |
| 312 | 15{129} | 11{288} | 9{129,288} | CC(=O)N1CCCN(CC1)c1nnnn1C1Cc2ccccc2C1            | 29 | 14 |
| 313 | 15{130} | 11{302} | 9{130,302} | CN(CCOc1ccc(F)cc1)c1nnnn1C1CCOCC1                | 0  | 0  |
| 314 | 15{130} | 11{327} | 9{130,327} | C1CC(N(C1)c1nnnn1C1CCOCC1)c1ccsc1                | 30 | 14 |
| 315 | 15{130} | 11{365} | 9{130,365} | CC1CC(CN1c1nnnn1C1CCOCC1)c1ccc(C)cc1             | 27 | 13 |

|     |         |         |            |                                                     |    |    |
|-----|---------|---------|------------|-----------------------------------------------------|----|----|
| 316 | 15{131} | 11{401} | 9{131,401} | NC(=O)C1CCN(CC1)c1nnnn1CC1CCCc2ccccc1               | 0  | 0  |
| 317 | 15{132} | 11{321} | 9{132,321} | OCC1CCN(CC1)c1nnnn1Cc1ccc(o1)-c1ccccc1              | 0  | 0  |
| 318 | 15{133} | 11{402} | 9{133,402} | CC1CN(CC2(CCCCC2)O1)c1nnnn1Cc1ccnn1C                | 8  | 4  |
| 319 | 15{133} | 11{403} | 9{133,403} | Cn1nccc1Cn1nnnc1N1CCC2(C)C(C1)C2(Cl)Cl              | 5  | 3  |
| 320 | 15{133} | 11{404} | 9{133,404} | COC(=O)[1C@]12CN(C[1C@H]1CCCC2)c1nnn<br>n1Cc1ccnn1C | 45 | 24 |
| 321 | 15{133} | 11{405} | 9{133,405} | Cn1nccc1Cn1nnnc1N1CCCC2(CCCCC2)C1                   | 30 | 14 |
| 322 | 15{133} | 11{406} | 9{133,406} | CC1CCN(CC11CCC1)c1nnnn1Cc1ccnn1C                    | 36 | 17 |
| 323 | 15{133} | 11{407} | 9{133,407} | Cn1nccc1Cn1nnnc1N1CCC2(C1)CCCC2                     | 50 | 23 |
| 324 | 15{133} | 11{408} | 9{133,408} | Cn1nccc1Cn1nnnc1N1CCCC2(CCCC2)C1                    | 36 | 17 |
| 325 | 15{133} | 11{409} | 9{133,409} | Cn1nccc1Cn1nnnc1N1CCSC2(CCCCC2)C1                   | 11 | 6  |
| 326 | 15{133} | 11{410} | 9{133,410} | Cn1nccc1Cn1nnnc1N1CCC2(CCCCC2)CC1                   | 11 | 6  |
| 327 | 15{133} | 11{411} | 9{133,411} | CCC1CCCN(C1)c1nnnn1Cc1ccnn1C                        | 39 | 19 |
| 328 | 15{133} | 11{412} | 9{133,412} | CON(CC1CC2CCC1C2)c1nnnn1Cc1ccnn1C                   | 0  | 0  |
| 329 | 15{133} | 11{413} | 9{133,413} | CC1CN(CC2(CCCC2)O1)c1nnnn1Cc1ccnn1C                 | 17 | 9  |
| 330 | 15{134} | 11{414} | 9{134,414} | CN(Cc1nccs1)c1nnnn1C1CCCC(O)C1                      | 2  | 1  |
| 331 | 15{135} | 11{322} | 9{135,322} | CN(C1CC1)c1nnnn1Cc1cnn(Cc2ccccc2)c1                 | 9  | 4  |
| 332 | 15{136} | 11{284} | 9{136,284} | Cc1n[nH]cc1Cn1nnnc1N1CCOC(C)(C)C1                   | 0  | 0  |
| 333 | 15{137} | 11{391} | 9{137,391} | CC(C)NC(=O)Nc1ccc(Cn2nnnc2N(C)CC2CC2)c<br>c1        | 0  | 0  |
| 334 | 15{137} | 11{322} | 9{137,322} | CC(C)NC(=O)Nc1ccc(Cn2nnnc2N(C)C2CC2)cc<br>1         | 0  | 0  |
| 335 | 15{138} | 11{321} | 9{138,321} | OCC1CCN(CC1)c1nnnn1Cc1cc(Br)cs1                     | 34 | 16 |

|     |         |         |            |                                               |    |    |
|-----|---------|---------|------------|-----------------------------------------------|----|----|
| 336 | 15{139} | 11{415} | 9{139,415} | CC1CC1n1nnnc1N(C)C[C@H]1CCCO1                 | 11 | 5  |
| 337 | 15{139} | 11{318} | 9{139,318} | CC1CC1n1nnnc1N1CCn2c(C1)nn2-c1cccc1           | 23 | 12 |
| 338 | 15{140} | 11{338} | 9{140,338} | CCC1CN(CC(CC)O1)c1nnnn1CC(C)Cn1cccn1          | 50 | 24 |
| 339 | 15{141} | 11{349} | 9{141,349} | O=C(CCCn1nnnc1N1CCCC(CC#C)C1)NC1CC1           | 12 | 6  |
| 340 | 15{142} | 11{322} | 9{142,322} | CN(C1CC1)c1nnnn1Cc1ccc(CS(C)(=O)=O)cc1        | 30 | 15 |
| 341 | 15{142} | 11{356} | 9{142,356} | CN(CC1CCC1)c1nnnn1Cc1ccc(CS(C)(=O)=O)c<br>c1  | 47 | 23 |
| 342 | 15{143} | 11{338} | 9{143,338} | CCC1CN(CC(CC)O1)c1nnnn1Cc1ccc(cc1)C(C)<br>O   | 30 | 15 |
| 343 | 15{144} | 11{298} | 9{144,298} | CC1(OCCO1)C1CCCN(C1)c1nnnn1CCn1cccn1          | 10 | 5  |
| 344 | 15{144} | 11{297} | 9{144,297} | CC1(OCCO1)C1CCN(CC1)c1nnnn1CCn1cccn1          | 31 | 14 |
| 345 | 15{145} | 11{322} | 9{145,322} | CN(C1CC1)c1nnnn1CC1CCCO1c1cccc1               | 27 | 13 |
| 346 | 15{146} | 11{322} | 9{146,322} | CN(C1CC1)c1nnnn1CCNC(=O)c1ccc(C)c1            | 66 | 31 |
| 347 | 15{147} | 11{416} | 9{147,416} | CS(=O)(=O)CCn1nnnc1N1CCCc2cccc2CC1            | 0  | 0  |
| 348 | 15{147} | 11{417} | 9{147,417} | COc1cccc2CCN(Cc12)c1nnnn1CCS(C)(=O)=O         | 0  | 0  |
| 349 | 15{147} | 11{405} | 9{147,405} | CS(=O)(=O)CCn1nnnc1N1CCCC2(CCCC2)C1           | 0  | 0  |
| 350 | 15{147} | 11{418} | 9{147,418} | CS(=O)(=O)CCn1nnnc1N1Cc2cccc2C(F)(F)C1        | 0  | 0  |
| 351 | 15{147} | 11{419} | 9{147,419} | CS(=O)(=O)CCn1nnnc1N1C2CCC1CC1(CC1(F)<br>F)C2 | 0  | 0  |
| 352 | 15{147} | 11{420} | 9{147,420} | CS(=O)(=O)CCn1nnnc1N1CCOC(C1)c1cccc1          | 0  | 0  |
| 353 | 15{147} | 11{421} | 9{147,421} | CS(=O)(=O)CCn1nnnc1N1CCC2(C1)OCc1cccc<br>21   | 24 | 14 |
| 354 | 15{147} | 11{387} | 9{147,387} | CS(=O)(=O)CCn1nnnc1N1CCC(Cc2cccc2)CC1         | 35 | 18 |
| 355 | 15{148} | 11{349} | 9{148,349} | C#CCC1CCCN(C1)c1nnnn1CC1CCCCO1                | 45 | 22 |

|     |         |         |            |                                                |    |    |
|-----|---------|---------|------------|------------------------------------------------|----|----|
| 356 | 15{149} | 11{304} | 9{149,304} | CC(C)C(=O)NCC1CCCN(C1)c1nnnn1CC1CCC<br>=CC1    | 26 | 14 |
| 357 | 15{150} | 11{299} | 9{150,299} | COC1(CO)CCN(CC1)c1nnnn1CCc1cccc(C)c1           | 31 | 13 |
| 358 | 15{151} | 11{319} | 9{151,319} | CN(CC1COCCO1)c1nnnn1CCc1ccc(F)cc1F             | 74 | 36 |
| 359 | 15{152} | 11{299} | 9{152,299} | COC(Cn1nnnc1N1CCC(CO)(CC1)OC)c1cccc1           | 0  | 0  |
| 360 | 15{153} | 11{401} | 9{153,401} | NC(=O)C1CCN(CC1)c1nnnn1CC1C2CC3CC(C<br>2)CC1C3 | 0  | 0  |
| 361 | 15{154} | 11{299} | 9{154,299} | COc1cc(Cn2nnnc2N2CCC(CO)(CC2)OC)ccc1C          | 36 | 17 |
| 362 | 15{155} | 11{328} | 9{155,328} | CC1CC(C)CN(C1)C(C)(C)Cn1nnnc1N1CCOCC<br>1      | 0  | 0  |
| 363 | 15{156} | 11{355} | 9{156,355} | CC1CCCN(C1)C(C)(C)Cn1nnnc1N(C)Cc1cnn(C<br>)c1  | 0  | 0  |
| 364 | 15{157} | 11{298} | 9{157,298} | Cn1cc(Cn2nnnc2N2CCCC(C2)C2(C)OCCO2)cn<br>1     | 35 | 18 |
| 365 | 15{157} | 11{297} | 9{157,297} | Cn1cc(Cn2nnnc2N2CCC(CC2)C2(C)OCCO2)cn<br>1     | 25 | 13 |
| 366 | 15{158} | 11{422} | 9{158,422} | CC1CCCC(Cn2nnnc2N2CCC(CC(N)=O)CC2)C<br>1       | 0  | 0  |
| 367 | 15{158} | 11{321} | 9{158,321} | CC1CCCC(Cn2nnnc2N2CCC(CO)CC2)C1                | 37 | 18 |
| 368 | 15{158} | 11{401} | 9{158,401} | CC1CCCC(Cn2nnnc2N2CCC(CC2)C(N)=O)C1            | 23 | 11 |
| 369 | 15{158} | 11{328} | 9{158,328} | CC1CCCC(Cn2nnnc2N2CCOCC2)C1                    | 37 | 17 |
| 370 | 15{158} | 11{423} | 9{158,423} | CC1CCCC(Cn2nnnc2N2CCNC(=O)C2)C1                | 0  | 0  |
| 371 | 15{158} | 11{424} | 9{158,424} | CC1CCCC(Cn2nnnc2N2CCCC(O)C2)C1                 | 0  | 0  |
| 372 | 15{158} | 11{299} | 9{158,299} | COC1(CO)CCN(CC1)c1nnnn1CC1CCCC(C)C1            | 12 | 6  |
| 373 | 15{159} | 11{346} | 9{159,346} | CCN(C)c1nnnn1Cc1cccc(NC(=O)C2CCCO2)c1          | 31 | 15 |
| 374 | 15{160} | 11{304} | 9{160,304} | CC(Cn1nnnc1N1CCCC(CNC(=O)C(C)C)C1)C1<br>CC1    | 27 | 14 |

|     |         |         |            |                                         |    |    |
|-----|---------|---------|------------|-----------------------------------------|----|----|
| 375 | 15{161} | 11{328} | 9{161,328} | BrC1ccc(CCN2nnc2N2CCOCC2)s1             | 34 | 17 |
| 376 | 15{162} | 11{298} | 9{162,298} | COCC(C)Cn1nnc1N1CCCC(C1)C1(C)OCCO1      | 20 | 10 |
| 377 | 15{162} | 11{297} | 9{162,297} | COCC(C)Cn1nnc1N1CCC(CC1)C1(C)OCCO1      | 26 | 13 |
| 378 | 15{163} | 11{322} | 9{163,322} | CN(C1CC1)c1nnnn1Cc1ccc(NC(=O)c2ccco2)cc | 22 | 11 |
| 379 | 15{163} | 11{346} | 9{163,346} | CCN(C)c1nnnn1Cc1ccc(NC(=O)c2ccco2)cc1   | 0  | 0  |
| 380 | 15{164} | 11{284} | 9{164,284} | CC1(C)CN(CCO1)c1nnnn1CCc1cn[nH]c1       | 13 | 6  |
| 381 | 15{165} | 11{299} | 9{165,299} | COC1(CO)CCN(CC1)c1nnnn1CC(Br)=C         | 66 | 30 |
| 382 | 15{166} | 11{78}  | 9{166,78}  | COc1ccc2CN(CCCc2c1)c1nnnn1Cc1cc(C)no1   | 0  | 0  |
| 383 | 15{166} | 11{340} | 9{166,340} | Cc1cc(Cn2nnc2N2CCCCC2)on1               | 44 | 21 |
| 384 | 15{166} | 11{103} | 9{166,103} | Cc1cc(Cn2nnc2N2CCc3[nH]c4ccc(C)cc4c3C2) | 0  | 0  |
| 385 | 15{166} | 11{425} | 9{166,425} | COCC1=CCN(CC1)c1nnnn1Cc1cc(C)no1        | 11 | 5  |
| 386 | 15{167} | 11{401} | 9{167,401} | NC(=O)C1CCN(CC1)c1nnnn1CCc1cccc(Cl)c1   | 25 | 12 |
| 387 | 15{168} | 11{319} | 9{168,319} | CN(CC1COCCO1)c1nnnn1CCc1ccc(F)c(F)c1    | 59 | 30 |
| 388 | 15{169} | 11{322} | 9{169,322} | CN(C1CC1)c1nnnn1CCc1ccc(NC(C)=O)cc1     | 32 | 16 |
| 389 | 15{170} | 11{338} | 9{170,338} | CCC1CN(CC(CC)O1)c1nnnn1CCOCC1CC1        | 35 | 17 |
| 390 | 15{171} | 11{302} | 9{171,302} | CN(CCOc1ccc(F)cc1)c1nnnn1CCNC(=O)C1CC   | 0  | 0  |
| 391 | 15{171} | 11{349} | 9{171,349} | O=C(NCCn1nnc1N1CCCC(CC#C)C1)C1CC1       | 0  | 0  |
| 392 | 15{172} | 11{426} | 9{172,426} | COC(=O)C1CC11CCN(CC1)c1nnnn1Cc1occc1    | 0  | 0  |
| 393 | 15{172} | 11{427} | 9{172,427} | CN1CCC2(CCN(CC2)c2nnnn2Cc2occc2C)C1=    | 0  | 0  |
| 394 | 15{172} | 11{428} | 9{172,428} | Cc1ccoc1Cn1nnc1N1CCC2(CCNC(=O)O2)CC     | 27 | 13 |



|     |         |         |            |                                                        |    |    |
|-----|---------|---------|------------|--------------------------------------------------------|----|----|
| 395 | 15{172} | 11{429} | 9{172,429} | Cc1ccoc1Cn1nnnc1N1CCOC2(CCOCC2)CC1                     | 32 | 16 |
| 396 | 15{172} | 11{430} | 9{172,430} | CCOC(=O)[1C@@H]1[1C@@H]2CCN(C[1C@H]12)c1nnnn1Cc1occc1C | 27 | 14 |
| 397 | 15{172} | 11{419} | 9{172,419} | Cc1ccoc1Cn1nnnc1N1C2CCC1CC1(CC1(F)F)C2                 | 39 | 21 |
| 398 | 15{172} | 11{63}  | 9{172,63}  | Cc1ccoc1Cn1nnnc1N1CCN2C(CNC2=O)C1                      | 0  | 0  |
| 399 | 15{172} | 11{431} | 9{172,431} | Cc1ccoc1Cn1nnnc1N1CCOC2(CCSC2)C1                       | 0  | 0  |
| 400 | 15{172} | 11{432} | 9{172,432} | Cc1ccoc1Cn1nnnc1N1CCOCC2(CCOCC2)C1                     | 33 | 16 |
| 401 | 15{172} | 11{433} | 9{172,433} | CC1CN(CC2(CCOCC2)O1)c1nnnn1Cc1occc1C                   | 32 | 16 |
| 402 | 15{172} | 11{434} | 9{172,434} | Cc1ccoc1Cn1nnnc1N1CCOC2(CCOCC2)C1                      | 29 | 14 |
| 403 | 15{172} | 11{435} | 9{172,435} | COC(=O)[1C@]12CN(C[1C@H]1COCC2)c1nnnn1Cc1occc1C        | 25 | 13 |
| 404 | 15{172} | 11{436} | 9{172,436} | COC(=O)[1C@]12CCC[1C@H]1N(CC2)c1nnnn1Cc1occc1C         | 25 | 12 |
| 405 | 15{172} | 11{437} | 9{172,437} | CCS(=O)(=O)N1CCN(CC1)c1nnnn1Cc1occc1C                  | 0  | 0  |
| 406 | 15{172} | 11{438} | 9{172,438} | Cc1ccoc1Cn1nnnc1N1C[1C@@H]2CCC[1C@@]2(C1)C(N)=O        | 31 | 15 |
| 407 | 15{172} | 11{421} | 9{172,421} | Cc1ccoc1Cn1nnnc1N1CCC2(C1)OCc1cccc21                   | 34 | 17 |
| 408 | 15{172} | 11{104} | 9{172,104} | Cc1ccoc1Cn1nnnc1N1CCOCC2(CCCC2)C1                      | 0  | 0  |
| 409 | 15{173} | 11{321} | 9{173,321} | Cc1cccc1C(C)(C)Cn1nnnc1N1CCC(CO)CC1                    | 21 | 10 |
| 410 | 15{173} | 11{401} | 9{173,401} | Cc1cccc1C(C)(C)Cn1nnnc1N1CCC(CC1)C(N)=O                | 33 | 17 |
| 411 | 15{174} | 11{321} | 9{174,321} | COc1cccc1C(C)(C)Cn1nnnc1N1CCC(CO)CC1                   | 19 | 10 |
| 412 | 15{175} | 11{299} | 9{175,299} | CCC(Cn1nnnc1N1CCC(CO)(CC1)OC)c1cccc1                   | 64 | 29 |
| 413 | 15{176} | 11{391} | 9{176,391} | CN(CC1CC1)c1nnnn1Cc1ccc(cc1)C(=O)N1CCC1                | 22 | 11 |
| 414 | 15{176} | 11{322} | 9{176,322} | CN(C1CC1)c1nnnn1Cc1ccc(cc1)C(=O)N1CCCC                 | 39 | 20 |

1

|     |         |         |            |                                                       |    |    |
|-----|---------|---------|------------|-------------------------------------------------------|----|----|
| 415 | 15{177} | 11{298} | 9{177,298} | <chem>Cc1occc1Cn1nnnc1N1CCCC(C1)C1(C)OCCO1</chem>     | 13 | 7  |
| 416 | 15{177} | 11{297} | 9{177,297} | <chem>Cc1occc1Cn1nnnc1N1CCC(CC1)C1(C)OCCO1</chem>     | 0  | 0  |
| 417 | 15{178} | 11{302} | 9{178,302} | <chem>CN(CCOc1ccc(F)cc1)c1nnnn1CC1CCCNC1=O</chem>     | 16 | 7  |
| 418 | 15{179} | 11{319} | 9{179,319} | <chem>CN(CC1COCCO1)c1nnnn1CCc1cc(F)cc(F)c1</chem>     | 45 | 24 |
| 419 | 15{180} | 11{439} | 9{180,439} | <chem>CN(C1CCCCC1)c1nnnn1Cc1nceccc1C</chem>           | 0  | 0  |
| 420 | 15{181} | 11{338} | 9{181,338} | <chem>CCC1CN(CC(CC)O1)c1nnnn1Cc1nc2CCc2s1</chem>      | 0  | 0  |
| 421 | 15{182} | 11{328} | 9{182,328} | <chem>C(c1ccc(OC2CCCC2)cc1)n1nnnc1N1CCOCC1</chem>     | 0  | 0  |
| 422 | 15{183} | 11{328} | 9{183,328} | <chem>Clc1ccc(CCCn2nnnc2N2CCOCC2)cc1</chem>           | 0  | 0  |
| 423 | 15{183} | 11{328} | 9{183,328} | <chem>Clc1ccc(CCCn2nnnc2N2CCOCC2)cc1</chem>           | 0  | 0  |
| 424 | 15{184} | 11{337} | 9{184,337} | <chem>COc1ccccc1C1(Cn2nnnc2N(C)CC2CCOC2)CC1</chem>    | 47 | 24 |
| 425 | 15{185} | 11{349} | 9{185,349} | <chem>C#CCC1CCCN(C1)c1nnnn1C1CCSCC1</chem>            | 32 | 16 |
| 426 | 15{185} | 11{338} | 9{185,338} | <chem>CCC1CN(CC(CC)O1)c1nnnn1C1CCSCC1</chem>          | 0  | 0  |
| 427 | 15{185} | 11{327} | 9{185,327} | <chem>C1CC(N(C1)c1nnnn1C1CCSCC1)c1ccsc1</chem>        | 37 | 17 |
| 428 | 15{186} | 11{401} | 9{186,401} | <chem>CC(C)(Cn1nnnc1N1CCC(CC1)C(N)=O)c1ccccc1F</chem> | 24 | 11 |
| 429 | 15{187} | 11{337} | 9{187,337} | <chem>CN(CC1CCOC1)c1nnnn1CCc1c(C)[nH]c2ccccc12</chem> | 26 | 13 |
| 430 | 15{188} | 11{349} | 9{188,349} | <chem>O=C1OCCN1CCCN1nnnc1N1CCCC(CC#C)C1</chem>        | 29 | 15 |
| 431 | 15{188} | 11{338} | 9{188,338} | <chem>CCC1CN(CC(CC)O1)c1nnnn1CCCN1CCOC1=O</chem>      | 60 | 27 |
| 432 | 15{189} | 11{440} | 9{189,440} | <chem>CC(CC#N)N(C)c1nnnn1C1CCCc2sccc12</chem>         | 0  | 0  |
| 433 | 15{190} | 11{341} | 9{190,341} | <chem>COc1ccc(CCN2nnnc2N2CCCC2)cc1F</chem>            | 78 | 37 |

|     |         |         |            |                                                          |    |    |
|-----|---------|---------|------------|----------------------------------------------------------|----|----|
| 434 | 15{191} | 11{338} | 9{191,338} | CCC1CN(CC(CC)O1)c1nnnn1Cc1cccc(CO)c1                     | 20 | 10 |
| 435 | 15{192} | 11{328} | 9{192,328} | CCc1cccc2c(CCN3nnnc3N3CCOCC3)c[nH]c12                    | 9  | 4  |
| 436 | 15{193} | 11{350} | 9{193,350} | CN(CCC=C)c1nnnn1Cc1cccc(CN2CCCC2=O)c1                    | 23 | 12 |
| 437 | 15{194} | 11{297} | 9{194,297} | CCn1cc(Cn2nnnc2N2CCC(CC2)C2(C)OCCO2)c<br>n1              | 33 | 16 |
| 438 | 15{194} | 11{298} | 9{194,298} | CCn1cc(Cn2nnnc2N2CCCC(C2)C2(C)OCCO2)c<br>n1              | 26 | 13 |
| 439 | 15{195} | 11{441} | 9{195,441} | Cc1c(Cn2nnnc2N2CCS(=O)C(C)(C)CC2)cnn1C                   | 0  | 0  |
| 440 | 15{195} | 11{326} | 9{195,326} | Cc1c(Cn2nnnc2N2CCC(=CC2)C(F)(F)F)cnn1C                   | 0  | 0  |
| 441 | 15{195} | 11{442} | 9{195,442} | Cc1c(Cn2nnnc2N2CCC(C2)c2cccc(C)c2)cnn1C                  | 0  | 0  |
| 442 | 15{195} | 11{182} | 9{195,182} | CN(Cc1ccc(C)c(C)c1)c1nnnn1Cc1cnn(C)c1C                   | 0  | 0  |
| 443 | 15{195} | 11{443} | 9{195,443} | C[C@H]1CN(C[C@@H](C)O1)c1nnnn1Cc1cnn<br>(C)c1C           | 17 | 8  |
| 444 | 15{196} | 11{297} | 9{196,297} | Cn1ccc(Cn2nnnc2N2CCC(CC2)C2(C)OCCO2)n<br>1               | 0  | 0  |
| 445 | 15{196} | 11{298} | 9{196,298} | Cn1ccc(Cn2nnnc2N2CCCC(C2)C2(C)OCCO2)n<br>1               | 42 | 21 |
| 446 | 15{197} | 11{105} | 9{197,105} | CN1CCN(Cc2cccc12)c1nnnn1CC(F)F                           | 0  | 0  |
| 447 | 15{197} | 11{444} | 9{197,444} | COc1ccc(cc1)C1CN(CCO1)c1nnnn1CC(F)F                      | 0  | 0  |
| 448 | 15{197} | 11{445} | 9{197,445} | COc1cc2CCN(Cc2cc1OC)c1nnnn1CC(F)F                        | 0  | 0  |
| 449 | 15{198} | 11{297} | 9{198,297} | CC(c1cnn(C)c1)n1nnnc1N1CCC(CC1)C1(C)OC<br>CO1            | 0  | 0  |
| 450 | 15{198} | 11{298} | 9{198,298} | CC(c1cnn(C)c1)n1nnnc1N1CCCC(C1)C1(C)OC<br>CO1            | 0  | 0  |
| 451 | 15{199} | 11{446} | 9{199,446} | COC(=O)[1C@@H]1CN(C[1C@H]1C)c1nnnn1<br>Cc1cccc2[nH]ccc12 | 16 | 8  |
| 452 | 15{199} | 11{96}  | 9{199,96}  | CC(C)OC1CCN(CC1)c1nnnn1Cc1cccc2[nH]ccc<br>12             | 20 | 10 |

|     |         |         |            |                                                   |    |    |
|-----|---------|---------|------------|---------------------------------------------------|----|----|
| 453 | 15{199} | 11{299} | 9{199,299} | COC1(CO)CCN(CC1)c1nnnn1Cc1cccc2[nH]ccc<br>12      | 3  | 2  |
| 454 | 15{199} | 11{320} | 9{199,320} | COC(=O)C1CCN(CC1)c1nnnn1Cc1cccc2[nH]cc<br>c12     | 12 | 6  |
| 455 | 15{200} | 11{356} | 9{200,356} | CN(CC1CCC1)c1nnnn1Cc1cccc(c1)-n1cncn1             | 35 | 18 |
| 456 | 15{201} | 11{327} | 9{201,327} | C1CC(N(C1)c1nnnn1C1CCCOC1)c1ccsc1                 | 10 | 5  |
| 457 | 15{201} | 11{302} | 9{201,302} | CN(CCOc1ccc(F)cc1)c1nnnn1C1CCCOC1                 | 0  | 0  |
| 458 | 15{201} | 11{349} | 9{201,349} | C#CCC1CCCN(C1)c1nnnn1C1CCCOC1                     | 35 | 17 |
| 459 | 15{202} | 11{304} | 9{202,304} | CCC1(Cn2nnnc2N2CCCC(CNC(=O)C(C)C)C2)<br>CCC1      | 34 | 16 |
| 460 | 15{203} | 11{338} | 9{203,338} | CCC1CN(CC(CC)O1)c1nnnn1CC1(C)CCCO1                | 15 | 9  |
| 461 | 15{203} | 11{339} | 9{203,339} | CN(Cc1cccc(F)c1)c1nnnn1CC1(C)CCCO1                | 29 | 14 |
| 462 | 15{204} | 11{447} | 9{204,447} | CCN1CC(CC1=O)n1nnnc1N1CCc2cccc2C1                 | 9  | 4  |
| 463 | 15{204} | 11{448} | 9{204,448} | CCOC(=O)C1CCN(CC1)c1nnnn1C1CN(CC)C(=<br>O)C1      | 22 | 10 |
| 464 | 15{204} | 11{449} | 9{204,449} | CCN1CC(CC1=O)n1nnnc1N1CC(C)(C)OC(C)(C<br>)C1      | 0  | 0  |
| 465 | 15{204} | 11{106} | 9{204,106} | CCN1CC(CC1=O)n1nnnc1N1CCc2cccc2CC1                | 0  | 0  |
| 466 | 15{204} | 11{450} | 9{204,450} | CCN1CC(CC1=O)n1nnnc1N1CCN(CC1)c1cccc<br>1         | 0  | 0  |
| 467 | 15{204} | 11{451} | 9{204,451} | CCOC(=O)N1CCN(CC1)c1nnnn1C1CN(CC)C(=<br>O)C1      | 0  | 0  |
| 468 | 15{204} | 11{349} | 9{204,349} | CCN1CC(CC1=O)n1nnnc1N1CCCC(CC#C)C1                | 0  | 0  |
| 469 | 15{204} | 11{452} | 9{204,452} | CCOC(=O)[C@@H]1CCCN(C1)c1nnnn1C1CN(<br>CC)C(=O)C1 | 0  | 0  |
| 470 | 15{204} | 11{453} | 9{204,453} | CCOC(=O)C1CCCN(C1)c1nnnn1C1CN(CC)C(=<br>O)C1      | 0  | 0  |
| 471 | 15{204} | 11{302} | 9{204,302} | CCN1CC(CC1=O)n1nnnc1N(C)CCOc1ccc(F)cc<br>1        | 16 | 8  |

|     |         |         |            |                                                      |    |    |
|-----|---------|---------|------------|------------------------------------------------------|----|----|
| 472 | 15{204} | 11{327} | 9{204,327} | CCN1CC(CC1=O)n1nnnc1N1CCCC1c1ccsc1                   | 32 | 16 |
| 473 | 15{205} | 11{435} | 9{205,435} | COC(=O)[1C@]12CN(C[1C@H]1COCC2)c1nn<br>nn1CC1=CCCCC1 | 15 | 7  |
| 474 | 15{205} | 11{454} | 9{205,454} | CC1OCCC11CN(CC(C)O1)c1nnnn1CC1=CCCC<br>C1            | 12 | 6  |
| 475 | 15{205} | 11{438} | 9{205,438} | NC(=O)[1C@]12CCC[1C@H]1CN(C2)c1nnnn1<br>CC1=CCCCC1   | 28 | 14 |
| 476 | 15{205} | 11{433} | 9{205,433} | CC1CN(CC2(CCOCC2)O1)c1nnnn1CC1=CCCC<br>C1            | 31 | 16 |
| 477 | 15{205} | 11{455} | 9{205,455} | CC1OCCC11CN(CCO1)c1nnnn1CC1=CCCCC1                   | 0  | 0  |
| 478 | 15{205} | 11{335} | 9{205,335} | O=C1NC(=O)[C@@H]2CN(C[C@H]12)c1nnnn<br>1CC1=CCCCC1   | 0  | 0  |
| 479 | 15{205} | 11{432} | 9{205,432} | C(C1=CCCCC1)n1nnnc1N1CCOCC2(CCOCC2)<br>C1            | 25 | 13 |
| 480 | 15{205} | 11{429} | 9{205,429} | C(C1=CCCCC1)n1nnnc1N1CCOC2(CCOCC2)C<br>C1            | 0  | 0  |
| 481 | 15{205} | 11{188} | 9{205,188} | CCOC1CC2(C1)CCN(C2)c1nnnn1CC1=CCCC<br>1              | 32 | 16 |
| 482 | 15{205} | 11{431} | 9{205,431} | C(C1=CCCCC1)n1nnnc1N1CCOC2(CCSC2)C1                  | 12 | 6  |
| 483 | 15{205} | 11{428} | 9{205,428} | O=C1NCCC2(CCN(CC2)c2nnnn2CC2=CCCC<br>2)O1            | 16 | 8  |
| 484 | 15{205} | 11{434} | 9{205,434} | C(C1=CCCCC1)n1nnnc1N1CCOC2(CCOCC2)C<br>1             | 10 | 5  |
| 485 | 15{205} | 11{304} | 9{205,304} | CC(C)C(=O)NCC1CCCN(C1)c1nnnn1CC1=CC<br>CCC1          | 8  | 4  |
| 486 | 15{205} | 11{456} | 9{205,456} | C(C1=CCCCC1)n1nnnc1N1CCC2(CC1)OCCCO<br>2             | 29 | 14 |
| 487 | 15{206} | 11{341} | 9{206,341} | Clc1ccc(cc1)-c1noc(CCN2nnnc2N2CCCC2)n1               | 25 | 12 |
| 488 | 15{207} | 11{302} | 9{207,302} | CN(CCOc1ccc(F)cc1)c1nnnn1CC1(C)CCOC1                 | 17 | 8  |
| 489 | 15{208} | 11{338} | 9{208,338} | CCC1CN(CC(CC)O1)c1nnnn1Cc1ccn(n1)C(C)C               | 61 | 31 |
| 490 | 15{209} | 11{350} | 9{209,350} | CN(CCC=C)c1nnnn1C1CCN(CC(F)(F)F)C1=O                 | 18 | 9  |

|     |         |         |            |                                                                |    |    |
|-----|---------|---------|------------|----------------------------------------------------------------|----|----|
| 491 | 15{210} | 11{298} | 9{210,298} | Cc1cc(Cn2nnnc2N2CCCC(C2)C2(C)OCCO2)nc<br>n1                    | 0  | 0  |
| 492 | 15{210} | 11{297} | 9{210,297} | Cc1cc(Cn2nnnc2N2CCC(CC2)C2(C)OCCO2)nc<br>n1                    | 0  | 0  |
| 493 | 15{211} | 11{457} | 9{211,457} | CCc1ncc2C3CCC(Cc2n1)N3c1nnnn1CC1CC1(C<br>)C                    | 8  | 4  |
| 494 | 15{211} | 11{359} | 9{211,359} | CC1(C)CC1Cn1nnnc1N1C[C@@H]2C[C@H](C<br>1)c1cccc(=O)n1C2        | 27 | 13 |
| 495 | 15{211} | 11{458} | 9{211,458} | CO[1C@@H]1CS(=O)(=O)[1C@H]2CN(C[1C<br>@@H]12)c1nnnn1CC1CC1(C)C | 20 | 10 |
| 496 | 15{212} | 11{327} | 9{212,327} | O=C1CNC(=O)N1CCn1nnnc1N1CCCC1c1ccsc1                           | 57 | 26 |
| 497 | 15{212} | 11{349} | 9{212,349} | O=C1CNC(=O)N1CCn1nnnc1N1CCCC(CC#C)<br>C1                       | 21 | 10 |
| 498 | 15{213} | 11{297} | 9{213,297} | CC1(OCCO1)C1CCN(CC1)c1nnnn1Cc1ccn1                             | 0  | 0  |
| 499 | 15{213} | 11{298} | 9{213,298} | CC1(OCCO1)C1CCCN(C1)c1nnnn1Cc1ccn1                             | 0  | 0  |
| 500 | 15{214} | 11{320} | 9{214,320} | COC(=O)C1CCN(CC1)c1nnnn1Cc1cc(F)cc(OC)<br>c1                   | 43 | 20 |
| 501 | 15{215} | 11{369} | 9{215,369} | CC1CN(CCO1)c1nnnn1CC1CSCCS1                                    | 30 | 15 |
| 502 | 15{216} | 11{319} | 9{216,319} | CCSc1cccc(Cn2nnnc2N(C)CC2COCCO2)c1                             | 57 | 27 |
| 503 | 15{217} | 11{337} | 9{217,337} | CN(CC1CCOC1)c1nnnn1CC1CCC(CC1)C(F)(F)<br>F                     | 49 | 24 |
| 504 | 15{218} | 11{288} | 9{218,288} | CC(=O)N1CCCN(CC1)c1nnnn1CC1C(C)(C)C1(<br>C)C                   | 12 | 6  |
| 505 | 15{218} | 11{395} | 9{218,395} | CC1(C)C(Cn2nnnc2N2CCOC3(CCOC3)C2)C1(<br>C)C                    | 0  | 0  |
| 506 | 15{219} | 11{327} | 9{219,327} | O=C1CC(Cn2nnnc2N2CCCC2c2ccsc2)CN1                              | 32 | 14 |
| 507 | 15{219} | 11{365} | 9{219,365} | CC1CC(CN1c1nnnn1CC1CNC(=O)C1)c1ccc(C)<br>cc1                   | 12 | 6  |
| 508 | 15{219} | 11{302} | 9{219,302} | CN(CCOc1ccc(F)cc1)c1nnnn1CC1CNC(=O)C1                          | 0  | 0  |
| 509 | 15{220} | 11{304} | 9{220,304} | CC(C)C(=O)NCC1CCCN(C1)c1nnnn1CCC1CC<br>C1                      | 28 | 13 |

|     |         |         |            |                                                 |     |    |
|-----|---------|---------|------------|-------------------------------------------------|-----|----|
| 510 | 15{220} | 11{288} | 9{220,288} | CC(=O)N1CCCN(CC1)c1nnnn1CCC1CCC1                | 32  | 16 |
| 511 | 15{221} | 11{288} | 9{221,288} | CC(C)CC1(Cn2nnnc2N2CCCN(CC2)C(C)=O)C<br>CC1     | 27  | 13 |
| 512 | 15{221} | 11{395} | 9{221,395} | CC(C)CC1(Cn2nnnc2N2CCOC3(CCOC3)C2)C<br>CC1      | 0   | 0  |
| 513 | 15{222} | 11{411} | 9{222,411} | CCC1CCCN(C1)c1nnnn1Cc1snnc1C                    | 10  | 5  |
| 514 | 15{223} | 11{333} | 9{223,333} | CC1(C)CN(CCS1)c1nnnn1Cc1ccc(F)cn1               | 12  | 6  |
| 515 | 15{224} | 11{459} | 9{224,459} | CCN(CC)c1nnnn1Cc1nnc(C)s1                       | 9   | 4  |
| 516 | 15{225} | 11{366} | 9{225,366} | CN(CC(C)(C)O)c1nnnn1Cc1ccc(C)c(F)c1             | 0   | 0  |
| 517 | 15{225} | 11{399} | 9{225,399} | COCC1(C)CCN(C1)c1nnnn1Cc1ccc(C)c(F)c1           | 33  | 15 |
| 518 | 15{225} | 11{367} | 9{225,367} | CN(CC(=O)N1CCOCC1)c1nnnn1Cc1ccc(C)c(F)<br>c1    | 0   | 0  |
| 519 | 15{226} | 11{288} | 9{226,288} | CC(=O)N1CCCN(CC1)c1nnnn1C1CCCC(C)(C)<br>C1      | 21  | 9  |
| 520 | 15{227} | 11{460} | 9{227,460} | Fc1ccc(cc1)N1CCN(CC1)c1nnnn1OC1CCCC1            | 0   | 0  |
| 521 | 15{227} | 11{446} | 9{227,446} | COC(=O)[1C@@H]1CN(C[1C@H]1C)c1nnnn1<br>OC1CCCC1 | 0   | 0  |
| 522 | 15{227} | 11{461} | 9{227,461} | Cc1ccc(cc1)N1CCN(CC1)c1nnnn1OC1CCCC1            | 0   | 0  |
| 523 | 15{227} | 11{462} | 9{227,462} | Cc1ccccc1N1CCN(CC1)c1nnnn1OC1CCCC1              | 0   | 0  |
| 524 | 15{227} | 11{463} | 9{227,463} | Cc1ccc(cc1C)N1CCN(CC1)c1nnnn1OC1CCCC1           | 0   | 0  |
| 525 | 15{227} | 11{464} | 9{227,464} | Cc1ccccc1N1CCN(CC1)c1nnnn1OC1CCCC1              | 0   | 0  |
| 526 | 15{227} | 11{465} | 9{227,465} | CC1CCN(CC1C)c1nnnn1OC1CCCC1                     | 0   | 0  |
| 527 | 15{228} | 11{355} | 9{228,355} | CCOC(=O)C1(Cn2nnnc2N(C)Cc2cnn(C)c2)CCC<br>1     | 21  | 11 |
| 528 | 15{229} | 11{327} | 9{229,327} | CC1(C)CC(CCO1)n1nnnc1N1CCCC1c1ccsc1             | 180 | 92 |
| 529 | 15{229} | 11{349} | 9{229,349} | CC1(C)CC(CCO1)n1nnnc1N1CCCC(CC#C)C1             | 37  | 18 |

|     |         |         |            |                                                           |    |    |
|-----|---------|---------|------------|-----------------------------------------------------------|----|----|
| 530 | 15{229} | 11{338} | 9{229,338} | CCC1CN(CC(CC)O1)c1nnnn1C1CCOC(C)(C)C<br>1                 | 42 | 19 |
| 531 | 15{230} | 11{349} | 9{230,349} | O=C(CCN1nnnc1N1CCCC(CC#C)C1)N1CCCC<br>C1                  | 29 | 13 |
| 532 | 15{230} | 11{350} | 9{230,350} | CN(CCC=C)c1nnnn1CCC(=O)N1CCCCC1                           | 18 | 9  |
| 533 | 15{231} | 11{349} | 9{231,349} | C#CCC1CCCN(C1)c1nnnn1CCC1CC1                              | 37 | 17 |
| 534 | 15{231} | 11{288} | 9{231,288} | CC(=O)N1CCCN(CC1)c1nnnn1CCC1CC1                           | 25 | 12 |
| 535 | 15{231} | 11{318} | 9{231,318} | C(Cn1nnnc1N1CCn2c(C1)nnc2-<br>c1cccc1)C1CC1               | 0  | 0  |
| 536 | 15{232} | 11{466} | 9{232,466} | COC[C@@H](C)n1nnnc1N1CCCC2(C1)Oc1ccc<br>cc1C=C2           | 26 | 12 |
| 537 | 15{232} | 11{315} | 9{232,315} | COC[C@@H](C)n1nnnc1N1C[C@@H]2C[C@<br>H]1CN2C(=O)OC(C)(C)C | 20 | 10 |
| 538 | 15{232} | 11{467} | 9{232,467} | COC[C@@H](C)n1nnnc1N1C2CCC1CC(CC(F)<br>(F)F)C2            | 33 | 15 |
| 539 | 15{233} | 11{349} | 9{233,349} | C#CCC1CCCN(C1)c1nnnn1CC1CCCS1                             | 29 | 14 |
| 540 | 15{234} | 11{468} | 9{234,468} | CC(=C)CCn1nnnc1N1CCC(CC1)[1C@@H]1OC<br>C[1C@H]1C(N)=O     | 21 | 10 |
| 541 | 15{235} | 11{469} | 9{235,469} | COC1CCC(Cn2nnnc2N2CCSCC2C)CC1                             | 12 | 6  |
| 542 | 15{236} | 11{349} | 9{236,349} | CC1CC(CC(C)O1)n1nnnc1N1CCCC(CC#C)C1                       | 0  | 0  |
| 543 | 15{236} | 11{327} | 9{236,327} | CC1CC(CC(C)O1)n1nnnc1N1CCCC1c1ccsc1                       | 40 | 21 |
| 544 | 15{236} | 11{338} | 9{236,338} | CCC1CN(CC(CC)O1)c1nnnn1C1CC(C)OC(C)C<br>1                 | 34 | 15 |
| 545 | 15{237} | 11{302} | 9{237,302} | CC1CC(CCO1)n1nnnc1N(C)CCOc1ccc(F)cc1                      | 31 | 14 |
| 546 | 15{238} | 11{318} | 9{238,318} | C1CC(C=C1)n1nnnc1N1CCn2c(C1)nnc2-<br>c1cccc1              | 0  | 0  |
| 547 | 15{239} | 11{298} | 9{239,298} | CC1(OCCO1)C1CCCN(C1)c1nnnn1CC1CCC=C<br>1                  | 28 | 14 |
| 548 | 15{239} | 11{468} | 9{239,468} | NC(=O)[1C@@H]1CCO[1C@H]1C1CCN(CC1)<br>c1nnnn1CC1CCC=C1    | 43 | 20 |



|     |         |         |            |                                                         |     |    |
|-----|---------|---------|------------|---------------------------------------------------------|-----|----|
| 549 | 15{239} | 11{470} | 9{239,470} | CC(C)(C)OC(=O)NC1CCN(C1)c1nnnn1CC1CC<br>C=C1            | 52  | 25 |
| 550 | 15{239} | 11{471} | 9{239,471} | CC(C)(C)OC(=O)N[C@H]1CCN(C1)c1nnnn1C<br>C1CCC=C1        | 0   | 0  |
| 551 | 15{239} | 11{360} | 9{239,360} | CC(C)(C)OC(=O)NC1CCN(CC1)c1nnnn1CC1C<br>CC=C1           | 35  | 17 |
| 552 | 15{239} | 11{297} | 9{239,297} | CC1(OCCO1)C1CCN(CC1)c1nnnn1CC1CCC=C<br>1                | 53  | 26 |
| 553 | 15{239} | 11{287} | 9{239,287} | O=C(N1CCN(CC1)c1nnnn1CC1CCC=C1)c1ccc<br>o1              | 22  | 12 |
| 554 | 15{239} | 11{359} | 9{239,359} | O=c1cccc2[C@@H]3C[C@@H](CN(C3)c3nnnn<br>3CC3CCC=C3)Cn12 | 17  | 8  |
| 555 | 15{239} | 11{320} | 9{239,320} | COC(=O)C1CCN(CC1)c1nnnn1CC1CCC=C1                       | 20  | 10 |
| 556 | 15{239} | 11{358} | 9{239,358} | CC(C)(C)OC(=O)NCC1CCN(C1)c1nnnn1CC1C<br>CC=C1           | 108 | 56 |
| 557 | 15{239} | 11{472} | 9{239,472} | CC(C)(C)OC(=O)N[C@@H]1CCN(C1)c1nnnn1<br>CC1CCC=C1       | 44  | 22 |
| 558 | 15{239} | 11{375} | 9{239,375} | C(C1CCC=C1)n1nnnc1N1CCN(CC1)c1ncccn1                    | 26  | 13 |
| 559 | 15{240} | 11{304} | 9{240,304} | CC(C)C(=O)NCC1CCCN(C1)c1nnnn1CCCCC1<br>CC1              | 16  | 7  |
| 560 | 15{241} | 11{349} | 9{241,349} | COC1(Cn2nnnc2N2CCCC(CC#C)C2)CCOCC1                      | 33  | 17 |
| 561 | 15{241} | 11{327} | 9{241,327} | COC1(Cn2nnnc2N2CCCC2c2ccsc2)CCOCC1                      | 61  | 29 |
| 562 | 15{241} | 11{338} | 9{241,338} | CCC1CN(CC(CC)O1)c1nnnn1CC1(CCOCC1)O<br>C                | 49  | 25 |
| 563 | 15{242} | 11{338} | 9{242,338} | CCC1CN(CC(CC)O1)c1nnnn1Cc1cc(no1)C1CC<br>1              | 55  | 23 |
| 564 | 15{243} | 11{322} | 9{243,322} | CN(C1CC1)c1nnnn1Cc1nc(cs1)C(F)(F)F                      | 43  | 20 |
| 565 | 15{244} | 11{473} | 9{244,473} | CCOC1CC(n2nnnc2N2CC[C@@H](C2)OCC)C<br>11CCCC1           | 43  | 21 |
| 566 | 15{244} | 11{474} | 9{244,474} | CCOC1CC(n2nnnc2N2CCC(C2)SC)C11CCCC1                     | 45  | 23 |
| 567 | 15{245} | 11{288} | 9{245,288} | CC(=O)N1CCCN(CC1)c1nnnn1C1CCCC1(F)F                     | 0   | 0  |

|     |         |         |            |                                                   |    |    |
|-----|---------|---------|------------|---------------------------------------------------|----|----|
| 568 | 15{246} | 11{401} | 9{246,401} | CC(C)(Cn1nnnc1N1CCC(CC1)C(N)=O)c1cccc(F)c1        | 0  | 0  |
| 569 | 15{247} | 11{298} | 9{247,298} | CSCC(C)n1nnnc1N1CCCC(C1)C1(C)OCCO1                | 12 | 7  |
| 570 | 15{247} | 11{297} | 9{247,297} | CSCC(C)n1nnnc1N1CCC(CC1)C1(C)OCCO1                | 14 | 6  |
| 571 | 15{248} | 11{284} | 9{248,284} | CC1(C)CN(CCO1)c1nnnn1Cc1cccc2neccc12              | 5  | 3  |
| 572 | 15{248} | 11{351} | 9{248,351} | CCN1CCN(CC1=O)c1nnnn1Cc1cccc2neccc12              | 0  | 0  |
| 573 | 15{248} | 11{475} | 9{248,475} | C(c1cccc2neccc12)n1nnnc1N1CCSCC1                  | 11 | 5  |
| 574 | 15{248} | 11{476} | 9{248,476} | FC1(F)CCN(CC1)c1nnnn1Cc1cccc2neccc12              | 6  | 3  |
| 575 | 15{248} | 11{477} | 9{248,477} | COCC1CCCN(C1)c1nnnn1Cc1cccc2neccc12               | 14 | 7  |
| 576 | 15{248} | 11{478} | 9{248,478} | C(c1cccc2neccc12)n1nnnc1N1CCCCC1                  | 9  | 5  |
| 577 | 15{248} | 11{401} | 9{248,401} | NC(=O)C1CCN(CC1)c1nnnn1Cc1cccc2neccc12            | 13 | 6  |
| 578 | 15{248} | 11{443} | 9{248,443} | C[C@H]1CN(C[C@@H](C)O1)c1nnnn1Cc1ccc<br>c2neccc12 | 10 | 5  |
| 579 | 15{249} | 11{479} | 9{249,479} | CC(Cn1nnnc1N1CCCC(C)C1)c1nc(C)cs1                 | 29 | 14 |
| 580 | 15{249} | 11{422} | 9{249,422} | CC(Cn1nnnc1N1CCC(CC(N)=O)CC1)c1nc(C)es<br>1       | 32 | 17 |
| 581 | 15{249} | 11{341} | 9{249,341} | CC(Cn1nnnc1N1CCCC1)c1nc(C)cs1                     | 22 | 11 |
| 582 | 15{249} | 11{478} | 9{249,478} | CC(Cn1nnnc1N1CCCCC1)c1nc(C)cs1                    | 19 | 10 |
| 583 | 15{249} | 11{443} | 9{249,443} | CC(Cn1nnnc1N1C[C@H](C)O[C@H](C)C1)c1n<br>c(C)cs1  | 38 | 19 |
| 584 | 15{249} | 11{480} | 9{249,480} | CC(Cn1nnnc1N1CCC(C)CC1)c1nc(C)cs1                 | 28 | 14 |
| 585 | 15{249} | 11{284} | 9{249,284} | CC(Cn1nnnc1N1CCOC(C)(C)C1)c1nc(C)cs1              | 13 | 7  |
| 586 | 15{250} | 11{278} | 9{250,278} | C(Cn1nnnc1N1CCC2(CCOC2)C1)c1nc2CCCc2s<br>1        | 22 | 11 |
| 587 | 15{250} | 11{4}   | 9{250,4}   | C(Cn1nnnc1N1CCOC2(CCC2)C1)c1nc2CCCc2s<br>1        | 0  | 0  |

|     |         |         |            |                                                     |    |    |
|-----|---------|---------|------------|-----------------------------------------------------|----|----|
| 588 | 15{250} | 11{179} | 9{250,179} | OC[C@H]1[C@@H]2CN(C[C@H]12)c1nnnn1C<br>Cc1nc2CCCCs1 | 0  | 0  |
| 589 | 15{250} | 11{481} | 9{250,481} | C(Cn1nnnc1N1C[C@H]2CC=CC[C@H]2C1)c1<br>nc2CCCCs1    | 21 | 11 |
| 590 | 15{250} | 11{482} | 9{250,482} | C(Cn1nnnc1N1CCC2(C1)OCCO2)c1nc2CCCCs<br>1           | 0  | 0  |
| 591 | 15{250} | 11{483} | 9{250,483} | C(Cn1nnnc1N1CC2CCC(C2)C1)c1nc2CCCCs1                | 0  | 0  |
| 592 | 15{251} | 11{338} | 9{251,338} | CCC1CN(CC(CC)O1)c1nnnn1Cc1sc(C)nc1C                 | 22 | 11 |
| 593 | 15{252} | 11{321} | 9{252,321} | OCC1CCN(CC1)c1nnnn1CC1(CC1)c1cccc(Cl)c<br>1         | 19 | 10 |
| 594 | 15{252} | 11{328} | 9{252,328} | Clc1cccc(c1)C1(Cn2nnnc2N2CCOCC2)CC1                 | 0  | 0  |
| 595 | 15{253} | 11{405} | 9{253,405} | CCn1nncc1Cn1nnnc1N1CCCC2(CCCCC2)C1                  | 10 | 5  |
| 596 | 15{254} | 11{355} | 9{254,355} | CN(Cc1enn(C)c1)c1nnnn1CCC(C)(O)c1cccc1              | 0  | 0  |
| 597 | 15{254} | 11{355} | 9{254,355} | CN(Cc1enn(C)c1)c1nnnn1CCC(C)(O)c1cccc1              | 0  | 0  |
| 598 | 15{255} | 11{322} | 9{255,322} | COc1ccc(Cn2nnnc2N(C)C2CC2)c(OC)n1                   | 0  | 0  |
| 599 | 15{256} | 11{466} | 9{256,466} | CO[C@H](C)Cn1nnnc1N1CCCC2(C1)Oc1cccc<br>1C=C2       | 18 | 9  |
| 600 | 15{257} | 11{288} | 9{257,288} | CC(=O)N1CCCN(CC1)c1nnnn1C1CCC2(CCCC<br>2)CC1        | 23 | 11 |
| 601 | 15{258} | 11{322} | 9{258,322} | CN(C1CC1)c1nnnn1CC1CCC(F)(F)C1                      | 43 | 20 |
| 602 | 15{258} | 11{391} | 9{258,391} | CN(CC1CC1)c1nnnn1CC1CCC(F)(F)C1                     | 35 | 17 |
| 603 | 15{259} | 11{391} | 9{259,391} | COCC(C)(C)Cn1nnnc1N(C)CC1CC1                        | 10 | 5  |
| 604 | 15{259} | 11{337} | 9{259,337} | COCC(C)(C)Cn1nnnc1N(C)CC1CCOC1                      | 37 | 18 |
| 605 | 15{259} | 11{300} | 9{259,300} | COCC(C)(C)Cn1nnnc1N1CCCOCC1                         | 14 | 7  |
| 606 | 15{260} | 11{484} | 9{260,484} | CC1CCN(CC11CCCCC1)c1nnnn1[C@@H]1CC<br>N(C1)C(C)=O   | 22 | 11 |
| 607 | 15{260} | 11{485} | 9{260,485} | CC(=O)N1CC[C@H](C1)n1nnnc1N1CCCC2(C                 | 18 | 9  |

|     |         |         |            | CCCC2)CC1                                                |    |    |
|-----|---------|---------|------------|----------------------------------------------------------|----|----|
| 608 | 15{261} | 11{365} | 9{261,365} | CC1CC(CN1c1nnnn1C1CCN(C)C1=O)c1ccc(C)<br>cc1             | 0  | 0  |
| 609 | 15{261} | 11{327} | 9{261,327} | CN1CCC(C1=O)n1nnnc1N1CCCC1c1ccsc1                        | 0  | 0  |
| 610 | 15{261} | 11{302} | 9{261,302} | CN(CCOc1ccc(F)cc1)c1nnnn1C1CCN(C)C1=O                    | 0  | 0  |
| 611 | 15{262} | 11{319} | 9{262,319} | CC(Cn1nnnc1N(C)CC1COCCO1)Sc1ccccc1                       | 65 | 31 |
| 612 | 15{263} | 11{341} | 9{263,341} | CC(Cn1nnnc1N1CCCC1)Oc1ccccc1F                            | 73 | 36 |
| 613 | 15{264} | 11{319} | 9{264,319} | CC(Cn1nnnc1N(C)CC1COCCO1)Oc1ccc(C)c1                     | 0  | 0  |
| 614 | 15{265} | 11{319} | 9{265,319} | CC(Cn1nnnc1N(C)CC1COCCO1)Oc1ccccc1C                      | 55 | 28 |
| 615 | 15{266} | 11{486} | 9{266,486} | CC(C)(C)OC(=O)N1C2CCC1CN(C2)c1nnnn1C<br>CCC#C            | 8  | 4  |
| 616 | 15{266} | 11{487} | 9{266,487} | CC(C)(C)OC(=O)N1CC2CCC(C1)N2c1nnnn1C<br>CCC#C            | 13 | 6  |
| 617 | 15{266} | 11{488} | 9{266,488} | CC(C)(C)OC(=O)[1C@]12COC[1C@H]1CN(C2)<br>c1nnnn1CCCC#C   | 0  | 0  |
| 618 | 15{266} | 11{313} | 9{266,313} | CC(C)(C)OC(=O)N1C[C@H]2CN(C[C@H]2C1)<br>c1nnnn1CCCC#C    | 40 | 17 |
| 619 | 15{266} | 11{489} | 9{266,489} | CC(C)(C)OC(=O)NCC12CC(C1)CN2c1nnnn1C<br>CCC#C            | 0  | 0  |
| 620 | 15{267} | 11{490} | 9{267,490} | CC(O)C1CCN(CC1)c1nnnn1CC1(Cc2ccccc2)CC<br>1              | 62 | 31 |
| 621 | 15{268} | 11{356} | 9{268,356} | CN(CC1CCC1)c1nnnn1Cc1ccc(CC(N)=O)cc1                     | 30 | 16 |
| 622 | 15{268} | 11{333} | 9{268,333} | CC1(C)CN(CCS1)c1nnnn1Cc1ccc(CC(N)=O)cc1                  | 25 | 12 |
| 623 | 15{269} | 11{319} | 9{269,319} | CSCc1ccc(Cn2nnnc2N(C)CC2COCCO2)cc1                       | 45 | 18 |
| 624 | 15{270} | 11{485} | 9{270,485} | NC(=O)[C@H]1C[C@H](C1)n1nnnc1N1CCCC<br>2(CCCCC2)CC1      | 35 | 17 |
| 625 | 15{270} | 11{365} | 9{270,365} | CC1CC(CN1c1nnnn1[C@@H]1C[C@@H](C1)<br>C(N)=O)c1ccc(C)cc1 | 34 | 17 |

|     |         |         |            |                                                     |    |    |
|-----|---------|---------|------------|-----------------------------------------------------|----|----|
| 626 | 15{270} | 11{302} | 9{270,302} | CN(CCOc1ccc(F)cc1)c1nnnn1[C@@H]1C[C@@H](C1)C(N)=O   | 21 | 10 |
| 627 | 15{270} | 11{26}  | 9{270,26}  | NC(=O)[C@H]1C[C@H](C1)n1nnnc1N1CCc2c<br>c(Cl)ccc2C1 | 10 | 4  |
| 628 | 15{270} | 11{484} | 9{270,484} | CC1CCN(CC11CCCCC1)c1nnnn1[C@@H]1C[C@@H](C1)C(N)=O   | 0  | 0  |
| 629 | 15{271} | 11{288} | 9{271,288} | CC(=O)N1CCCN(CC1)c1nnnn1CC1CC2CCC1C<br>C2           | 30 | 16 |
| 630 | 15{271} | 11{395} | 9{271,395} | C(C1CC2CCC1CC2)n1nnnc1N1CCOC2(CCOC<br>2)C1          | 0  | 0  |
| 631 | 15{272} | 11{319} | 9{272,319} | CCSc1ccc(Cn2nnnc2N(C)CC2COCCO2)cc1                  | 66 | 33 |
| 632 | 15{273} | 11{356} | 9{273,356} | CN(CC1CCC1)c1nnnn1CCn1cc(Br)cn1                     | 57 | 27 |
| 633 | 15{274} | 11{328} | 9{274,328} | Clc1ccc2n(Cc3nnnc3N3CCOCC3)ccc2c1                   | 23 | 11 |
| 634 | 15{275} | 11{322} | 9{275,322} | CN(C1CC1)c1nnnn1Cc1ncc(Br)s1                        | 0  | 0  |
| 635 | 15{276} | 11{288} | 9{276,288} | CC(=O)N1CCCN(CC1)c1nnnn1CC1CCC2(CC2)<br>CC1         | 13 | 6  |
| 636 | 15{277} | 11{341} | 9{277,341} | FC(F)Oc1cccc(F)c1Cn1nnnc1N1CCCC1                    | 36 | 18 |
| 637 | 15{278} | 11{349} | 9{278,349} | C#CCC1CCCN(C1)c1nnnn1Cc1nnnn1C1CC1                  | 0  | 0  |
| 638 | 15{278} | 11{327} | 9{278,327} | C(c1nnnn1C1CC1)n1nnnc1N1CCCC1c1ccsc1                | 0  | 0  |
| 639 | 15{279} | 11{491} | 9{279,491} | CSC(C)Cn1nnnc1N1CCC(C1)N1CCCC1                      | 0  | 0  |
| 640 | 15{280} | 11{322} | 9{280,322} | CN(C1CC1)c1nnnn1CCn1cc(Br)cn1                       | 39 | 20 |
| 641 | 15{280} | 11{391} | 9{280,391} | CN(CC1CC1)c1nnnn1CCn1cc(Br)cn1                      | 80 | 38 |
| 642 | 15{281} | 11{345} | 9{281,345} | C(c1nc2CCOCc2s1)n1nnnc1N1CCCCCCC1                   | 27 | 13 |
| 643 | 15{282} | 11{350} | 9{282,350} | CN(CCC=C)c1nnnn1C1CC(C1)OCc1cccc1                   | 33 | 16 |
| 644 | 15{283} | 11{338} | 9{283,338} | CCC1CN(CC(CC)O1)c1nnnn1C1CCN(C1)C(=O)<br>)CC        | 38 | 18 |
| 645 | 15{284} | 11{355} | 9{284,355} | COCCC1(Cn2nnnc2N(C)Cc2cnn(C)c2)CCCC1                | 42 | 19 |

|     |         |         |            |                                            |    |    |
|-----|---------|---------|------------|--------------------------------------------|----|----|
| 646 | 15{285} | 11{355} | 9{285,355} | CCOCCC1(Cn2nnnc2N(C)Cc2cnn(C)c2)CCCC1      | 33 | 16 |
| 647 | 15{286} | 11{288} | 9{286,288} | CCC1(Cn2nnnc2N2CCCN(CC2)C(C)=O)CCCC        | 29 | 14 |
| 648 | 15{287} | 11{492} | 9{287,492} | 1<br>CN(CC(C)(O)c1cccc1)c1nnnn1CCc1cnn1C   | 0  | 0  |
| 649 | 15{287} | 11{297} | 9{287,297} | Cn1ncec1CCn1nnnc1N1CCC(CC1)C1(C)OCCO       | 20 | 9  |
| 650 | 15{287} | 11{492} | 9{287,492} | 1<br>CN(CC(C)(O)c1cccc1)c1nnnn1CCc1cnn1C   | 20 | 11 |
| 651 | 15{287} | 11{298} | 9{287,298} | Cn1ncec1CCn1nnnc1N1CCCC(C1)C1(C)OCCO       | 21 | 9  |
| 652 | 15{288} | 11{319} | 9{288,319} | 1<br>CN(CC1COCCO1)c1nnnn1C1CCOC(C1)C(C)(C  | 38 | 17 |
| 653 | 15{289} | 11{338} | 9{289,338} | )C<br>CCC1CN(CC(CC)O1)c1nnnn1C1CCOC(C1)C(C | 26 | 13 |
| 654 | 15{290} | 11{338} | 9{290,338} | )C<br>CCC1CN(CC(CC)O1)c1nnnn1CCCOC1CCOC1   | 29 | 15 |
| 655 | 15{291} | 11{328} | 9{291,328} | CC(C)c1esc(Cn2nnnc2N2CCOCC2)n1             | 0  | 0  |
| 656 | 15{292} | 11{288} | 9{292,288} | CC(=O)N1CCCN(CC1)c1nnnn1CCOCC1CCCC         | 53 | 26 |
| 657 | 15{293} | 11{297} | 9{293,297} | 1<br>CC1(OCCO1)C1CCN(CC1)c1nnnn1CCc1ccco   | 31 | 14 |
| 658 | 15{293} | 11{298} | 9{293,298} | 1<br>CC1(OCCO1)C1CCCN(C1)c1nnnn1CCc1ccco   | 22 | 12 |
| 659 | 15{294} | 11{322} | 9{294,322} | 1<br>CN(C1CC1)c1nnnn1Cc1cnn(CC(F)(F)F)c1   | 60 | 29 |
| 660 | 15{294} | 11{356} | 9{294,356} | CN(CC1CCC1)c1nnnn1Cc1cnn(CC(F)(F)F)c1      | 49 | 24 |
| 661 | 15{295} | 11{339} | 9{295,339} | CNC(=O)C(C)(C)Cn1nnnc1N(C)Cc1cccc(F)c1     | 0  | 0  |
| 662 | 15{296} | 11{339} | 9{296,339} | CCNC(=O)C(C)(C)Cn1nnnc1N(C)Cc1cccc(F)c1    | 30 | 15 |
| 663 | 15{296} | 11{338} | 9{296,338} | CCNC(=O)C(C)(C)Cn1nnnc1N1CC(CC)OC(CC)      | 0  | 0  |
| 664 | 15{297} | 11{338} | 9{297,338} | C1<br>CCC1CN(CC(CC)O1)c1nnnn1CC(C)c1nccs1  | 0  | 0  |

|     |         |         |            |                                       |    |    |
|-----|---------|---------|------------|---------------------------------------|----|----|
| 665 | 15{298} | 11{303} | 9{298,303} | CCN(C)C(=O)Cn1nnnc1N1CCCC(C)C1C       | 46 | 21 |
| 666 | 15{298} | 11{417} | 9{298,417} | CCN(C)C(=O)Cn1nnnc1N1CCc2cccc(OC)c2C1 | 11 | 6  |
| 667 | 15{299} | 11{338} | 9{299,338} | CCC1CN(CC(CC)O1)c1nnnn1C1CC(OC)C1(C)  | 26 | 13 |
| 668 | 15{299} | 11{327} | 9{299,327} | COC1CC(n2nnnc2N2CCCC2c2ccsc2)C1(C)C   | 56 | 28 |
| 669 | 15{299} | 11{349} | 9{299,349} | COC1CC(n2nnnc2N2CCCC(CC#C)C2)C1(C)C   | 0  | 0  |
| 670 | 15{300} | 11{493} | 9{300,493} | CC1CC2CCC(C1)N2c1nnnn1C1CN(C(=O)C1)C  | 9  | 4  |
| 671 | 15{301} | 11{321} | 9{301,321} | CCSC1CCCC(C1)n1nnnc1N1CCC(CO)CC1      | 0  | 0  |
| 672 | 15{302} | 11{355} | 9{302,355} | CC(C)C1OCCCC1Cn1nnnc1N(C)Cc1cnn(C)c1  | 24 | 11 |
| 673 | 15{303} | 11{355} | 9{303,355} | CCOCCC1(Cn2nnnc2N(C)Cc2cnn(C)c2)CCC1  | 28 | 14 |
| 674 | 15{304} | 11{349} | 9{304,349} | COCCC1(Cn2nnnc2N2CCCC(CC#C)C2)CCC1    | 0  | 0  |
| 675 | 15{304} | 11{288} | 9{304,288} | COCCC1(Cn2nnnc2N2CCCN(CC2)C(C)=O)CC   | 52 | 26 |
| 676 | 15{305} | 11{288} | 9{305,288} | CC(C)CC1(Cn2nnnc2N2CCCN(CC2)C(C)=O)C  | 0  | 0  |
| 677 | 15{306} | 11{494} | 9{306,494} | COCC1CN(CCO1)c1nnnn1Cc1csc1C          | 0  | 0  |
| 678 | 15{306} | 11{147} | 9{306,147} | Cc1csc1Cn1nnnc1N1CCC(C1)n1cc(Cl)cn1   | 47 | 23 |
| 679 | 15{306} | 11{323} | 9{306,323} | Cc1csc1Cn1nnnc1N1Cc2cccc2NC(=O)C1     | 0  | 0  |
| 680 | 15{306} | 11{390} | 9{306,390} | Cc1csc1Cn1nnnc1N1CCN(CC1)S(C)(=O)=O   | 0  | 0  |
| 681 | 15{306} | 11{495} | 9{306,495} | CC(=O)NCC1CN(CCO1)c1nnnn1Cc1csc1C     | 28 | 15 |
| 682 | 15{306} | 11{176} | 9{306,176} | CN(Cc1enc(C)s1)c1nnnn1Cc1csc1C        | 0  | 0  |
| 683 | 15{306} | 11{496} | 9{306,496} | CC(C#C)N(C)c1nnnn1Cc1csc1C            | 0  | 0  |
| 684 | 15{306} | 11{178} | 9{306,178} | CN(Cc1ccoc1)c1nnnn1Cc1csc1C           | 19 | 10 |

|     |         |         |            |                                                     |    |    |
|-----|---------|---------|------------|-----------------------------------------------------|----|----|
| 685 | 15{306} | 11{108} | 9{306,108} | <chem>Cc1cscclCn1nnnc1N1CCC(CC1)N1CCCC1=O</chem>    | 0  | 0  |
| 686 | 15{306} | 11{177} | 9{306,177} | <chem>CC(C)C(=O)N1CCCN(CC1)c1nnnn1Cc1cscclC</chem>  | 0  | 0  |
| 687 | 15{306} | 11{261} | 9{306,261} | <chem>Cc1cscclCn1nnnc1N1CCC(CC1)C1CCCO1</chem>      | 68 | 33 |
| 688 | 15{306} | 11{168} | 9{306,168} | <chem>Cc1cscclCn1nnnc1N1CCOC(C1)c1ccco1</chem>      | 31 | 16 |
| 689 | 15{306} | 11{497} | 9{306,497} | <chem>Cc1cscclCn1nnnc1N1CCN2C(C1)C(=O)NC2=O</chem>  | 0  | 0  |
| 690 | 15{306} | 11{19}  | 9{306,19}  | <chem>COC1(CCN(C1)c1nnnn1Cc1cscclC)C(F)(F)F</chem>  | 0  | 0  |
| 691 | 15{306} | 11{375} | 9{306,375} | <chem>Cc1cscclCn1nnnc1N1CCN(CC1)c1ncccn1</chem>     | 38 | 18 |
| 692 | 15{307} | 11{288} | 9{307,288} | <chem>CCCC1(Cn2nnnc2N2CCCN(CC2)C(C)=O)CCC</chem>    | 22 | 11 |
| 693 | 15{308} | 11{424} | 9{308,424} | <chem>CCC(OCCn1nnnc1N1CCCC(O)C1)c1ccccc1</chem>     | 0  | 0  |
| 694 | 15{308} | 11{423} | 9{308,423} | <chem>CCC(OCCn1nnnc1N1CCNC(=O)C1)c1ccccc1</chem>    | 0  | 0  |
| 695 | 15{308} | 11{321} | 9{308,321} | <chem>CCC(OCCn1nnnc1N1CCC(CO)CC1)c1ccccc1</chem>    | 21 | 9  |
| 696 | 15{308} | 11{328} | 9{308,328} | <chem>CCC(OCCn1nnnc1N1CCOCC1)c1ccccc1</chem>        | 28 | 14 |
| 697 | 15{309} | 11{338} | 9{309,338} | <chem>CCC1CN(CC(CC)O1)c1nnnn1CC1(CCOC)CC1</chem>    | 0  | 0  |
| 698 | 15{310} | 11{338} | 9{310,338} | <chem>CCOCCC1(Cn2nnnc2N2CC(CC)OC(CC)C2)CC</chem>    | 45 | 23 |
| 699 | 15{311} | 11{355} | 9{311,355} | <chem>COC(Cn1nnnc1N(C)Cc1cnn(C)c1)C1CCCCC1</chem>   | 0  | 0  |
| 700 | 15{312} | 11{375} | 9{312,375} | <chem>COC1(Cn2nnnc2N2CCN(CC2)c2ncccn2)CCC1</chem>   | 25 | 12 |
| 701 | 15{312} | 11{338} | 9{312,338} | <chem>CCC1CN(CC(CC)O1)c1nnnn1CC1(CCC1)OC</chem>     | 27 | 13 |
| 702 | 15{312} | 11{287} | 9{312,287} | <chem>COC1(Cn2nnnc2N2CCN(CC2)C(=O)c2ccco2)C</chem>  | 0  | 0  |
| 703 | 15{312} | 11{460} | 9{312,460} | <chem>COC1(Cn2nnnc2N2CCN(CC2)c2ccc(F)cc2)CCC</chem> | 28 | 14 |
| 704 | 15{312} | 11{498} | 9{312,498} | <chem>COC1(Cn2nnnc2N2CCN(CC2)c2ccccc2F)CCC1</chem>  | 0  | 0  |



|     |         |         |            |                                                     |     |    |
|-----|---------|---------|------------|-----------------------------------------------------|-----|----|
| 705 | 15{313} | 11{338} | 9{313,338} | CCC1CN(CC(CC)O1)c1nnnn1CC(C)(C)C(C)(C)<br>O         | 0   | 0  |
| 706 | 15{314} | 11{333} | 9{314,333} | CCc1nn(C)c(CC)c1Cn1nnnc1N1CCSC(C)(C)C1              | 0   | 0  |
| 707 | 15{315} | 11{337} | 9{315,337} | CSc1cccc(F)c1Cn1nnnc1N(C)CC1CCOC1                   | 23  | 11 |
| 708 | 15{316} | 11{338} | 9{316,338} | CCC1CN(CC(CC)O1)c1nnnn1CCC1CC2CCC1<br>O2            | 17  | 8  |
| 709 | 15{317} | 11{288} | 9{317,288} | CCCC1(Cn2nnnc2N2CCCN(CC2)C(C)=O)CC1                 | 27  | 13 |
| 710 | 15{317} | 11{304} | 9{317,304} | CCCC1(Cn2nnnc2N2CCCC(CNC(=O)C(C)C)C2<br>)CC1        | 30  | 14 |
| 711 | 15{318} | 11{304} | 9{318,304} | CC(C)C(=O)NCC1CCCN(C1)c1nnnn1C1CCC(C<br>)C1         | 38  | 18 |
| 712 | 15{319} | 11{395} | 9{319,395} | CC(C)(Cn1nnnc1N1CCOC2(CCOC2)C1)C1CC<br>CC1          | 16  | 7  |
| 713 | 15{319} | 11{288} | 9{319,288} | CC(=O)N1CCCN(CC1)c1nnnn1CC(C)(C)C1CC<br>CC1         | 38  | 17 |
| 714 | 15{320} | 11{365} | 9{320,365} | CO[C@H]1C[C@@H](C1)n1nnnc1N1CC(CC1C<br>)c1ccc(C)cc1 | 60  | 28 |
| 715 | 15{320} | 11{327} | 9{320,327} | CO[C@H]1C[C@@H](C1)n1nnnc1N1CCCC1c1<br>ccsc1        | 189 | 89 |
| 716 | 15{320} | 11{302} | 9{320,302} | CO[C@H]1C[C@@H](C1)n1nnnc1N(C)CCOc1<br>ccc(F)cc1    | 0   | 0  |
| 717 | 15{321} | 11{349} | 9{321,349} | CCC1(Cn2nnnc2N2CCCC(CC#C)C2)CCOCC1                  | 10  | 5  |
| 718 | 15{321} | 11{288} | 9{321,288} | CCC1(Cn2nnnc2N2CCCN(CC2)C(C)=O)CCOC<br>C1           | 0   | 0  |
| 719 | 15{322} | 11{302} | 9{322,302} | CN(CCOc1ccc(F)cc1)c1nnnn1C1CC(C1)C(N)=<br>O         | 30  | 15 |
| 720 | 15{323} | 11{349} | 9{323,349} | COCC1CC(C1)n1nnnc1N1CCCC(CC#C)C1                    | 15  | 7  |
| 721 | 15{323} | 11{327} | 9{323,327} | COCC1CC(C1)n1nnnc1N1CCCC1c1ccsc1                    | 68  | 34 |
| 722 | 15{323} | 11{302} | 9{323,302} | COCC1CC(C1)n1nnnc1N(C)CCOc1ccc(F)cc1                | 16  | 8  |
| 723 | 15{324} | 11{349} | 9{324,349} | CS(=O)(=O)C1(Cn2nnnc2N2CCCC(CC#C)C2)C<br>C1         | 13  | 6  |

|     |         |         |            |                                                       |    |    |
|-----|---------|---------|------------|-------------------------------------------------------|----|----|
| 724 | 15{324} | 11{350} | 9{324,350} | CN(CCC=C)c1nnnn1CC1(CC1)S(C)(=O)=O                    | 22 | 11 |
| 725 | 15{325} | 11{338} | 9{325,338} | CCC1CN(CC(CC)O1)c1nnnn1CC1CCOC(C)C1                   | 18 | 9  |
| 726 | 15{326} | 11{179} | 9{326,179} | CC1(Cn2nnnc2N2C[C@H]3[C@H](CO)[C@H]<br>3C2)CCc2cccc12 | 24 | 12 |
| 727 | 15{327} | 11{304} | 9{327,304} | CC(C)C(=O)NCC1CCCN(C1)c1nnnn1C1CC2(C<br>CC2)C1        | 30 | 15 |
| 728 | 15{327} | 11{472} | 9{327,472} | CC(C)(C)OC(=O)N[C@@H]1CCN(C1)c1nnnn1<br>C1CC2(CCC2)C1 | 34 | 18 |
| 729 | 15{328} | 11{302} | 9{328,302} | CCO[C@H]1C[C@H](C1)n1nnnc1N(C)CCOc1c<br>cc(F)cc1      | 0  | 0  |
| 730 | 15{328} | 11{327} | 9{328,327} | CCO[C@H]1C[C@H](C1)n1nnnc1N1CCCC1c1<br>ccsc1          | 34 | 16 |
| 731 | 15{328} | 11{349} | 9{328,349} | CCO[C@H]1C[C@H](C1)n1nnnc1N1CCCC(CC<br>#C)C1          | 29 | 15 |
| 732 | 15{329} | 11{302} | 9{329,302} | CCO[C@H]1C[C@@H](C1)n1nnnc1N(C)CCOc<br>1ccc(F)cc1     | 18 | 9  |
| 733 | 15{329} | 11{327} | 9{329,327} | CCO[C@H]1C[C@@H](C1)n1nnnc1N1CCCC1<br>c1ccsc1         | 62 | 33 |
| 734 | 15{329} | 11{349} | 9{329,349} | CCO[C@H]1C[C@@H](C1)n1nnnc1N1CCCC(<br>CC#C)C1         | 33 | 15 |
| 735 | 15{330} | 11{499} | 9{330,499} | O=S1(=O)CCCCC1Cn1nnnc1N1CCCC2(CC2)C<br>C1             | 25 | 13 |
| 736 | 15{330} | 11{493} | 9{330,493} | CC1CC2CCC(C1)N2c1nnnn1CC1CCCS1(=O)<br>=O              | 8  | 4  |
| 737 | 15{331} | 11{300} | 9{331,300} | FC(F)(F)c1cc(Cn2nnnc2N2CCCOCC2)es1                    | 55 | 27 |
| 738 | 15{331} | 11{337} | 9{331,337} | CN(CC1CCOC1)c1nnnn1Cc1csc(c1)C(F)(F)F                 | 25 | 13 |
| 739 | 15{332} | 11{500} | 9{332,500} | CON1CCC(CC1)n1nnnc1N1CCCC(C1)c1cc2ccc<br>cc2[nH]1     | 0  | 0  |
| 740 | 15{333} | 11{501} | 9{333,501} | CCN(CC(C)=C)c1nnnn1C1COC2(CCC2)C1                     | 35 | 18 |
| 741 | 15{333} | 11{302} | 9{333,302} | CN(CCOc1ccc(F)cc1)c1nnnn1C1COC2(CCC2)C                | 47 | 24 |

1

|     |         |         |            |                                                                 |    |    |
|-----|---------|---------|------------|-----------------------------------------------------------------|----|----|
| 742 | 15{334} | 11{391} | 9{334,391} | CCS(=O)(=O)c1ccc(Cn2nnnc2N(C)CC2CC2)cc1                         | 6  | 3  |
| 743 | 15{335} | 11{430} | 9{335,430} | CCOC(=O)[1C@@H]1[1C@@H]2CCN(C[1C@H]12)c1nnnn1[C@@H]1CCO[C@@H]1C | 31 | 15 |
| 744 | 15{335} | 11{436} | 9{335,436} | COC(=O)[1C@]12CCC[1C@H]1N(CC2)c1nnnn1[C@@H]1CCO[C@@H]1C         | 0  | 0  |
| 745 | 15{335} | 11{359} | 9{335,359} | C[C@H]1OCC[C@H]1n1nnnc1N1C[C@@H]2C[C@H](C1)c1ccc(=O)n1C2        | 12 | 6  |
| 746 | 15{335} | 11{419} | 9{335,419} | C[C@H]1OCC[C@H]1n1nnnc1N1C2CCC1CC1(CC1(F)F)C2                   | 0  | 0  |
| 747 | 15{335} | 11{502} | 9{335,502} | C[C@H]1OCC[C@H]1n1nnnc1N1CCC2(C1)Oc1cccc1O2                     | 0  | 0  |
| 748 | 15{335} | 11{371} | 9{335,371} | C[C@H]1OCC[C@H]1n1nnnc1N1CCOC2(CCc3cccc23)C1                    | 0  | 0  |
| 749 | 15{335} | 11{408} | 9{335,408} | C[C@H]1OCC[C@H]1n1nnnc1N1CCCC2(CCC2)C1                          | 21 | 10 |
| 750 | 15{335} | 11{404} | 9{335,404} | COC(=O)[1C@]12CN(C[1C@H]1CCCC2)c1nnnn1[C@@H]1CCO[C@@H]1C        | 13 | 6  |
| 751 | 15{335} | 11{406} | 9{335,406} | C[C@H]1OCC[C@H]1n1nnnc1N1CCC(C)C2(CCC2)C1                       | 18 | 9  |
| 752 | 15{335} | 11{413} | 9{335,413} | C[C@H]1OCC[C@H]1n1nnnc1N1CC(C)OC2(CCCC2)C1                      | 23 | 11 |
| 753 | 15{335} | 11{407} | 9{335,407} | C[C@H]1OCC[C@H]1n1nnnc1N1CCC2(C1)CCC2                           | 40 | 19 |
| 754 | 15{335} | 11{457} | 9{335,457} | CCc1ncc2C3CCC(Cc2n1)N3c1nnnn1[C@@H]1CCO[C@@H]1C                 | 0  | 0  |
| 755 | 15{335} | 11{503} | 9{335,503} | C[C@H]1OCC[C@H]1n1nnnc1N1CCCN2C(Cc3cccc23)C1                    | 0  | 0  |
| 756 | 15{335} | 11{421} | 9{335,421} | C[C@H]1OCC[C@H]1n1nnnc1N1CCC2(C1)OCc1cccc21                     | 7  | 3  |
| 757 | 15{335} | 11{467} | 9{335,467} | C[C@H]1OCC[C@H]1n1nnnc1N1C2CCC1CC(CC(F)(F)F)C2                  | 0  | 0  |
| 758 | 15{335} | 11{402} | 9{335,402} | C[C@H]1OCC[C@H]1n1nnnc1N1CC(C)OC2(CCCCC2)C1                     | 0  | 0  |
| 759 | 15{335} | 11{104} | 9{335,104} | C[C@H]1OCC[C@H]1n1nnnc1N1CCOCC2(CC                              | 0  | 0  |

|     |         |         |            | CC2)C1                                                 |    |    |
|-----|---------|---------|------------|--------------------------------------------------------|----|----|
| 760 | 15{335} | 11{409} | 9{335,409} | C[C@H]1OCC[C@H]1n1nnnc1N1CCSC2(CCC<br>CC2)C1           | 0  | 0  |
| 761 | 15{335} | 11{412} | 9{335,412} | CON(CC1CC2CCC1C2)c1nnnn1[C@@H]1CCO<br>[C@@H]1C         | 0  | 0  |
| 762 | 15{335} | 11{282} | 9{335,282} | C[C@H]1OCC[C@H]1n1nnnc1N1CCN(C(C)=O<br>)C2(CCCCC2)C1   | 17 | 8  |
| 763 | 15{336} | 11{288} | 9{336,288} | CCC[1C@@H]1C[1C@H]1n1nnnc1N1CCCN(C<br>C1)C(C)=O        | 33 | 16 |
| 764 | 15{336} | 11{304} | 9{336,304} | CCC[1C@@H]1C[1C@H]1n1nnnc1N1CCCC(C<br>NC(=O)C(C)C)C1   | 17 | 8  |
| 765 | 15{337} | 11{322} | 9{337,322} | CN(C1CC1)c1nnnn1C1CCOC(C1)c1ccnn1C                     | 25 | 12 |
| 766 | 15{337} | 11{356} | 9{337,356} | CN(CC1CCC1)c1nnnn1C1CCOC(C1)c1ccnn1C                   | 30 | 16 |
| 767 | 15{338} | 11{322} | 9{338,322} | CN(C1CC1)c1nnnn1C[C@@H]1CCCN(C)[C@<br>H]1c1ccnn1C      | 0  | 0  |
| 768 | 15{338} | 11{391} | 9{338,391} | CN(CC1CC1)c1nnnn1C[C@@H]1CCCN(C)[C<br>@H]1c1ccnn1C     | 33 | 16 |
| 769 | 15{339} | 11{288} | 9{339,288} | CC(=O)N1CCCN(CC1)c1nnnn1CC(C1CCC1)C1<br>CCC1           | 21 | 10 |
| 770 | 15{339} | 11{395} | 9{339,395} | C(C(C1CCC1)C1CCC1)n1nnnc1N1CCOC2(CC<br>OC2)C1          | 32 | 15 |
| 771 | 15{340} | 11{504} | 9{340,504} | O=C1CN(CCN1C1CC1)c1nnnn1CCC1CCC2(C<br>CC2)O1           | 11 | 6  |
| 772 | 15{340} | 11{319} | 9{340,319} | CN(CC1COCCO1)c1nnnn1CCC1CCC2(CCC2)<br>O1               | 53 | 25 |
| 773 | 15{341} | 11{346} | 9{341,346} | CCN(C)c1nnnn1Cc1nc(n2CCCCc12)C(F)(F)F                  | 70 | 34 |
| 774 | 15{342} | 11{288} | 9{342,288} | CC(=O)N1CCCN(CC1)c1nnnn1CC(C)(C)C1CC<br>C1             | 0  | 0  |
| 775 | 15{343} | 11{288} | 9{343,288} | CC(=O)N1CCCN(CC1)c1nnnn1CC1(C)CC1(Cl)<br>Cl            | 0  | 0  |
| 776 | 15{344} | 11{304} | 9{344,304} | CC(C)[1C@@H]1C[1C@H]1n1nnnc1N1CCCC(<br>CNC(=O)C(C)C)C1 | 36 | 17 |

|     |         |         |            |                                                         |    |    |
|-----|---------|---------|------------|---------------------------------------------------------|----|----|
| 777 | 15{345} | 11{304} | 9{345,304} | CC(C)C[1C@@H]1C[1C@H]1n1nnnc1N1CCC<br>C(CNC(=O)C(C)C)C1 | 34 | 17 |
| 778 | 15{346} | 11{391} | 9{346,391} | CN(CC1CC1)c1nnnn1C[1C@@H]1CCO[1C@H]<br>]1c1c(C)nn(C)c1C | 32 | 17 |
| 779 | 15{347} | 11{327} | 9{347,327} | CC(C)(C)O[C@H]1C[C@H](C1)n1nnnc1N1CC<br>CC1c1ccsc1      | 0  | 0  |
| 780 | 15{347} | 11{349} | 9{347,349} | CC(C)(C)O[C@H]1C[C@H](C1)n1nnnc1N1CC<br>CC(CC#C)C1      | 0  | 0  |
| 781 | 15{348} | 11{349} | 9{348,349} | COC(=O)CC1CC(C1)n1nnnc1N1CCCC(CC#C)<br>C1               | 14 | 7  |
| 782 | 15{348} | 11{327} | 9{348,327} | COC(=O)CC1CC(C1)n1nnnc1N1CCCC1c1ccsc1                   | 31 | 16 |
| 783 | 15{349} | 11{302} | 9{349,302} | CCN1CCC(C1=O)n1nnnc1N(C)CCOc1ccc(F)cc<br>1              | 0  | 0  |
| 784 | 15{350} | 11{302} | 9{350,302} | CN(CCOc1ccc(F)cc1)c1nnnn1[C@H]1C[C@@<br>H](C1)C(N)=O    | 13 | 6  |
| 785 | 15{351} | 11{338} | 9{351,338} | CCC1CN(CC(CC)O1)c1nnnn1CCC1(COC)CC1                     | 33 | 16 |
| 786 | 15{352} | 11{338} | 9{352,338} | CCC1CN(CC(CC)O1)c1nnnn1CCCC1(O)CCC1                     | 38 | 20 |
| 787 | 15{353} | 11{501} | 9{353,501} | CCN(CC(C)=C)c1nnnn1CCN1CC2CCCCN2C1=<br>O                | 0  | 0  |
| 788 | 15{354} | 11{327} | 9{354,327} | C(C1SCCS1)n1nnnc1N1CCCC1c1ccsc1                         | 8  | 4  |
| 789 | 15{354} | 11{349} | 9{354,349} | C#CCC1CCCN(C1)c1nnnn1CC1SCCS1                           | 0  | 0  |
| 790 | 15{355} | 11{297} | 9{355,297} | CC1(OCCO1)C1CCN(CC1)c1nnnn1C1COC(C1)<br>C1CC1           | 37 | 17 |
| 791 | 15{355} | 11{298} | 9{355,298} | CC1(OCCO1)C1CCCN(C1)c1nnnn1C1COC(C1)<br>C1CC1           | 8  | 4  |
| 792 | 15{356} | 11{350} | 9{356,350} | CN(CCC=C)c1nnnn1C1CCN(C2CCCC2)C1=O                      | 0  | 0  |
| 793 | 15{357} | 11{349} | 9{357,349} | CO[C@@H]1C[C@H](Cn2nnnc2N2CCCC(CC#<br>C)C2)C1           | 60 | 28 |
| 794 | 15{357} | 11{327} | 9{357,327} | CO[C@@H]1C[C@H](Cn2nnnc2N2CCCC2c2cc<br>sc2)C1           | 44 | 22 |
| 795 | 15{358} | 11{349} | 9{358,349} | O=C1C(CCN1C1CCC1)n1nnnc1N1CCCC(CC#                      | 0  | 0  |

|     |         |         |            | C)C1                                           |    |    |
|-----|---------|---------|------------|------------------------------------------------|----|----|
| 796 | 15{358} | 11{350} | 9{358,350} | CN(CCC=C)c1nnnn1C1CCN(C2CCC2)C1=O              | 0  | 0  |
| 797 | 15{359} | 11{505} | 9{359,505} | CC1CC2(CCC(Cn3nnnc3N3CC(C)CC(C)C3)O2)<br>CO1   | 34 | 16 |
| 798 | 15{359} | 11{465} | 9{359,465} | CC1CC2(CCC(Cn3nnnc3N3CCC(C)C(C)C3)O2)<br>CO1   | 22 | 11 |
| 799 | 15{359} | 11{501} | 9{359,501} | CCN(CC(C)=C)c1nnnn1CC1CCC2(COC(C)C2)<br>O1     | 21 | 10 |
| 800 | 15{359} | 11{340} | 9{359,340} | CC1CC2(CCC(Cn3nnnc3N3CCCCC3)O2)CO1             | 73 | 34 |
| 801 | 15{359} | 11{480} | 9{359,480} | CC1CC2(CCC(Cn3nnnc3N3CCC(C)CC3)O2)C<br>O1      | 17 | 8  |
| 802 | 15{359} | 11{479} | 9{359,479} | CC1CC2(CCC(Cn3nnnc3N3CCCC(C)C3)O2)C<br>O1      | 26 | 13 |
| 803 | 15{360} | 11{506} | 9{360,506} | CN(CC=C)c1nnnn1CC1(C)CCOC2(CCC2)C1             | 27 | 14 |
| 804 | 15{360} | 11{473} | 9{360,473} | CCO[C@H]1CCN(C1)c1nnnn1CC1(C)CCOC2(<br>CCC2)C1 | 56 | 26 |
| 805 | 15{361} | 11{350} | 9{361,350} | CN(CCC=C)c1nnnn1C[1C@@H]1CCO[1C@H]<br>1c1cccc1 | 22 | 11 |
| 806 | 15{362} | 11{501} | 9{362,501} | CCN(CC(C)=C)c1nnnn1CC12COCCN1C(=O)C<br>OC2     | 9  | 5  |
| 807 | 15{363} | 11{501} | 9{363,501} | CCN(CC(C)=C)c1nnnn1CC1CC2(CO1)CCOCC<br>2       | 16 | 8  |
| 808 | 15{364} | 11{501} | 9{364,501} | CCN(CC(C)=C)c1nnnn1CC1CC2CCC(C1)S2(=<br>O)=O   | 43 | 21 |
| 809 | 15{365} | 11{501} | 9{365,501} | CCN(CC(C)=C)c1nnnn1CC1CCC2(CCOCC2)C<br>O1      | 24 | 12 |
| 810 | 15{366} | 11{501} | 9{366,501} | CCN(CC(C)=C)c1nnnn1CCC1CCC2(CCOCC2)<br>CO1     | 37 | 18 |
| 811 | 15{367} | 11{288} | 9{367,288} | CC(=O)N1CCCN(CC1)c1nnnn1CCC1CCCC1(F)<br>F      | 0  | 0  |
| 812 | 15{368} | 11{504} | 9{368,504} | O=C1CN(CCN1C1CC1)c1nnnn1CC1CCC2(CC<br>C2)CO1   | 0  | 0  |

|     |         |         |            |                                                                   |    |    |
|-----|---------|---------|------------|-------------------------------------------------------------------|----|----|
| 813 | 15{369} | 11{349} | 9{369,349} | NC(=O)CC1CC(C1)n1nnnc1N1CCCC(CC#C)C1                              | 26 | 13 |
| 814 | 15{369} | 11{327} | 9{369,327} | NC(=O)CC1CC(C1)n1nnnc1N1CCCC1c1ccsc1                              | 38 | 20 |
| 815 | 15{370} | 11{504} | 9{370,504} | O=C1CN(CCN1C1CC1)c1nnnn1CC1CC2CCC(C1)S2                           | 0  | 0  |
| 816 | 15{370} | 11{507} | 9{370,507} | OC1(CCN(C1)c1nnnn1CC1CC2CCC(C1)S2)C(F)F                           | 24 | 11 |
| 817 | 15{371} | 11{350} | 9{371,350} | COC1(Cn2nnnc2N(C)CCC=C)CCS(=O)(=O)C1                              | 9  | 4  |
| 818 | 15{372} | 11{325} | 9{372,325} | O=c1[nH]ncn1C1CCN(CC1)c1nnnn1CC12CC1C CCC2                        | 32 | 15 |
| 819 | 15{373} | 11{349} | 9{373,349} | FC(F)(F)C1CCC(Cn2nnnc2N2CCCC(CC#C)C2)O1                           | 5  | 2  |
| 820 | 15{373} | 11{350} | 9{373,350} | CN(CCC=C)c1nnnn1CC1CCC(O1)C(F)(F)F                                | 15 | 7  |
| 821 | 15{374} | 11{508} | 9{374,508} | FC1(F)[1C@@H](Cn2nnnc2N2CCC3(COC3)C2)[1C@@H]1c1cccc1              | 0  | 0  |
| 822 | 15{374} | 11{509} | 9{374,509} | FC1(F)[1C@@H](Cn2nnnc2N2C3CCC2CC3)[1C@@H]1c1cccc1                 | 0  | 0  |
| 823 | 15{374} | 11{179} | 9{374,179} | OC[C@H]1[C@@H]2CN(C[C@H]12)c1nnnn1C[1C@@H]1[1C@@H](c2cccc2)C1(F)F | 0  | 0  |
| 824 | 15{374} | 11{510} | 9{374,510} | FC1(F)[1C@@H](Cn2nnnc2N2CC3CC3C2)[1C@@H]1c1cccc1                  | 0  | 0  |
| 825 | 15{375} | 11{511} | 9{375,511} | CN(C)C(=O)C1CCN(C1)c1nnnn1[1C@@H]1[1C@@H]2Cc3cccc3[1C@@H]12       | 71 | 36 |
| 826 | 15{375} | 11{504} | 9{375,504} | O=C1CN(CCN1C1CC1)c1nnnn1[1C@@H]1[1C@@H]2Cc3cccc3[1C@@H]12         | 0  | 0  |
| 827 | 15{376} | 11{504} | 9{376,504} | O=C1CN(CCN1C1CC1)c1nnnn1CC1CCCC2(CC2)O1                           | 0  | 0  |
| 828 | 15{377} | 11{501} | 9{377,501} | CCN(CC(C)=C)c1nnnn1CC1CCC2(CCOCC2)O1                              | 17 | 8  |
| 829 | 15{378} | 11{511} | 9{378,511} | CN(C)C(=O)C1CCN(C1)c1nnnn1C[1C@]12C[1C@H]1CCC2                    | 26 | 13 |
| 830 | 15{378} | 11{472} | 9{378,472} | CC(C)(C)OC(=O)N[C@@H]1CCN(C1)c1nnnn1C[1C@]12C[1C@H]1CCC2          | 21 | 11 |

<sup>1</sup>H NMR spectrum of the compound **8**{2,8}.

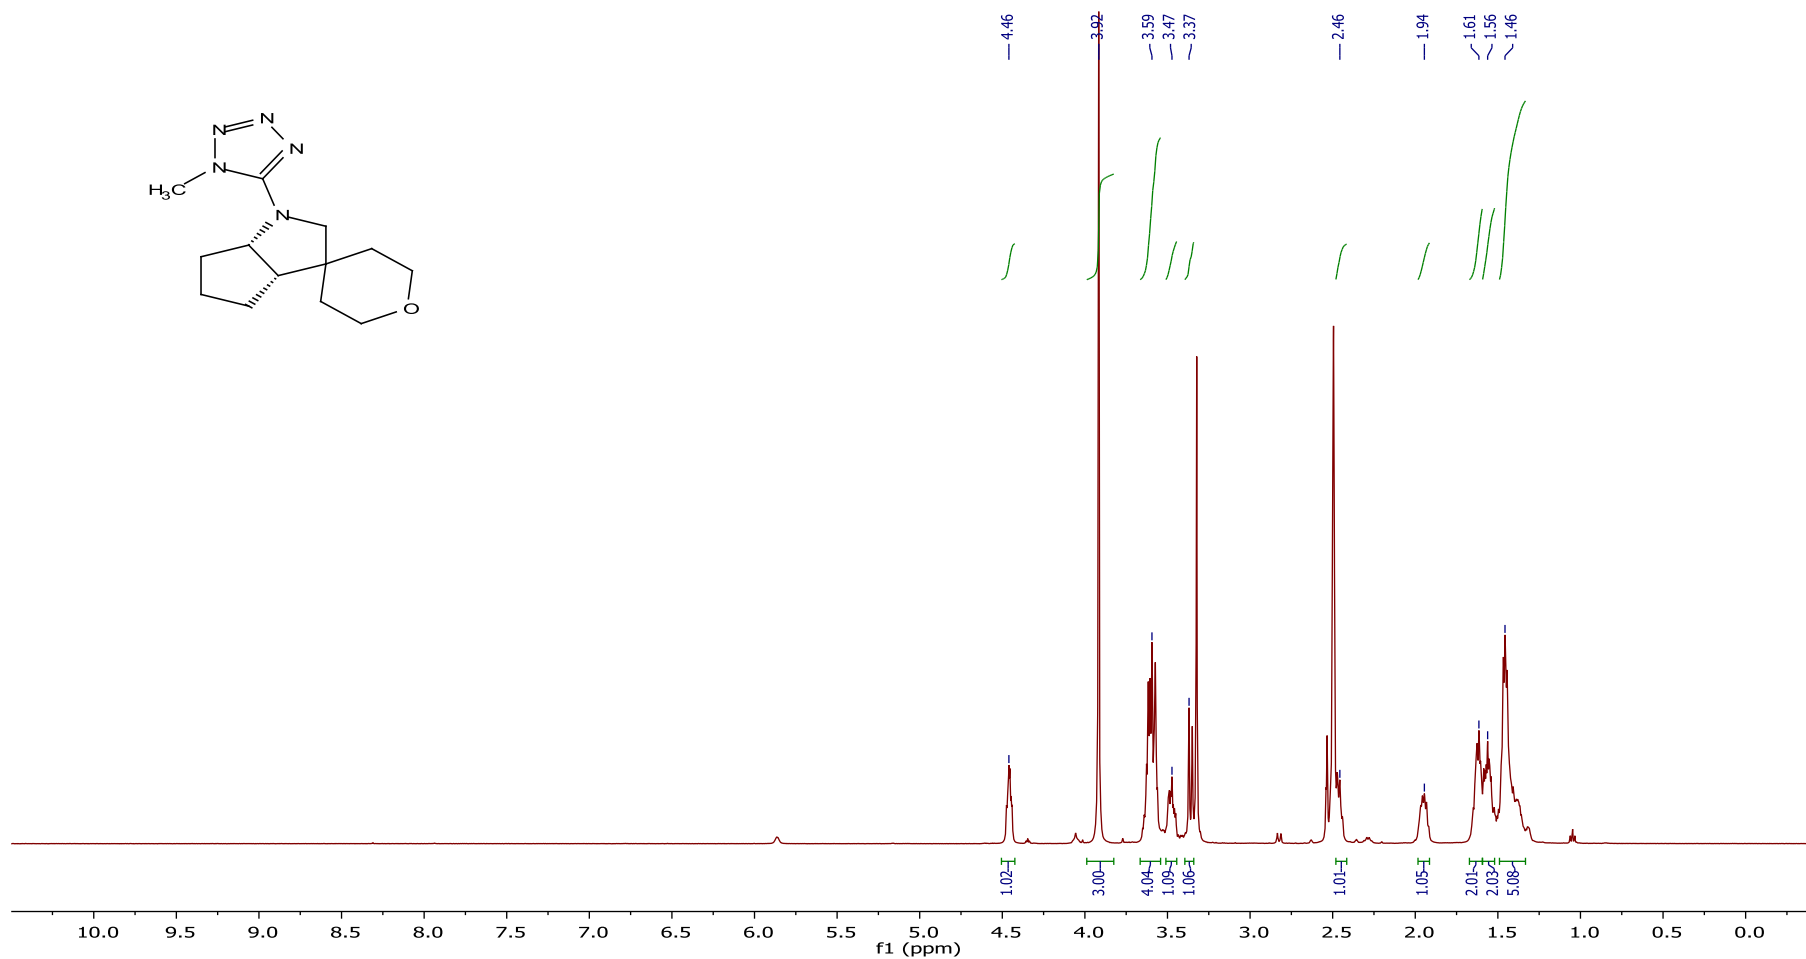



$^{13}\text{C}$  NMR spectrum of the compound **8**{2,8}.

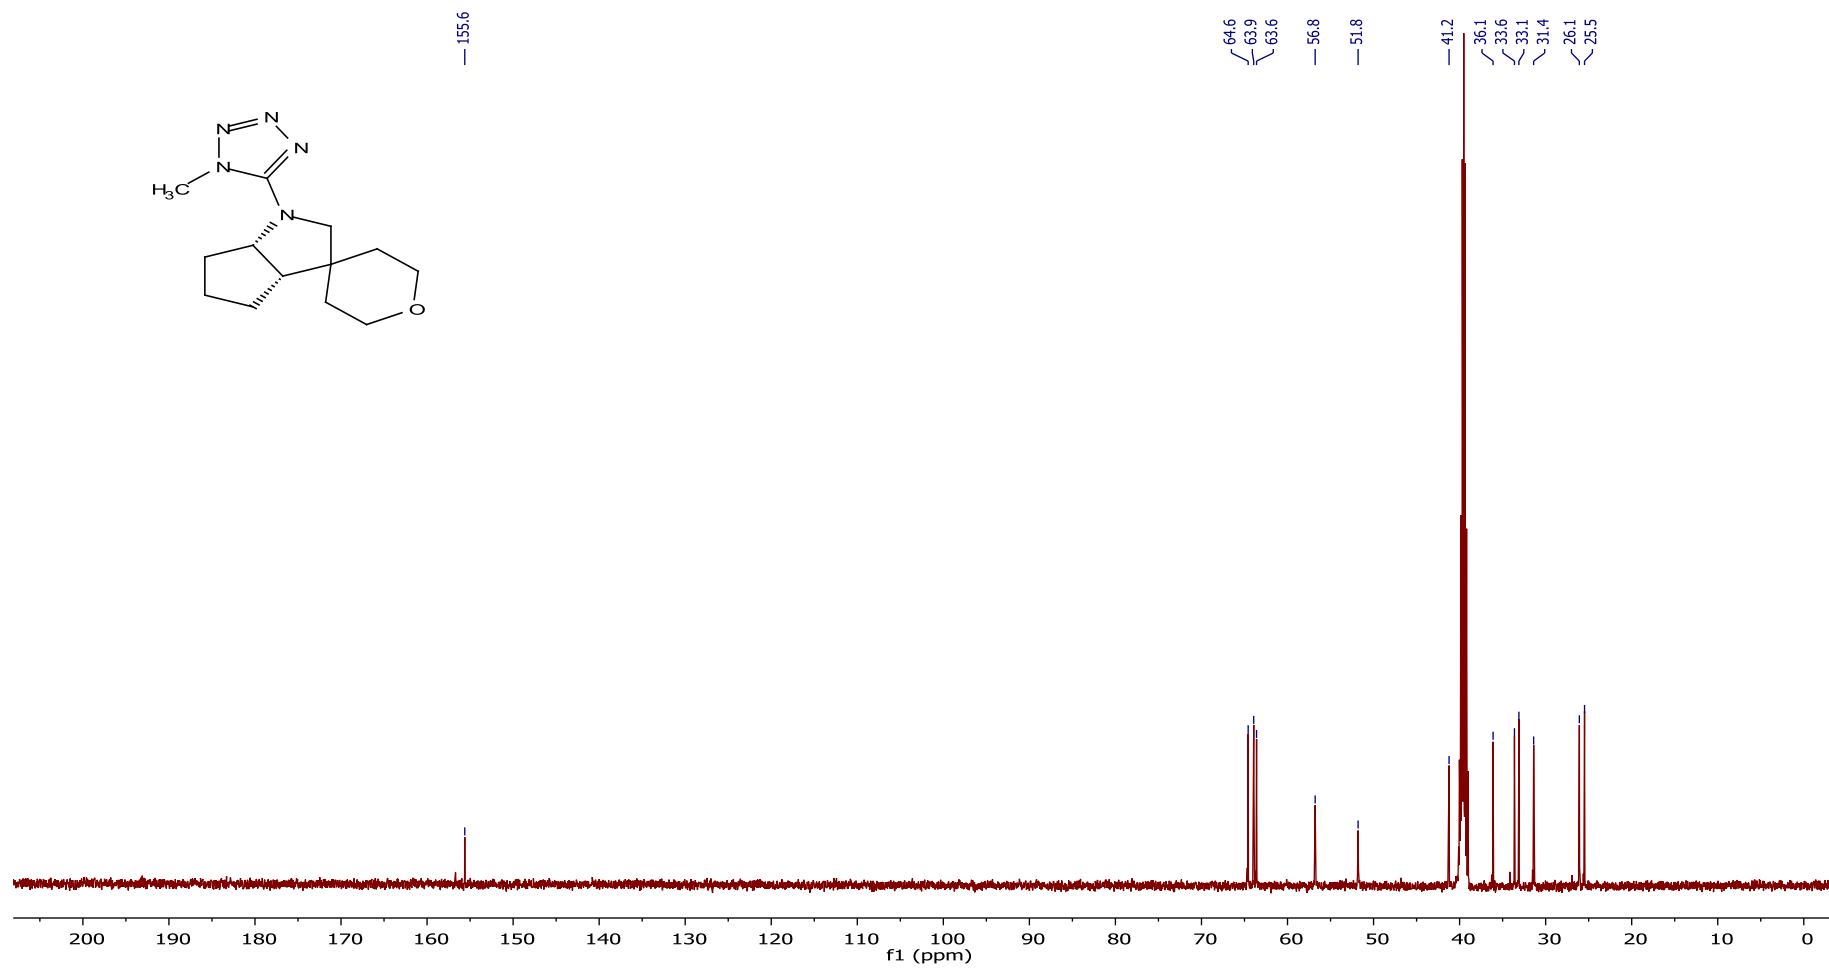

<sup>1</sup>H NMR spectrum of the compound **8**{10,50}.

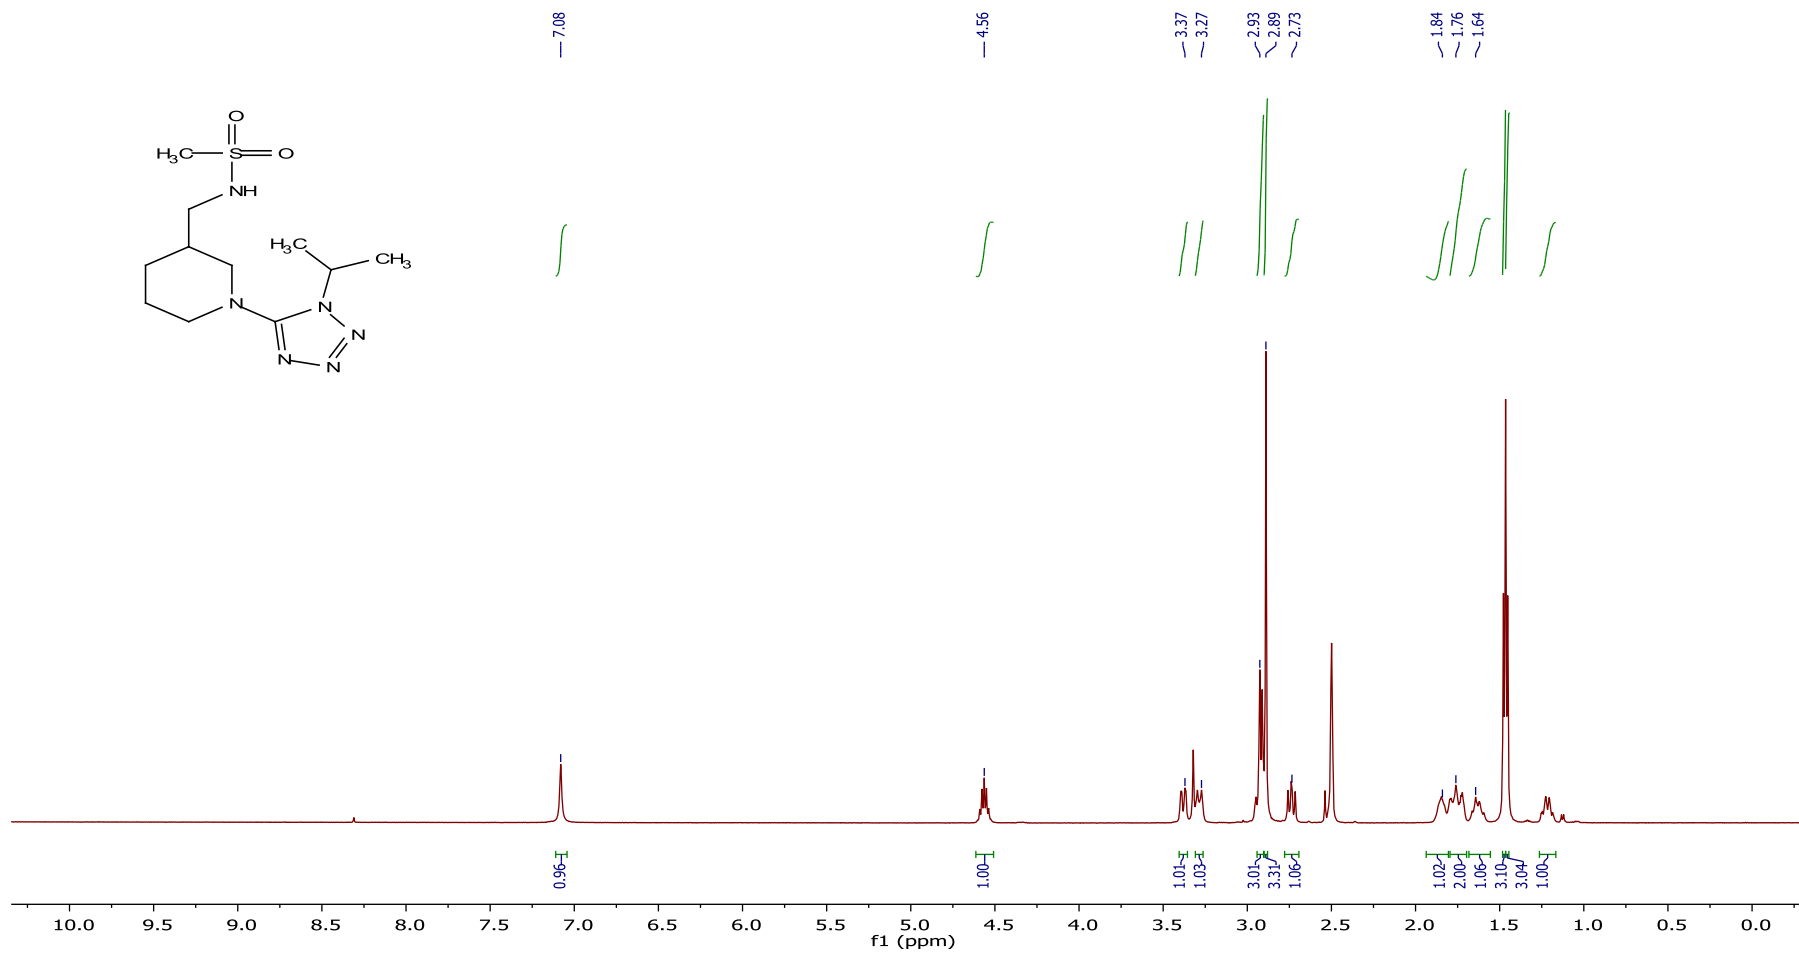

$^{13}\text{C}$  NMR spectrum of the compound **8**{10,50}.

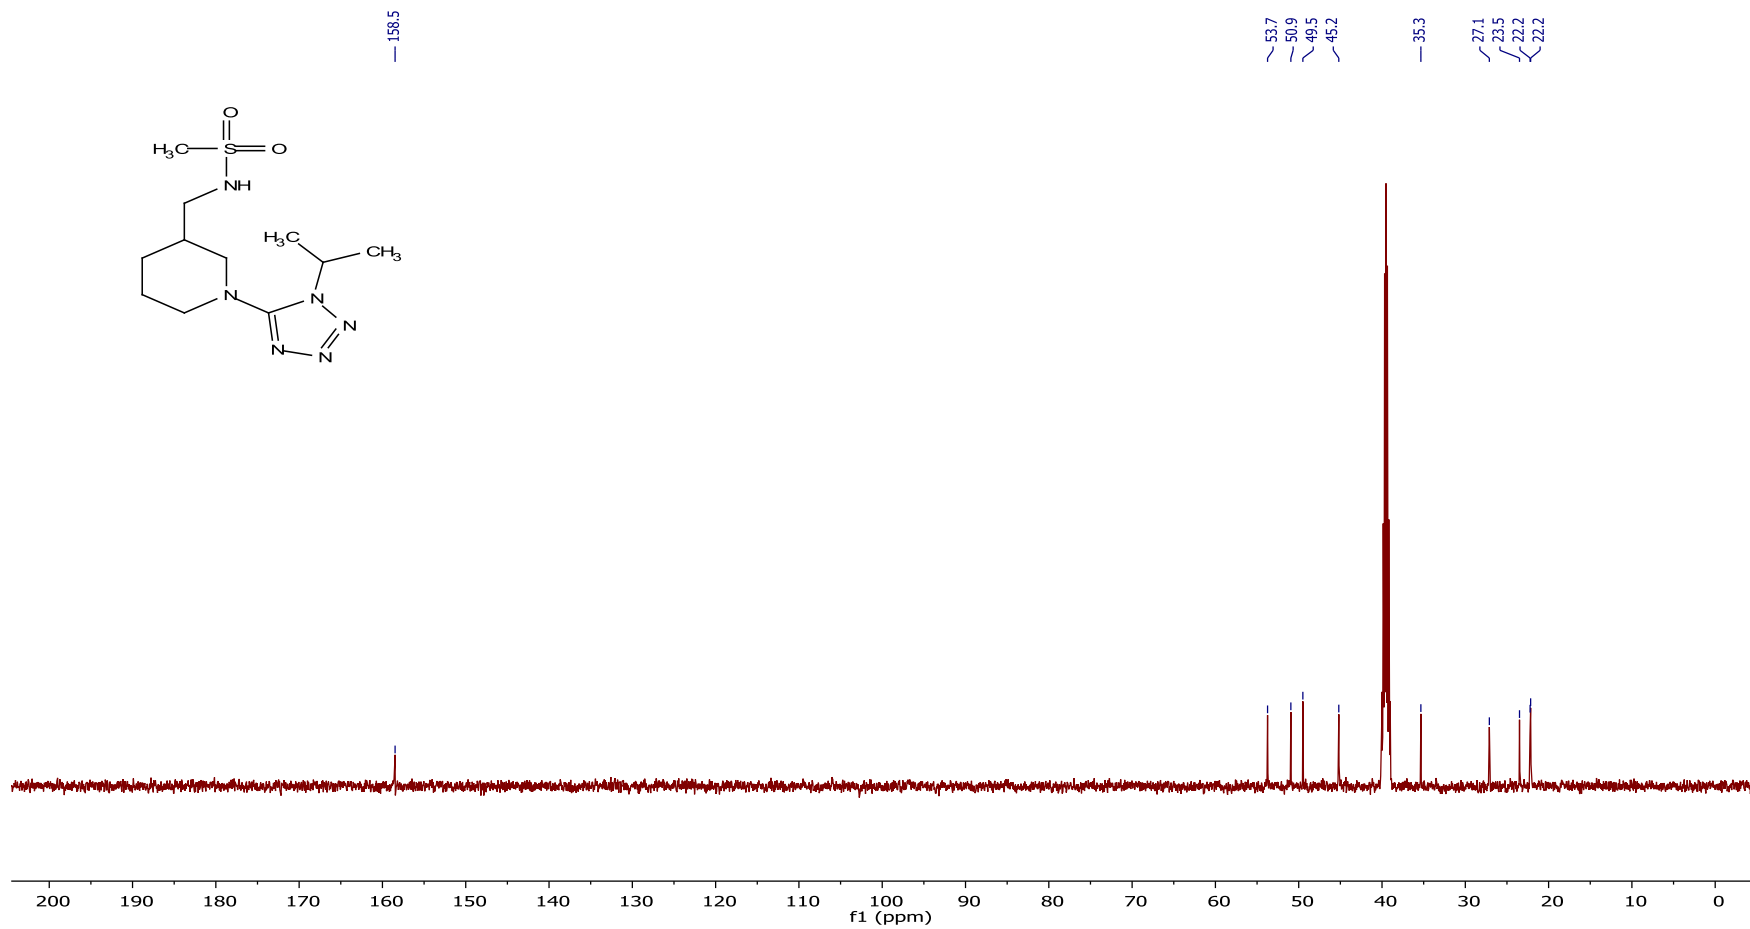

<sup>1</sup>H NMR spectrum of the compound **8**{15,8}.

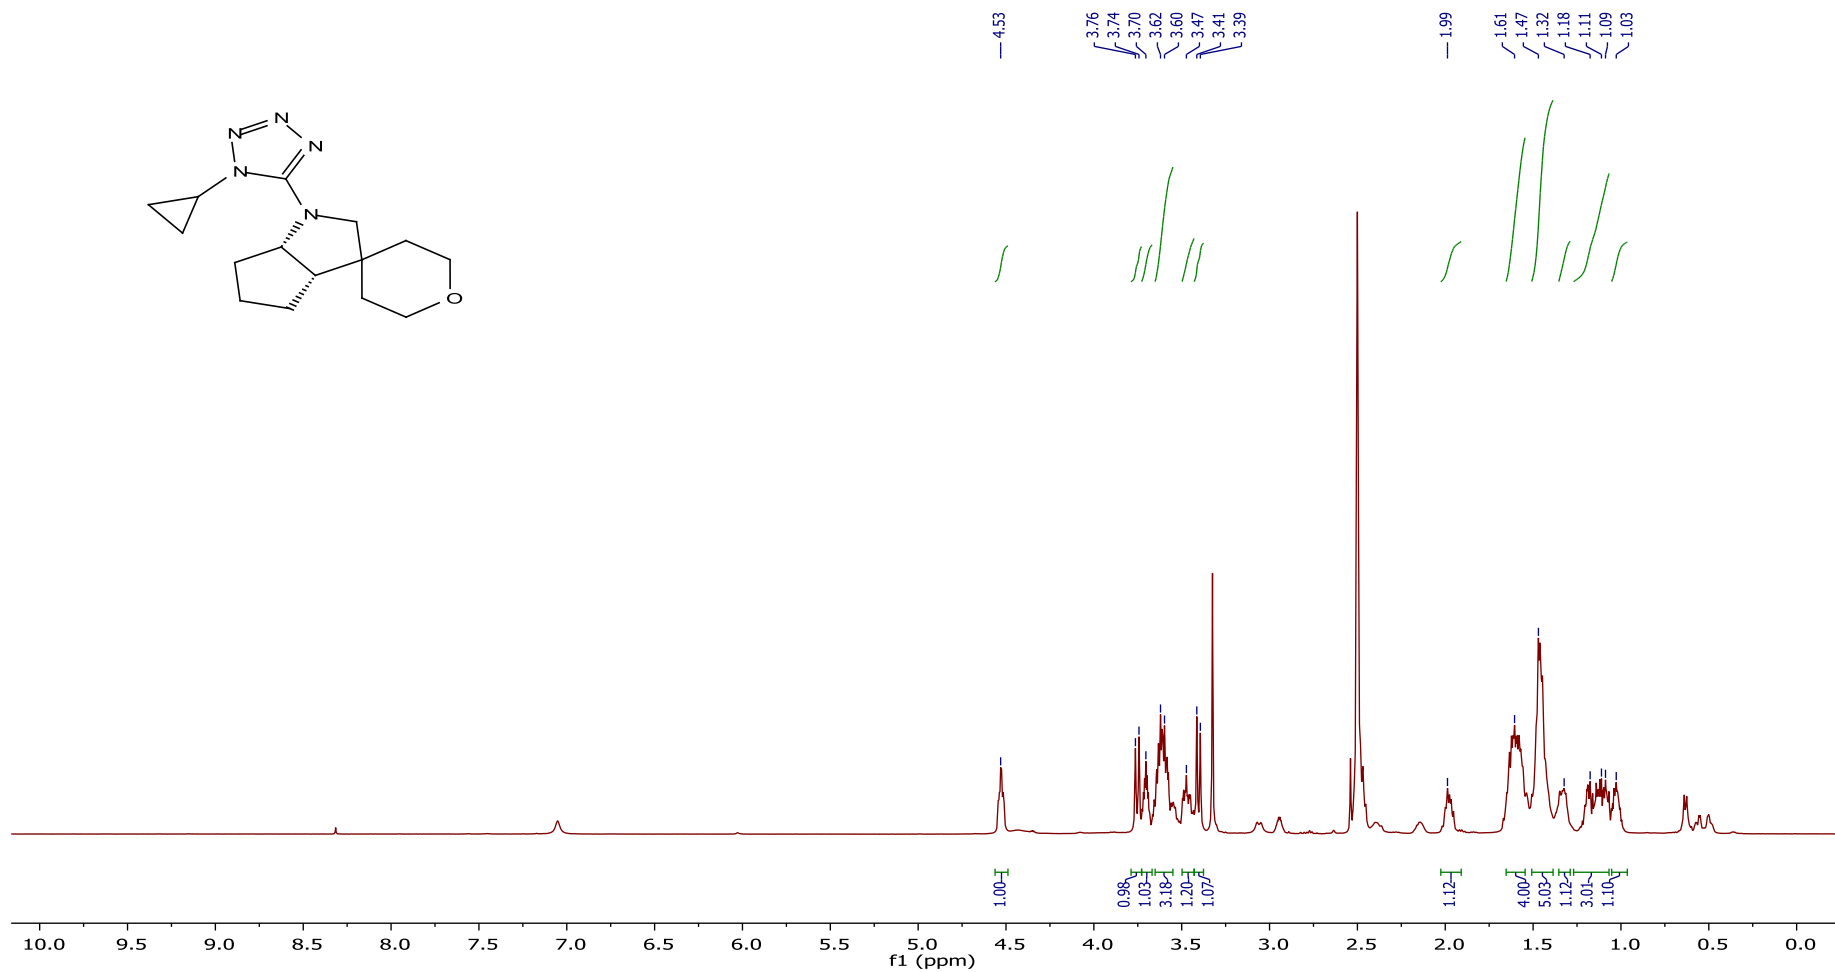

$^{13}\text{C}$  NMR spectrum of the compound **8**{15,8}.

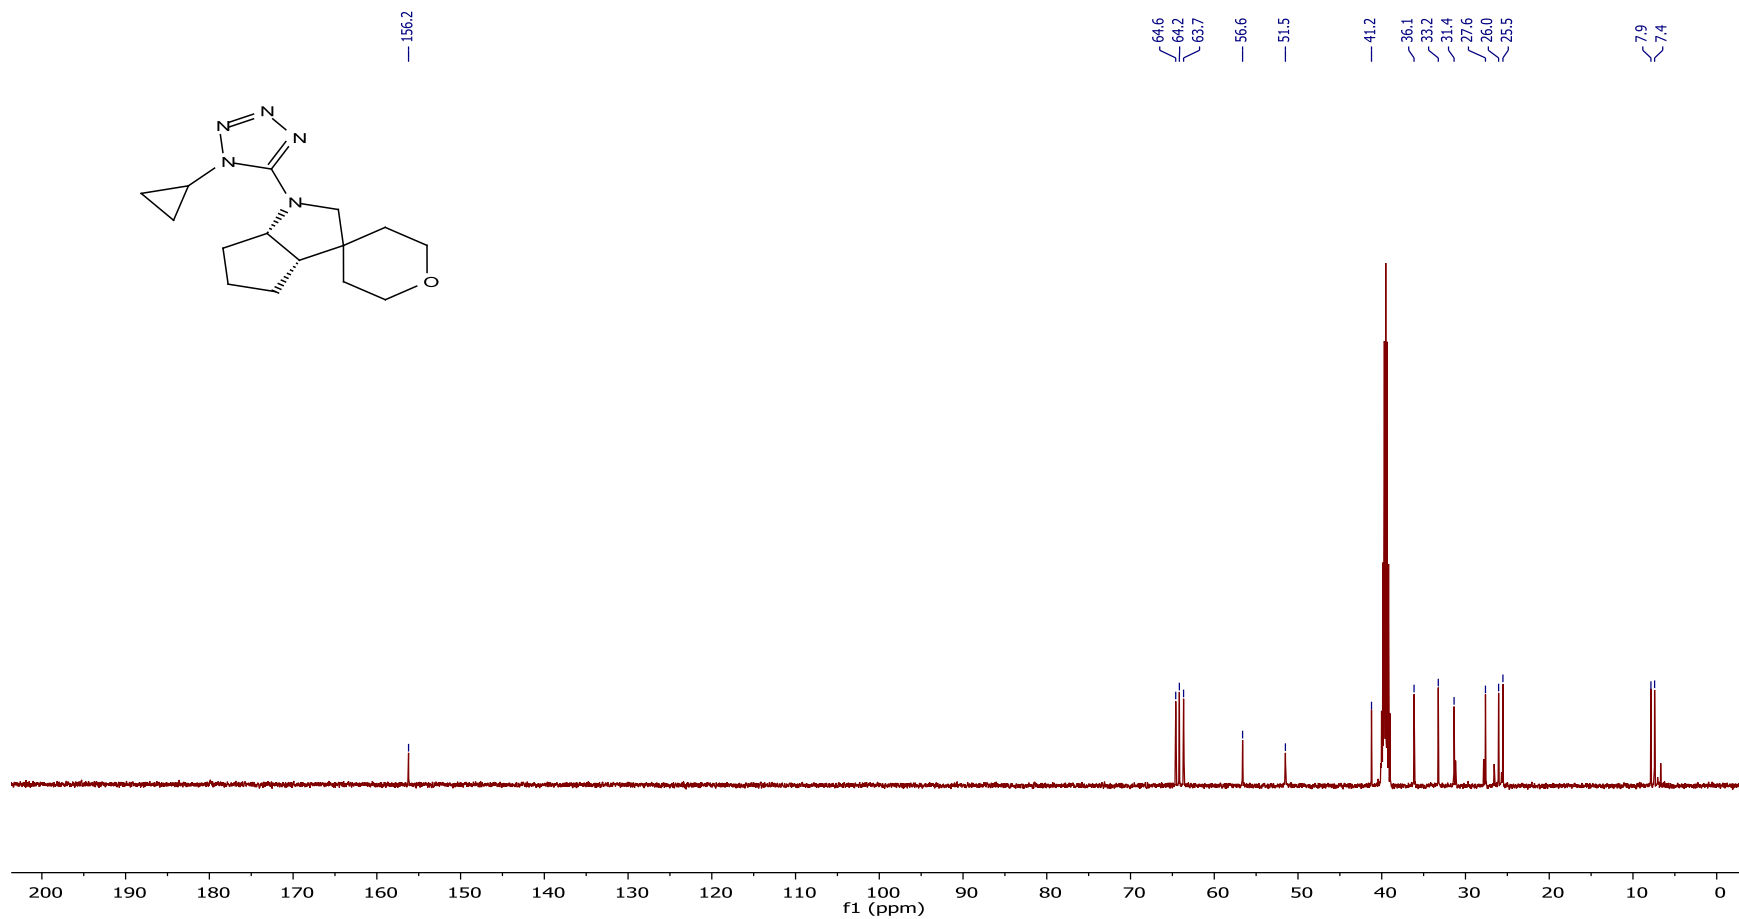

$^1\text{H}$  NMR spectrum of the compound **8**{15,71}.

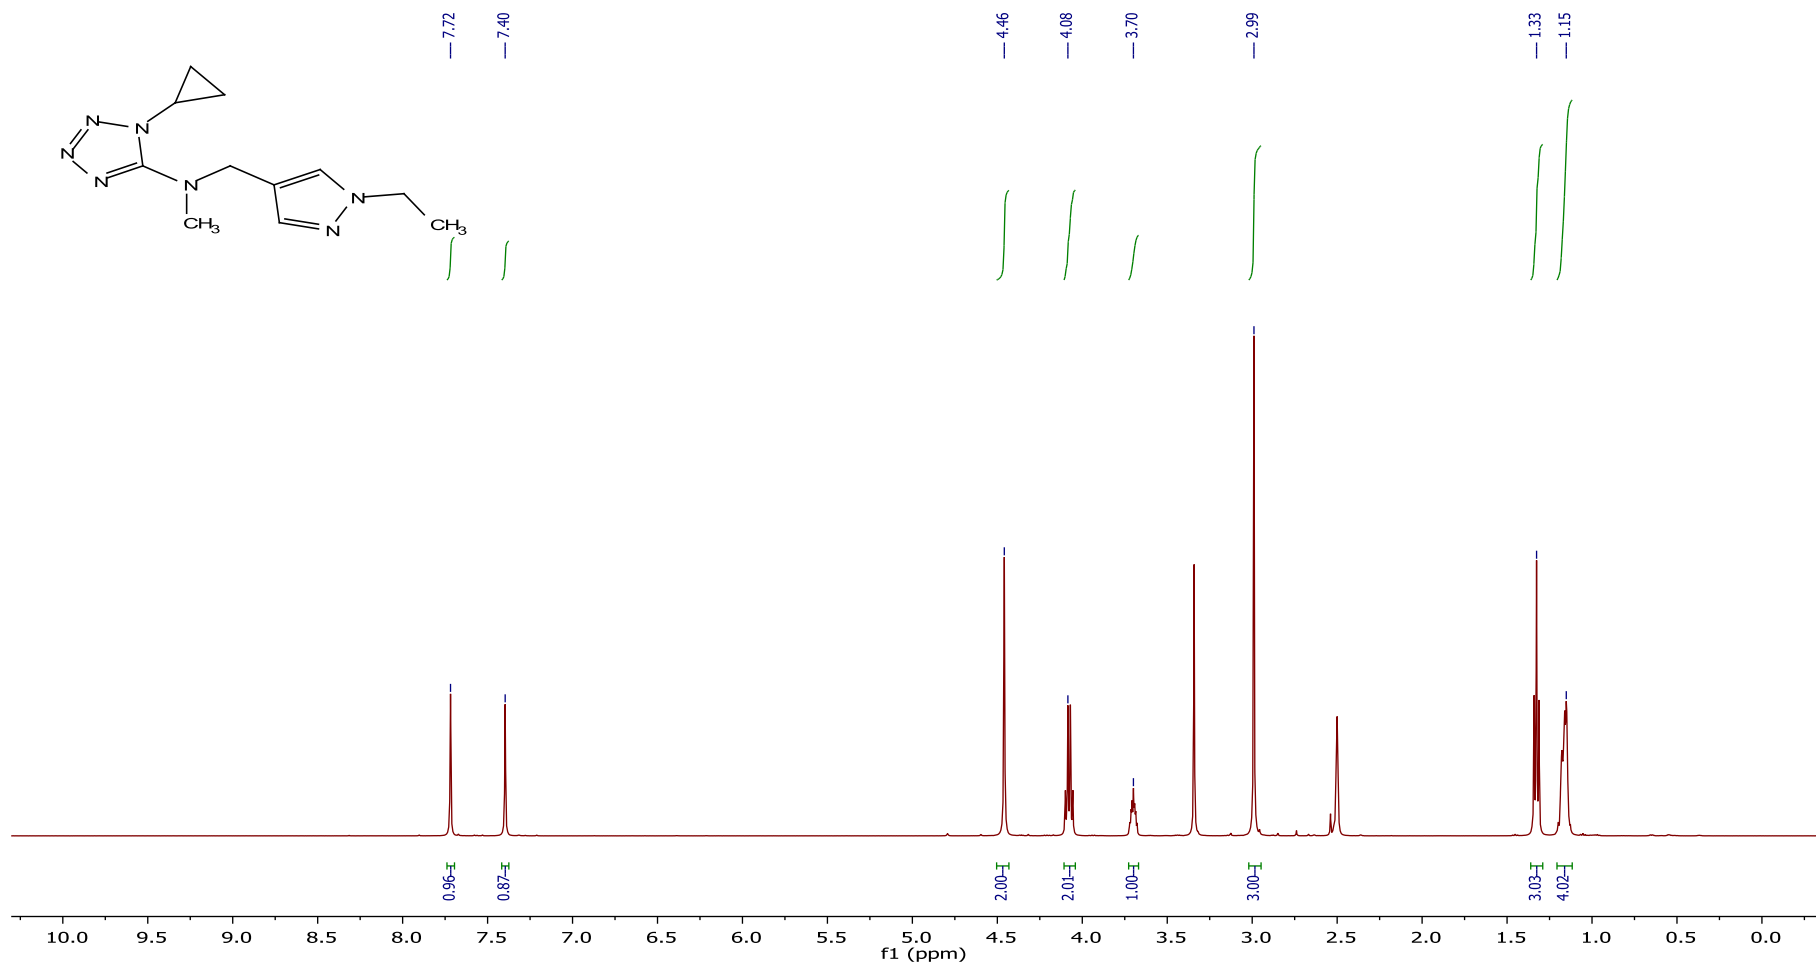

$^{13}\text{C}$  NMR spectrum of the compound **8**{15,71}.

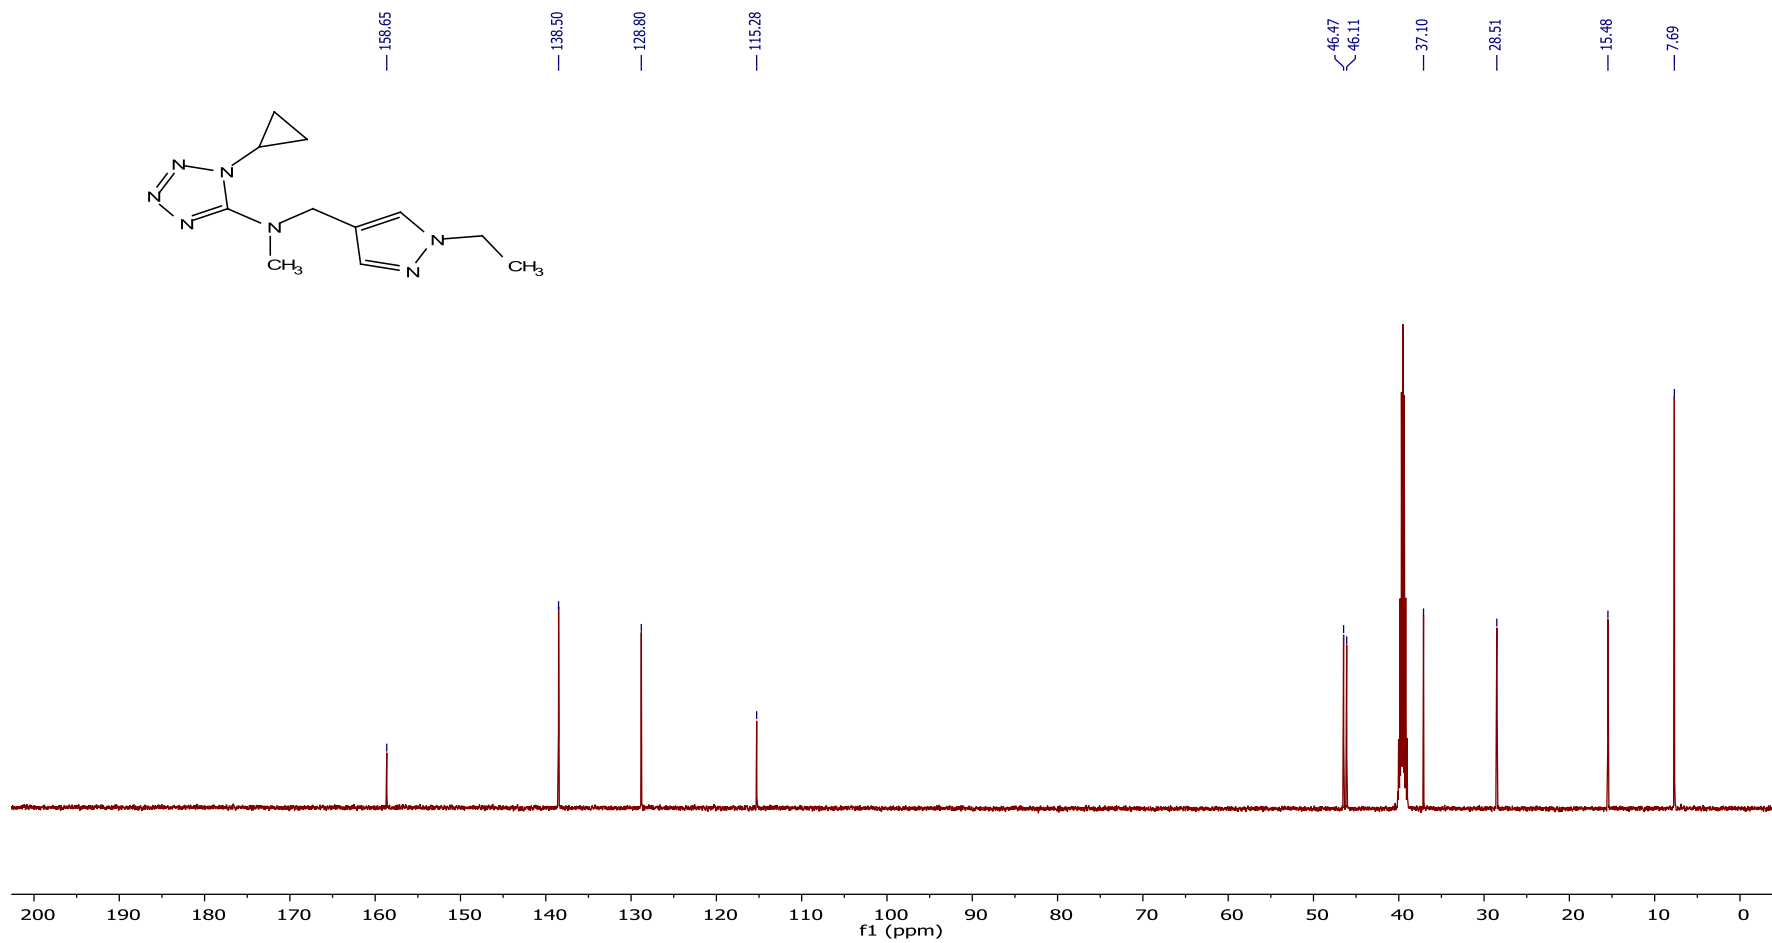

<sup>1</sup>H NMR spectrum of the compound **8**{15,72}.

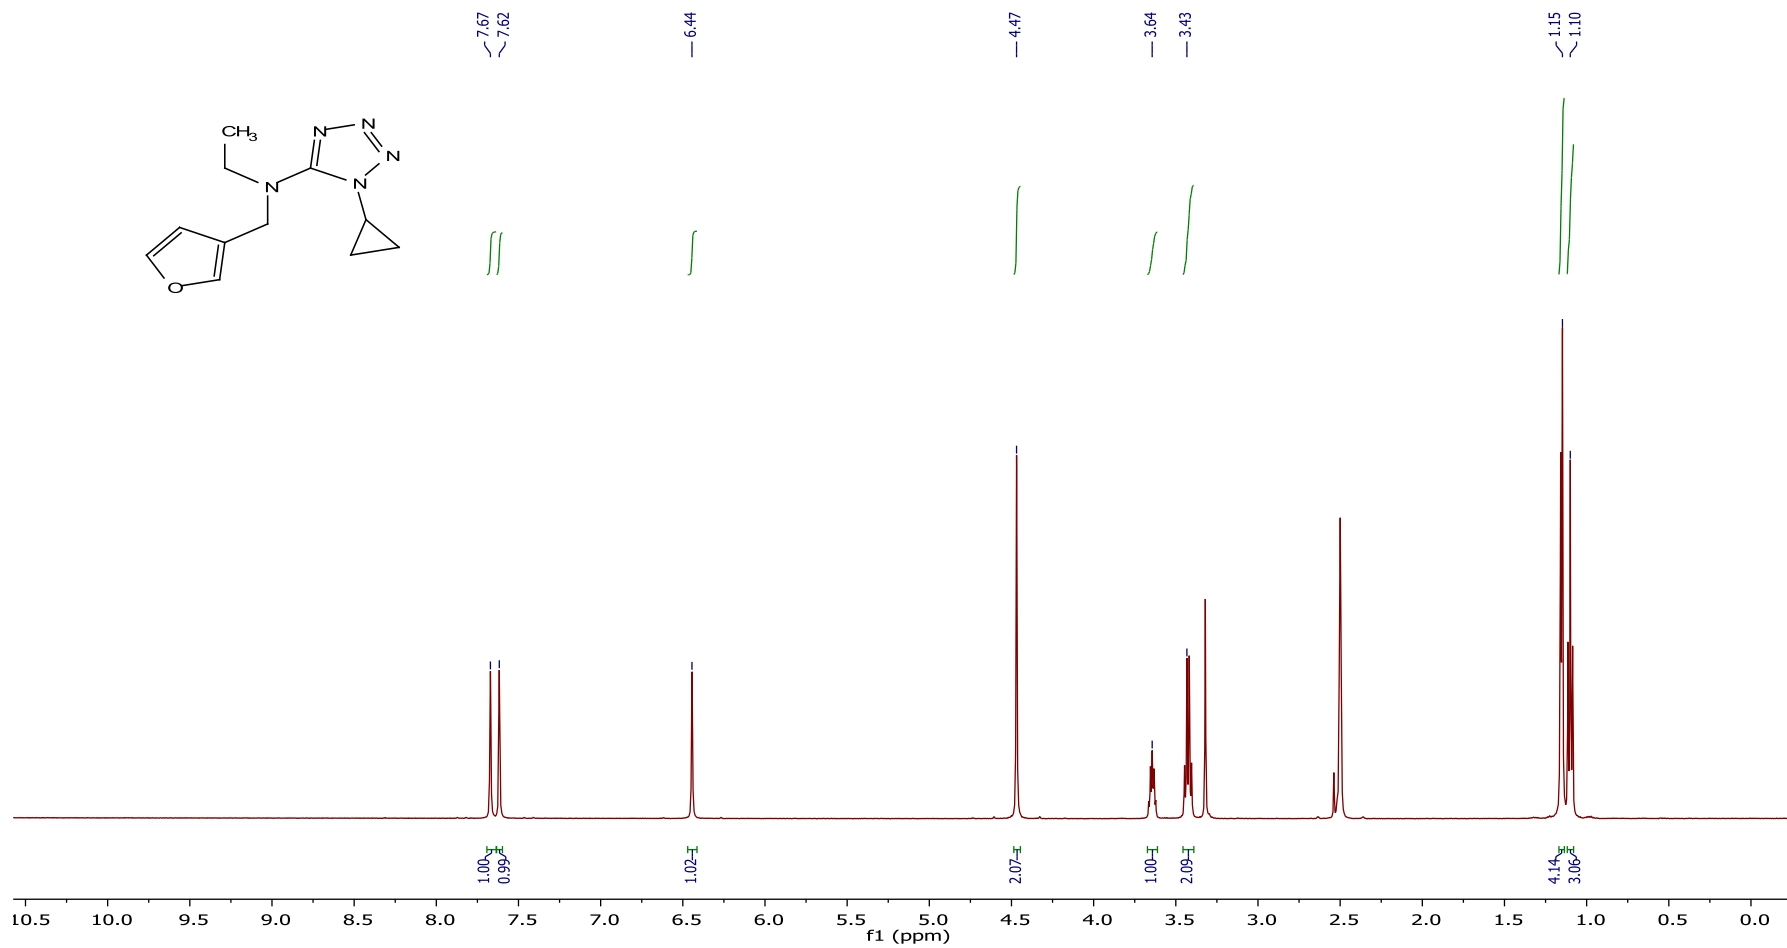



$^{13}\text{C}$  NMR spectrum of the compound **8**{15,72}).

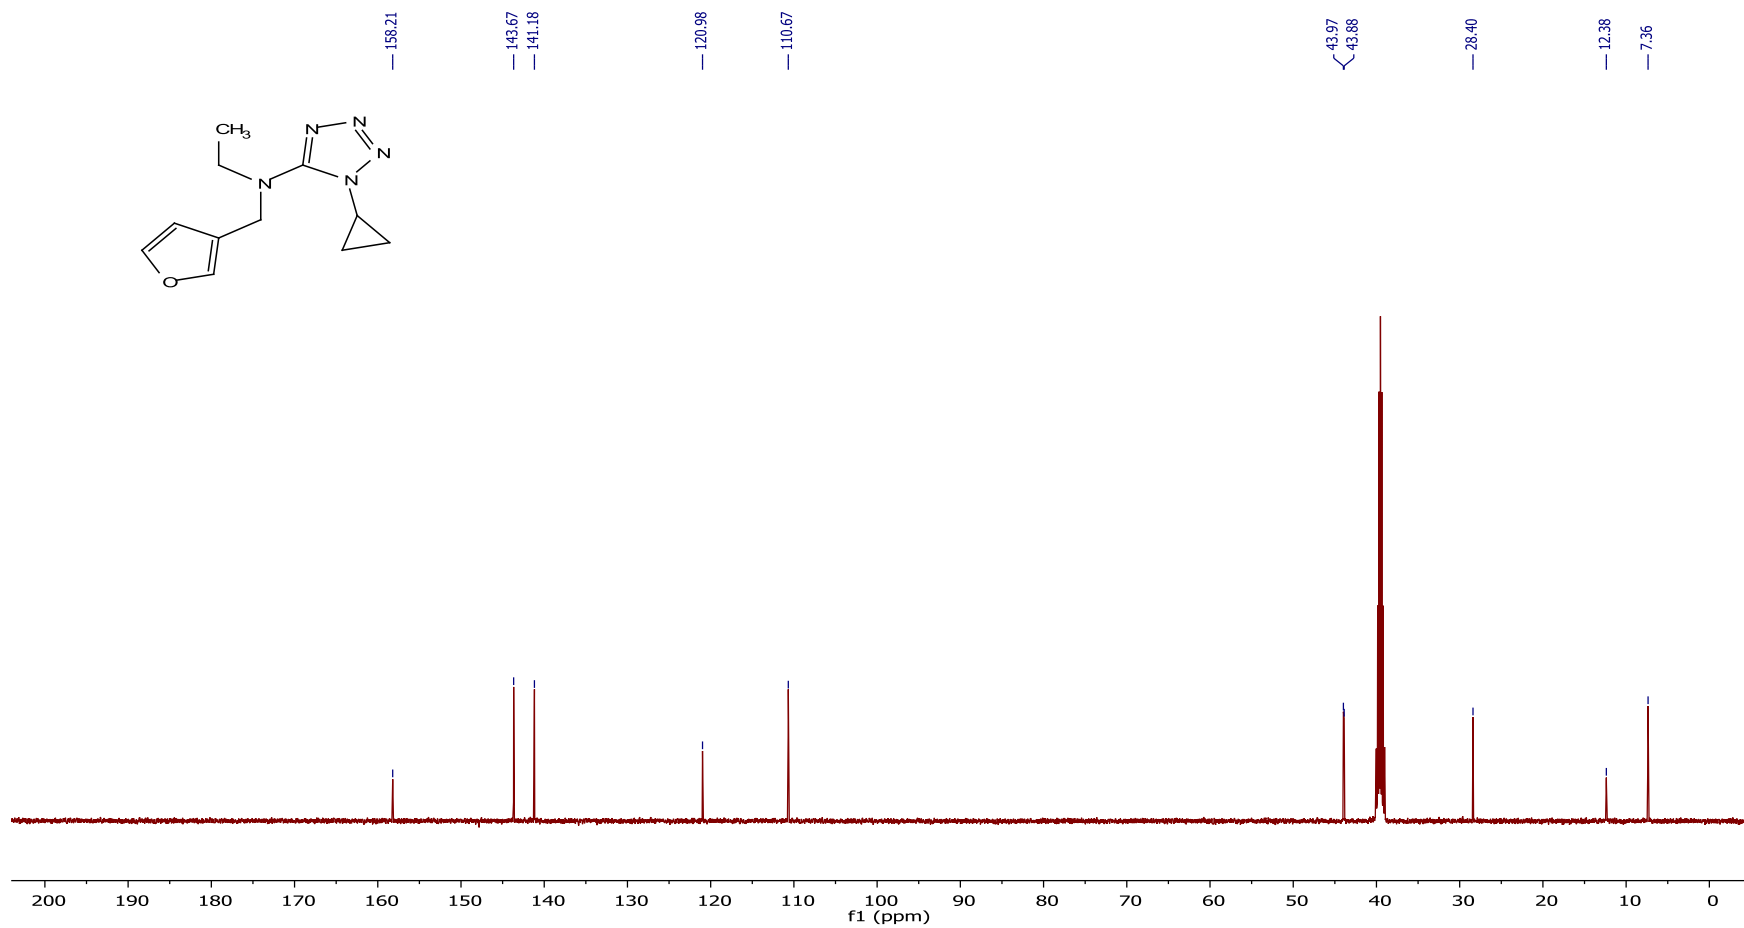

<sup>1</sup>H NMR spectrum of the compound **8**{36,164}.

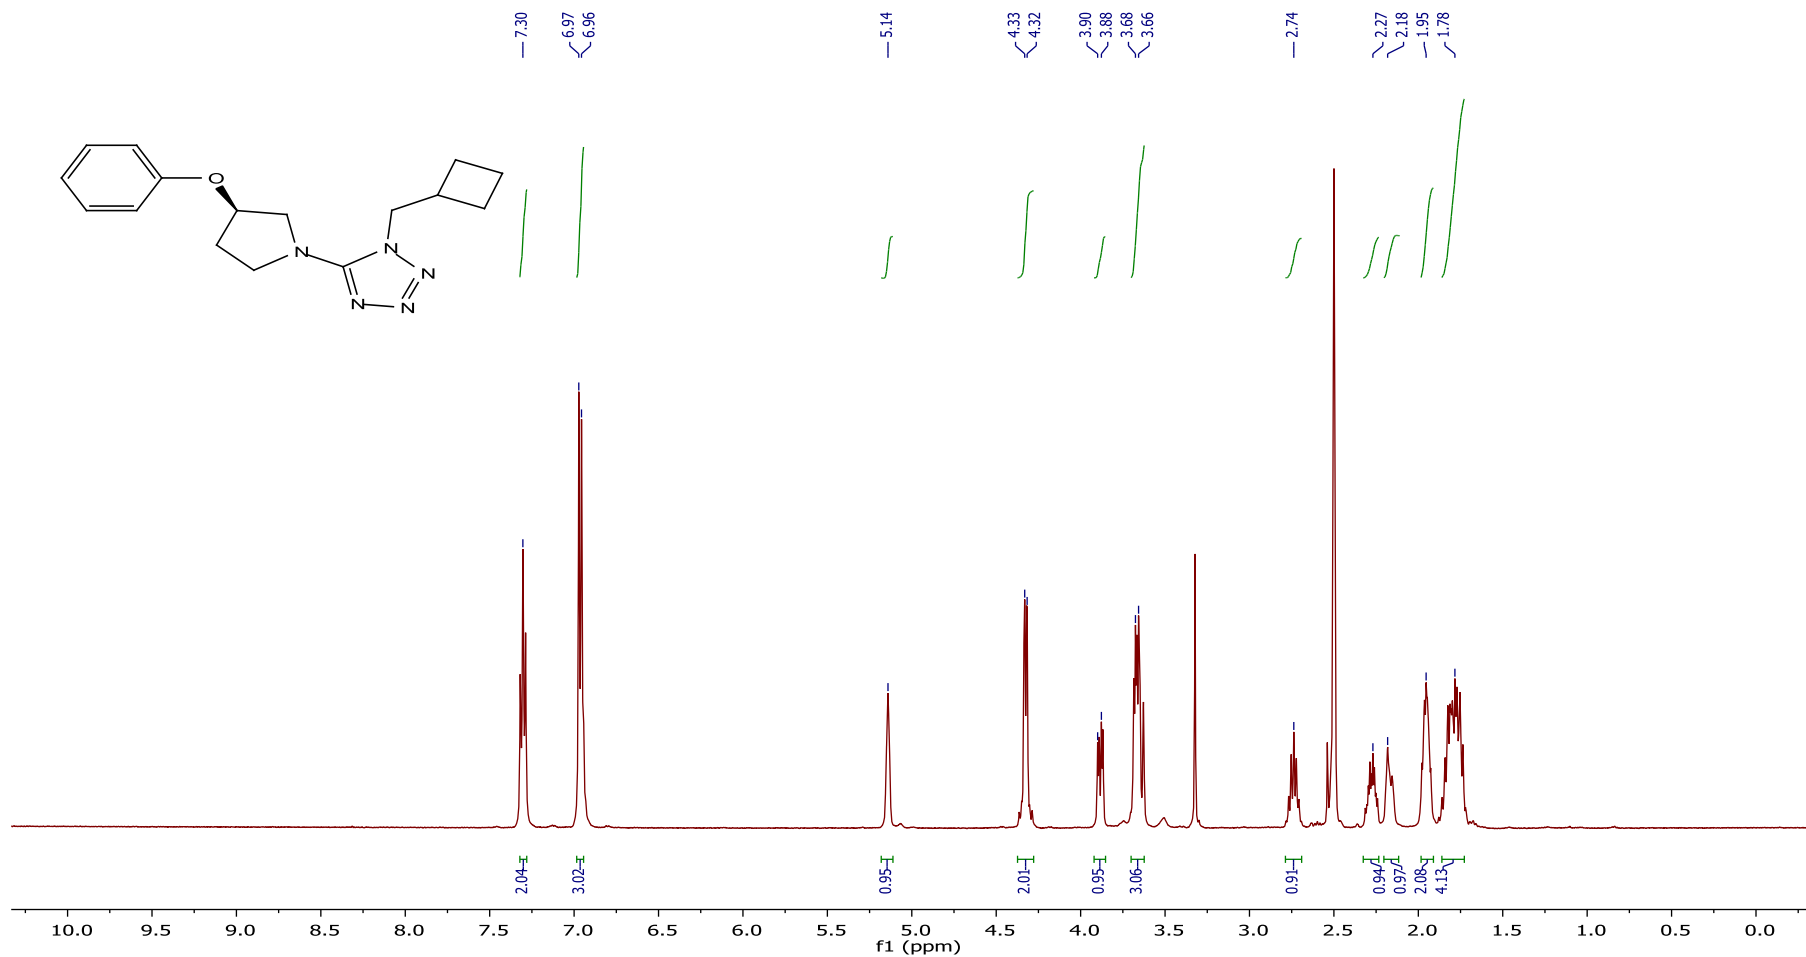

$^{13}\text{C}$  NMR spectrum of the compound **8**{36,164}.

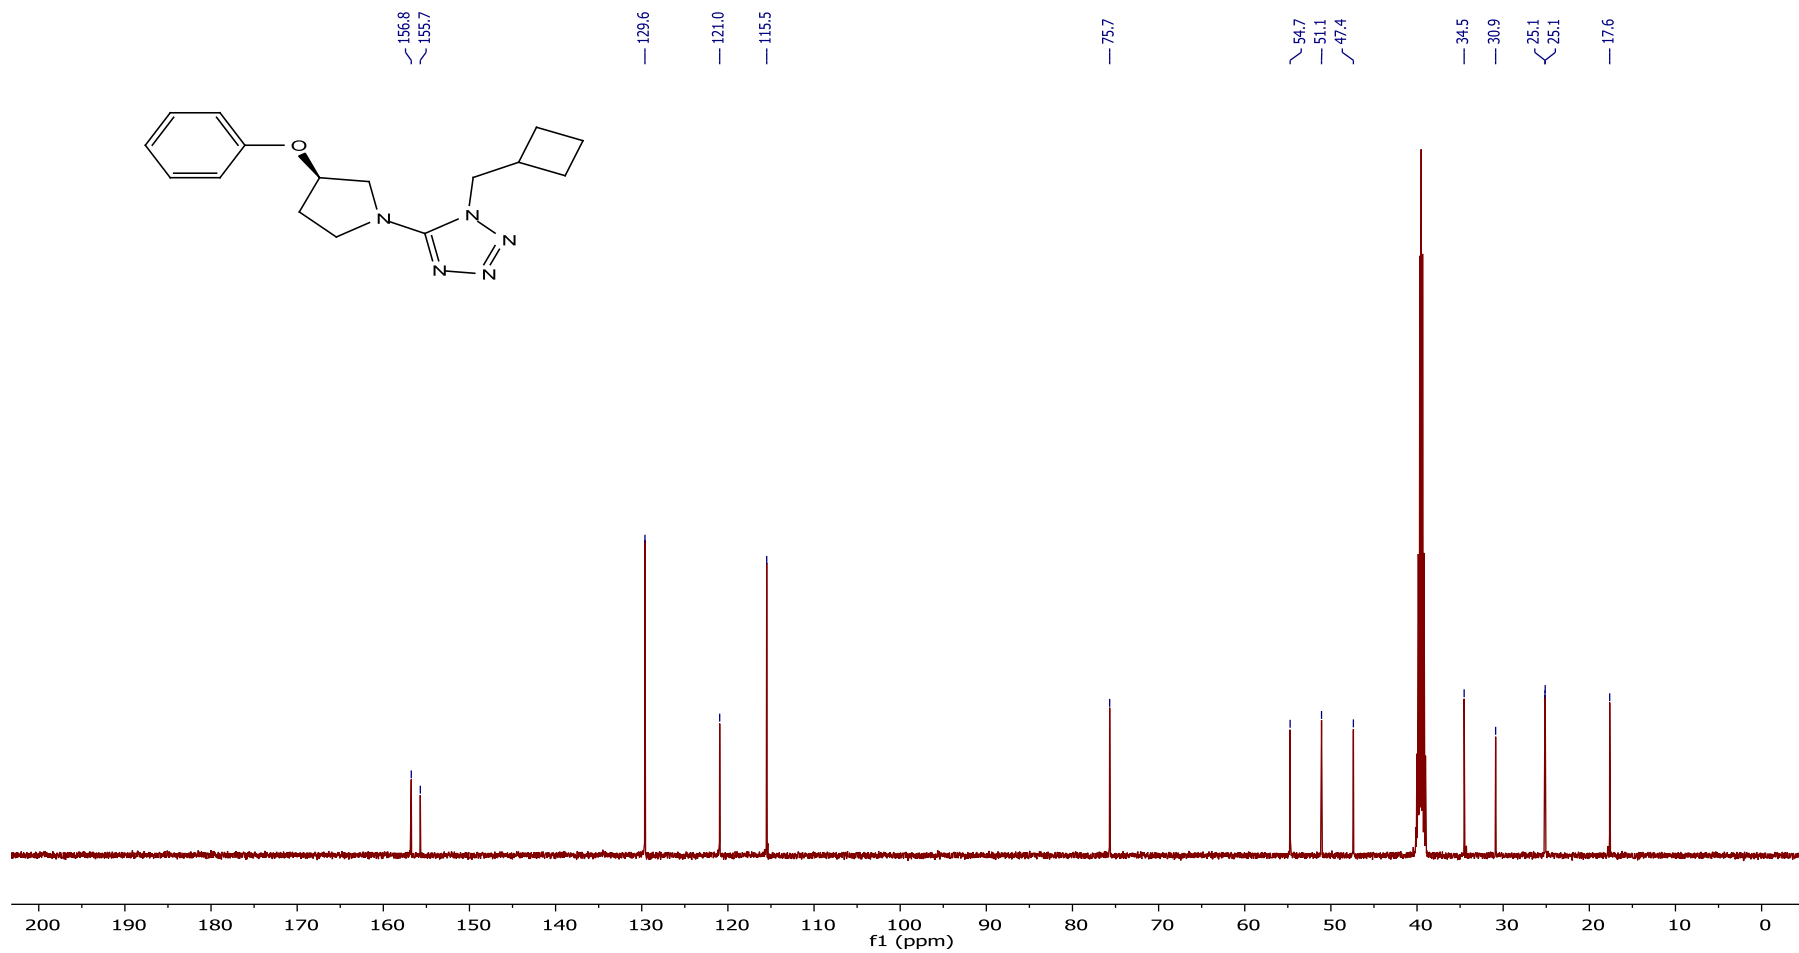

<sup>1</sup>H NMR spectrum of the compound **8**{40,188}.

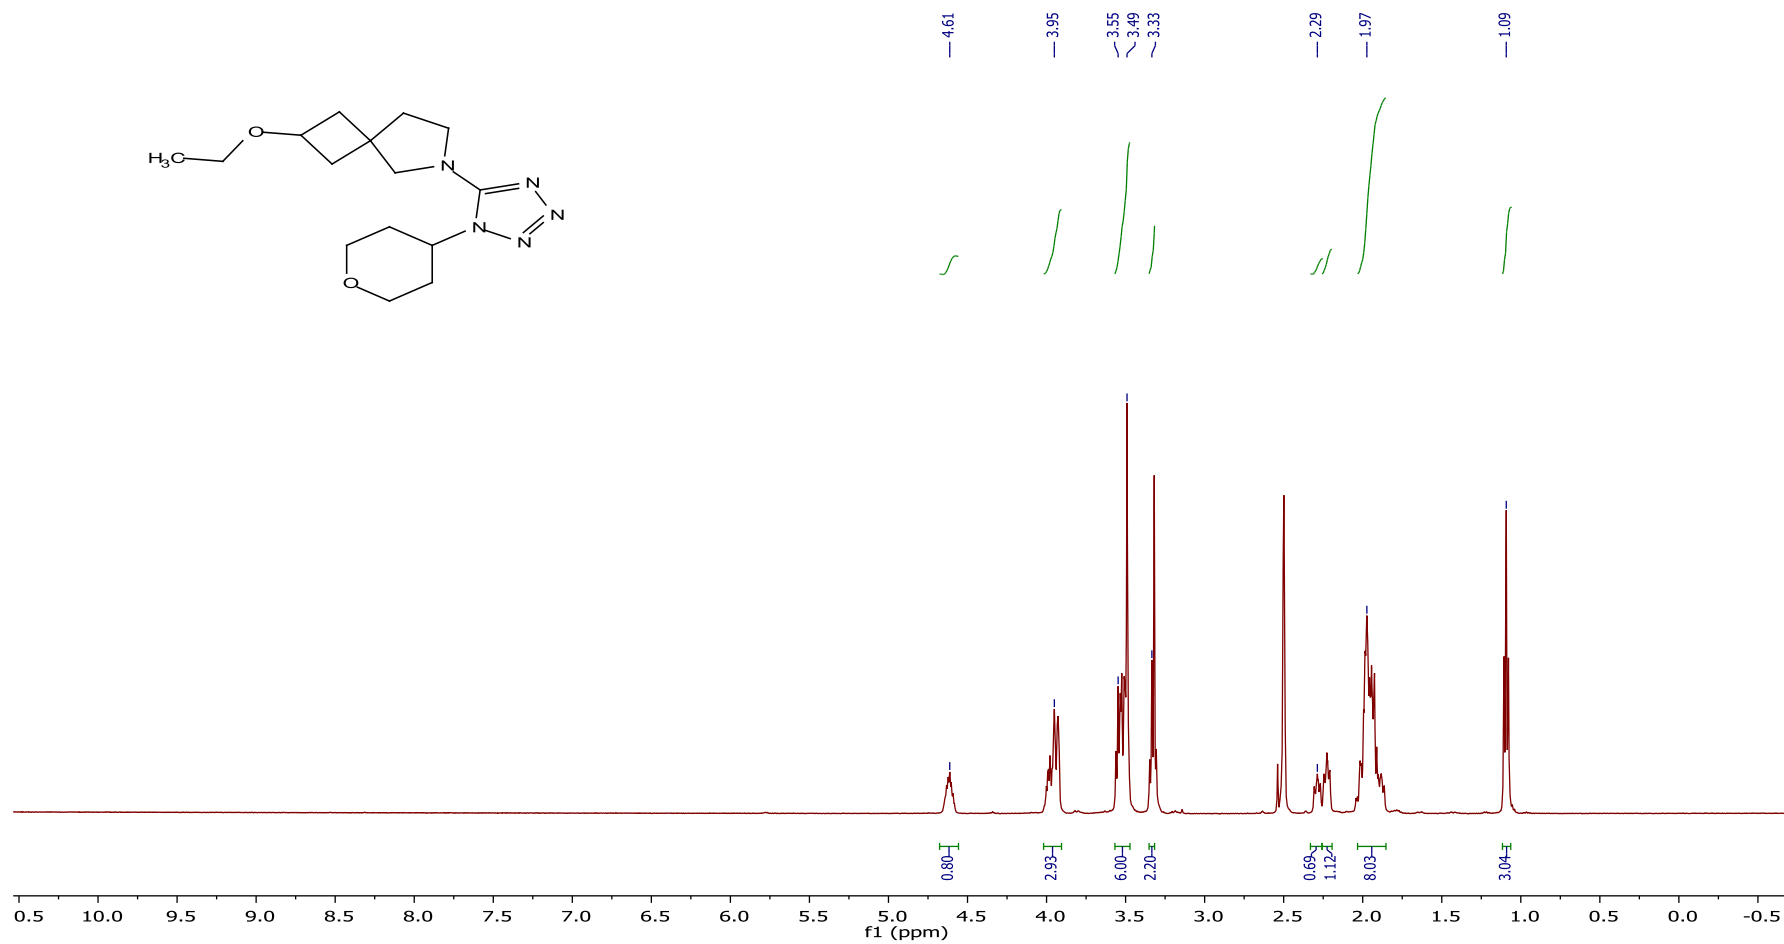

$^{13}\text{C}$  NMR spectrum of the compound **8**{40,188}.

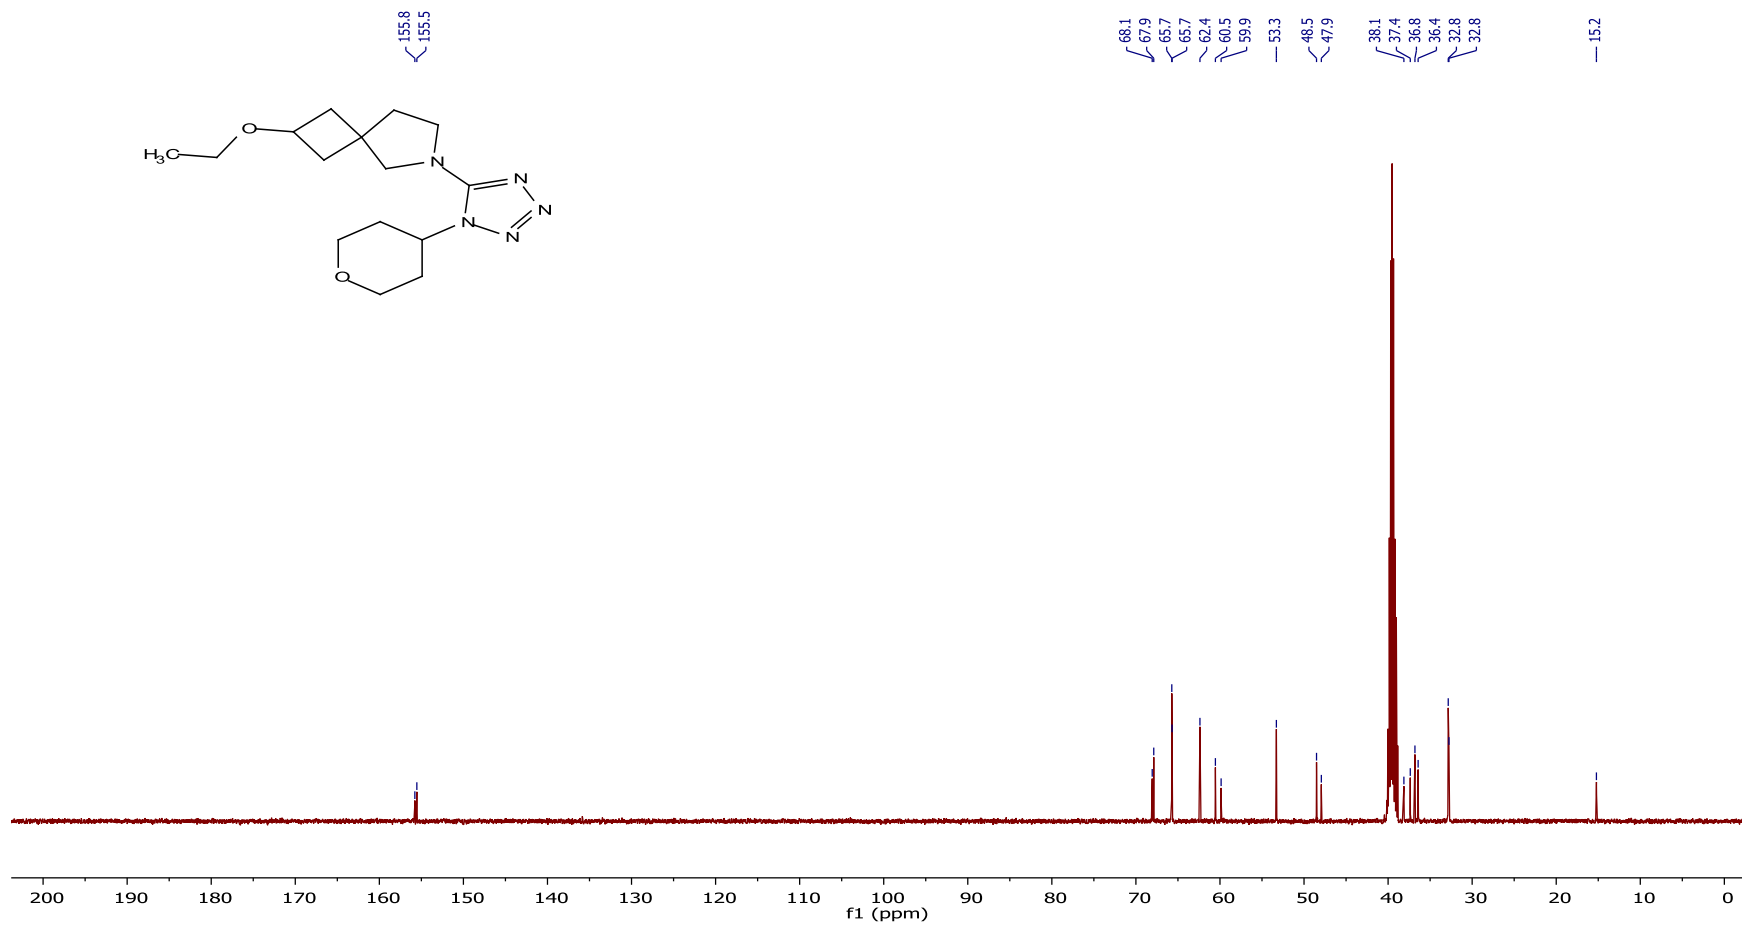

<sup>1</sup>H NMR spectrum of the compound **8**{40,192}.

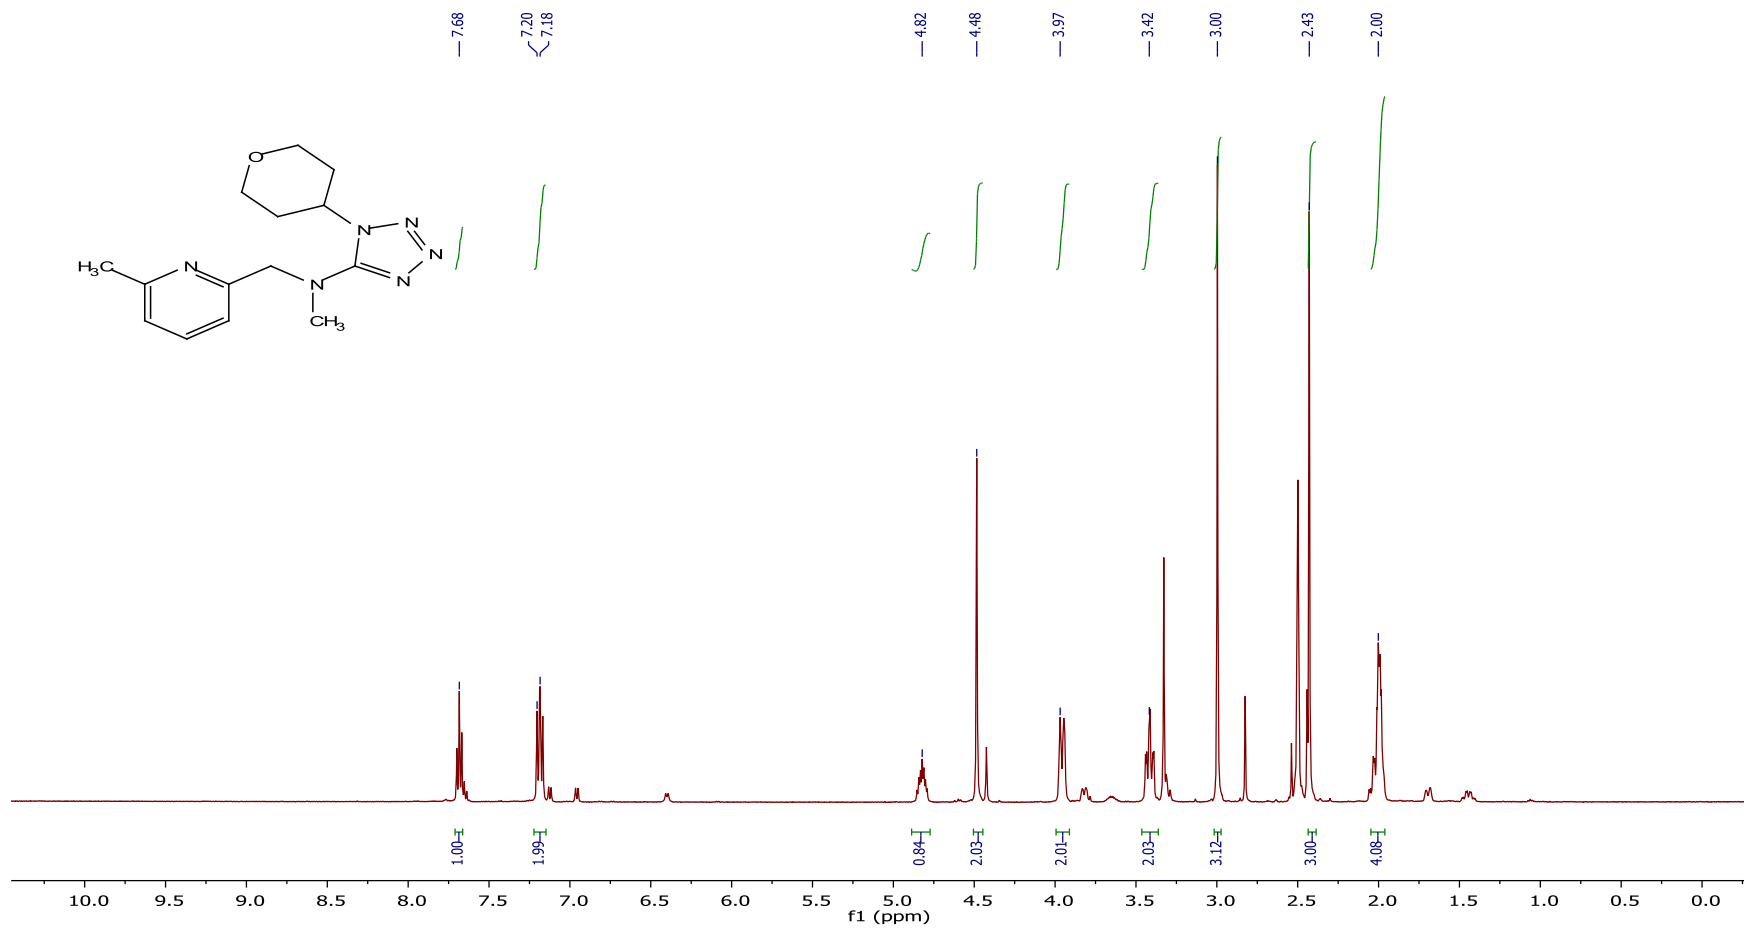

$^{13}\text{C}$  NMR spectrum of the compound **8**{40,192}.

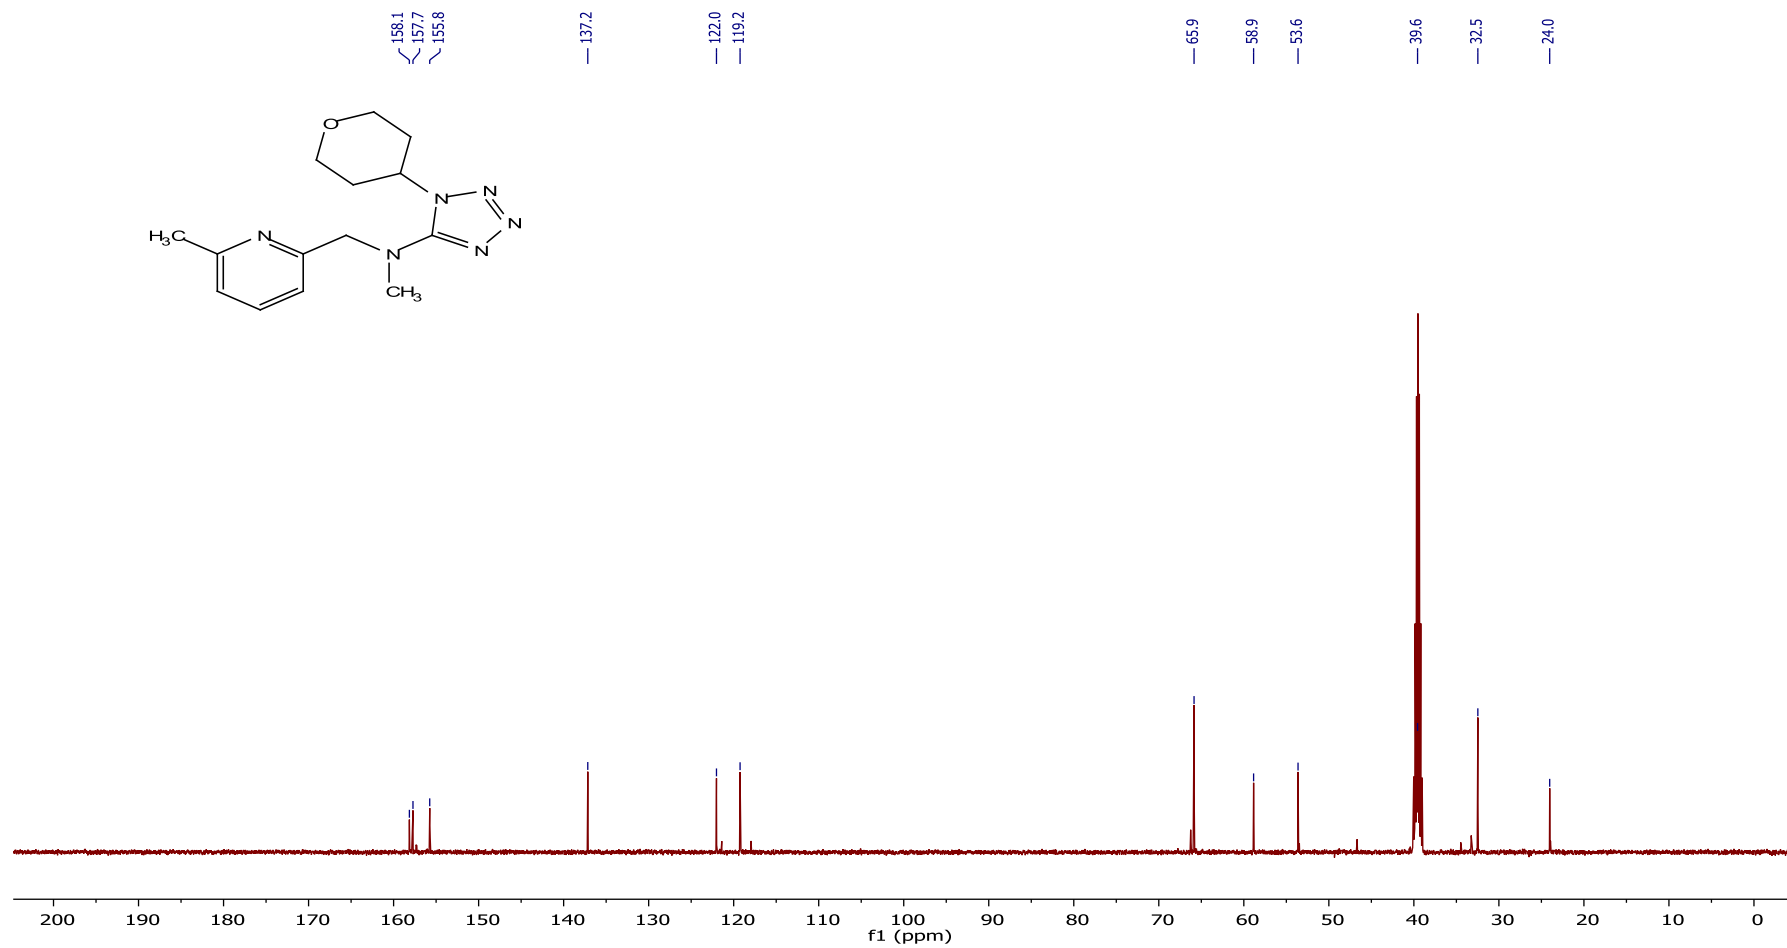

<sup>1</sup>H NMR spectrum of the compound **8**{41,147}.

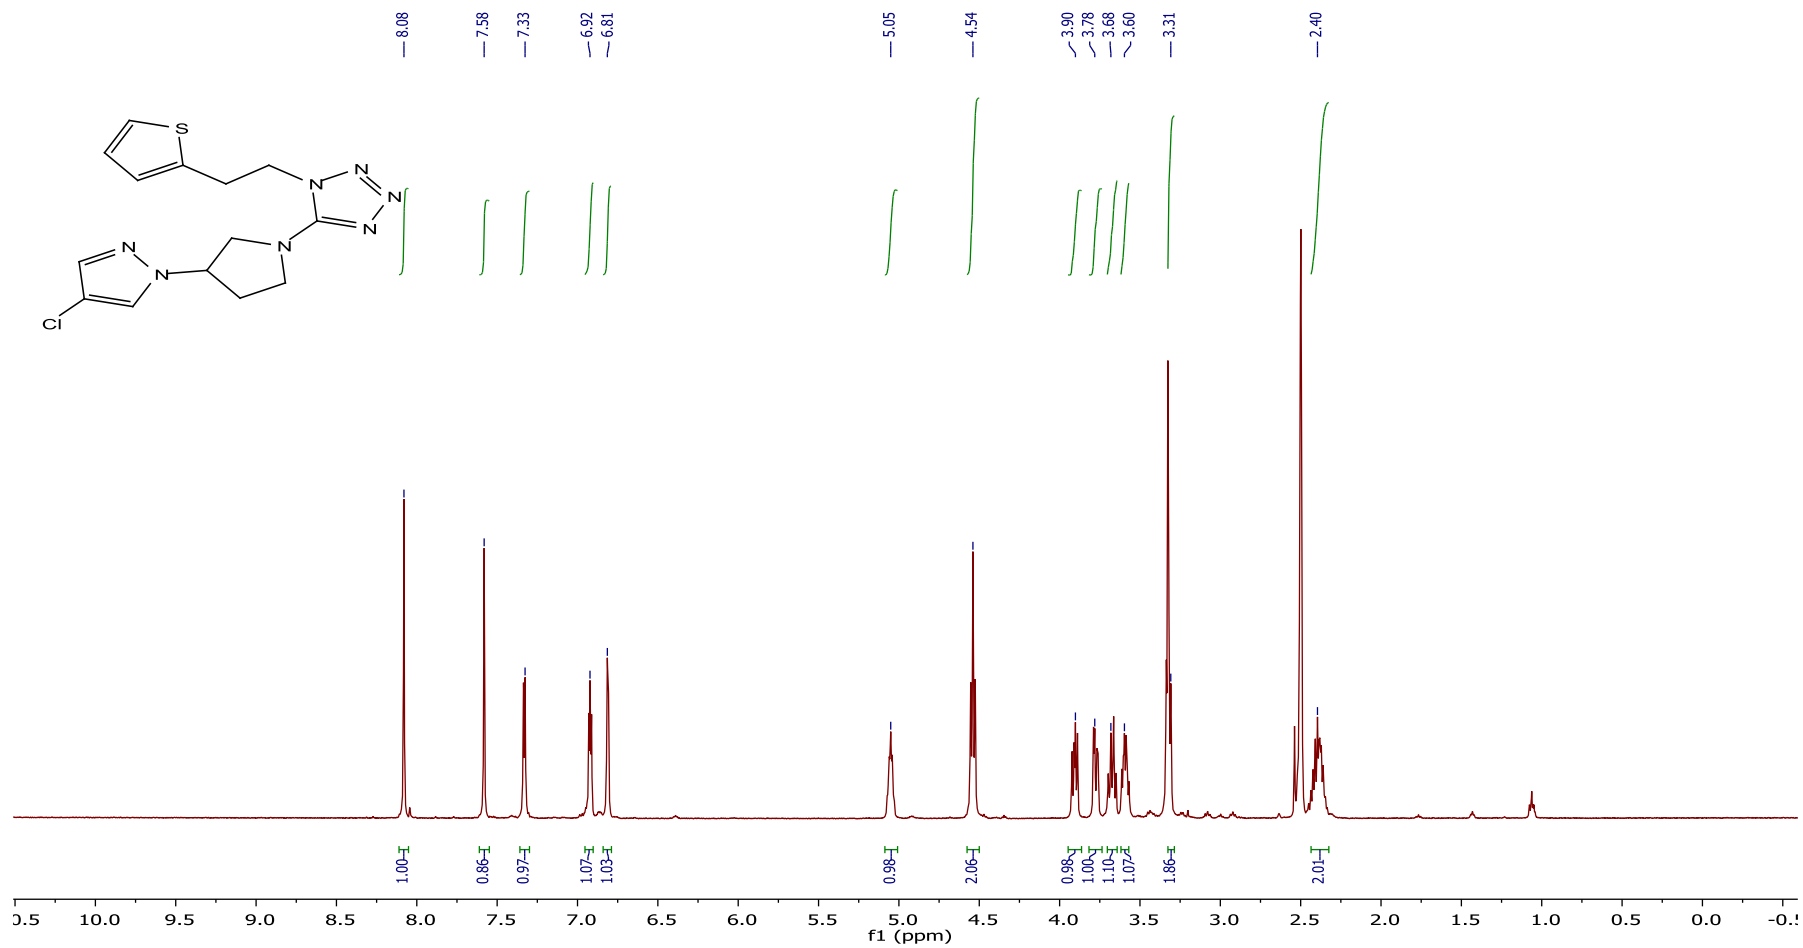



$^{13}\text{C}$  NMR spectrum of the compound **8**{41,147}.

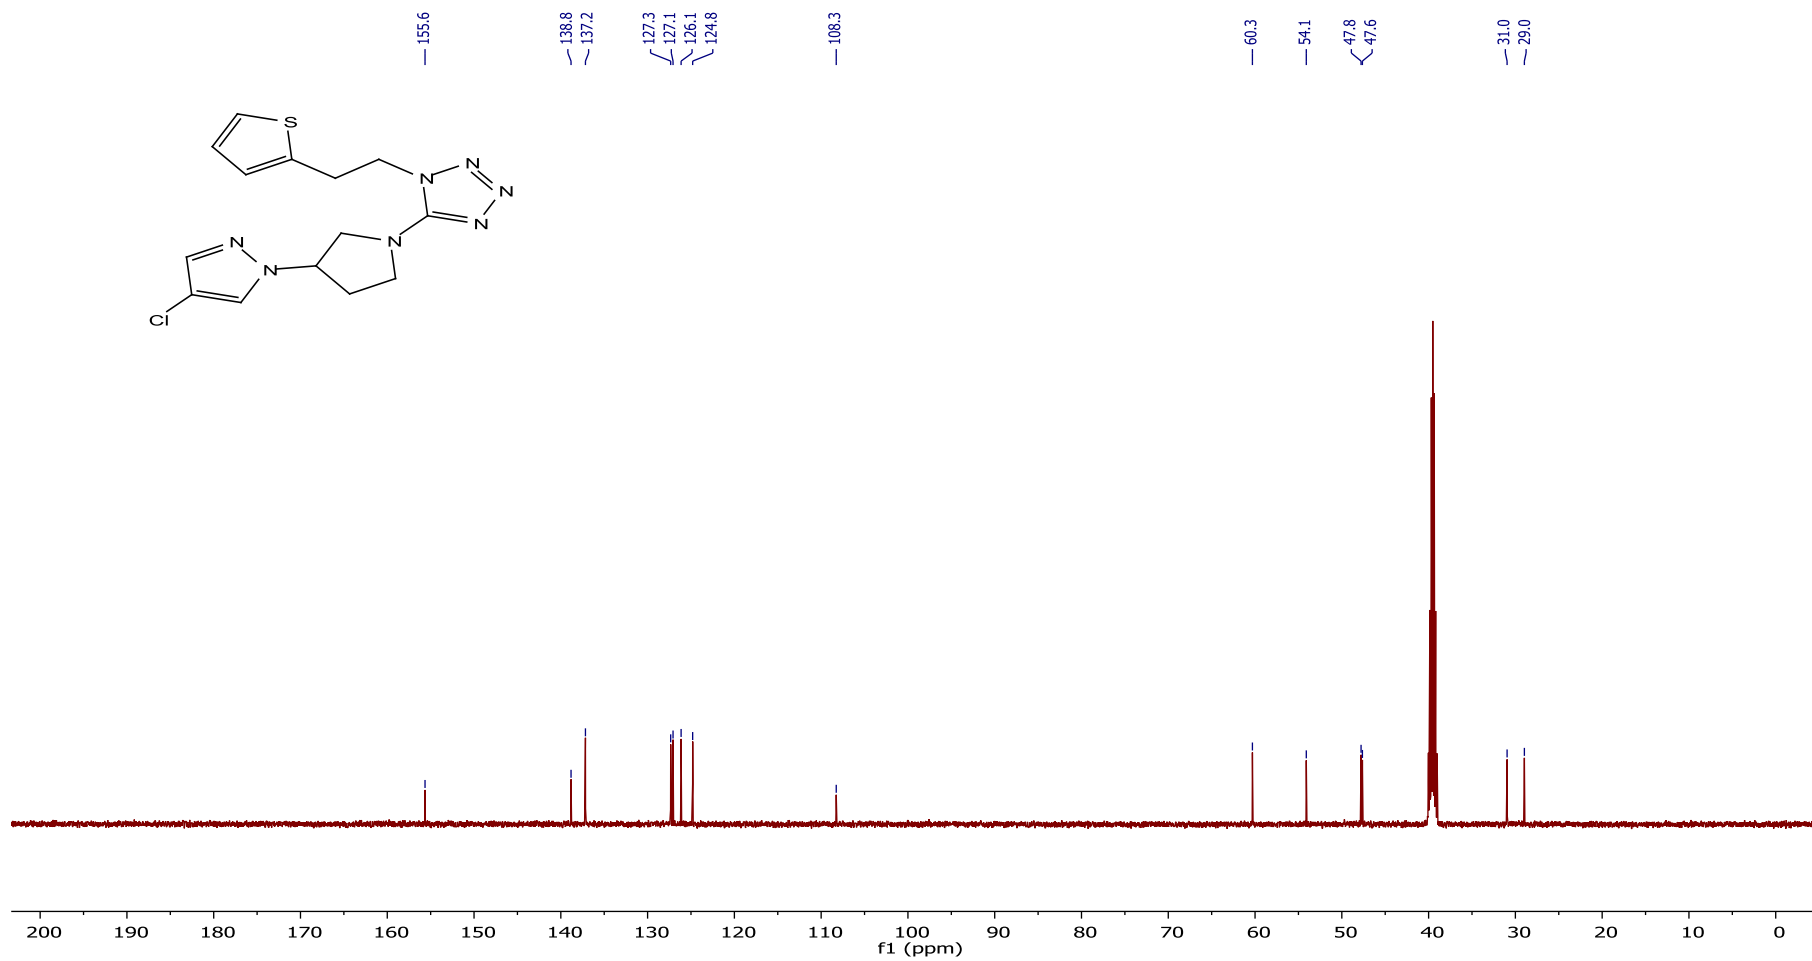

<sup>1</sup>H NMR spectrum of the compound **8**{41,148}.

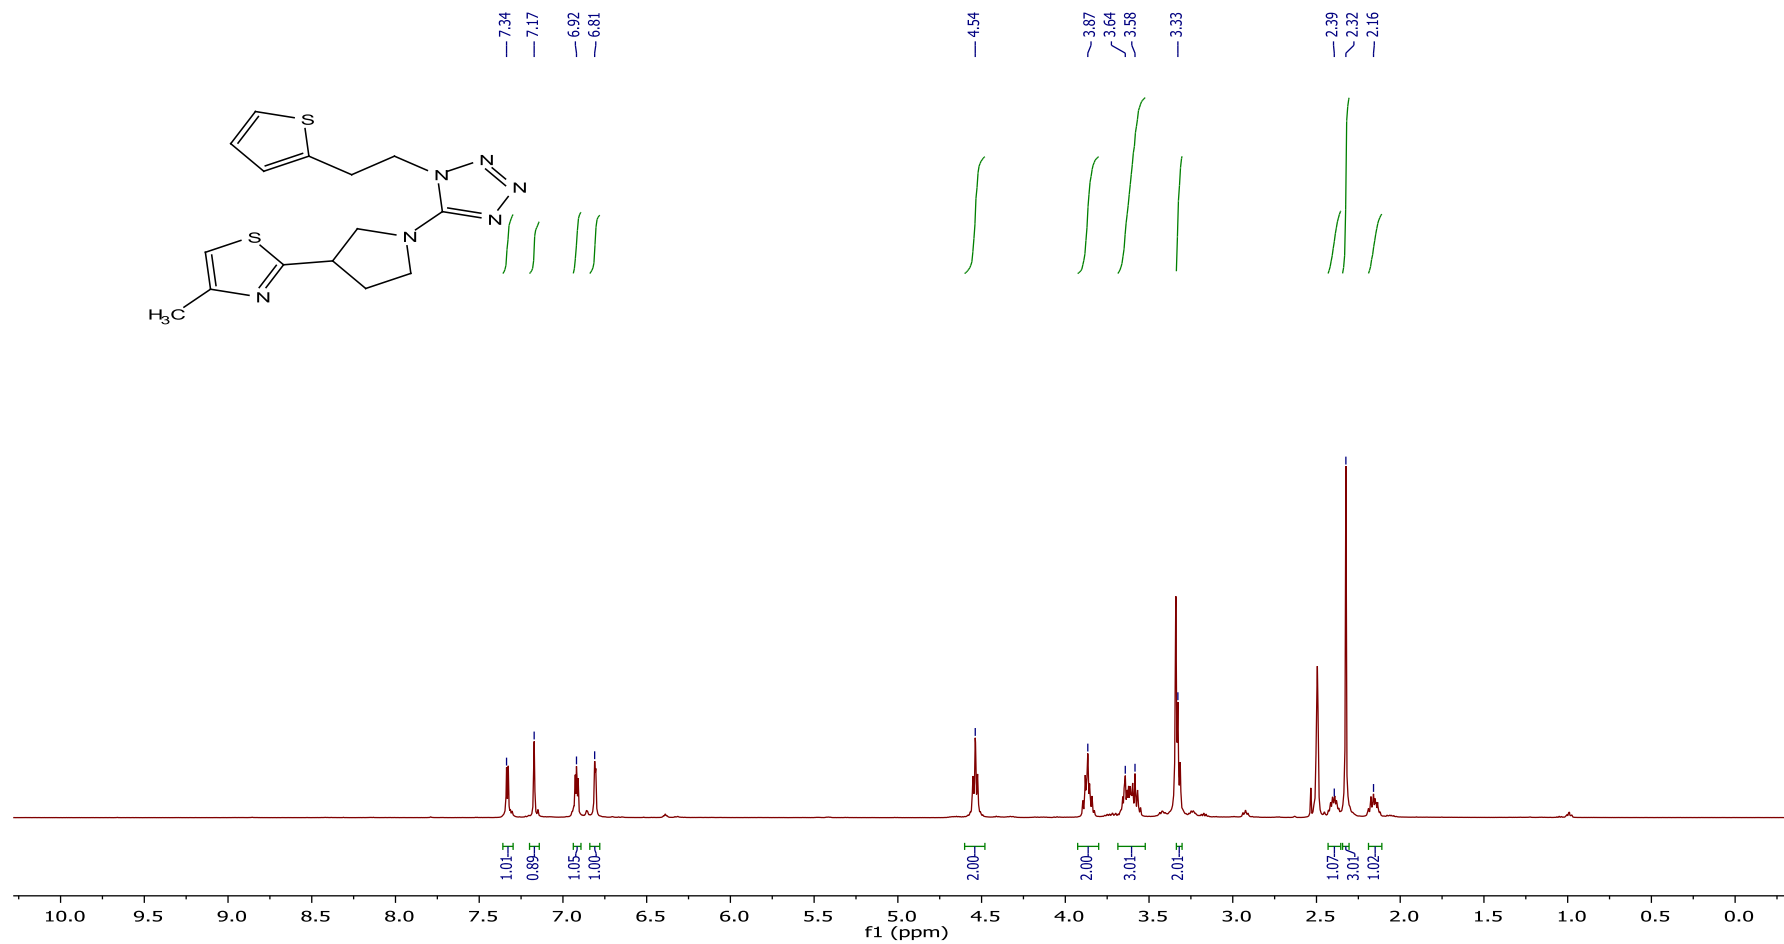

$^{13}\text{C}$  NMR spectrum of the compound **8**{41,148}.

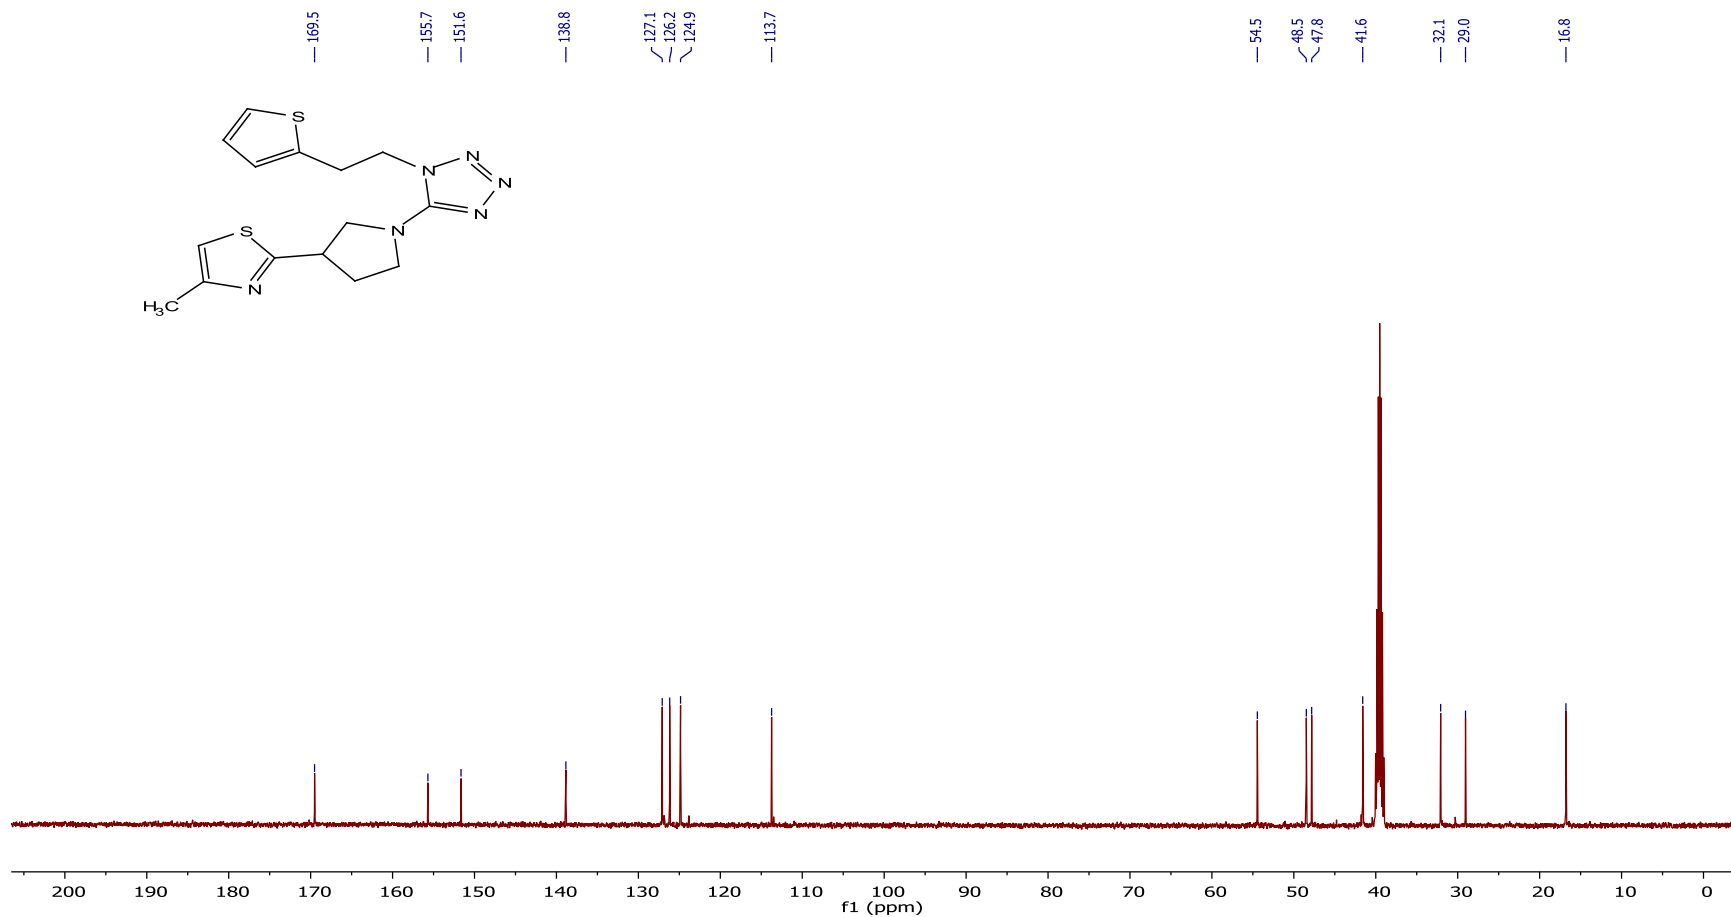

<sup>1</sup>H NMR spectrum of the compound **8**{41,210}.

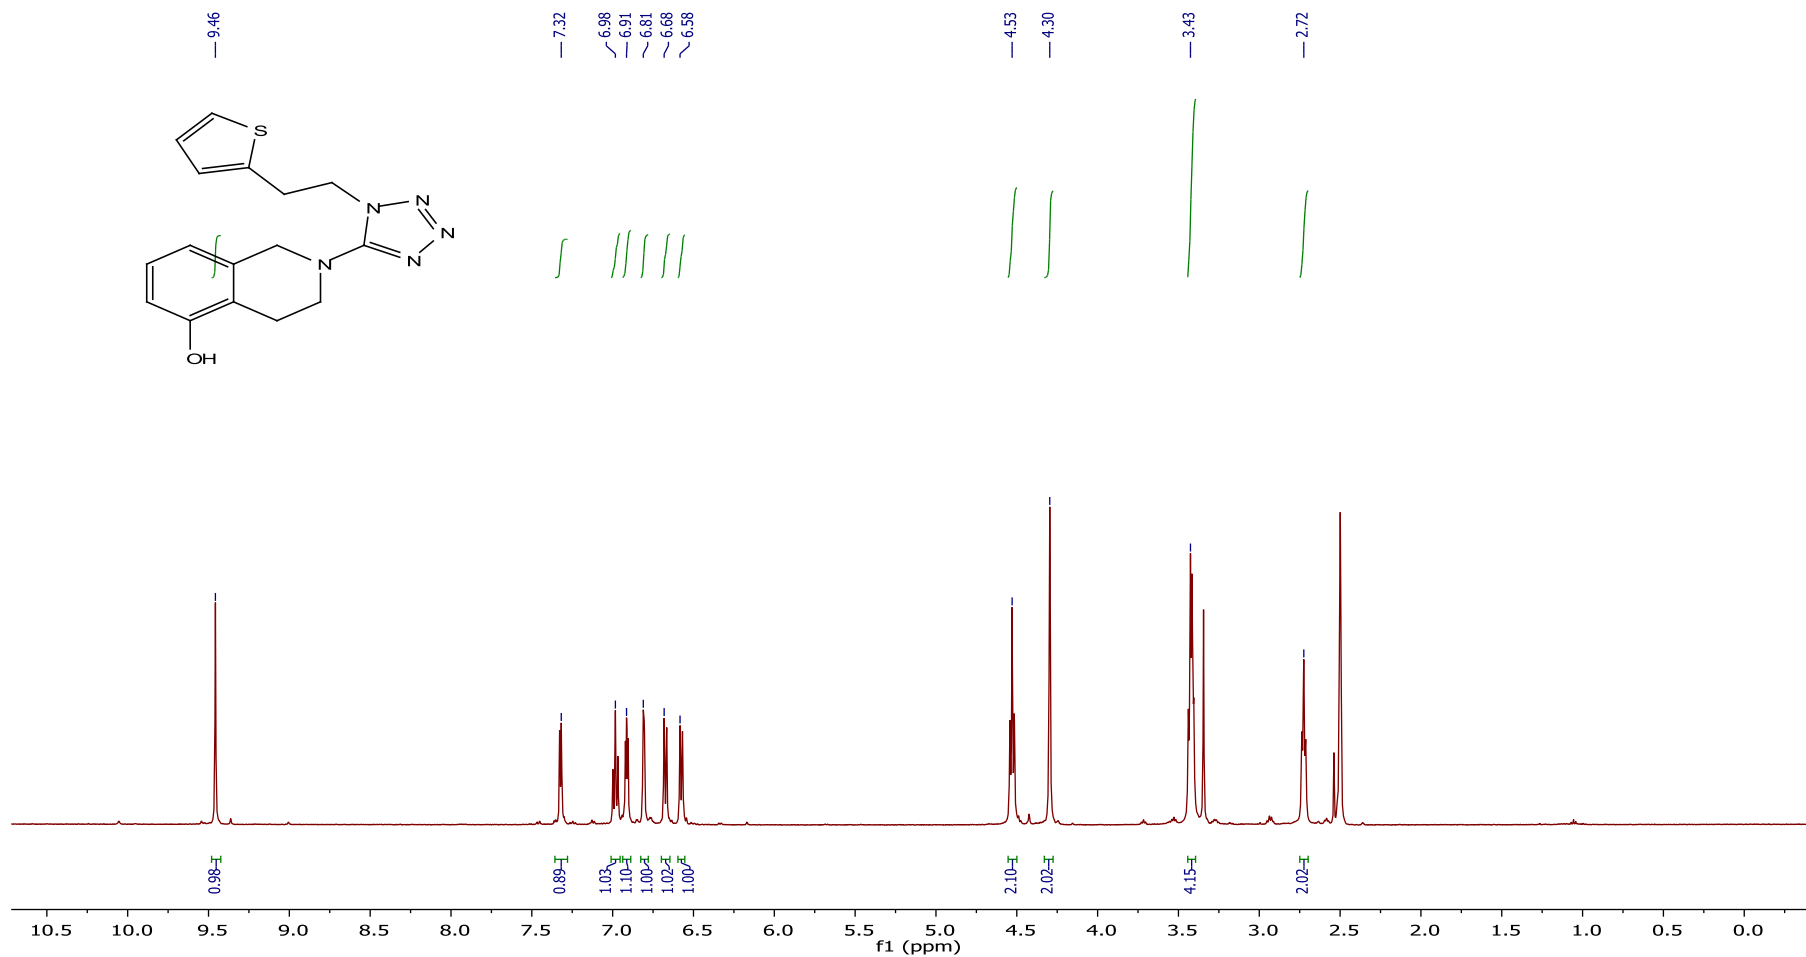

$^{13}\text{C}$  NMR spectrum of the compound **8**{41,210}.

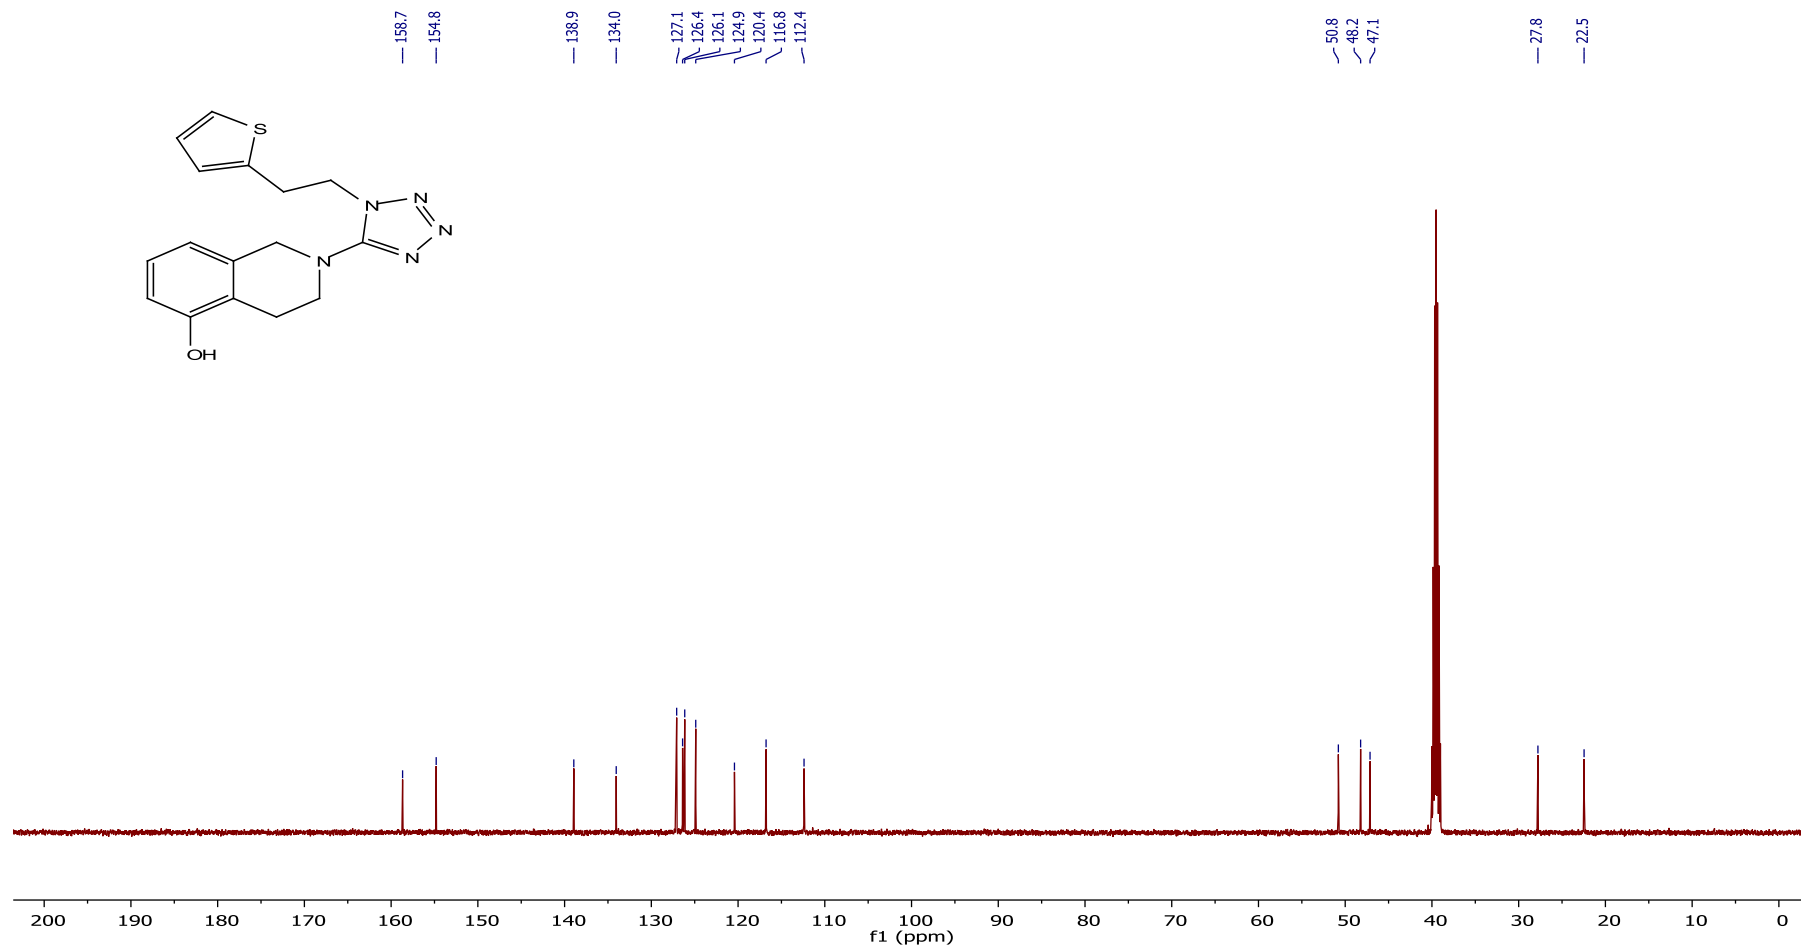

<sup>1</sup>H NMR spectrum of the compound **8**{41,211}.

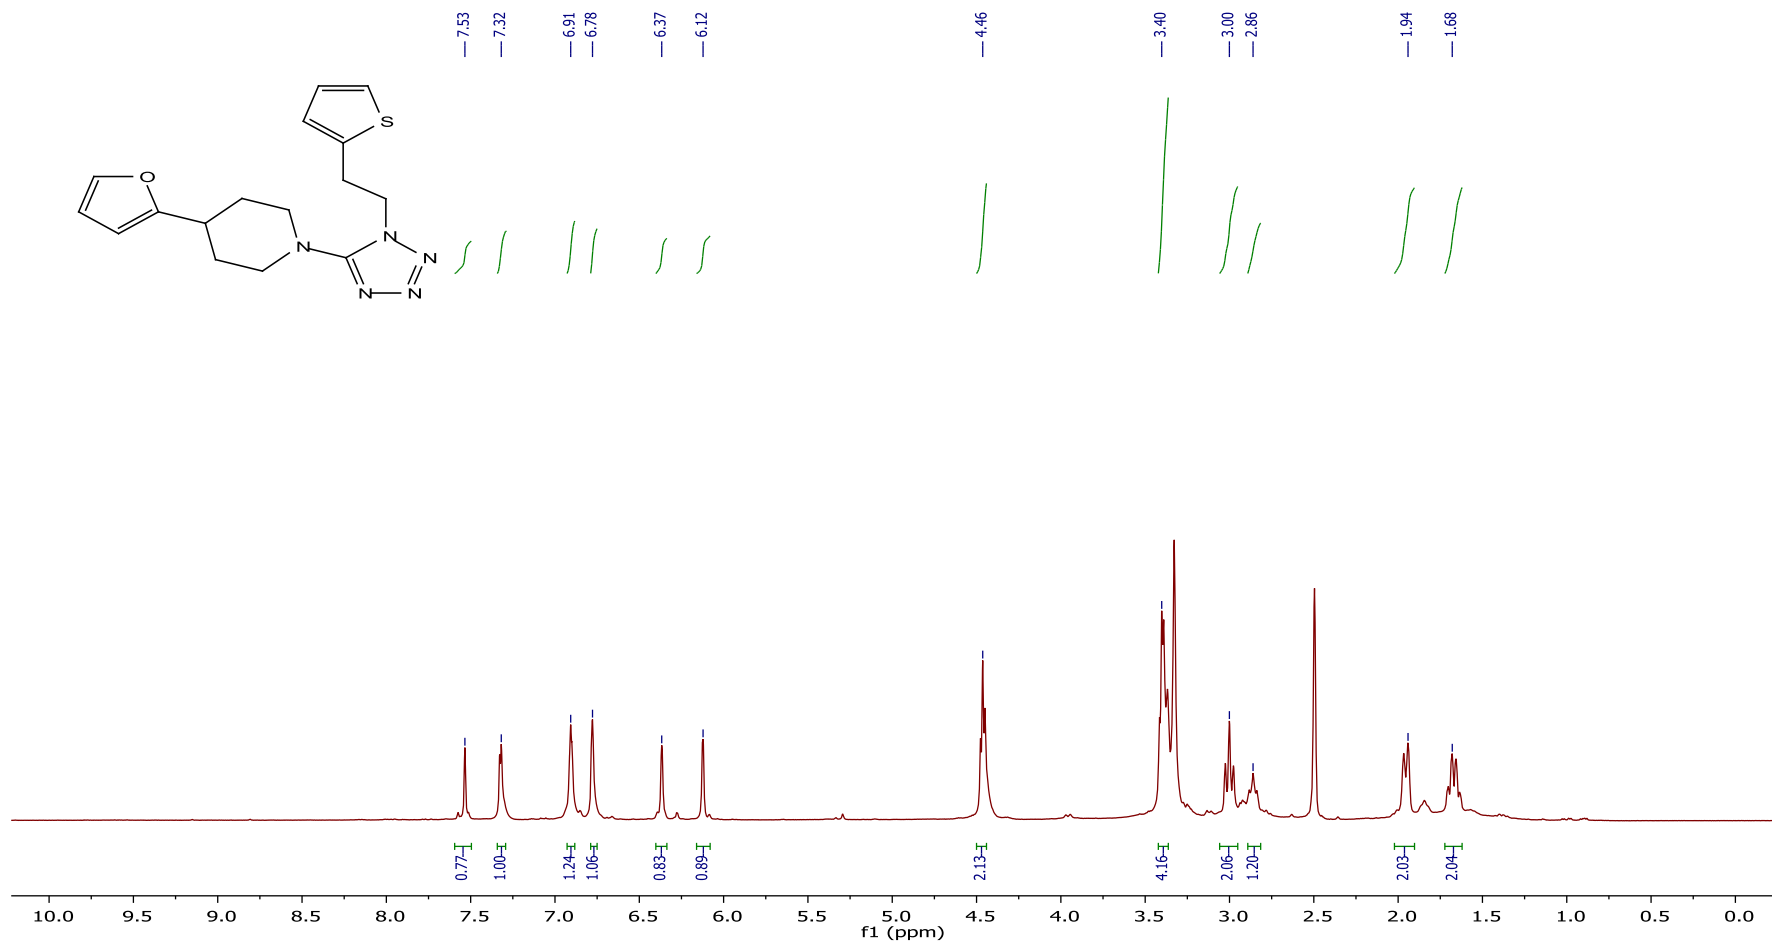

$^{13}\text{C}$  NMR spectrum of the compound **8**{41,211}.

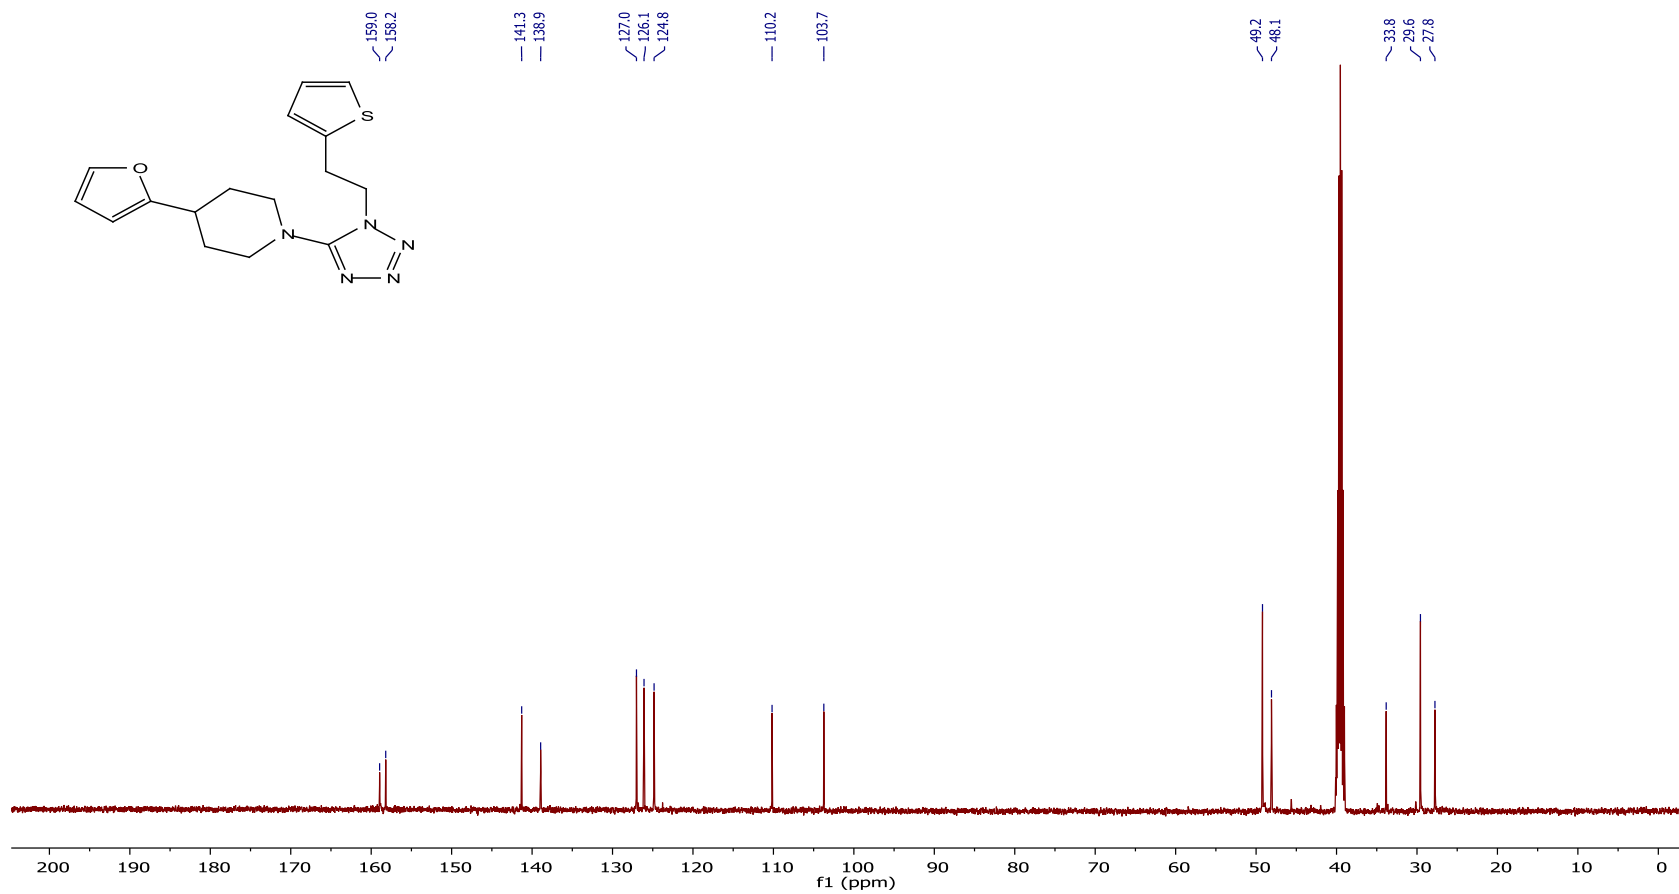

<sup>1</sup>H NMR spectrum of the compound **8**{41,212}.

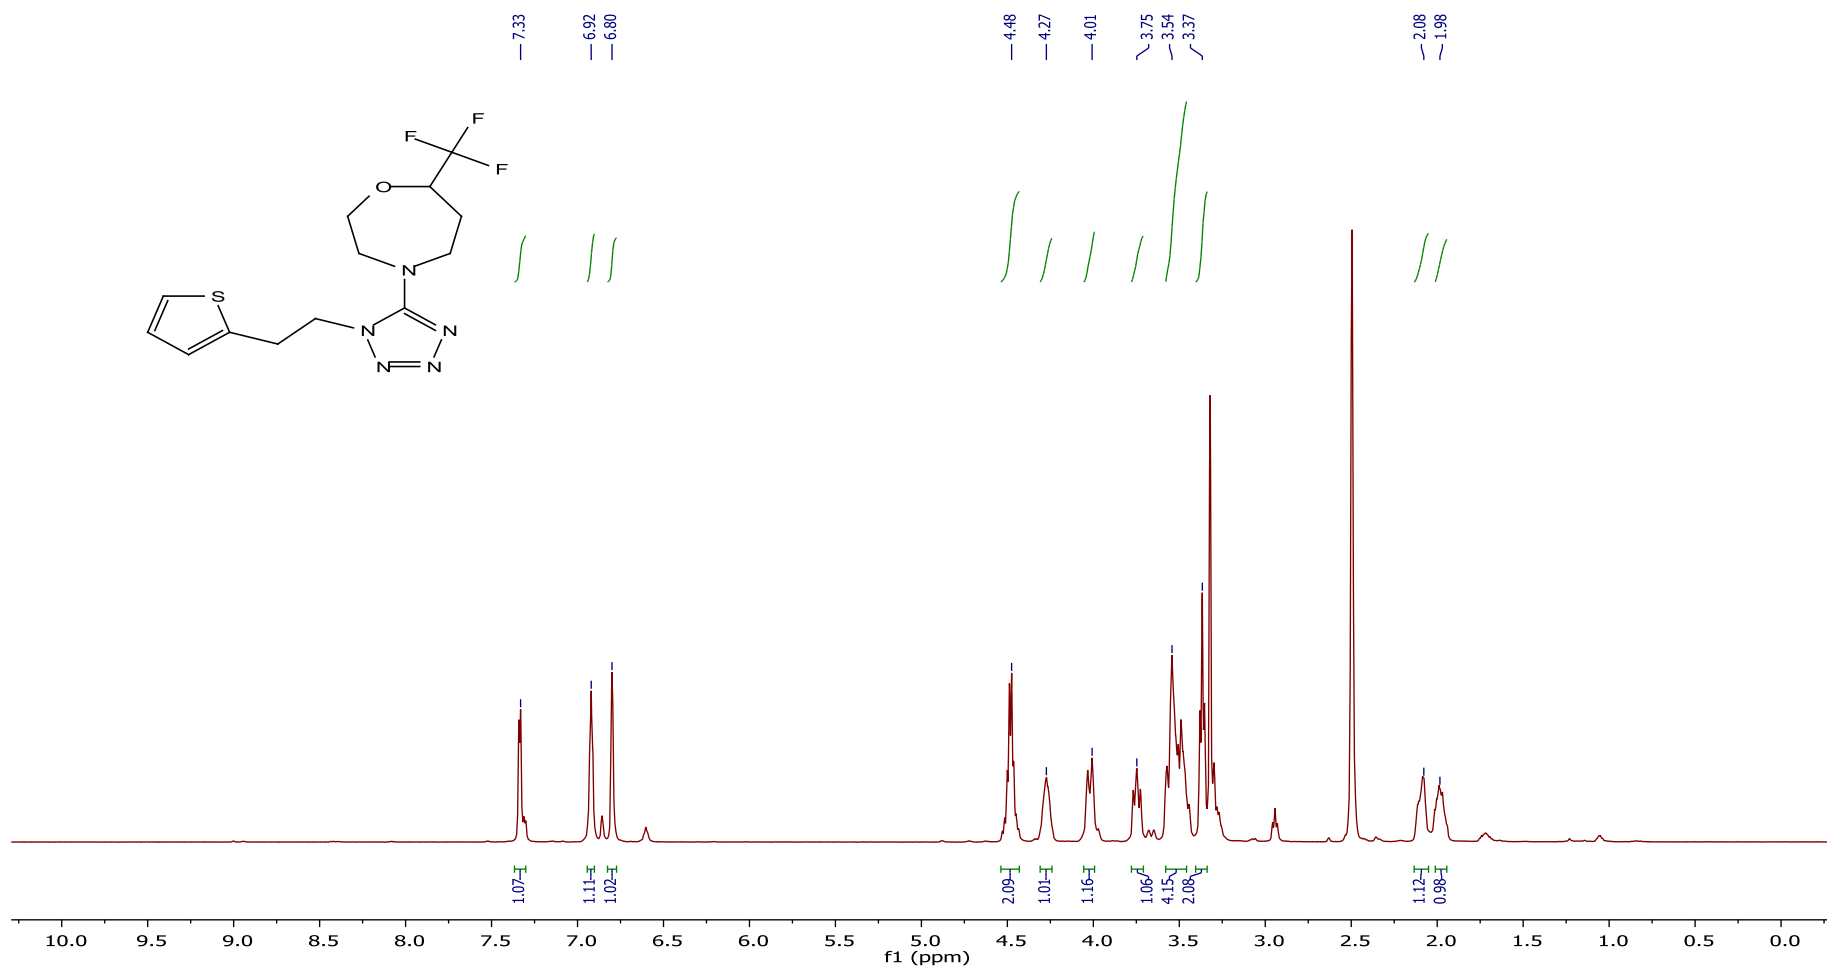



$^{13}\text{C}$  NMR spectrum of the compound **8**{41,212}.

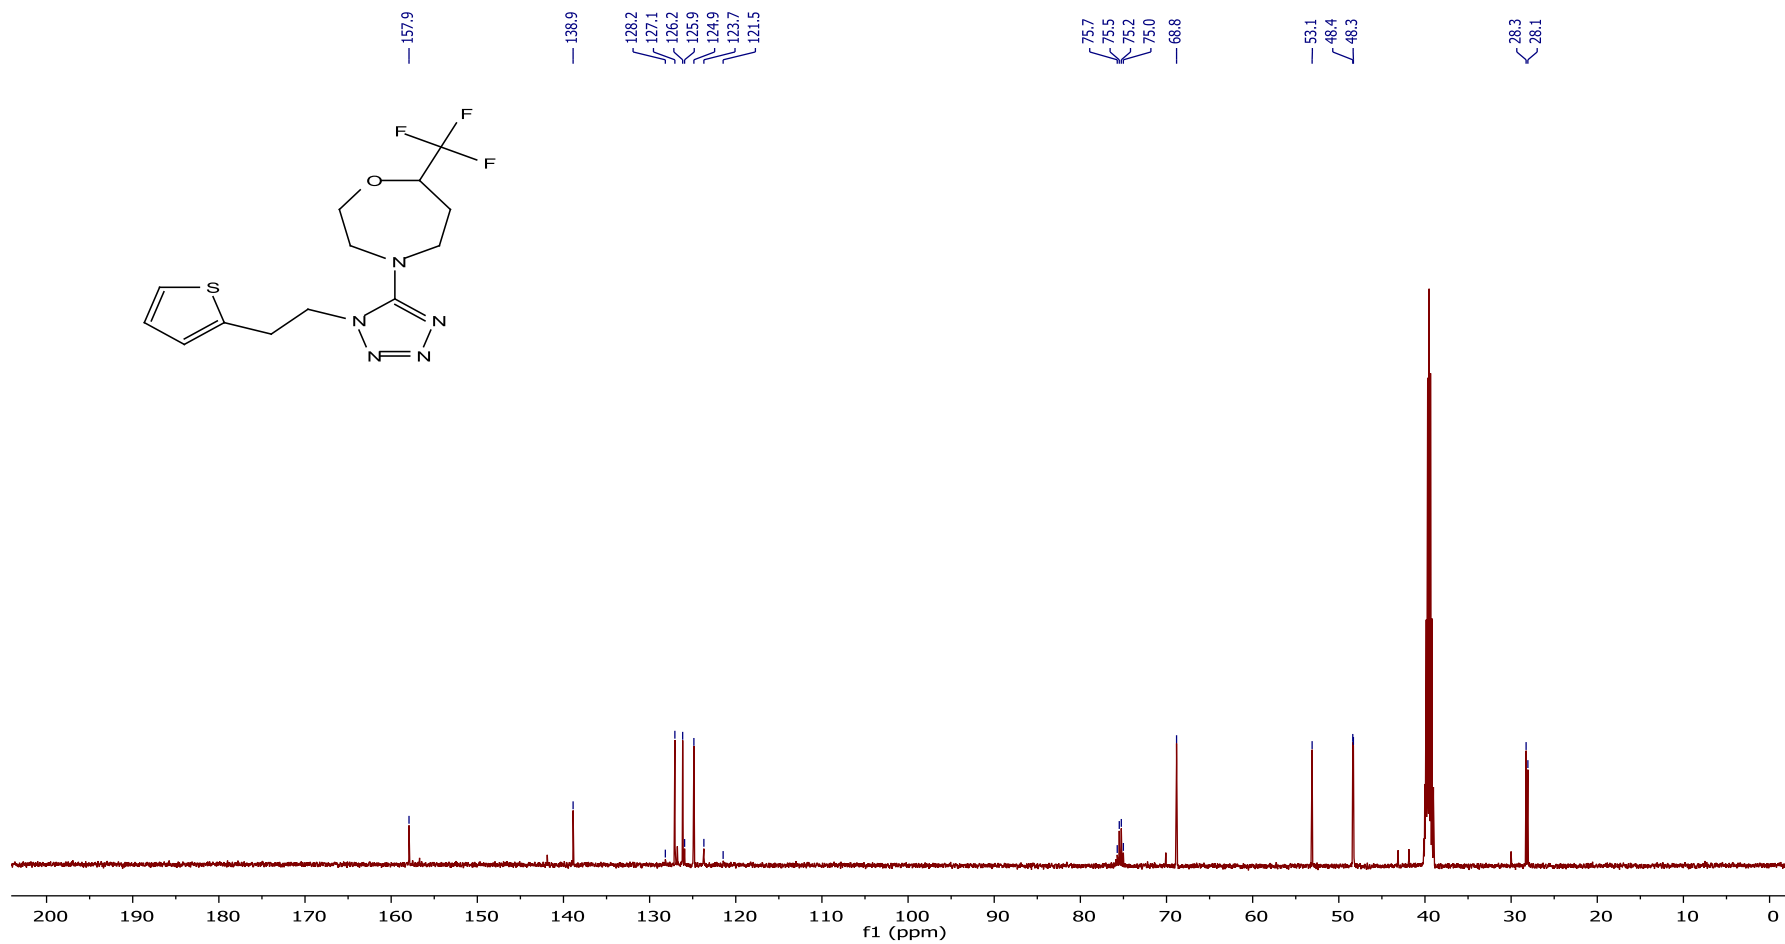

$^{19}\text{F}$  NMR spectrum of the compound **8**{41,212}.

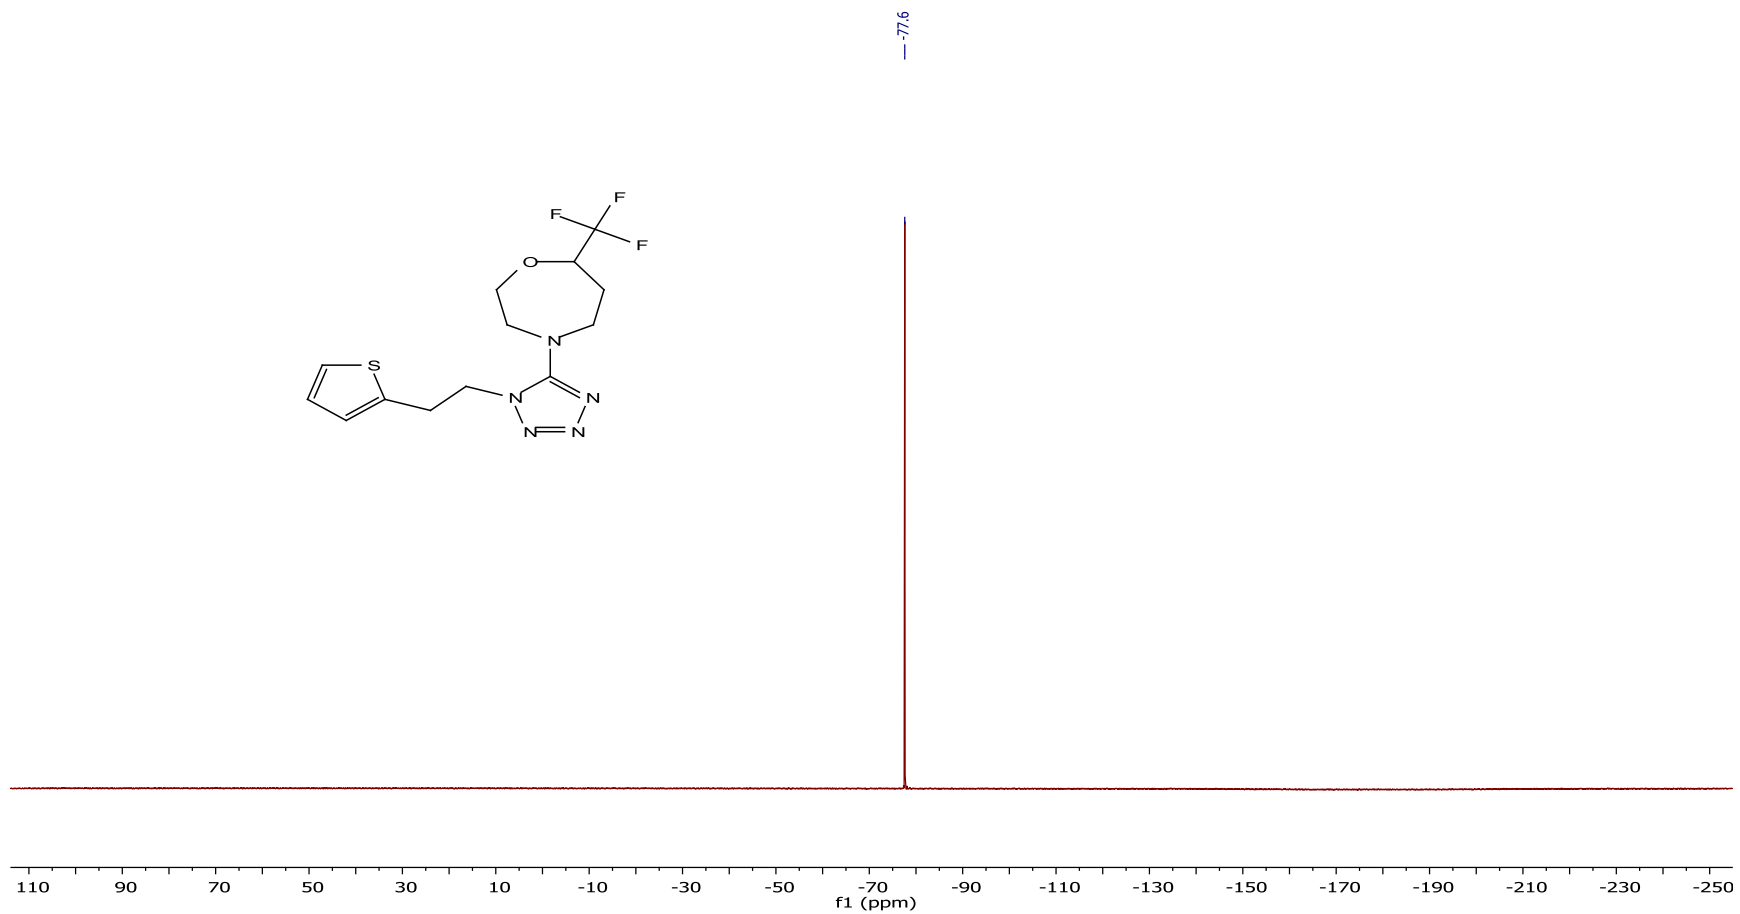

<sup>1</sup>H NMR spectrum of the compound **8**{42,193}.

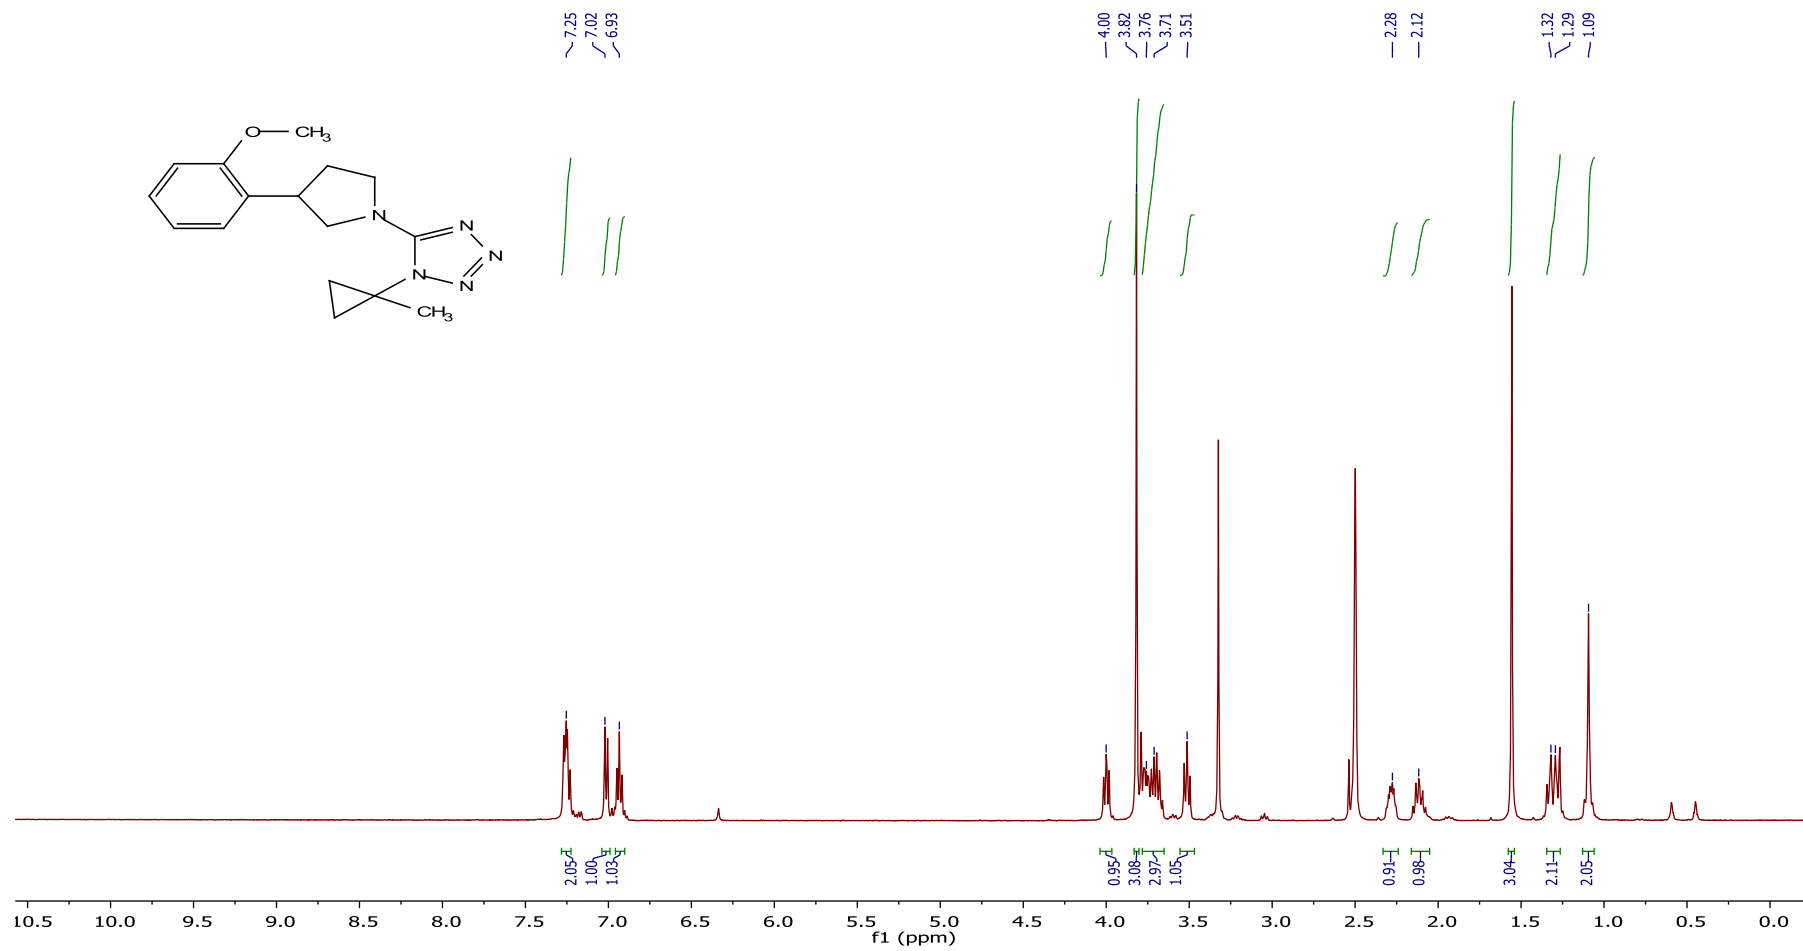

$^{13}\text{C}$  NMR spectrum of the compound **8**{42,193}.

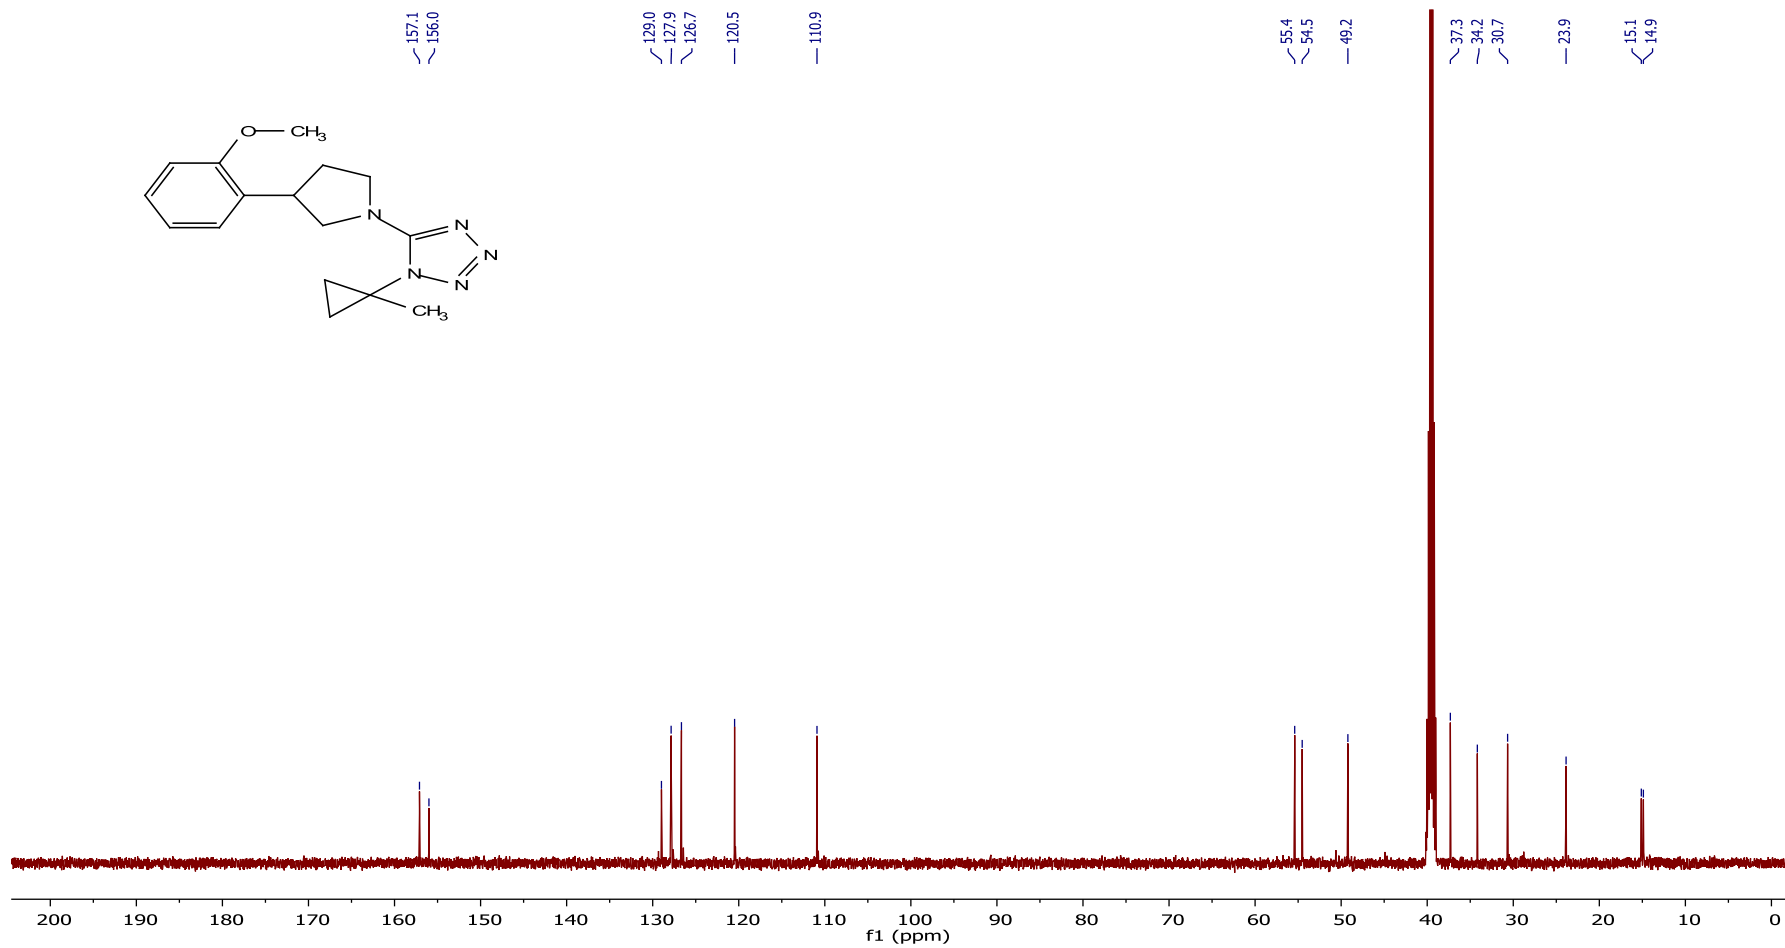

$^1\text{H}$  NMR spectrum of the compound **8**{42,227}.

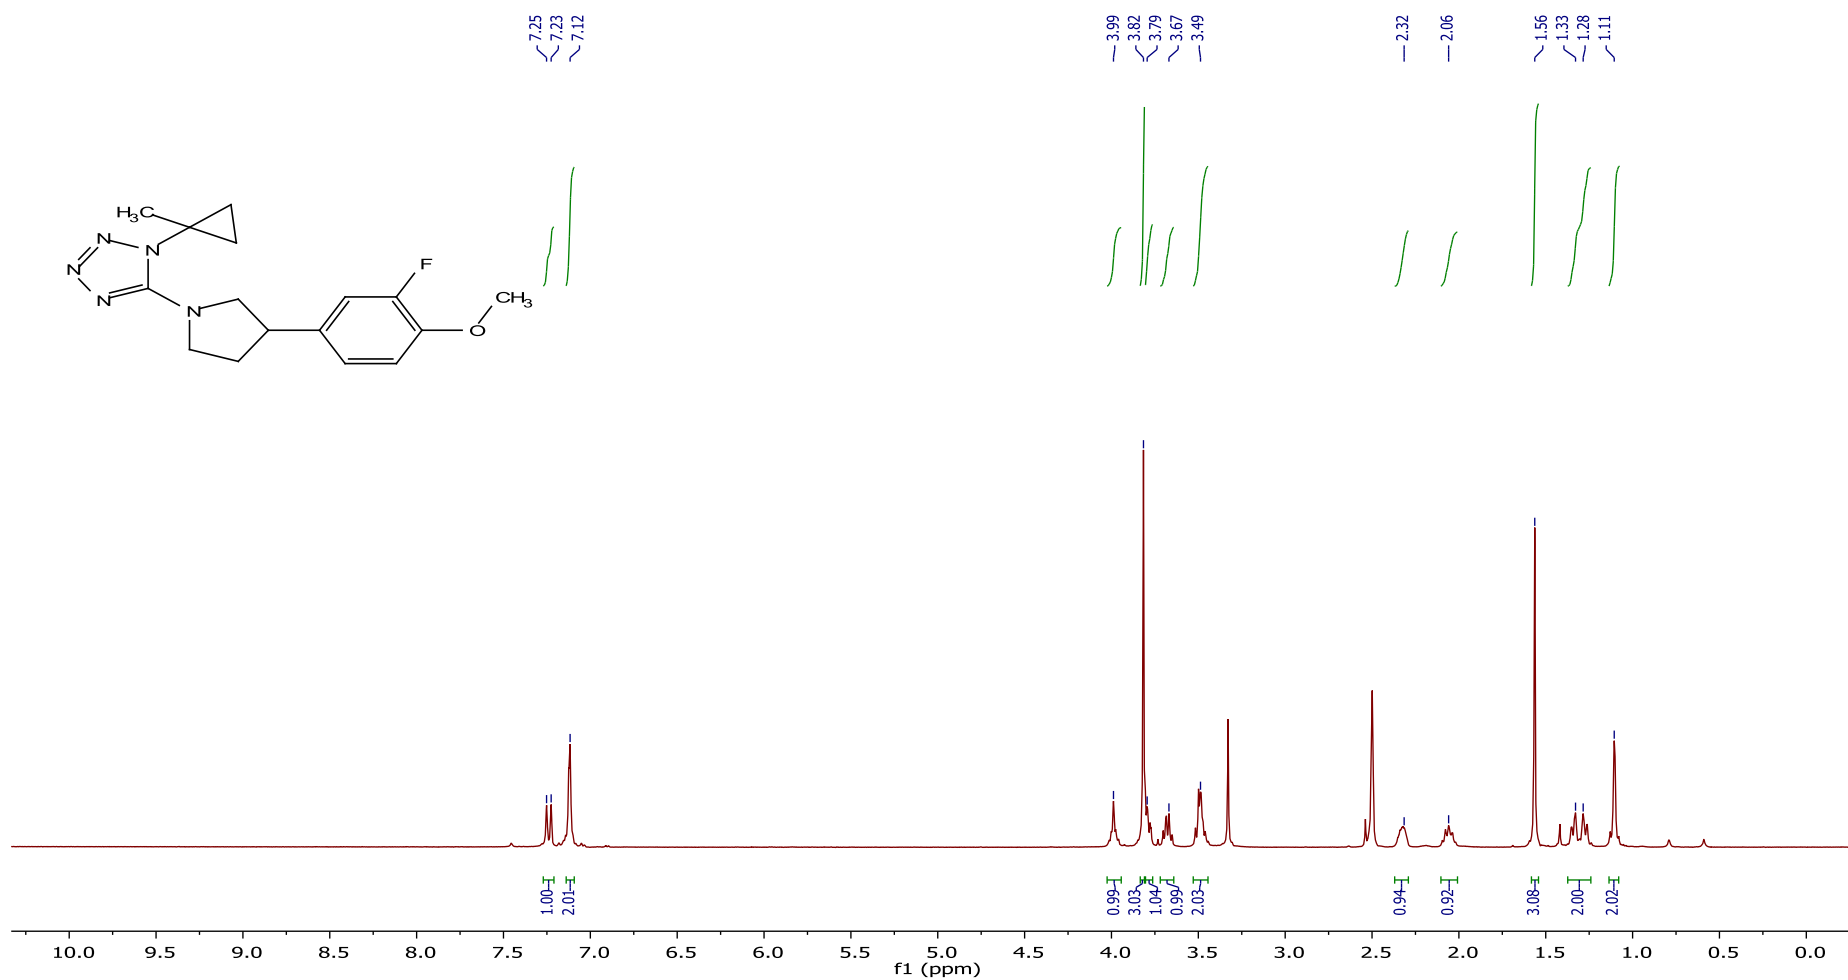

$^{13}\text{C}$  NMR spectrum of the compound **8**{42,227}.

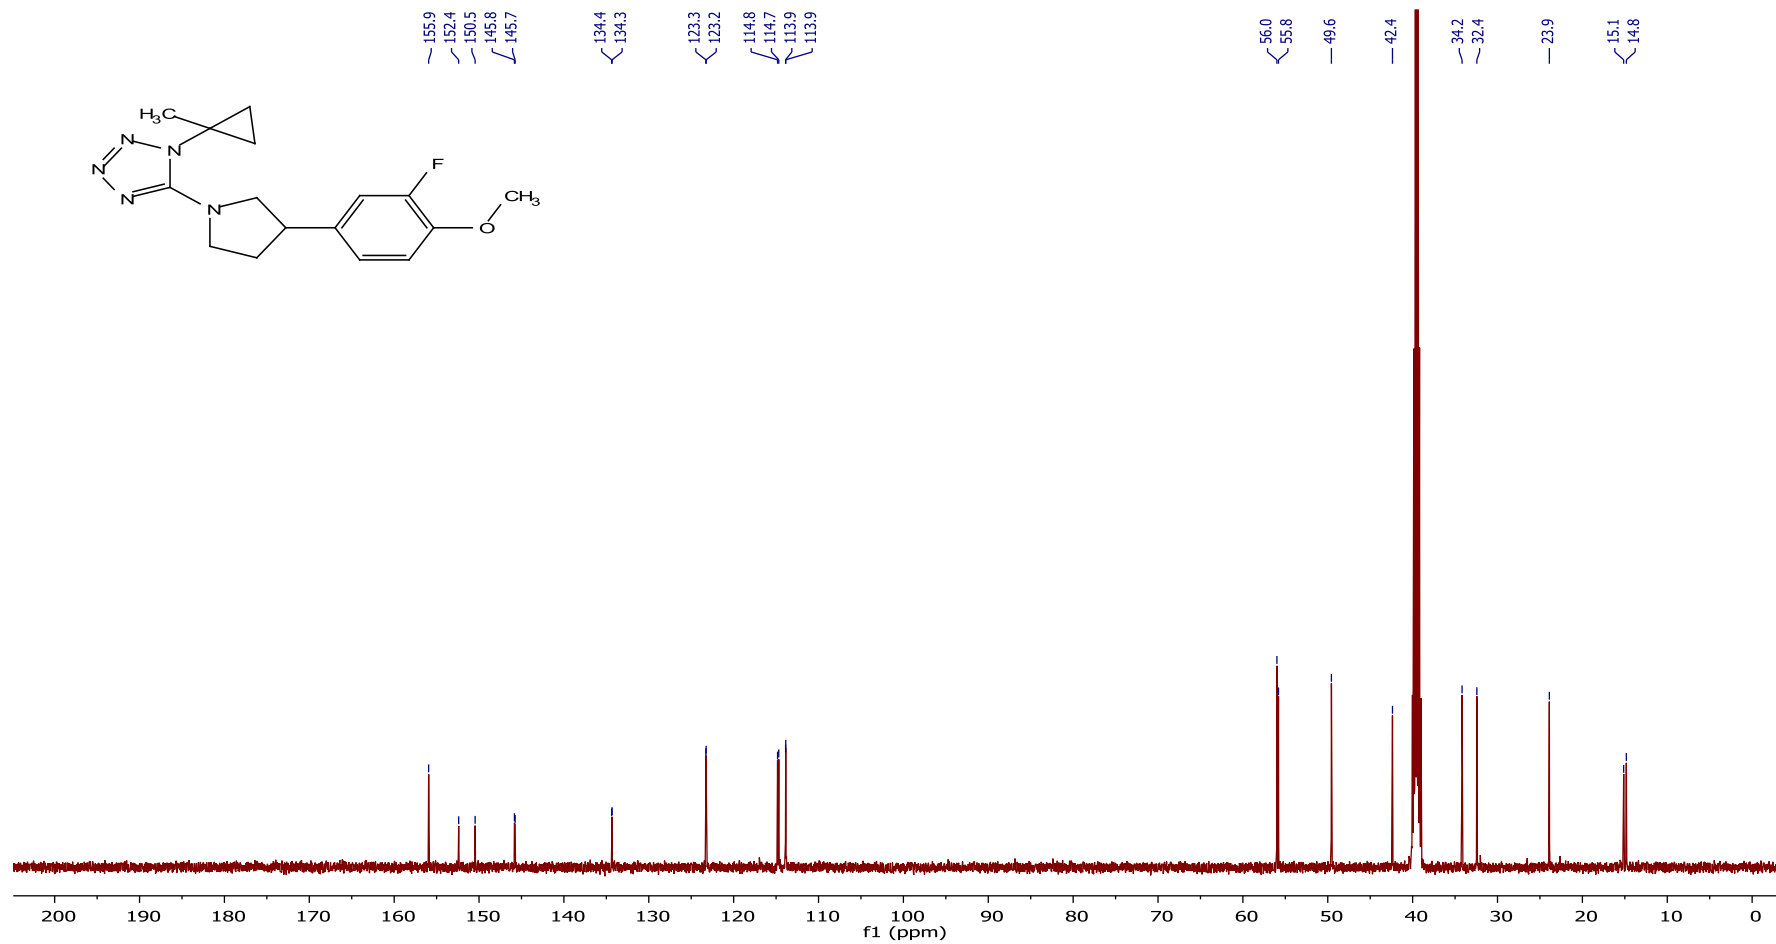

$^{19}\text{F}$  NMR spectrum of the compound **8**{42,227}.

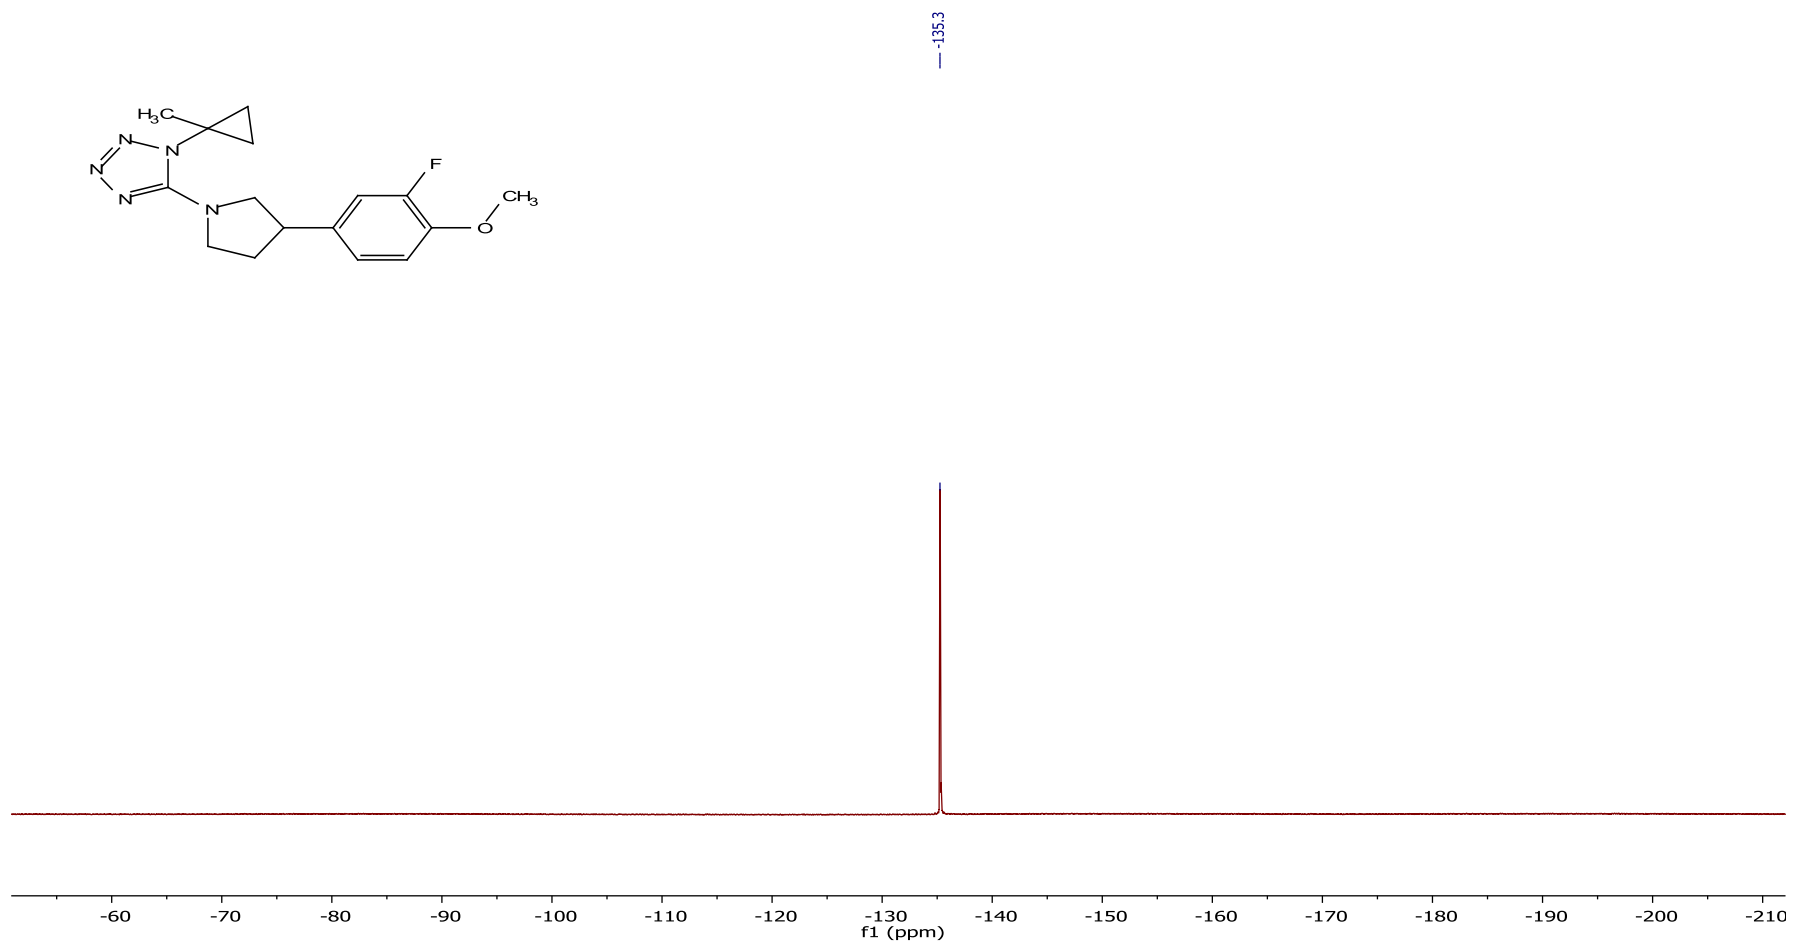

<sup>1</sup>H NMR spectrum of the compound **8**{51,251}.

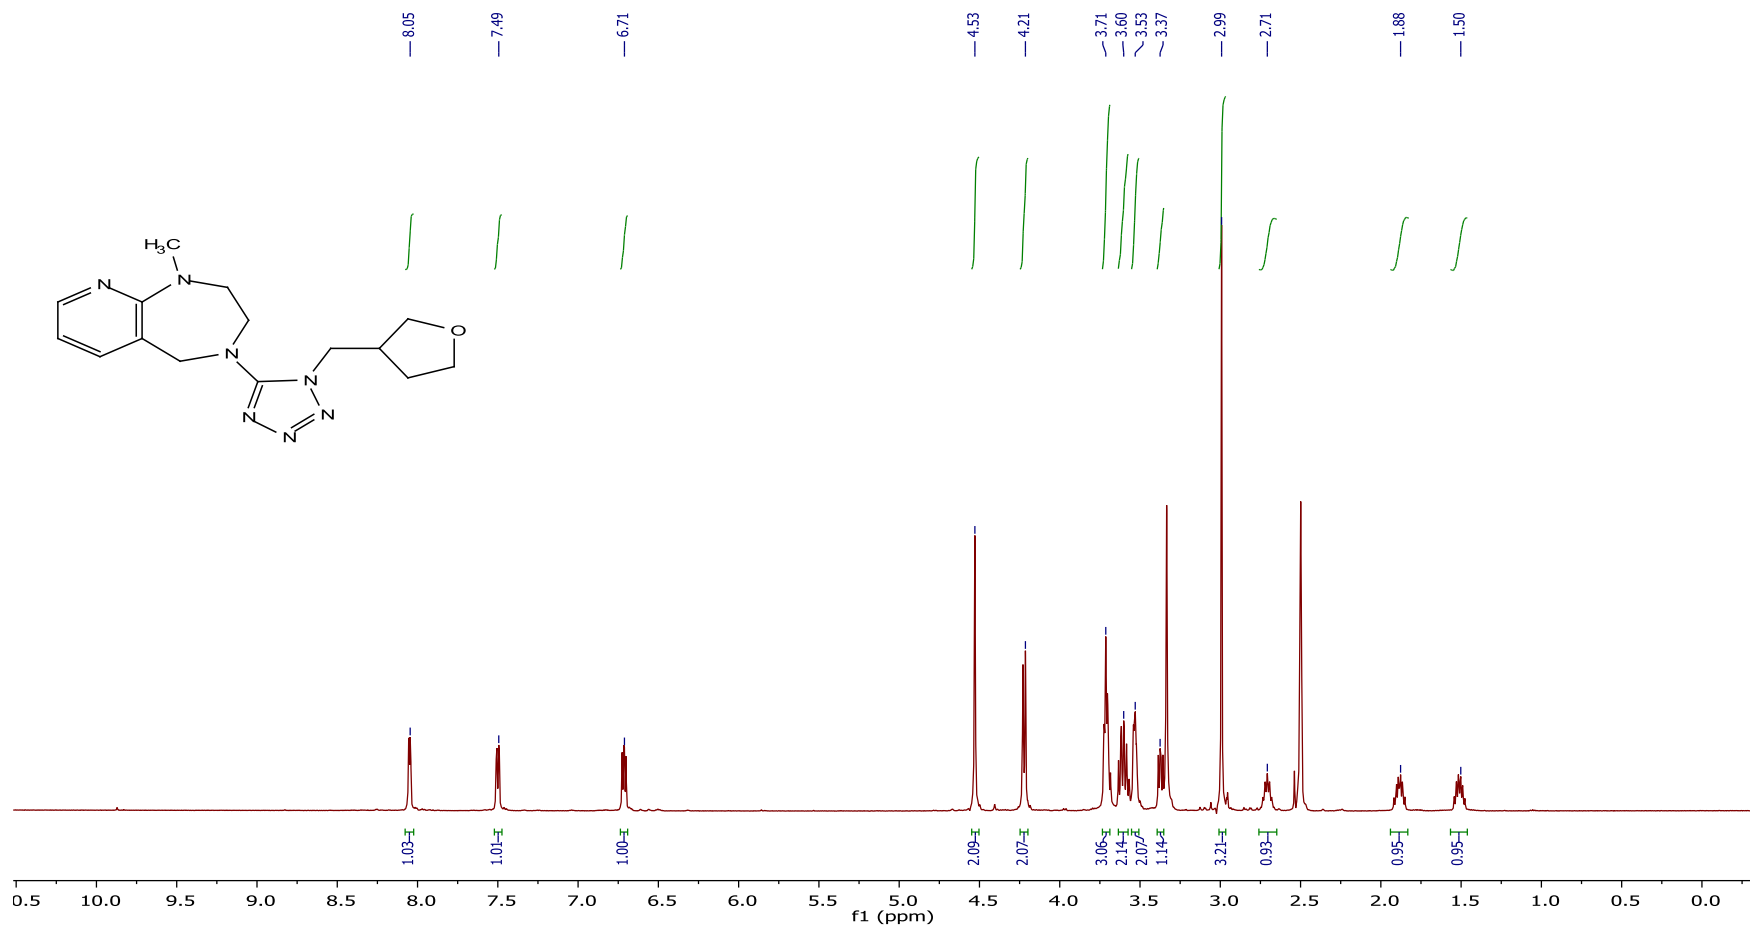



$^{13}\text{C}$  NMR spectrum of the compound **8**{51,251}.

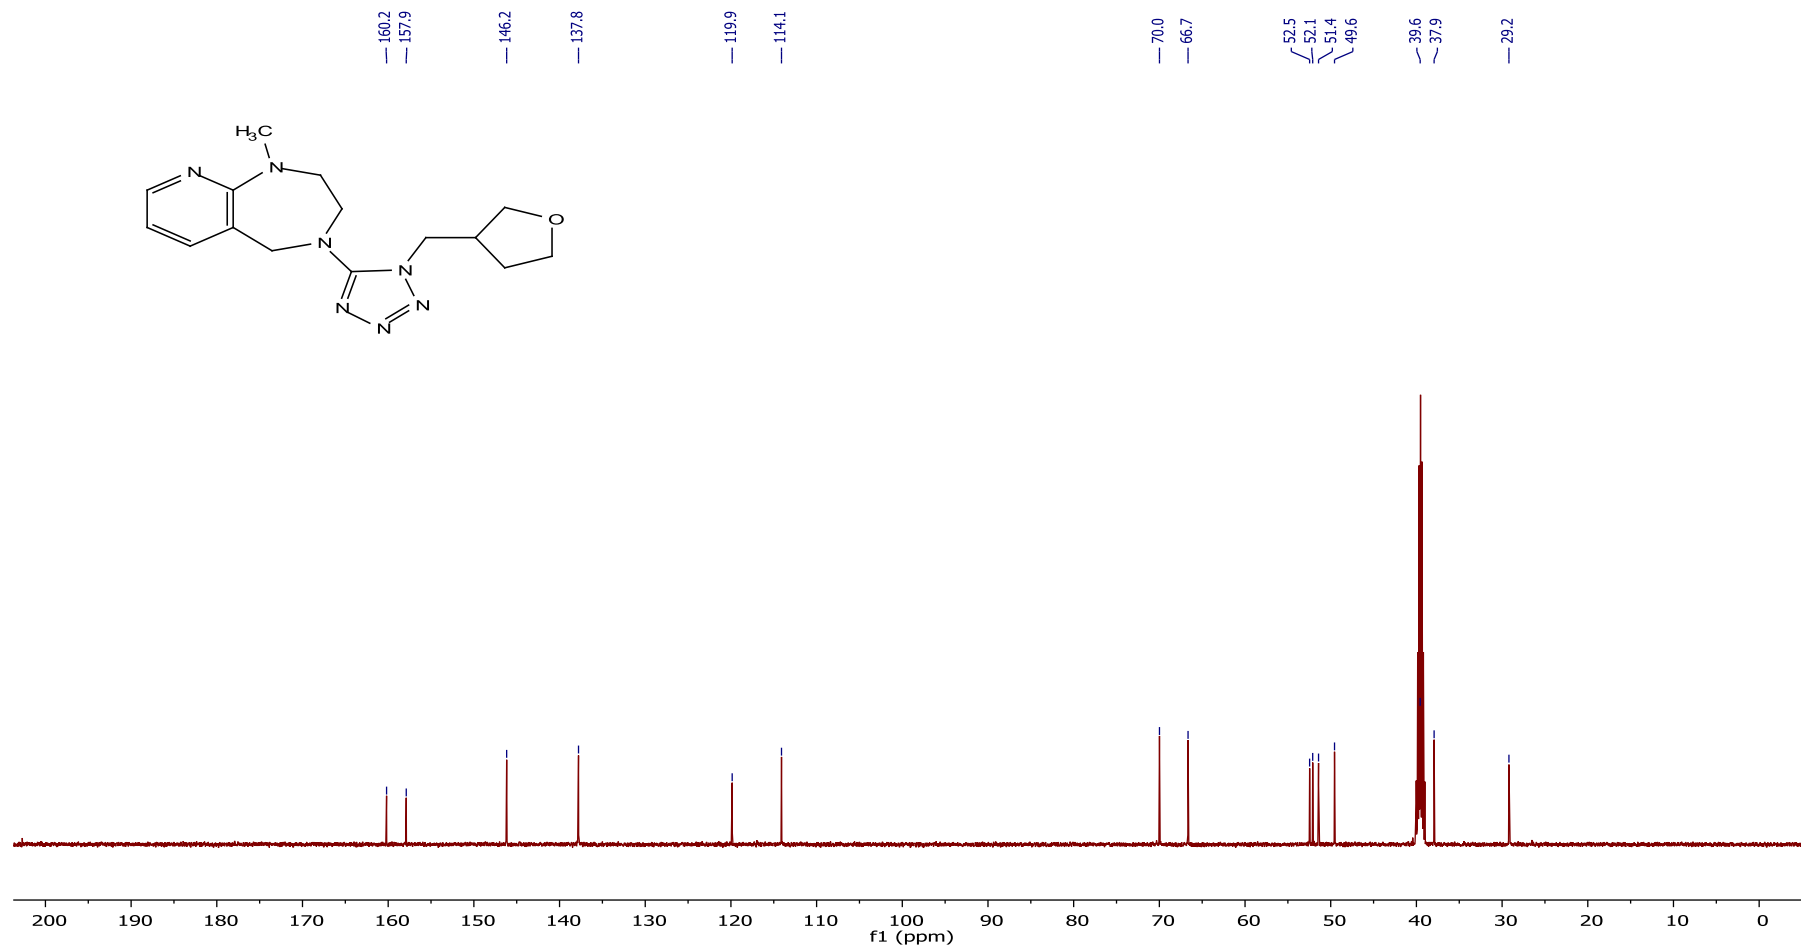

<sup>1</sup>H NMR spectrum of the compound **8**{53,236}.

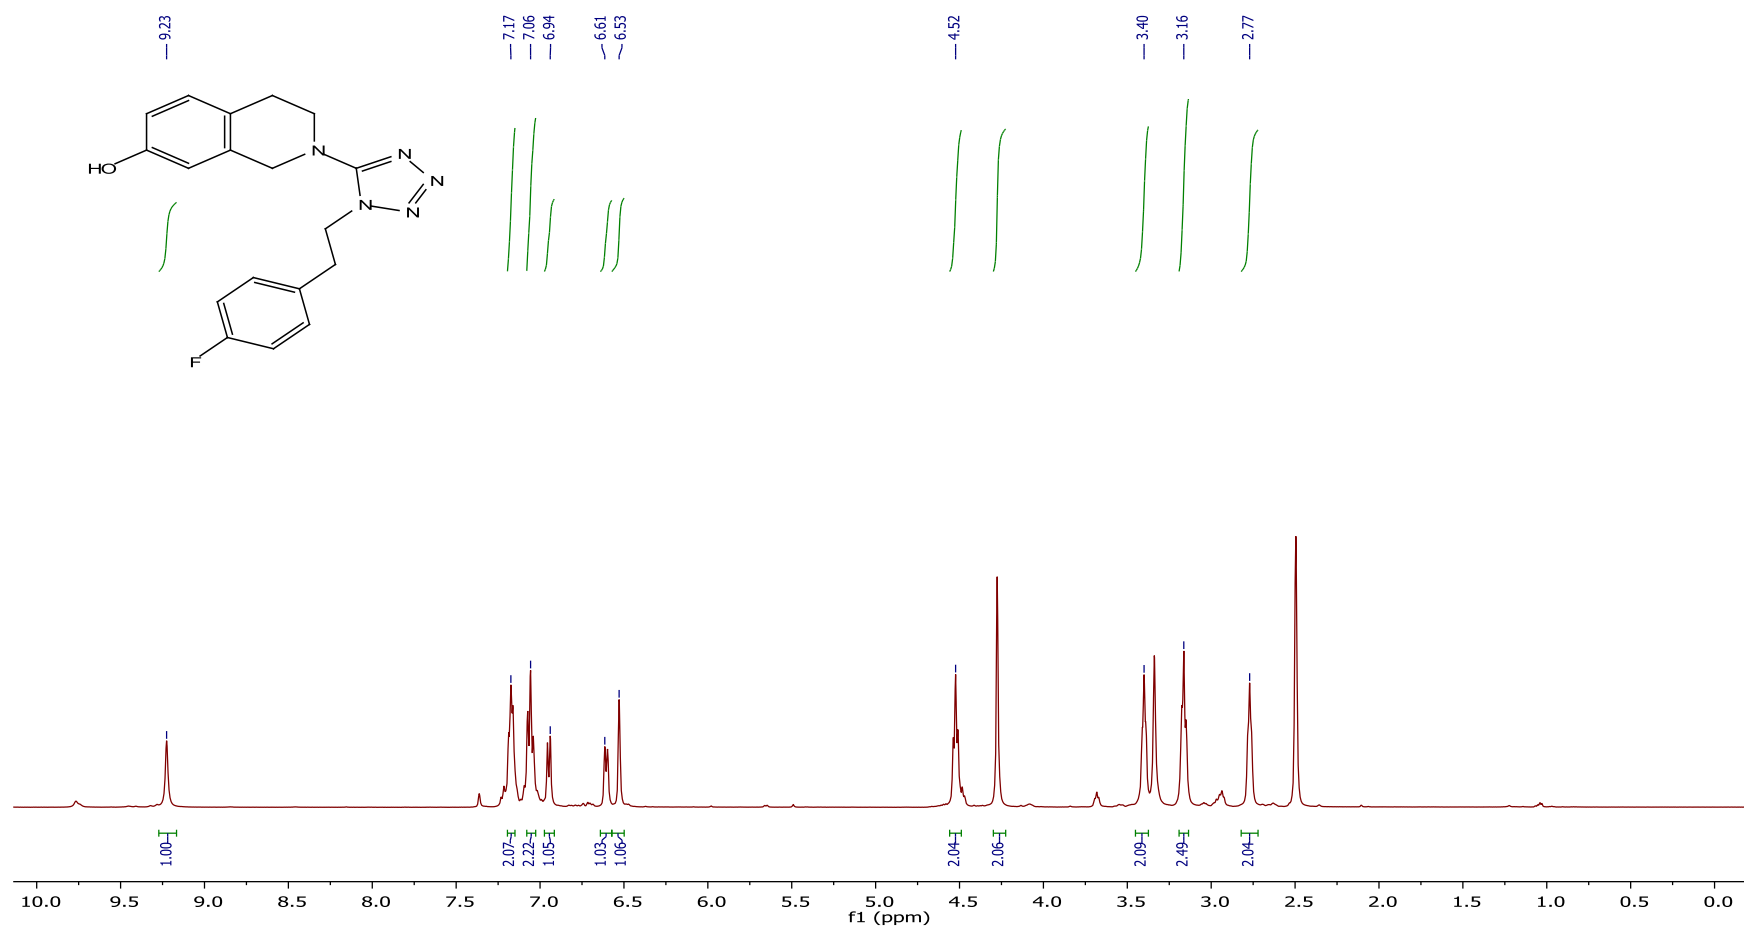

$^{13}\text{C}$  NMR spectrum of the compound **8**{53,236}.

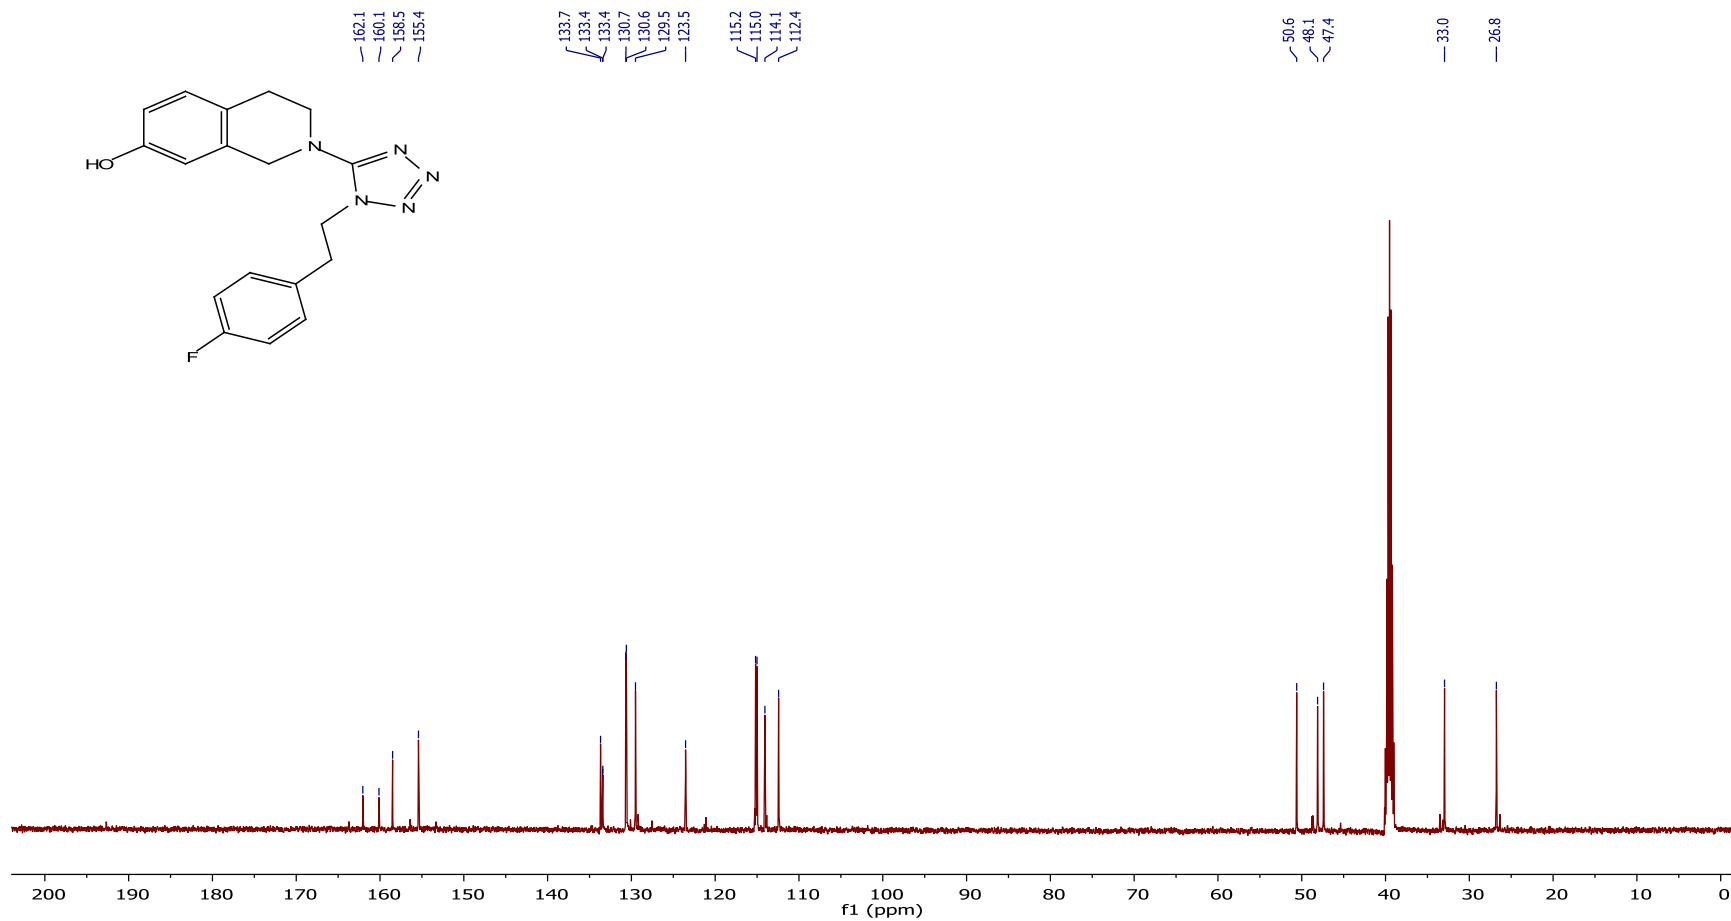

$^{19}\text{F}$  NMR spectrum of the compound **8**{53,236}.

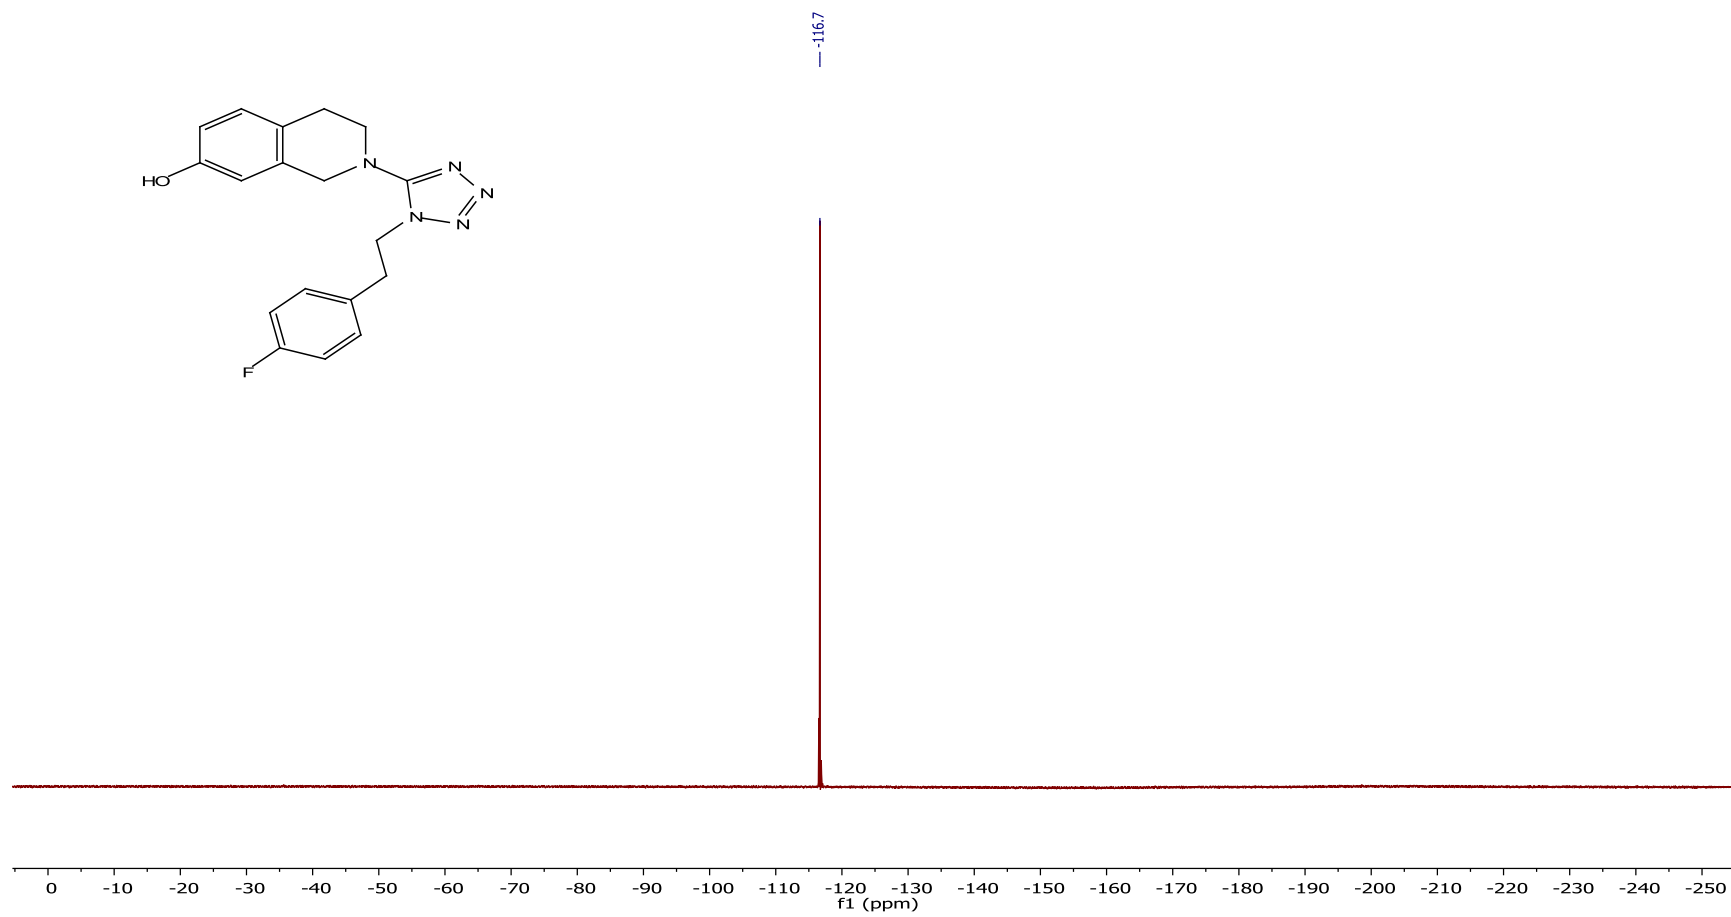

<sup>1</sup>H NMR spectrum of the compound **8**{56,108}.

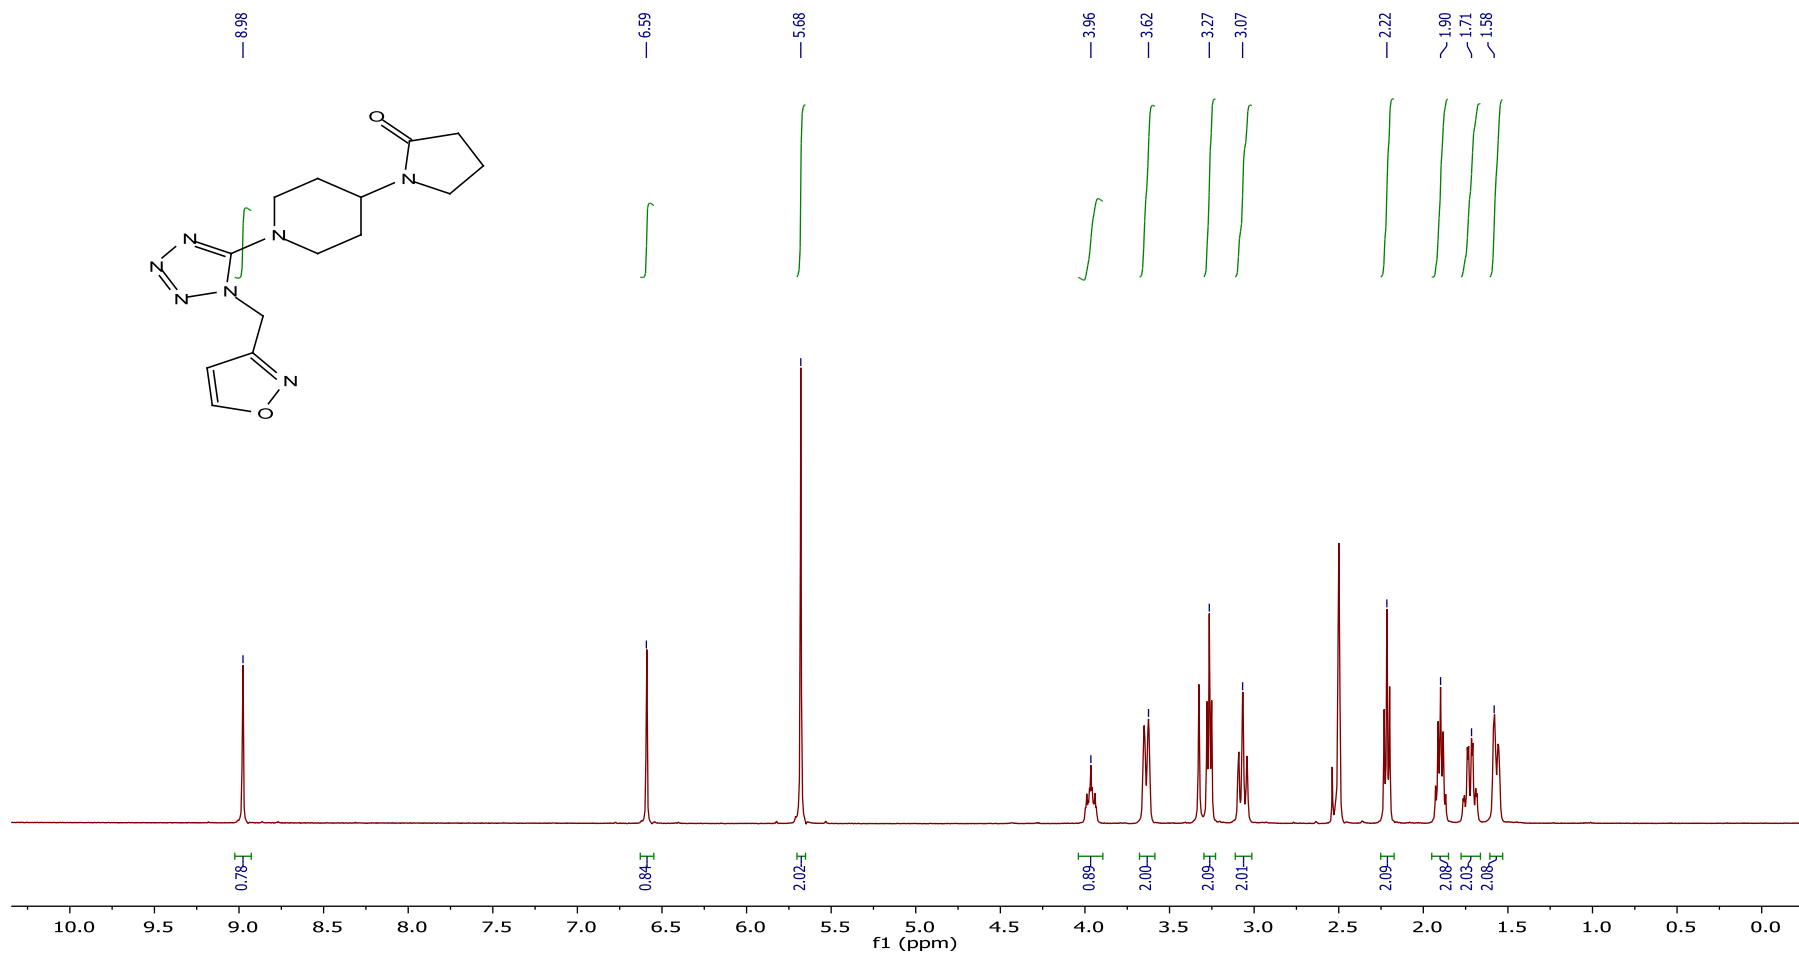

$^{13}\text{C}$  NMR spectrum of the compound **8**{56,108}.

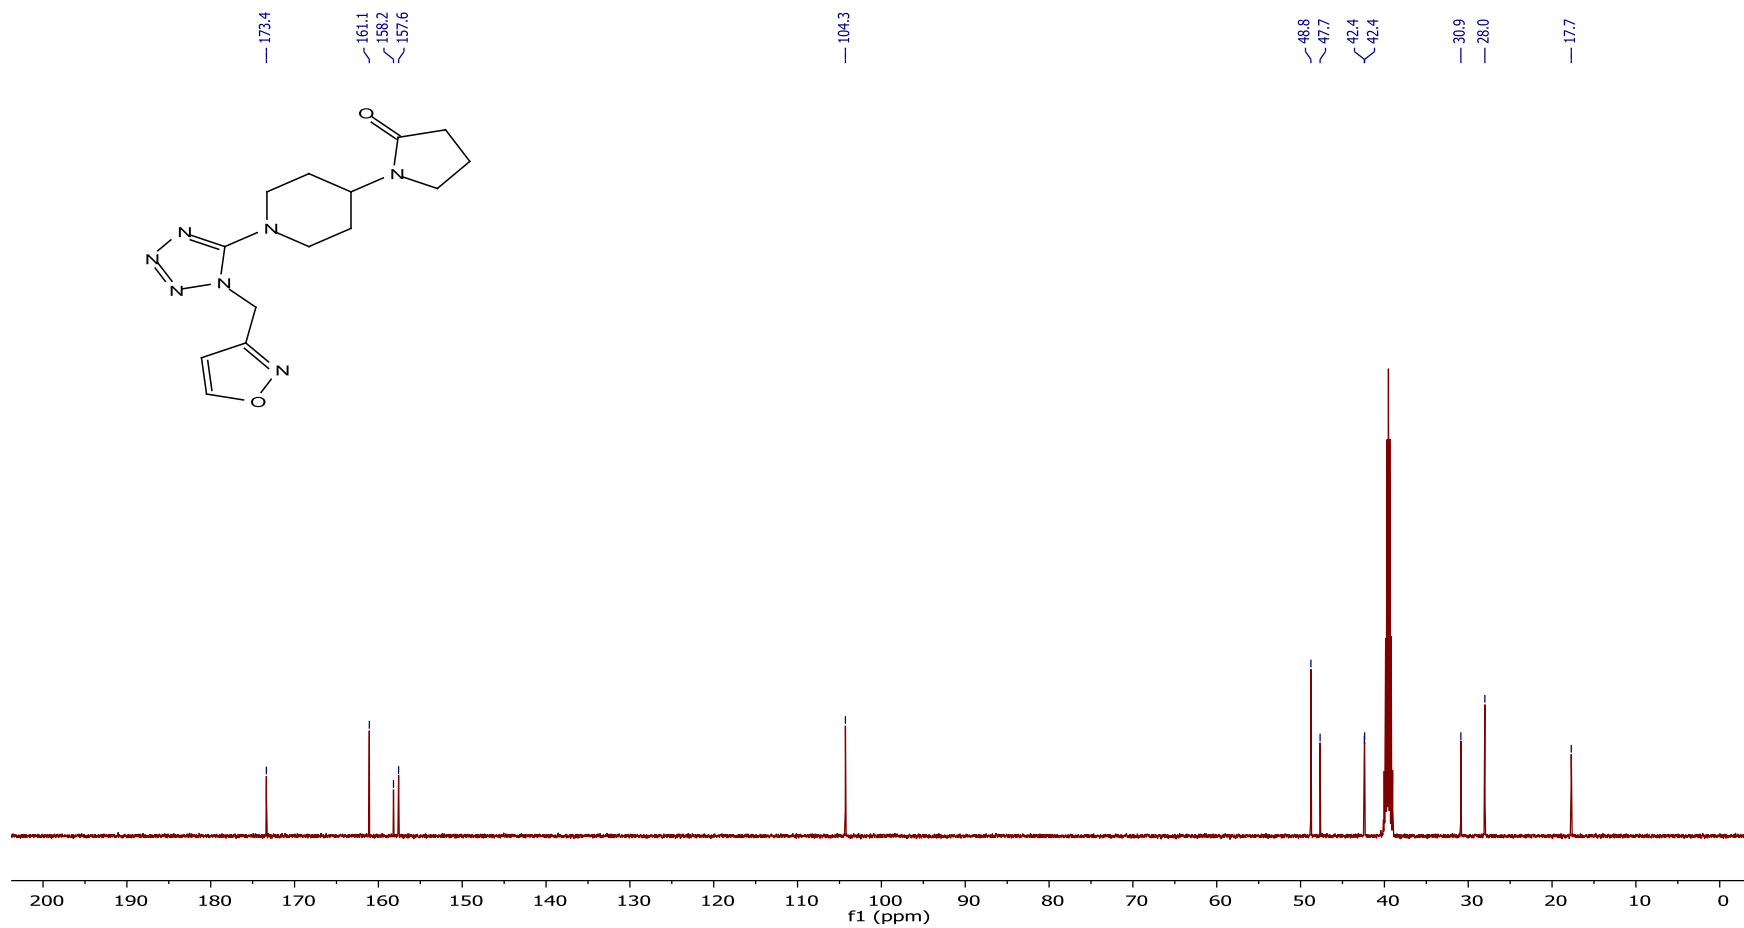

<sup>1</sup>H NMR spectrum of the compound **8**{56,271}.

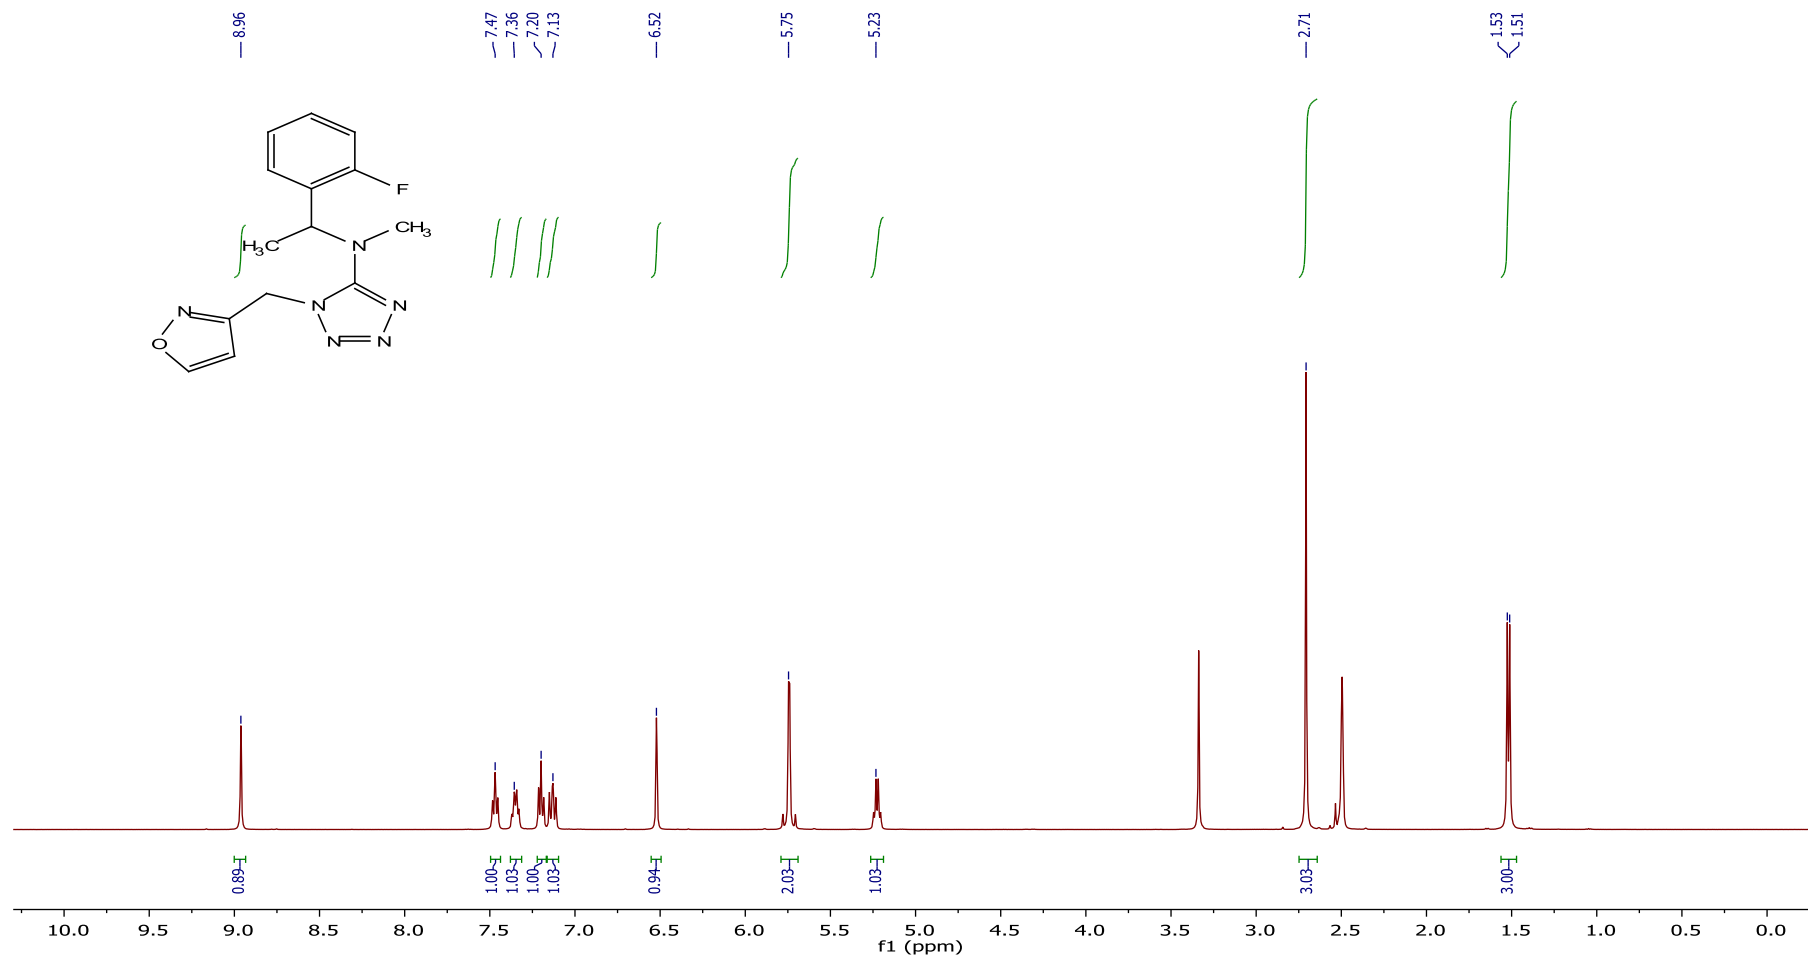

$^{13}\text{C}$  NMR spectrum of the compound **8**{56,271}.

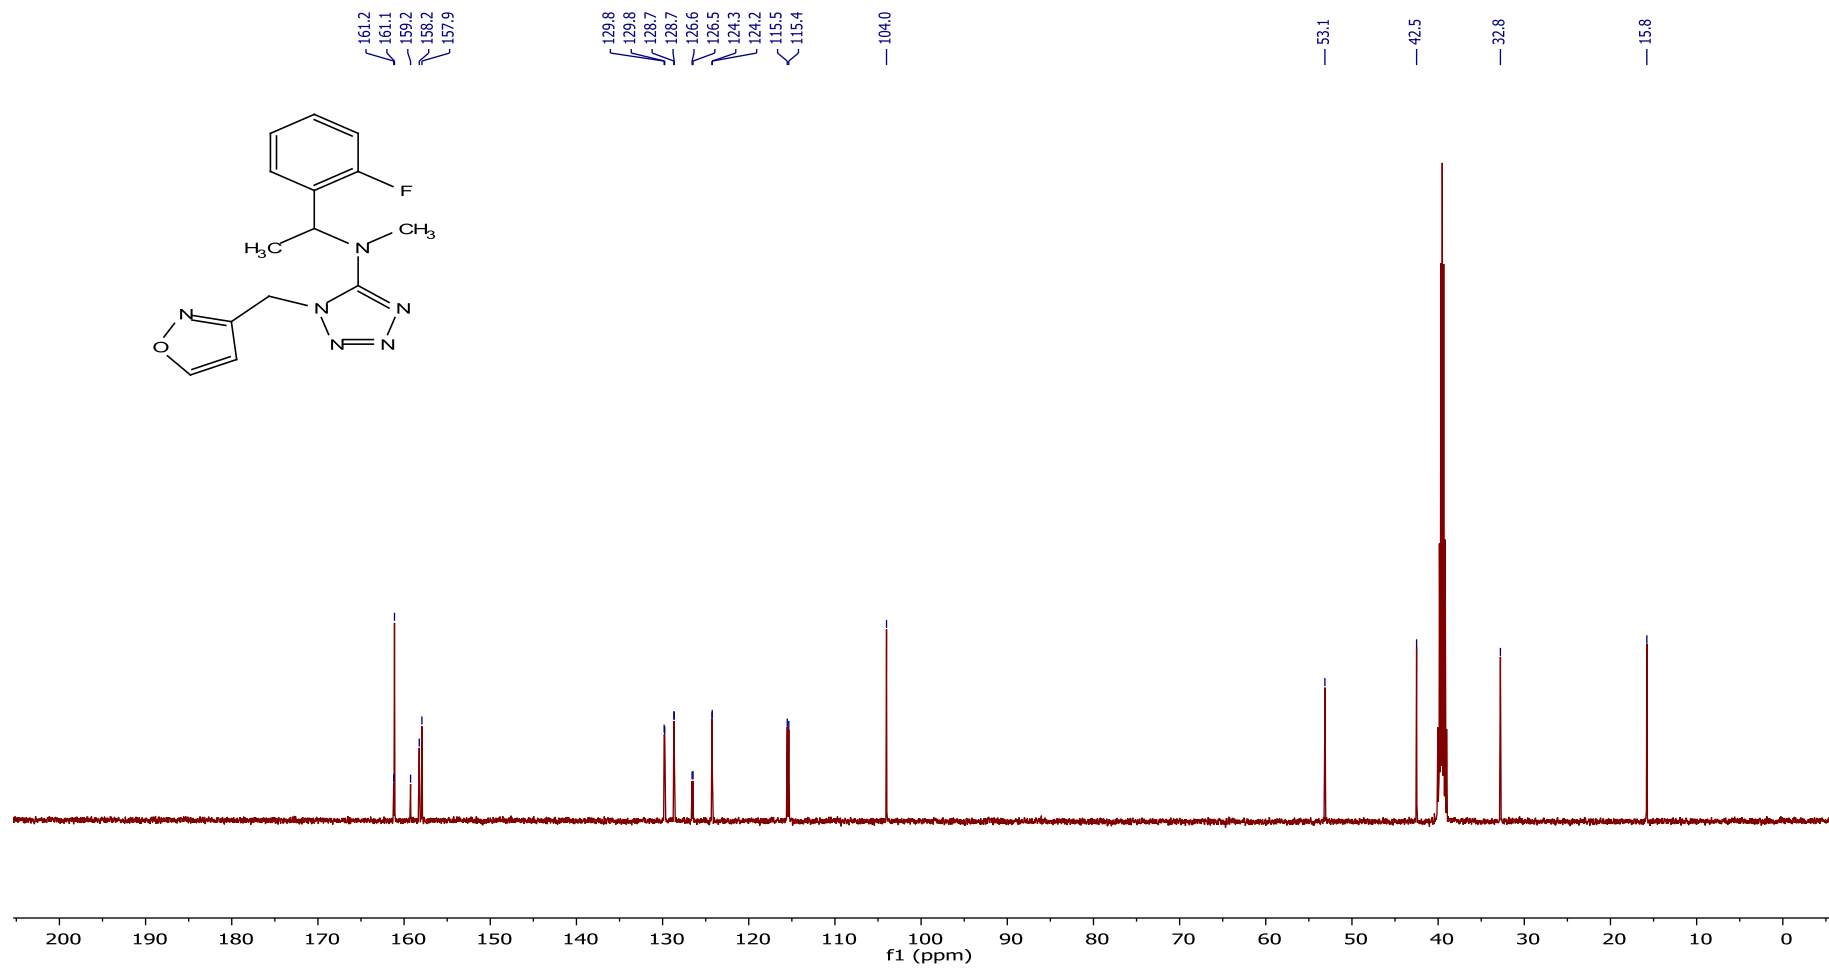



$^{19}\text{F}$  NMR spectrum of the compound **8**{56,271}.

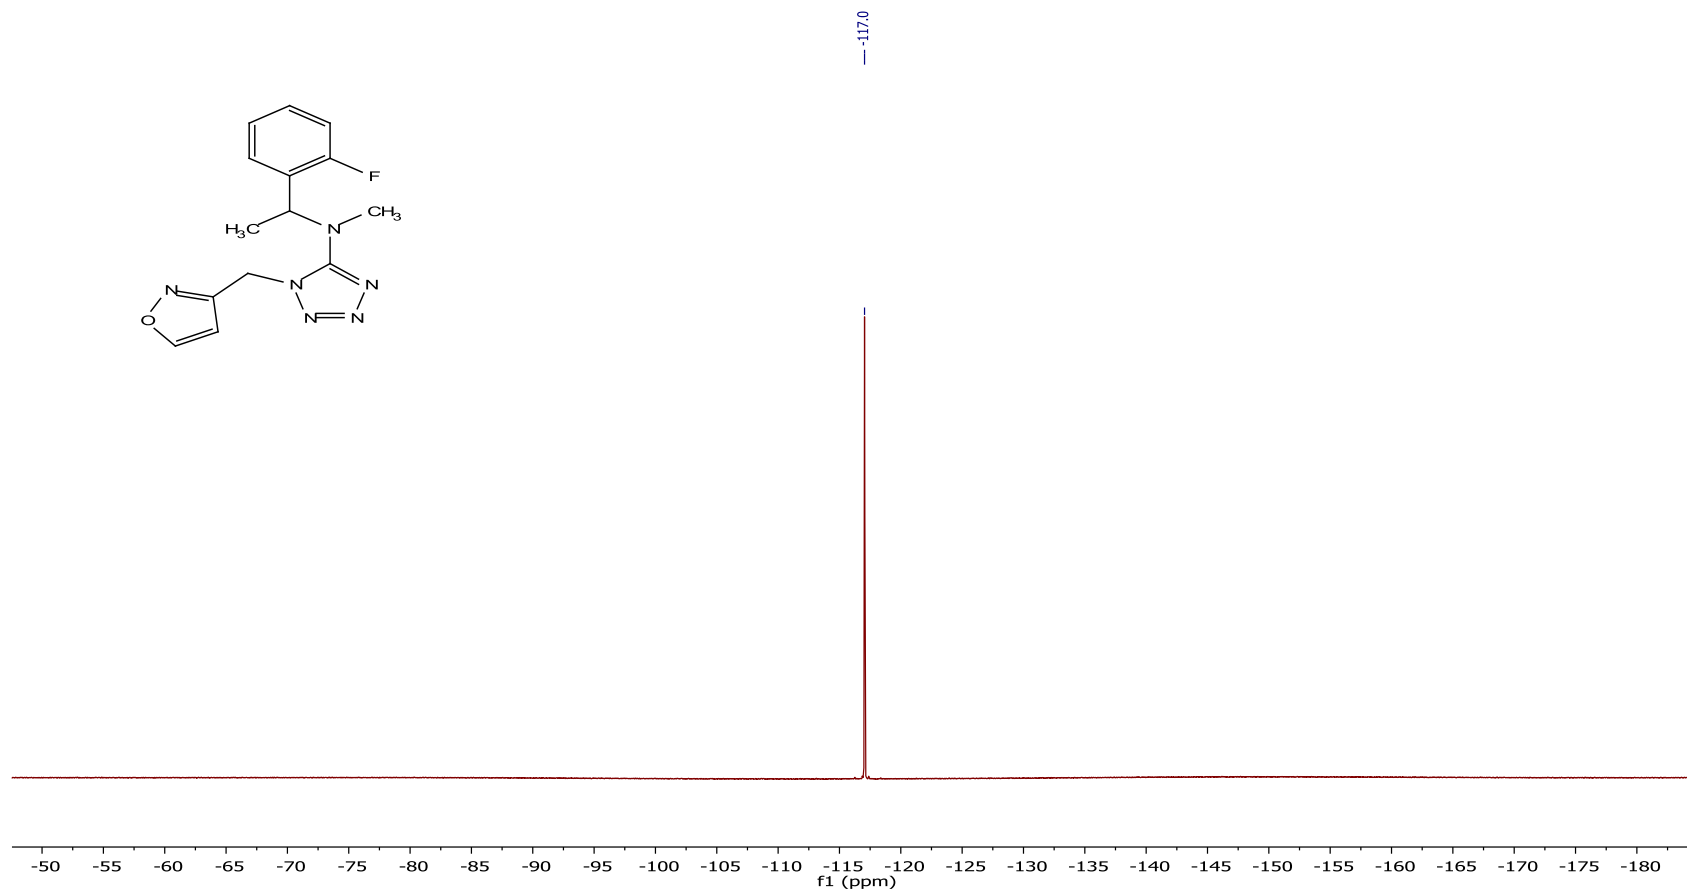

<sup>1</sup>H NMR spectrum of the compound **8**{58,280}.

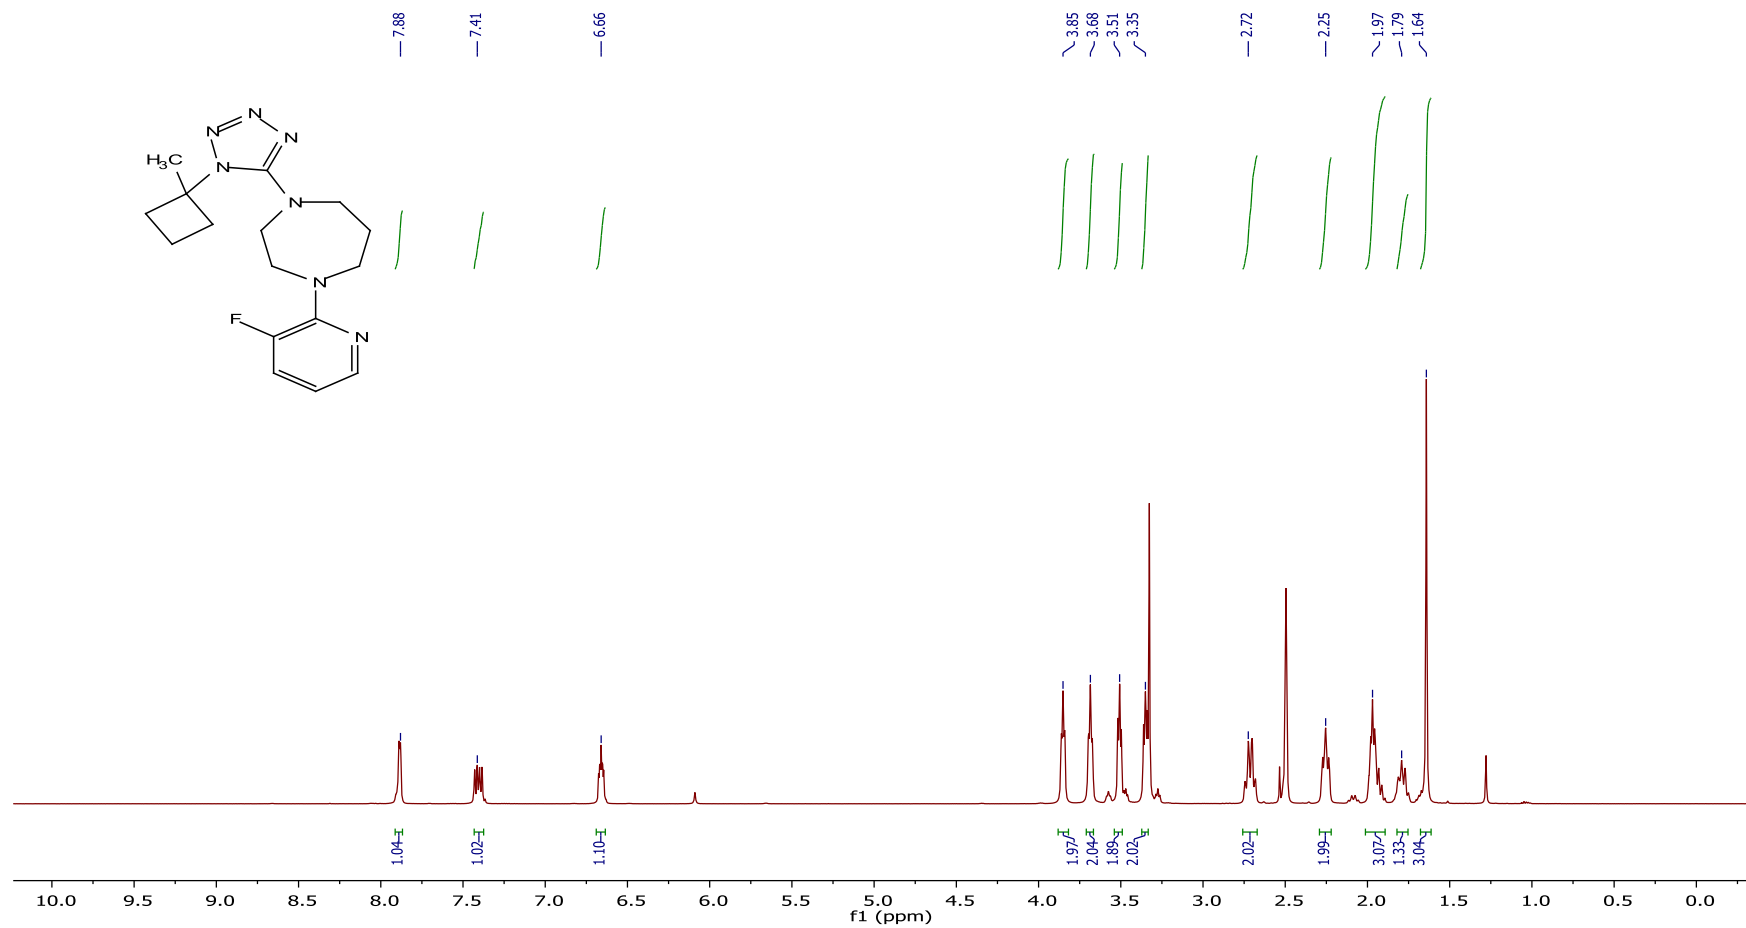

$^{13}\text{C}$  NMR spectrum of the compound **8**{58,280}.

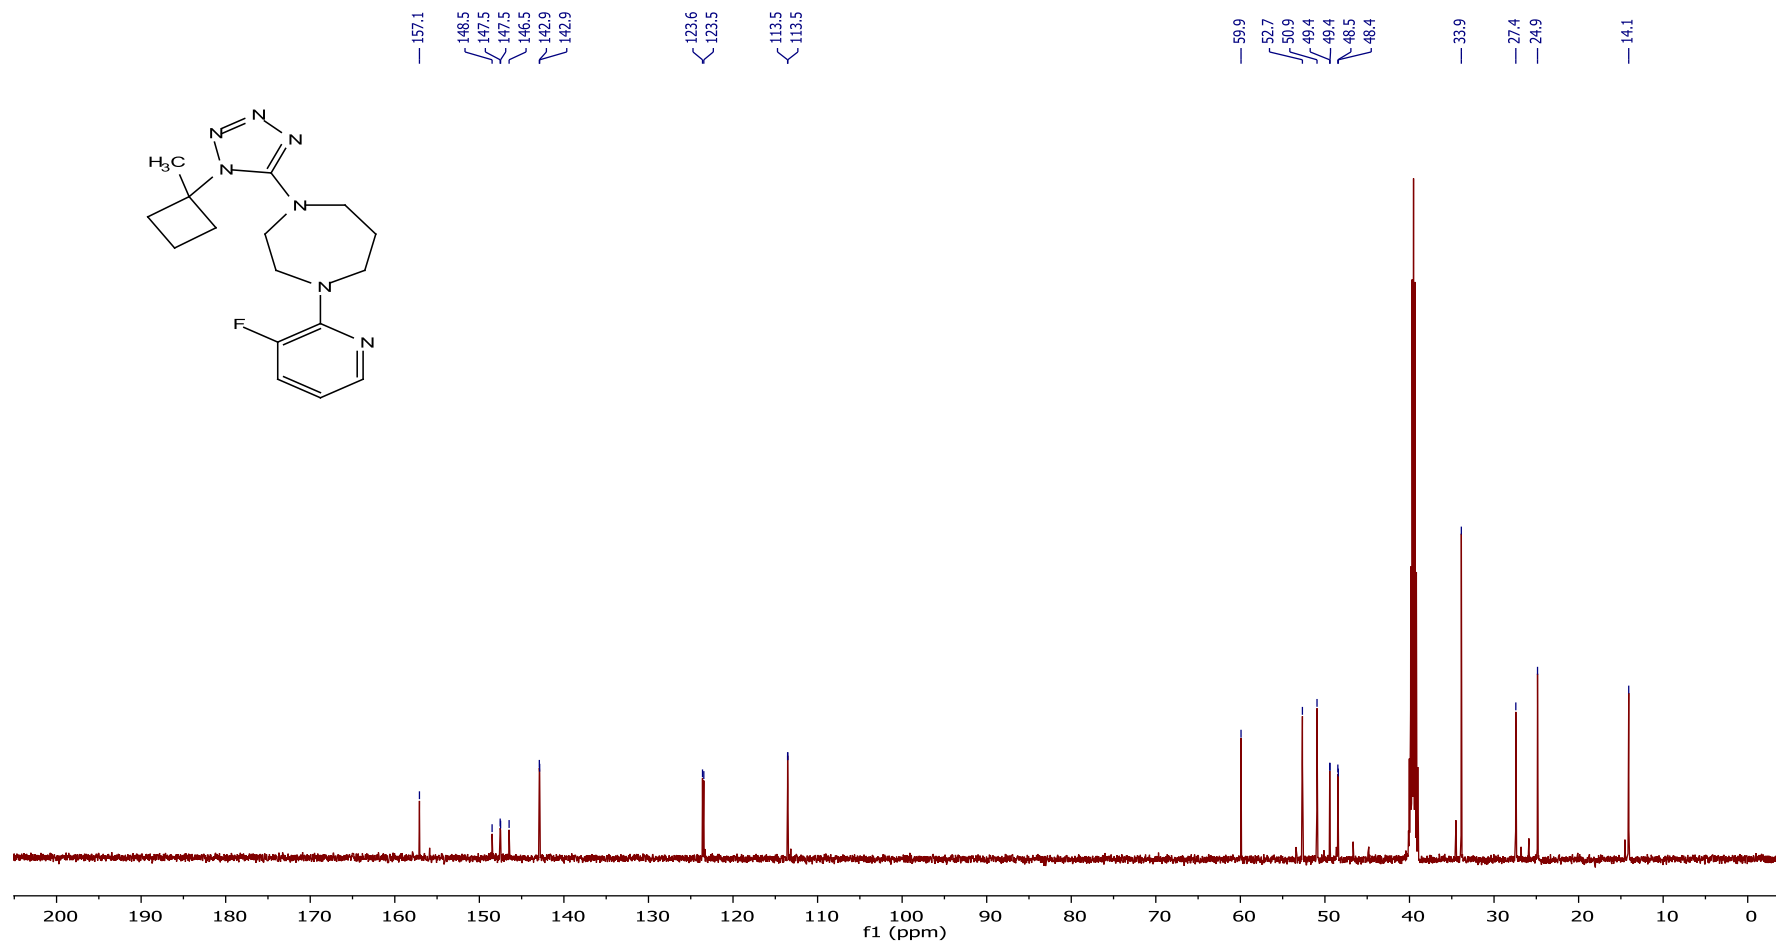

$^{19}\text{F}$  NMR spectrum of the compound **8**{58,280}.

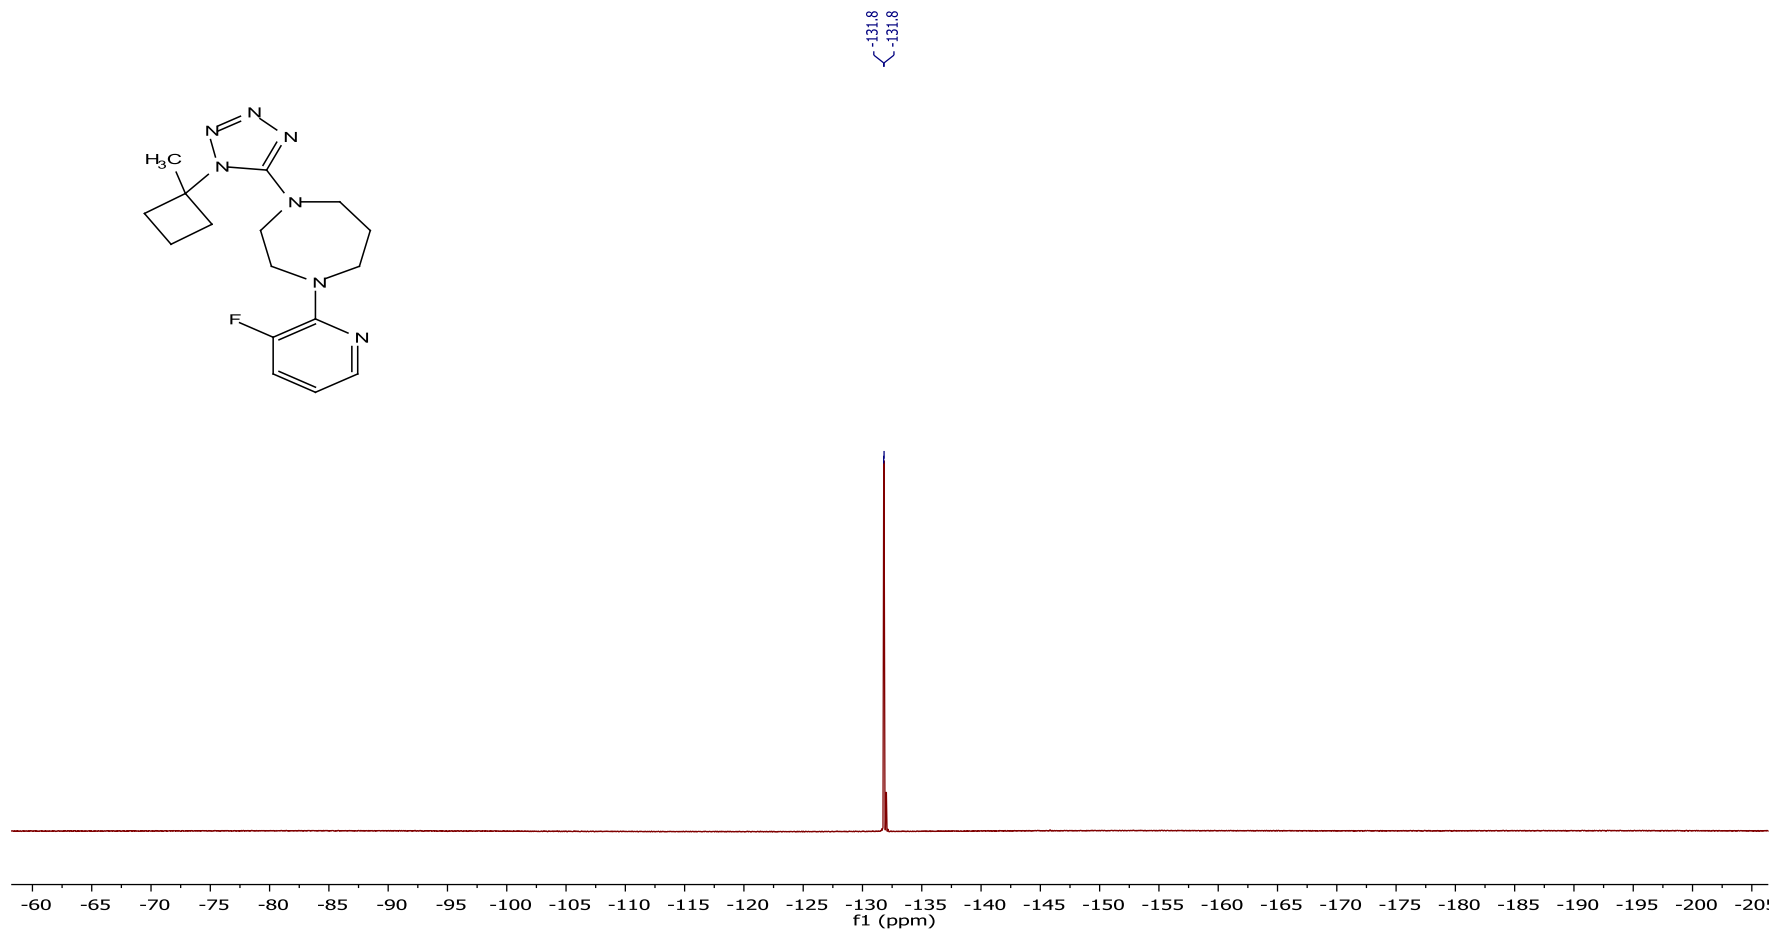

<sup>1</sup>H NMR spectrum of the compound **9**{4,289}.

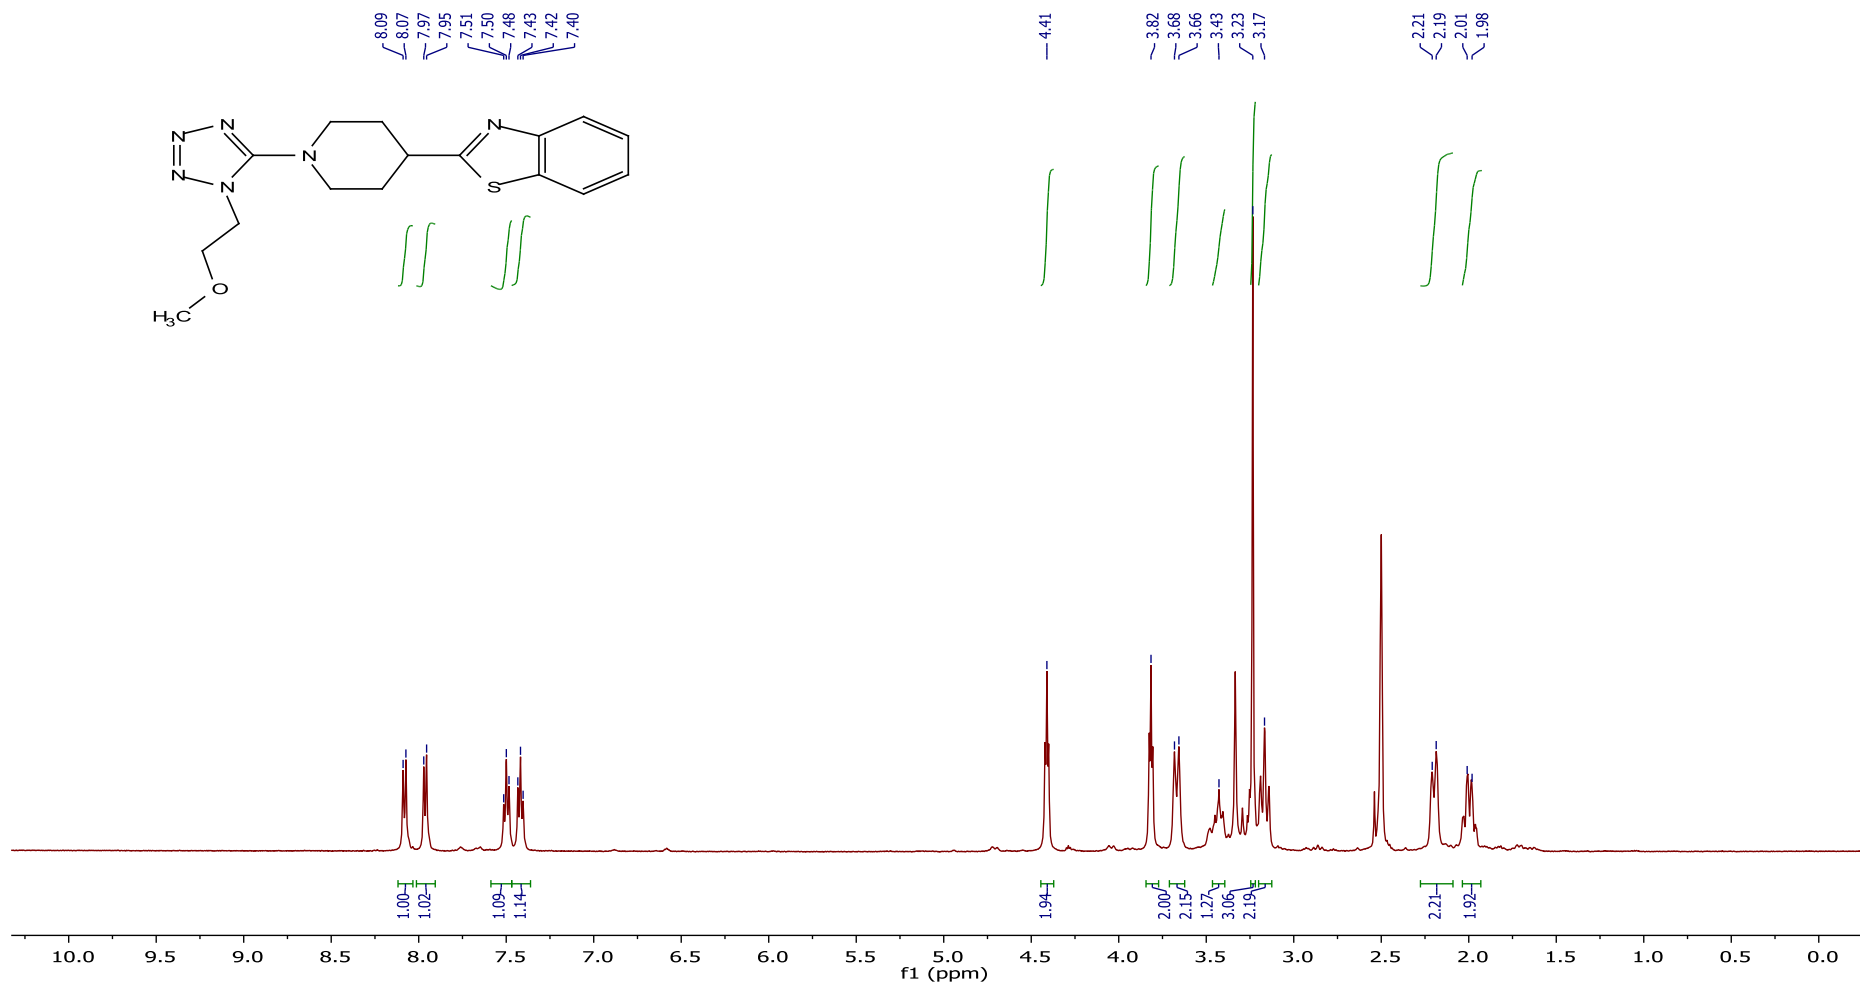

<sup>13</sup>C NMR spectrum of the compound **9**{4,289}.

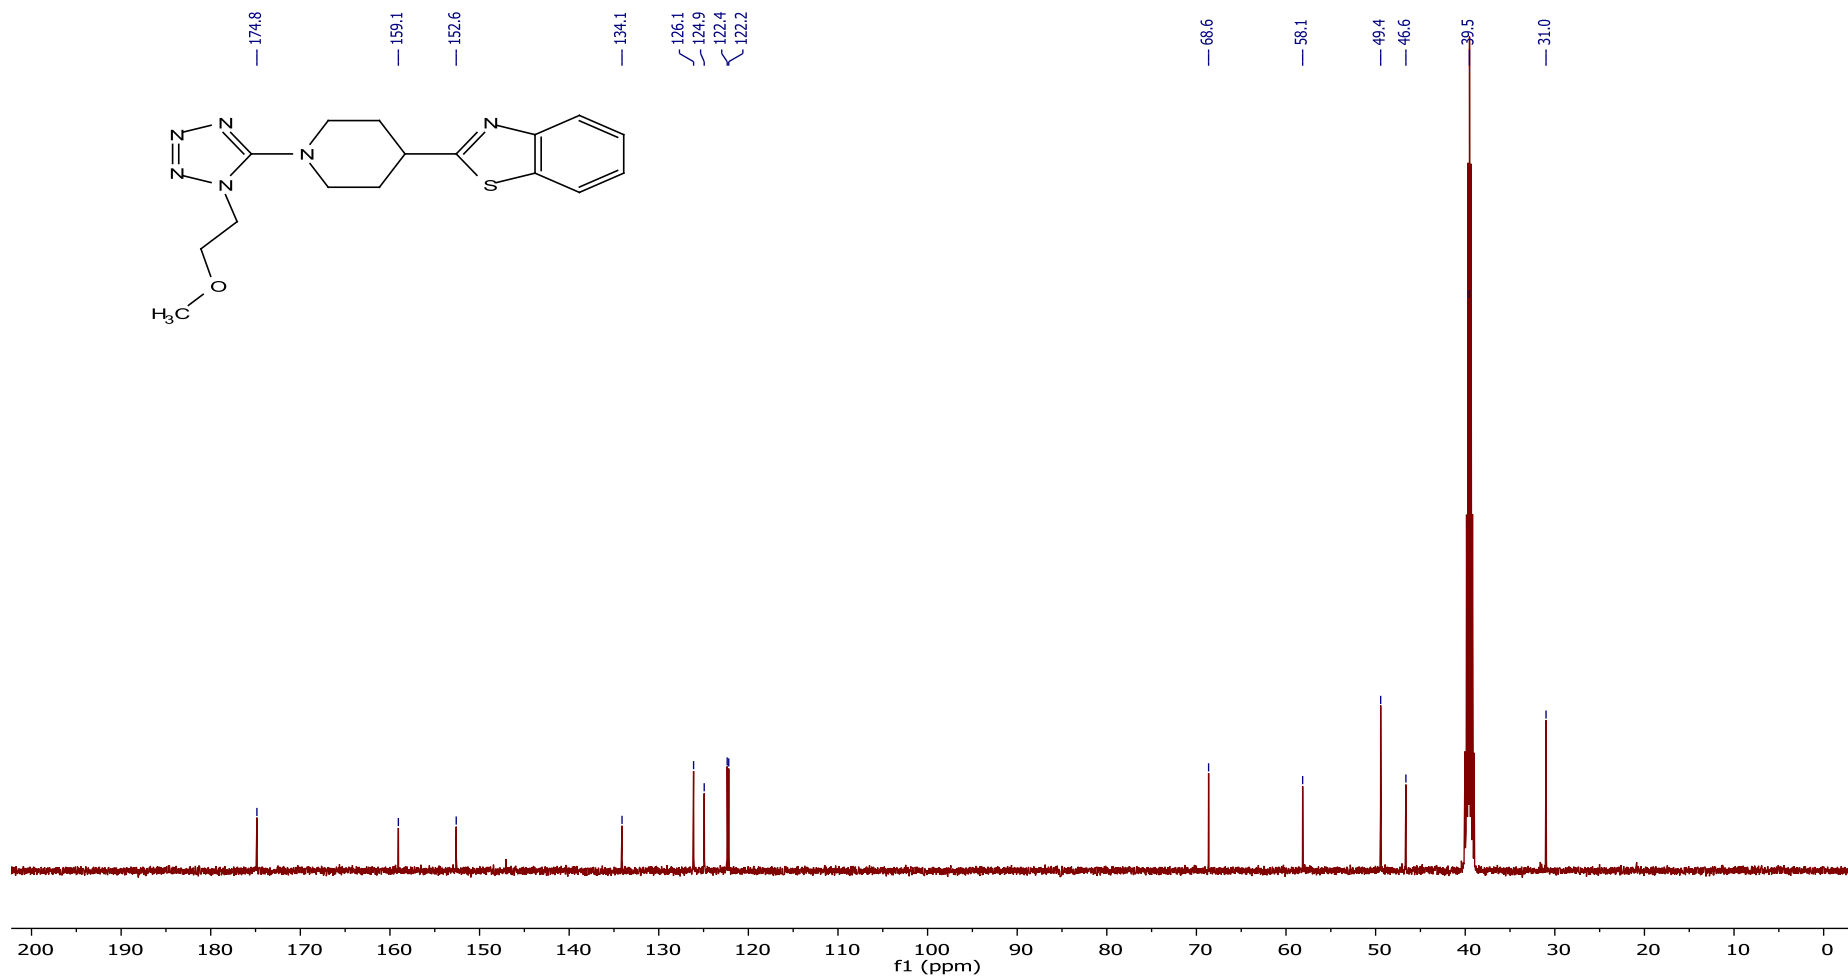

$^1\text{H}$  NMR spectrum of the compound **9**{4,291}.

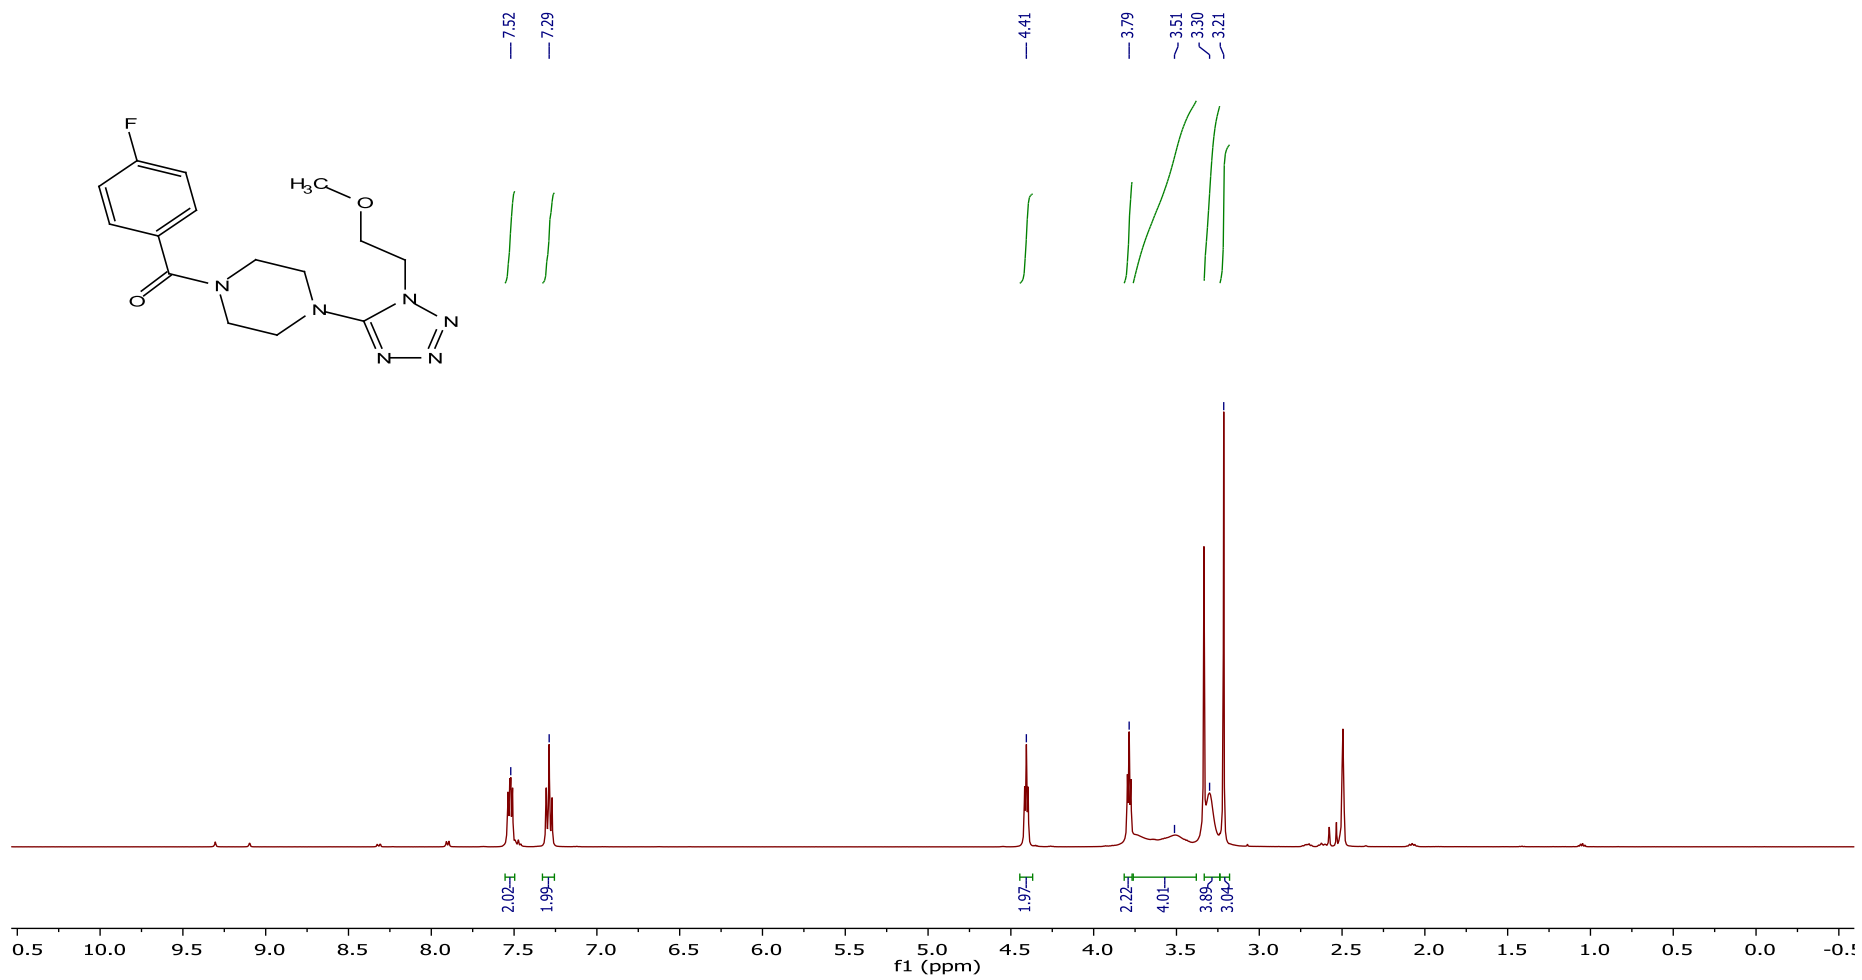

$^{13}\text{C}$  NMR spectrum of the compound **9**{4,291}.

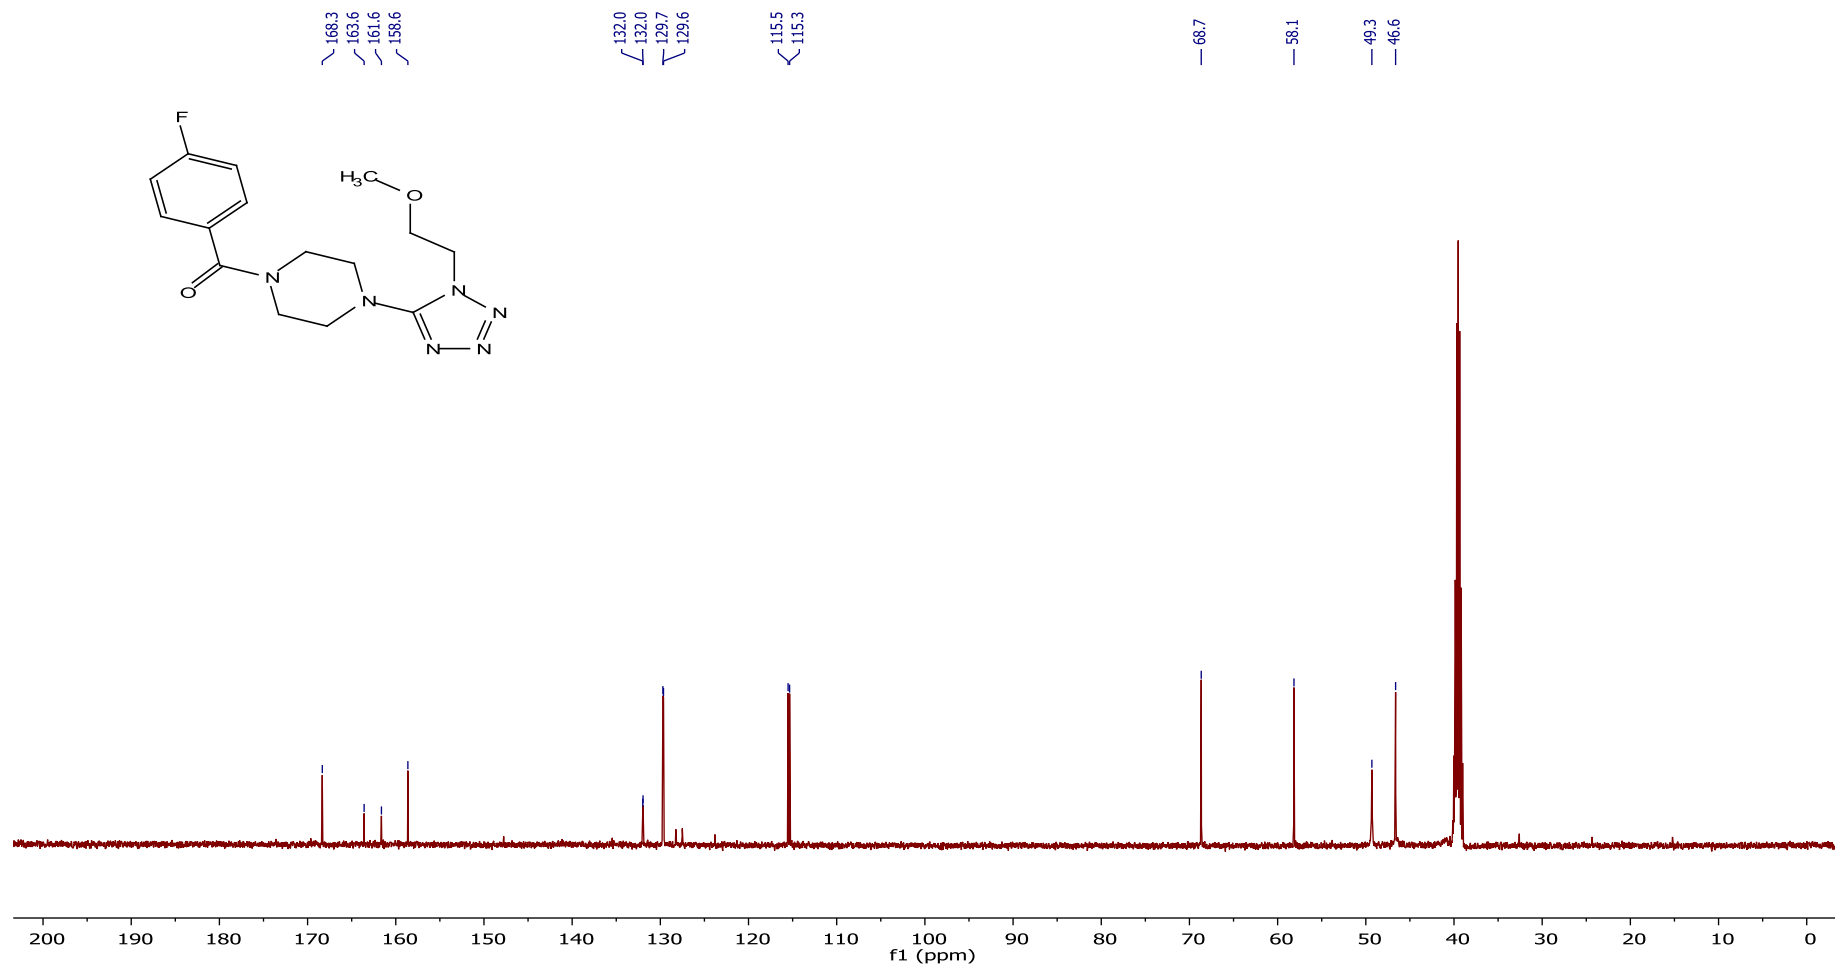



$^{19}\text{F}$  NMR spectrum of the compound **9**{4,291}.

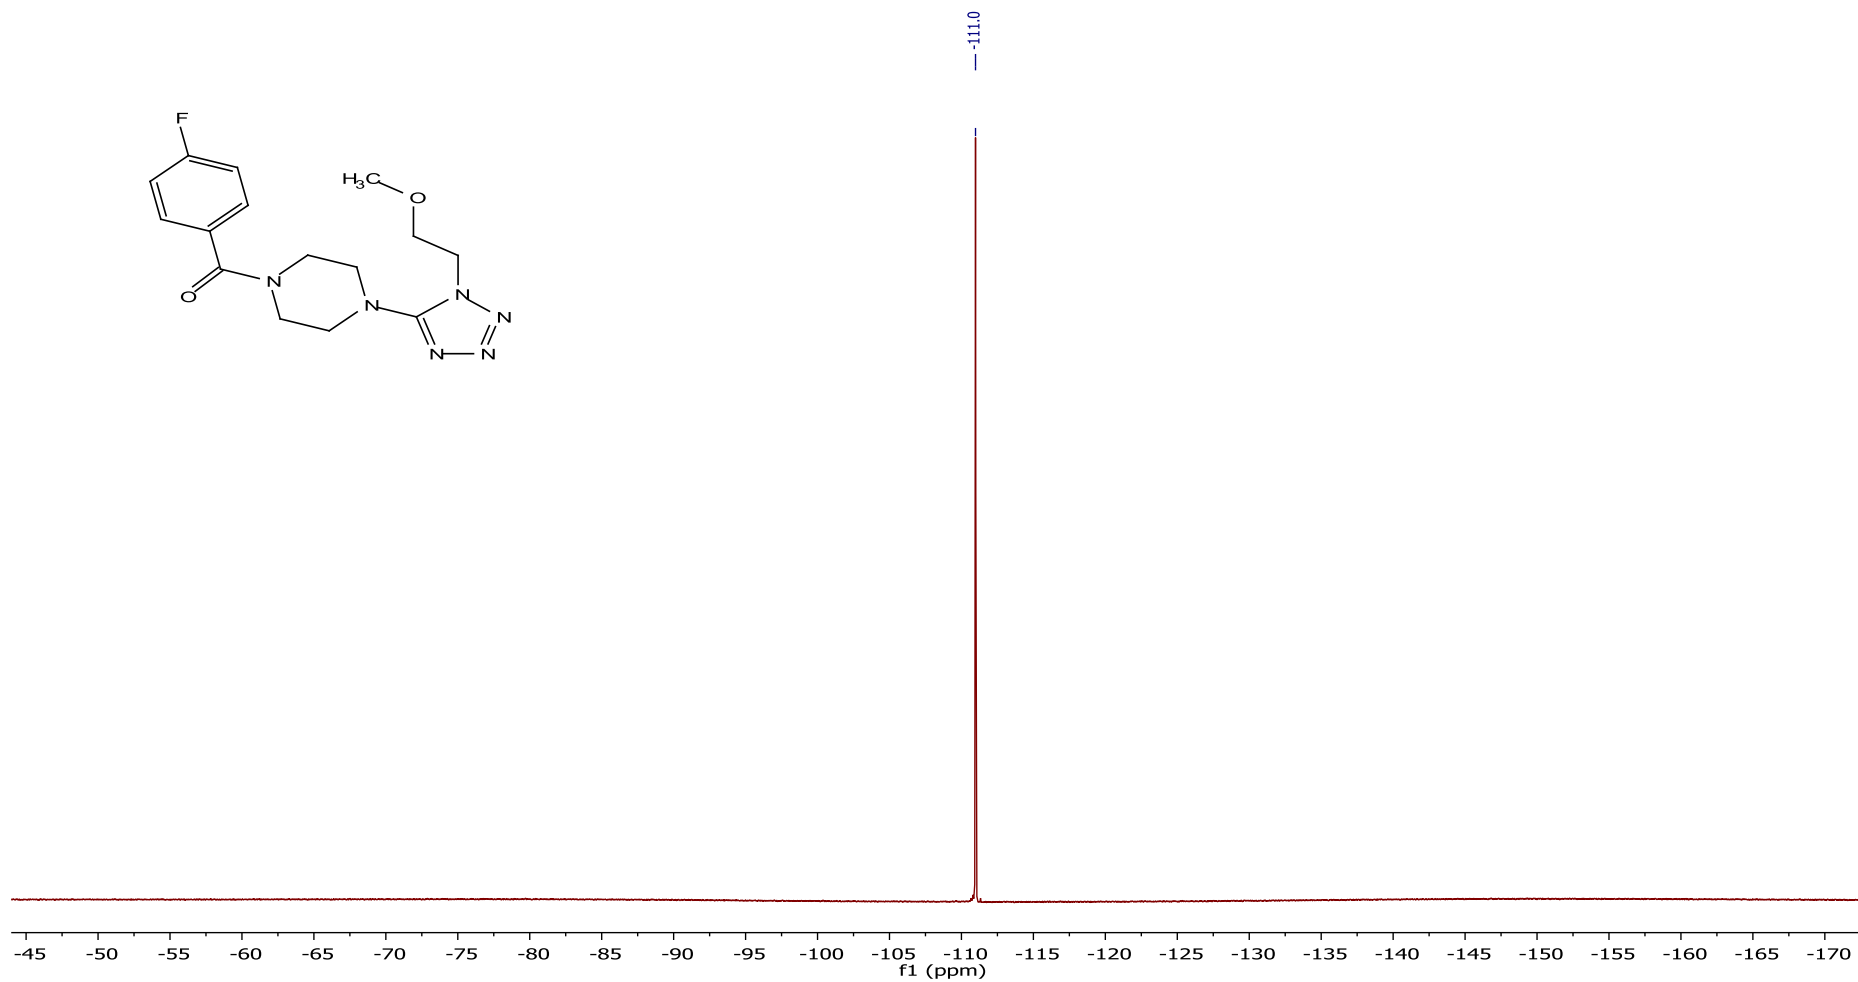

<sup>1</sup>H NMR spectrum of the compound **9**{18,300}.

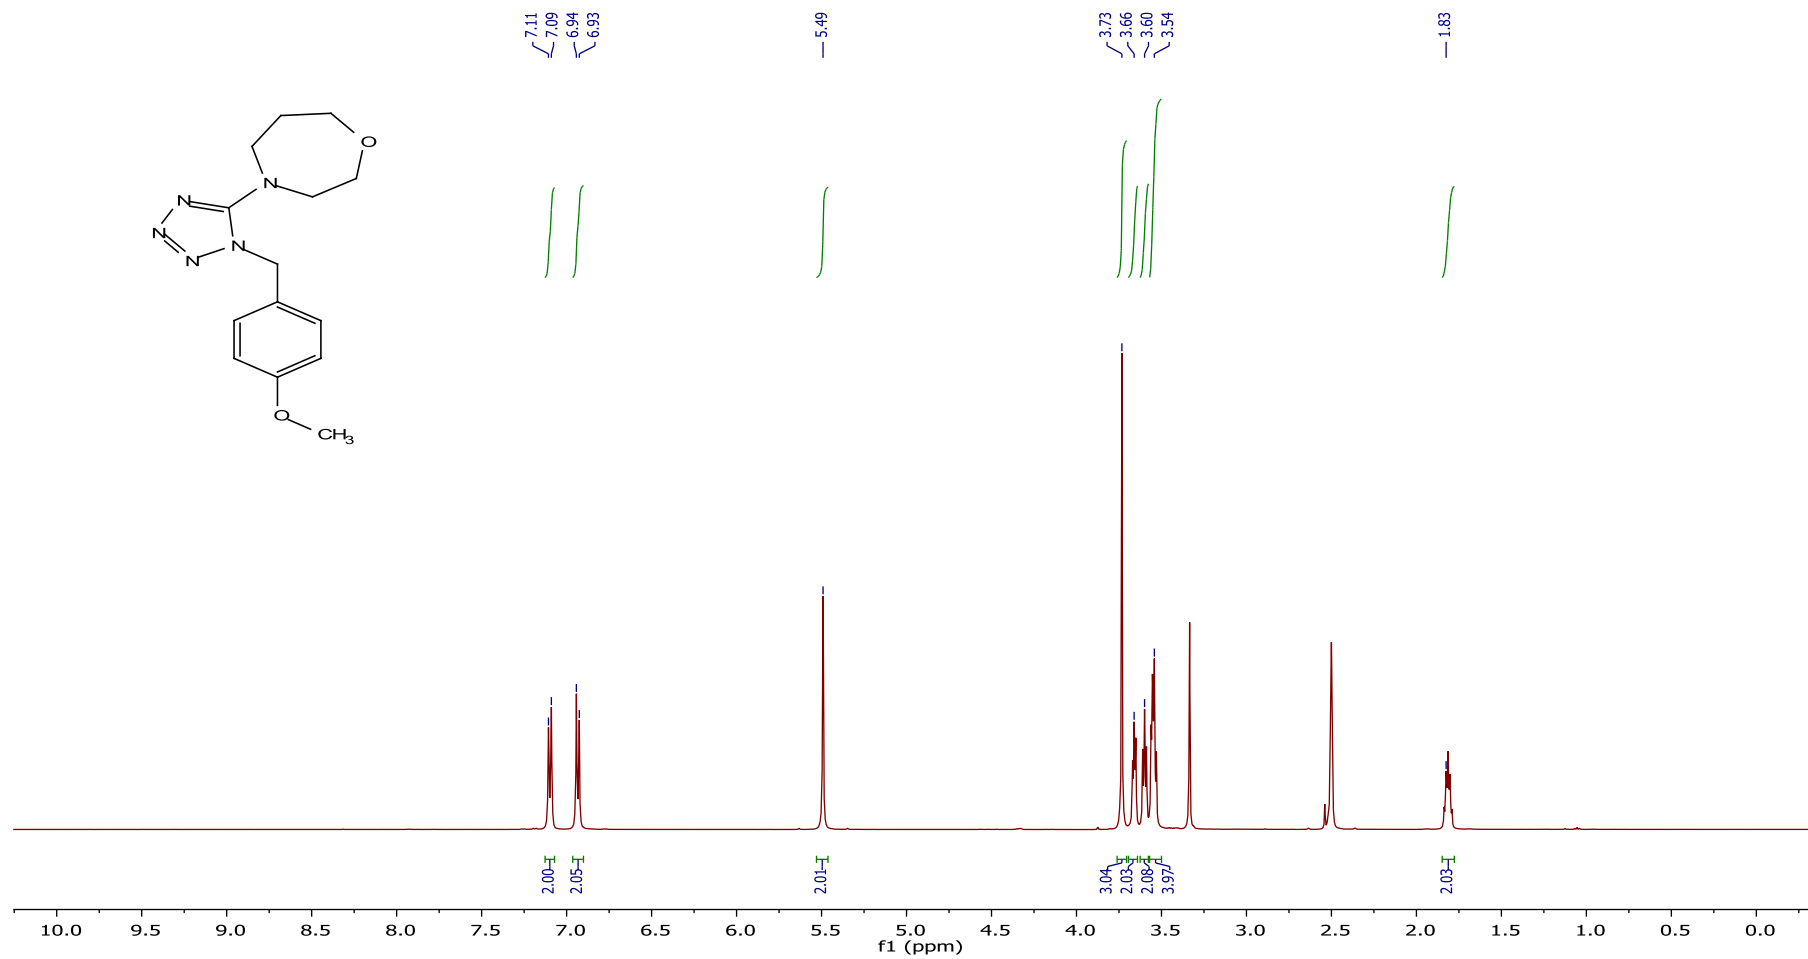

$^{13}\text{C}$  NMR spectrum of the compound **9**{18,300}.

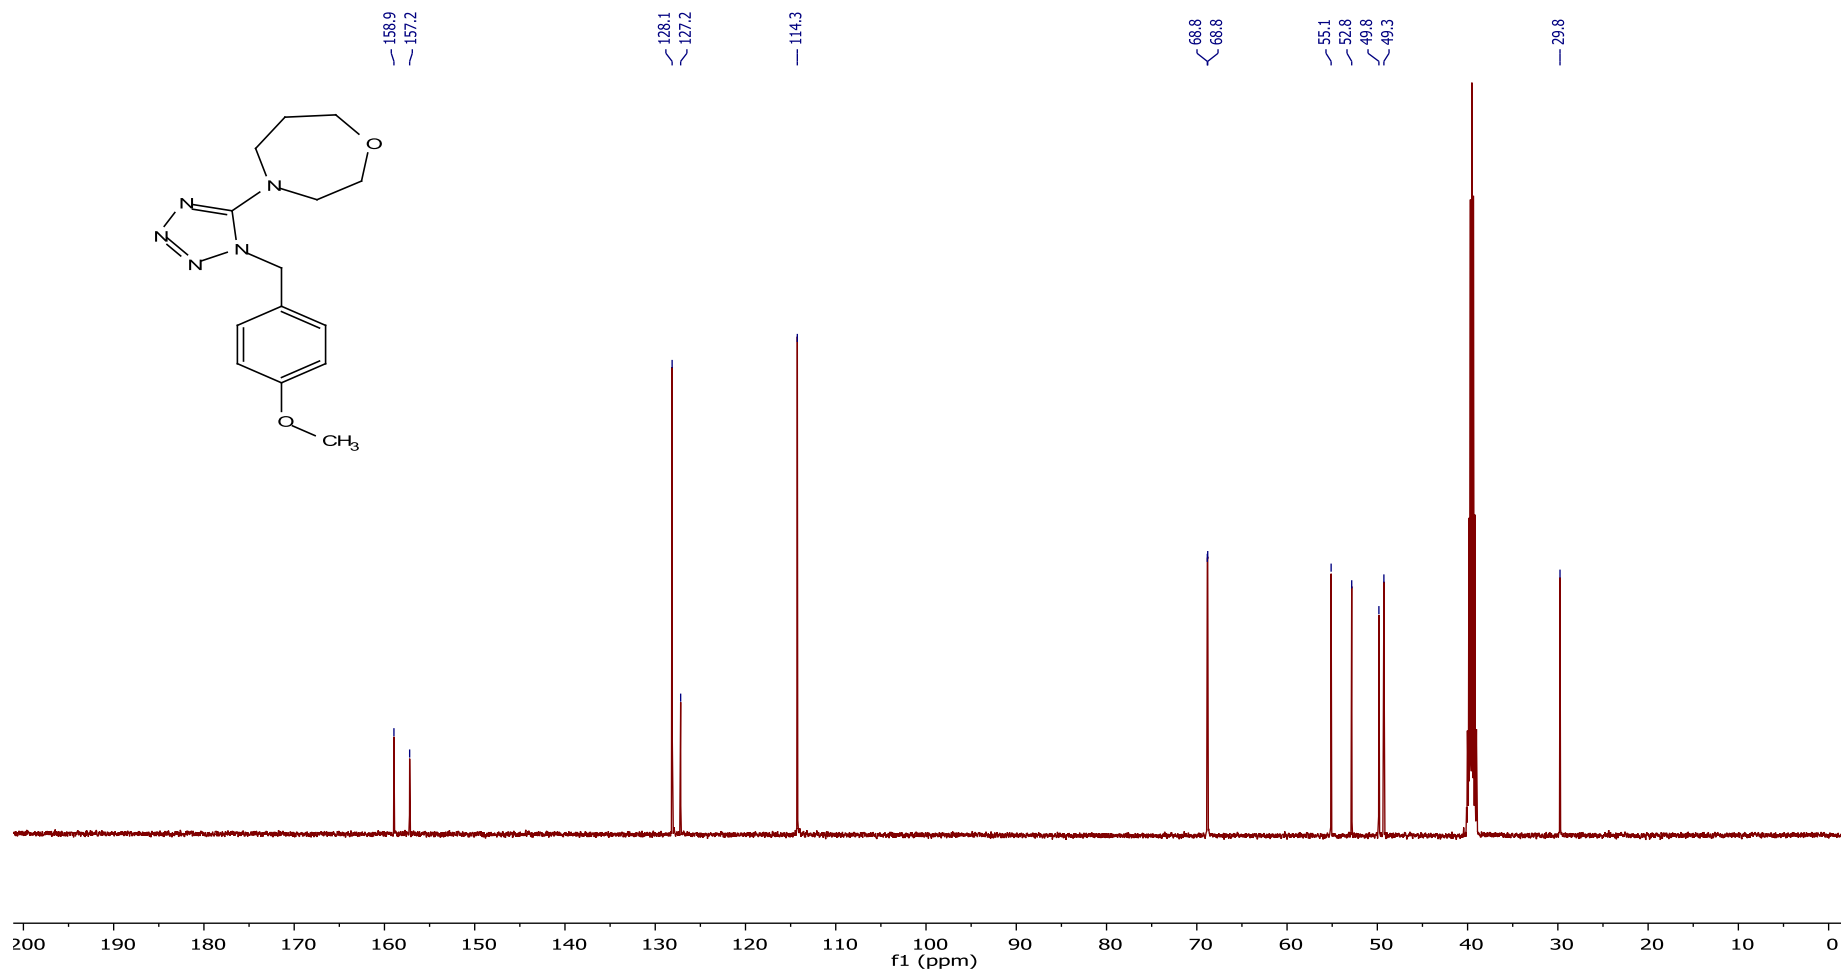

<sup>1</sup>H NMR spectrum of the compound **9**{25,147}.

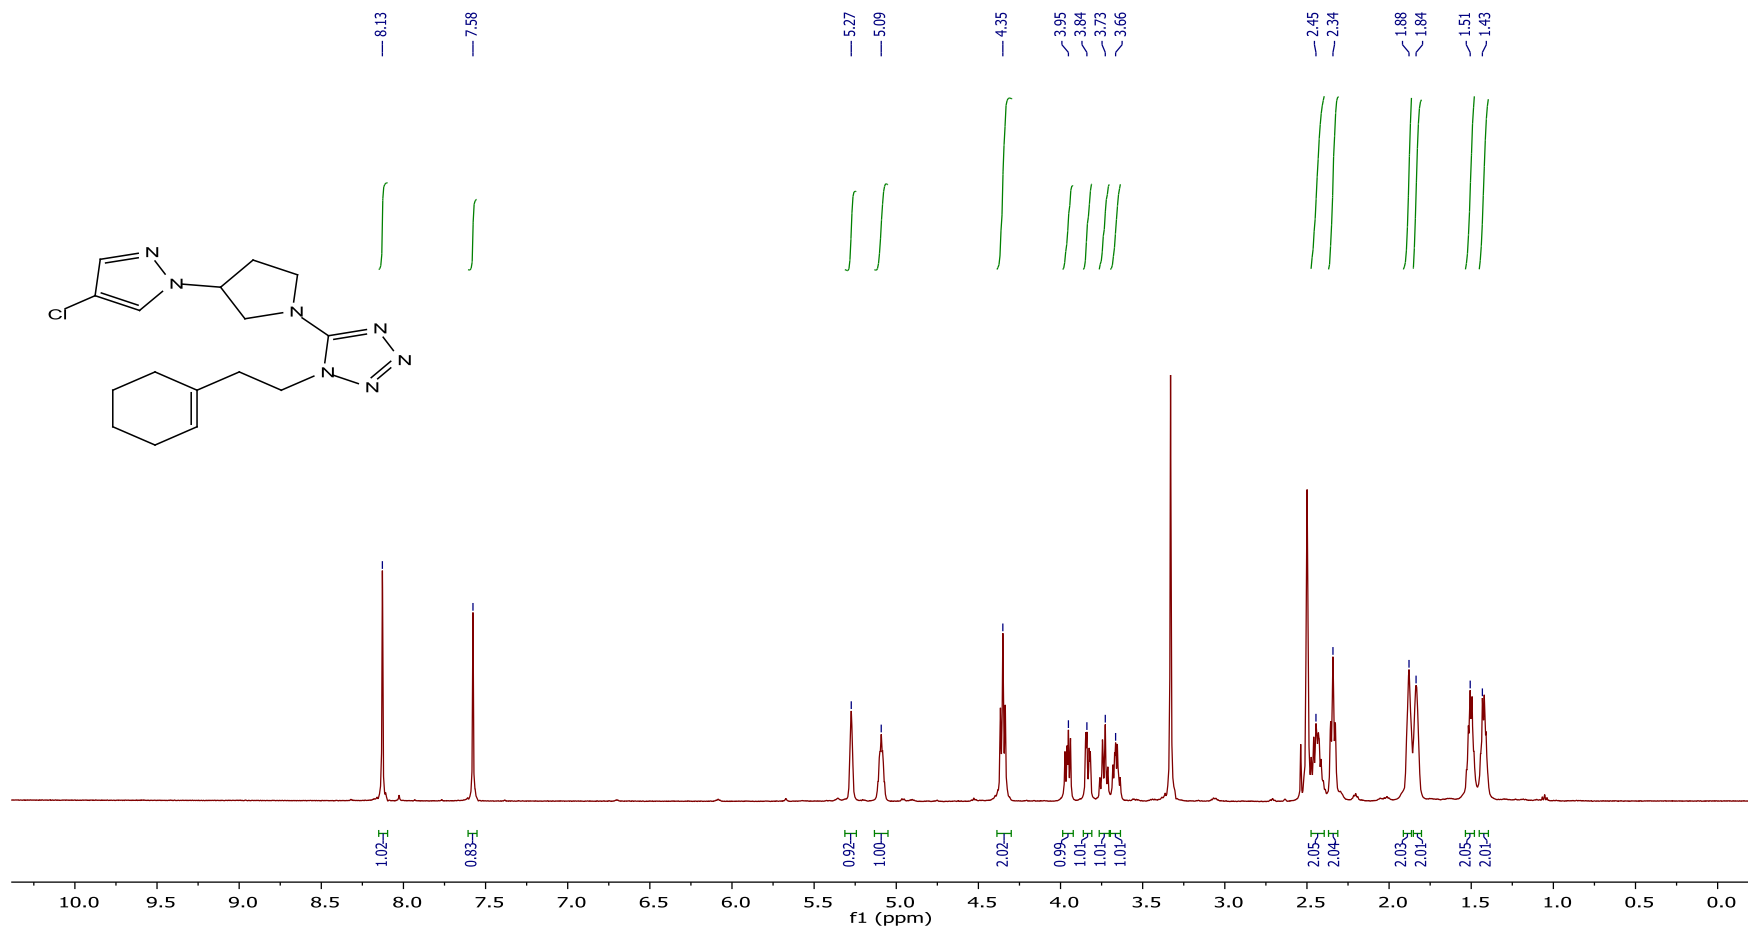

$^{13}\text{C}$  NMR spectrum of the compound **9**{25,147}.

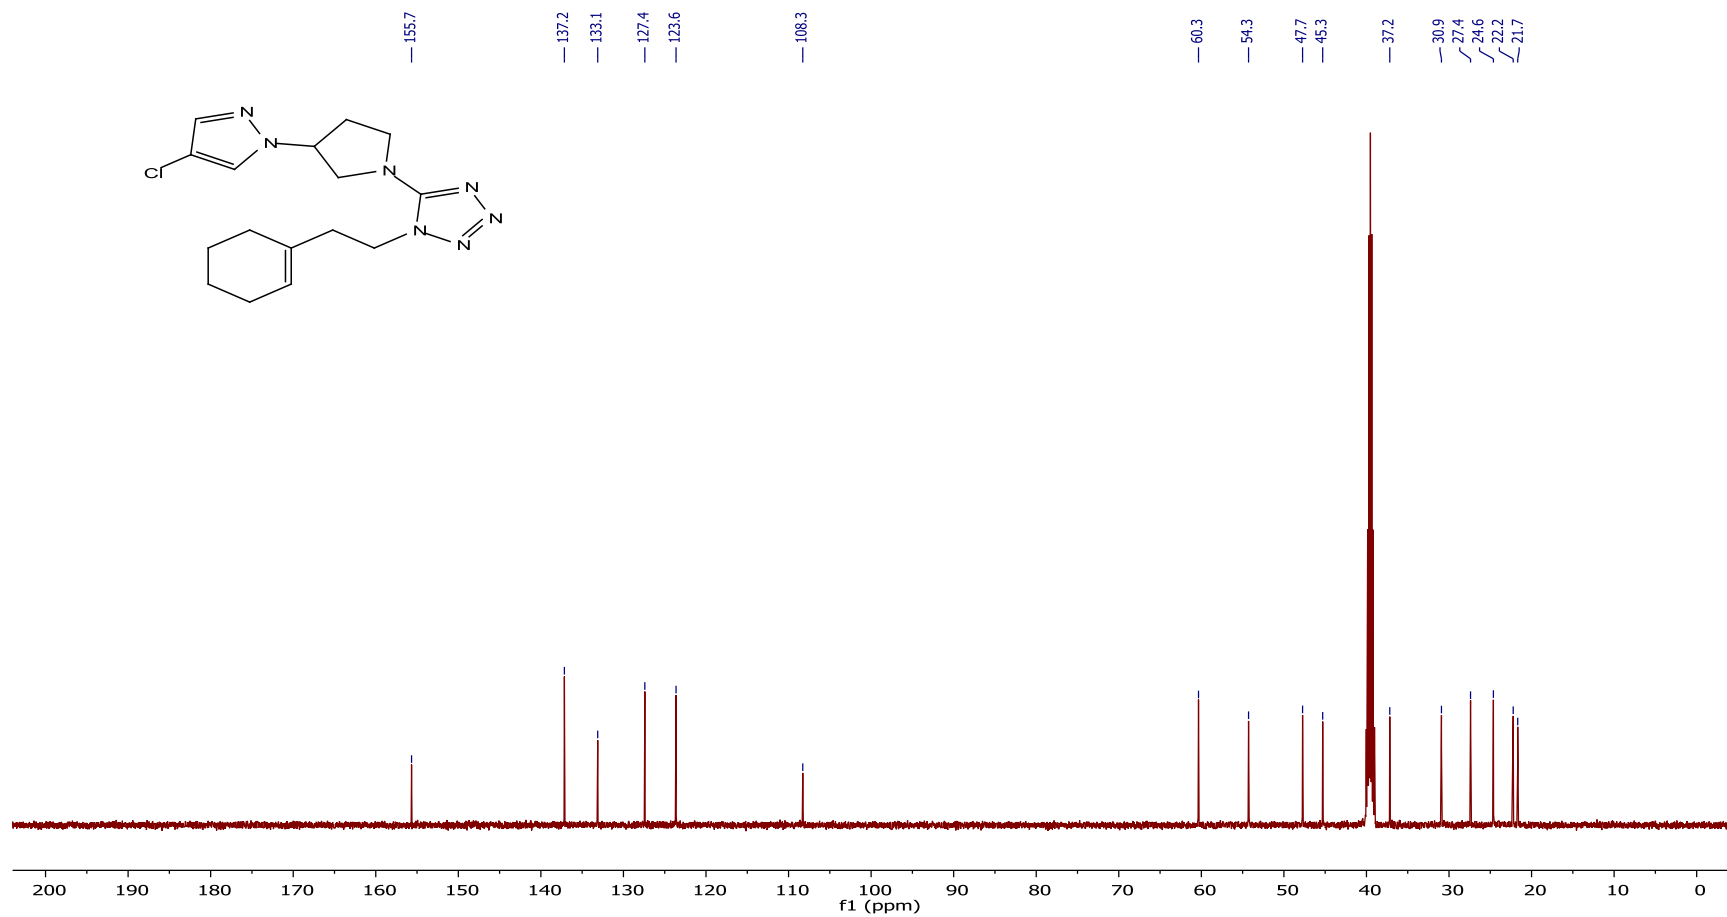

<sup>1</sup>H NMR spectrum of the compound **9**{52,319}.

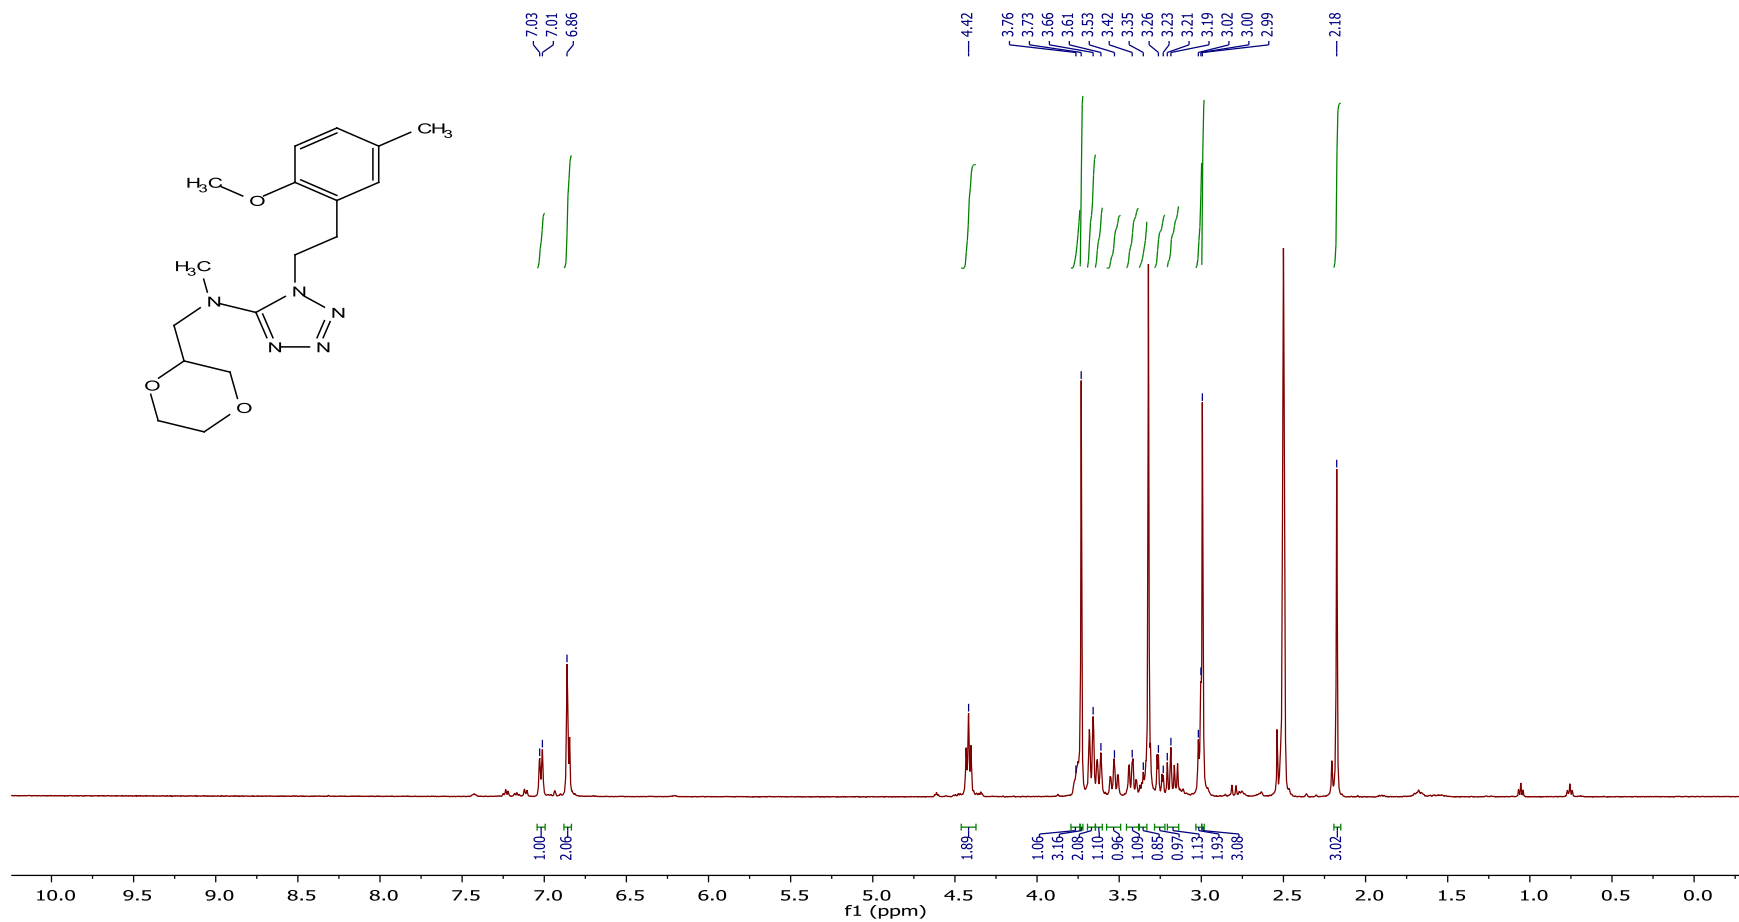

$^{13}\text{C}$  NMR spectrum of the compound **9**{52,319}.

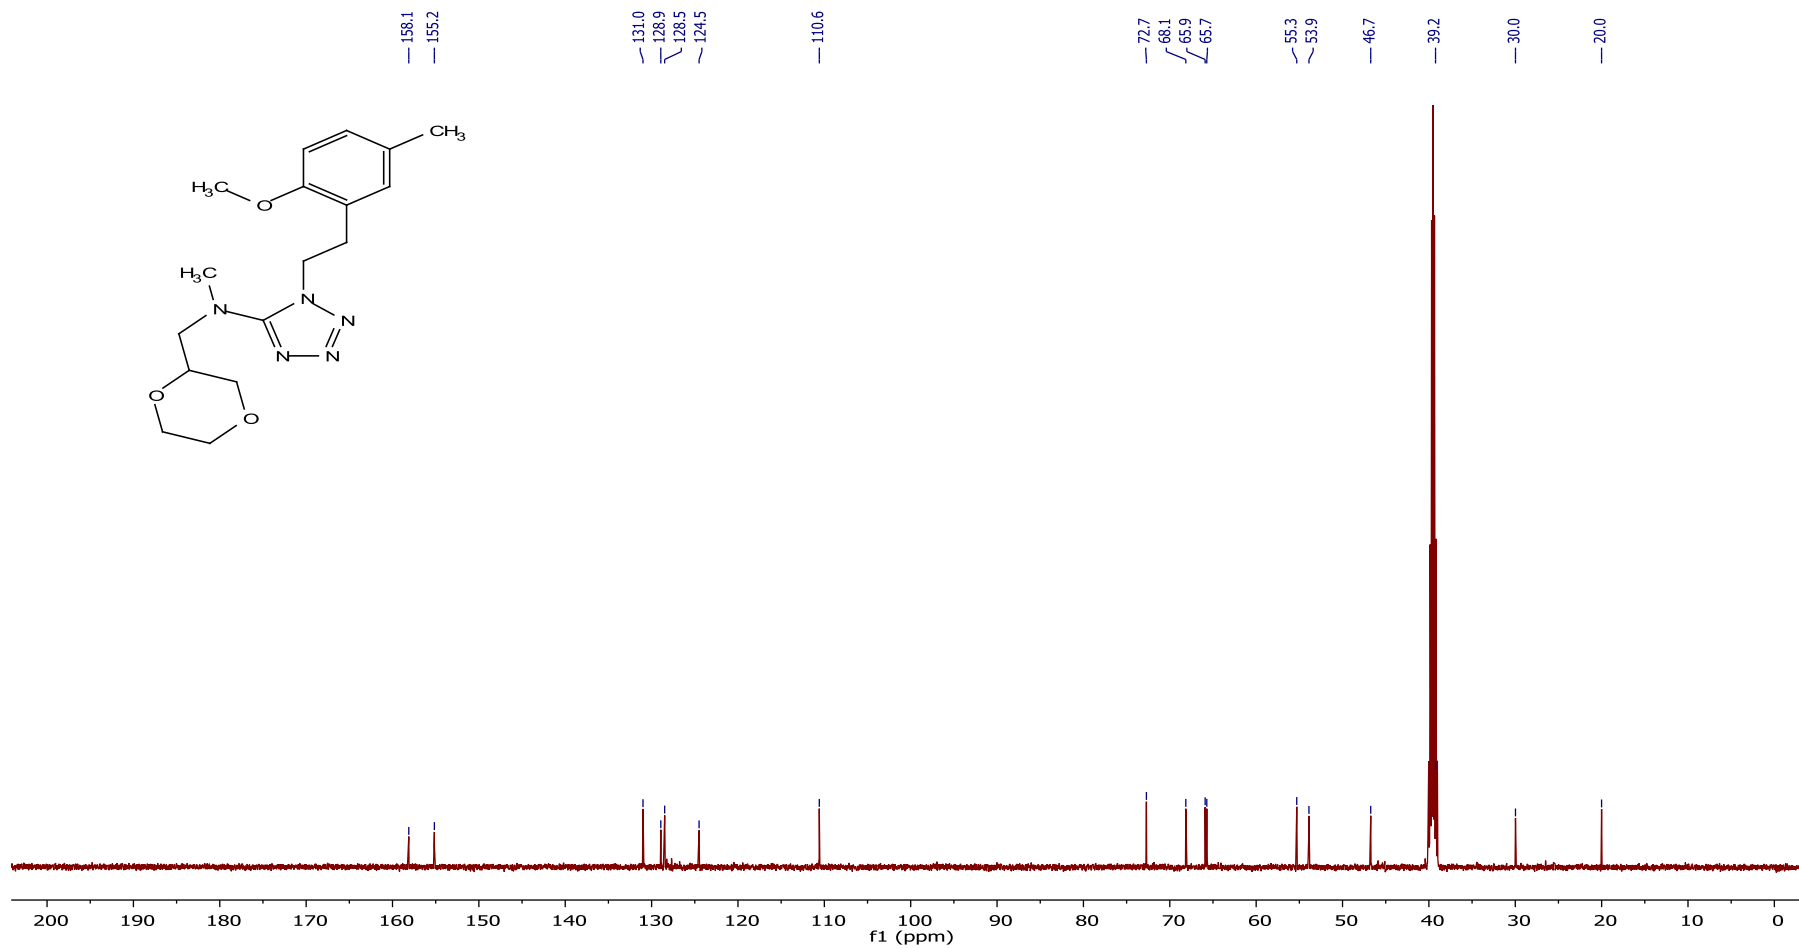

<sup>1</sup>H NMR spectrum of the compound **9**{55,337}.

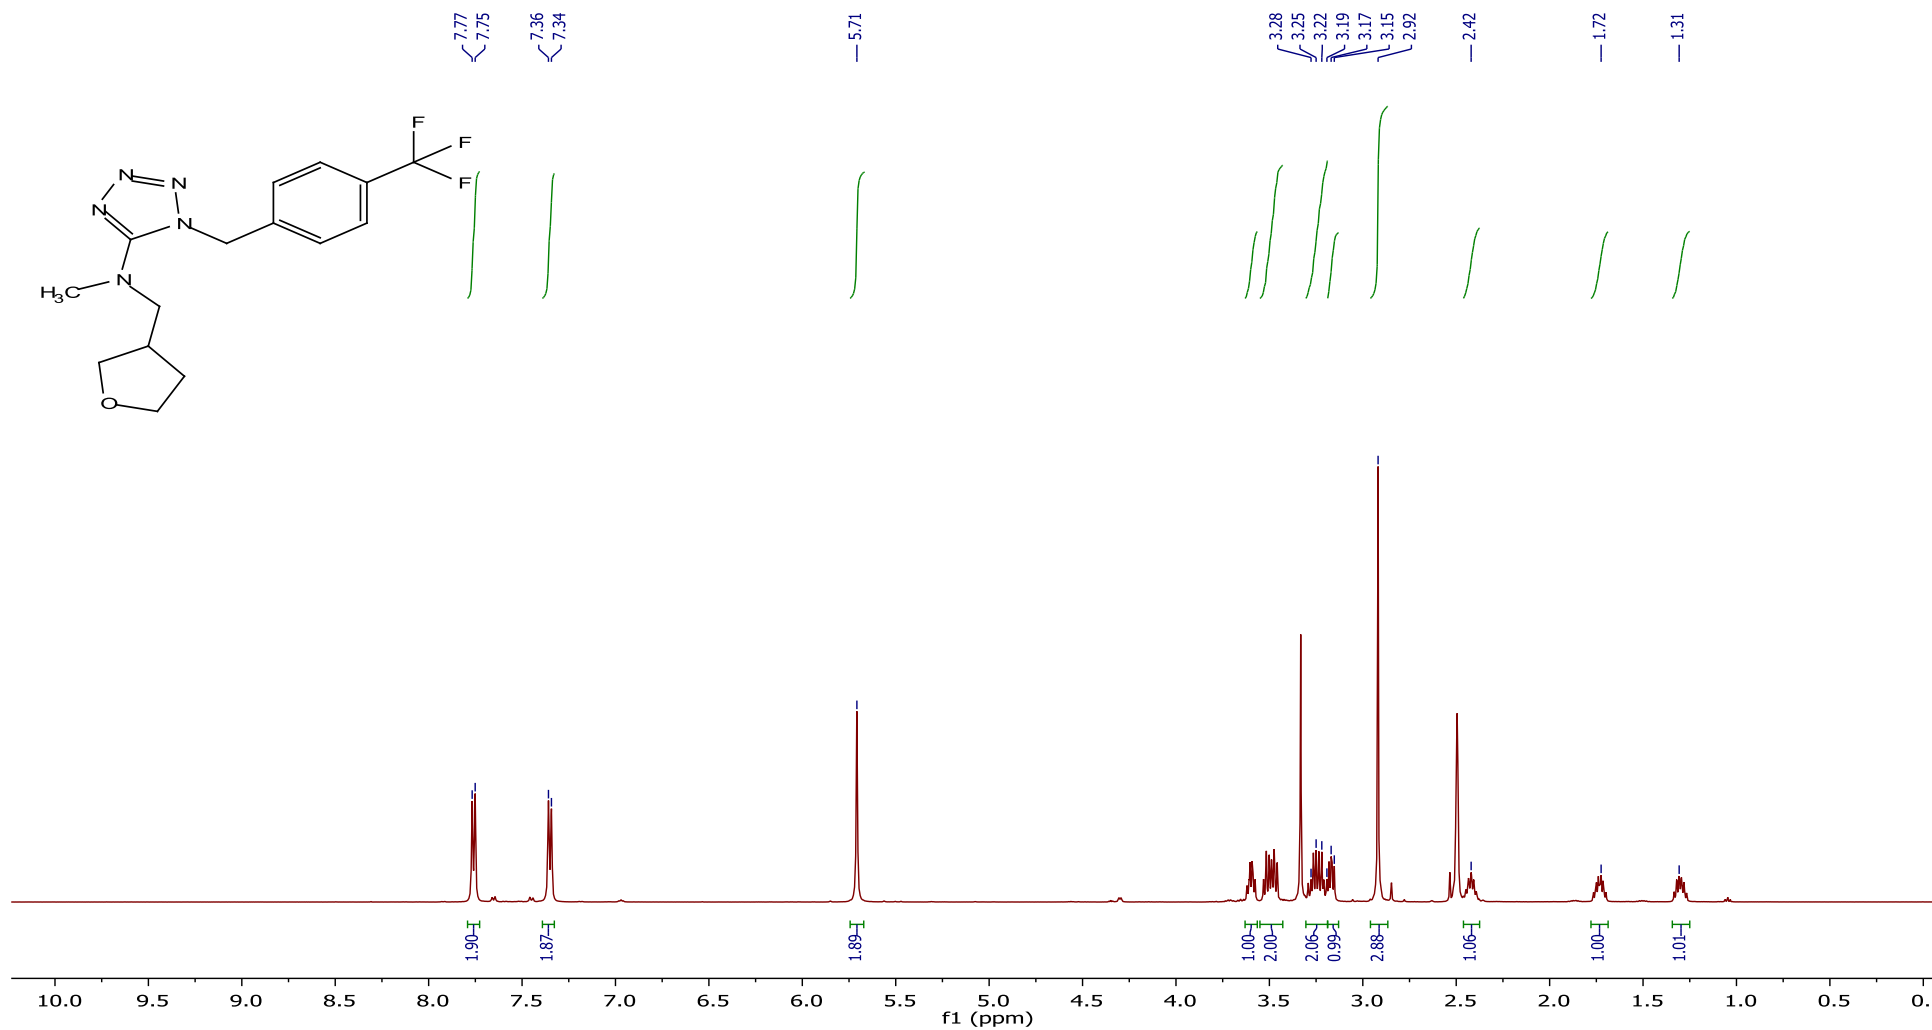



$^{13}\text{C}$  NMR spectrum of the compound **9**{55,337}.

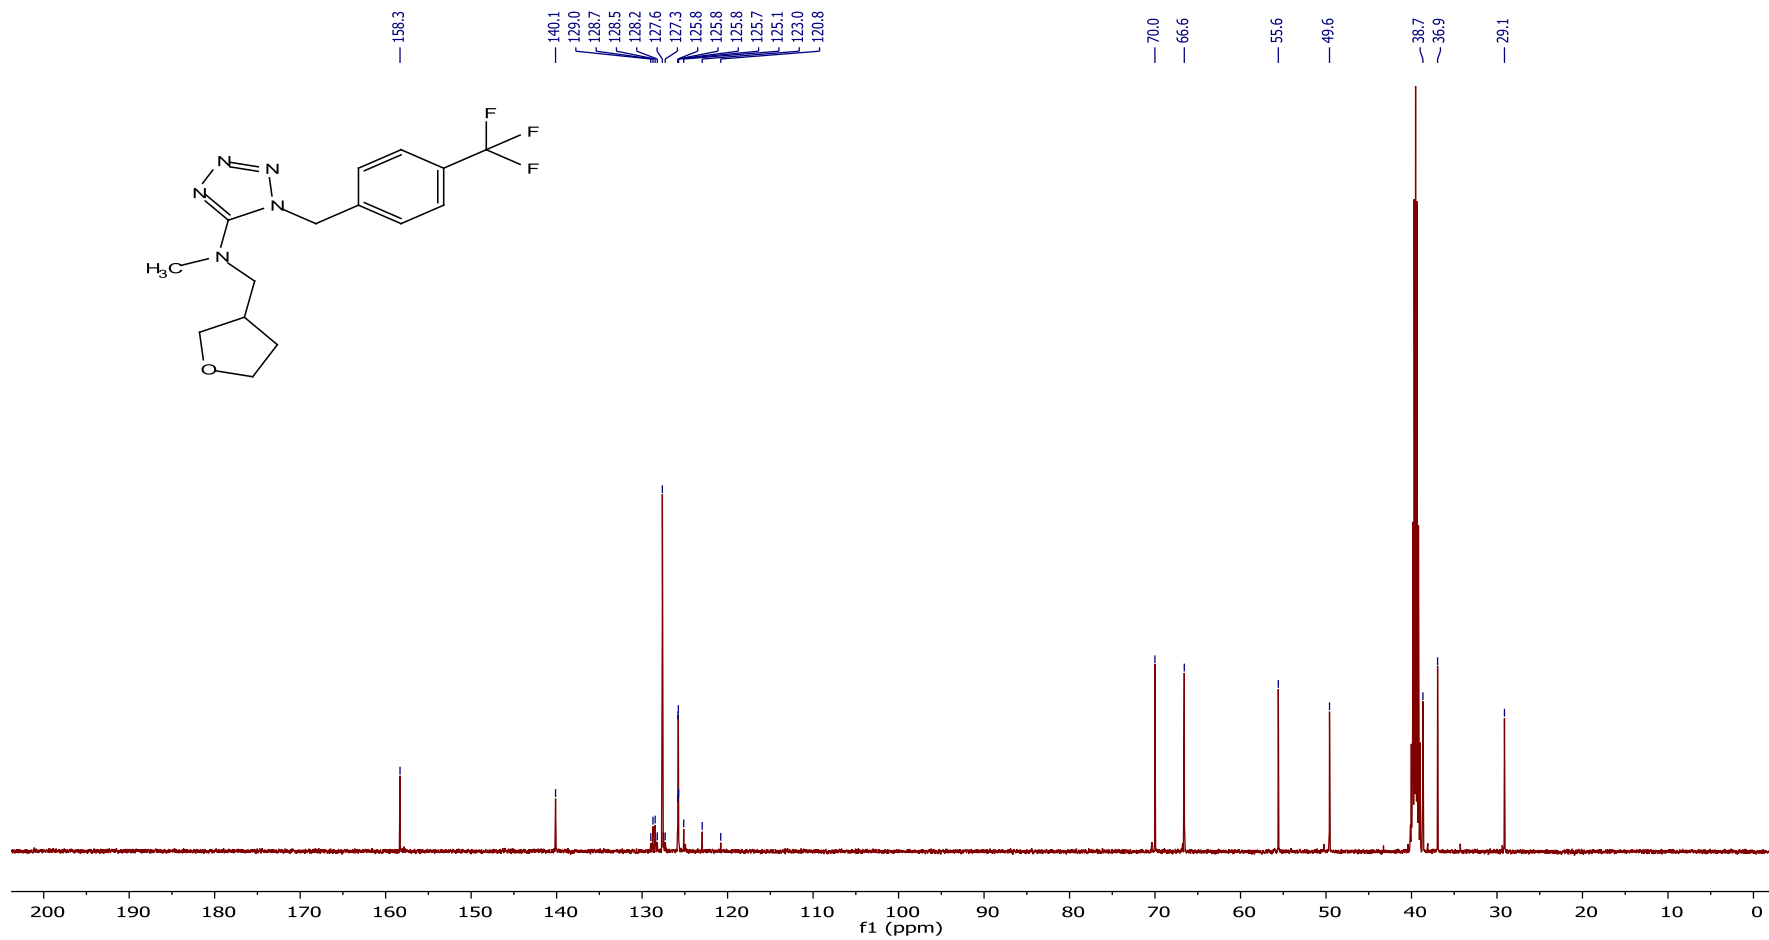

$^{19}\text{F}$  NMR spectrum of the compound **9**{55,337}.

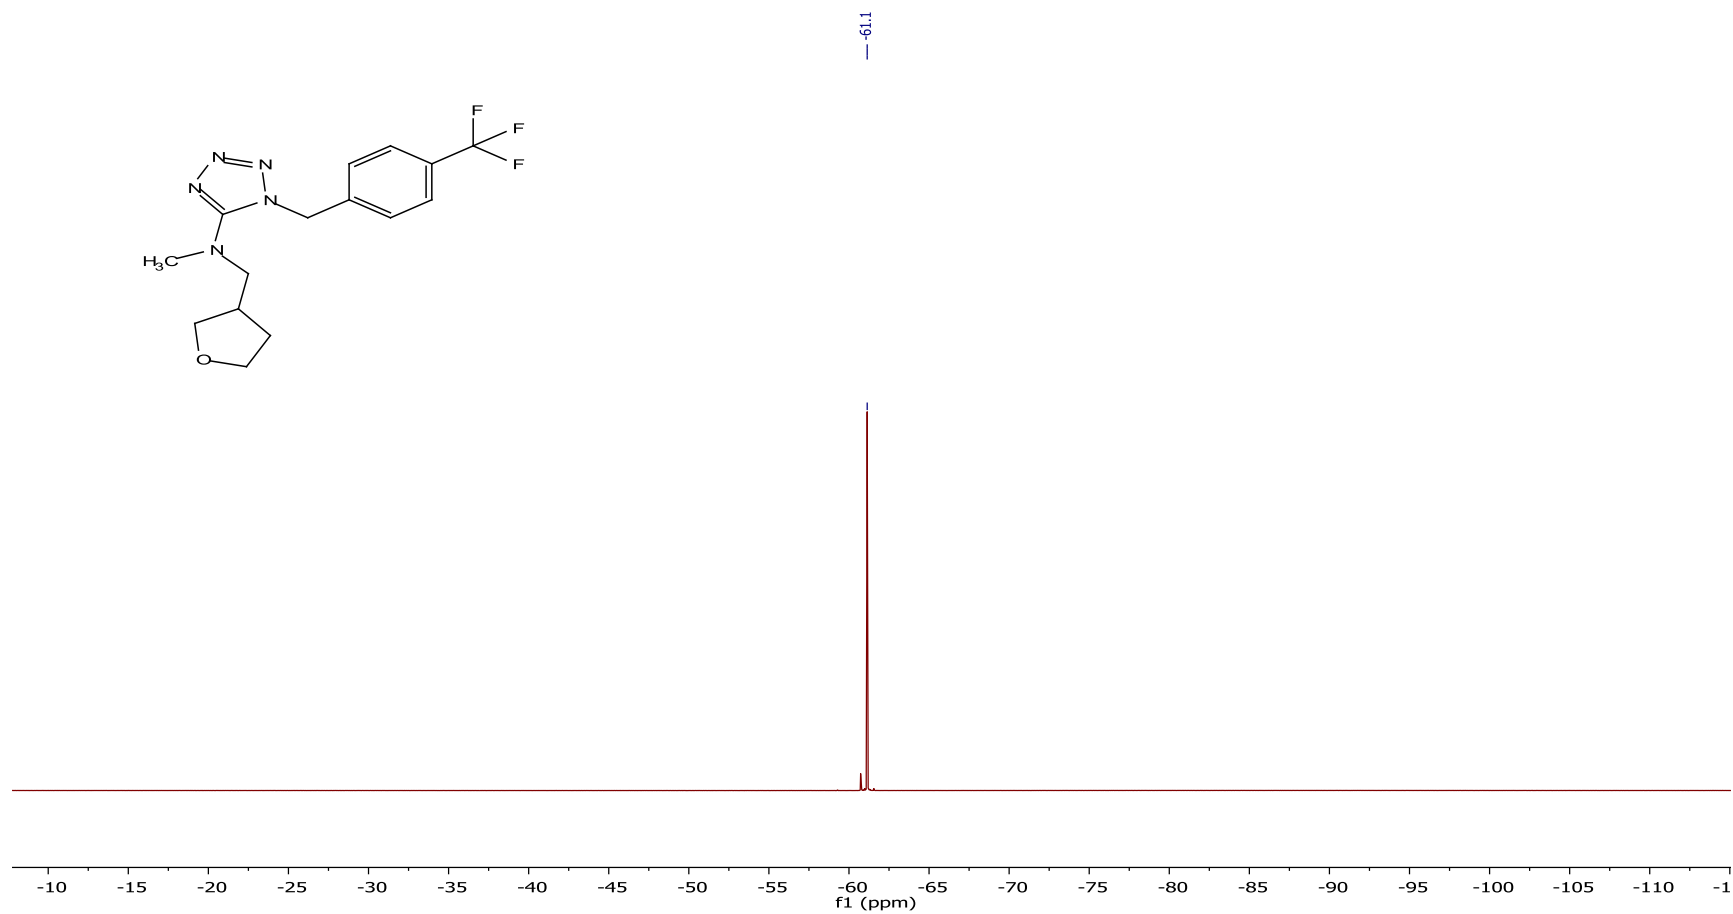

<sup>1</sup>H NMR spectrum of the compound **9**{57,261}.

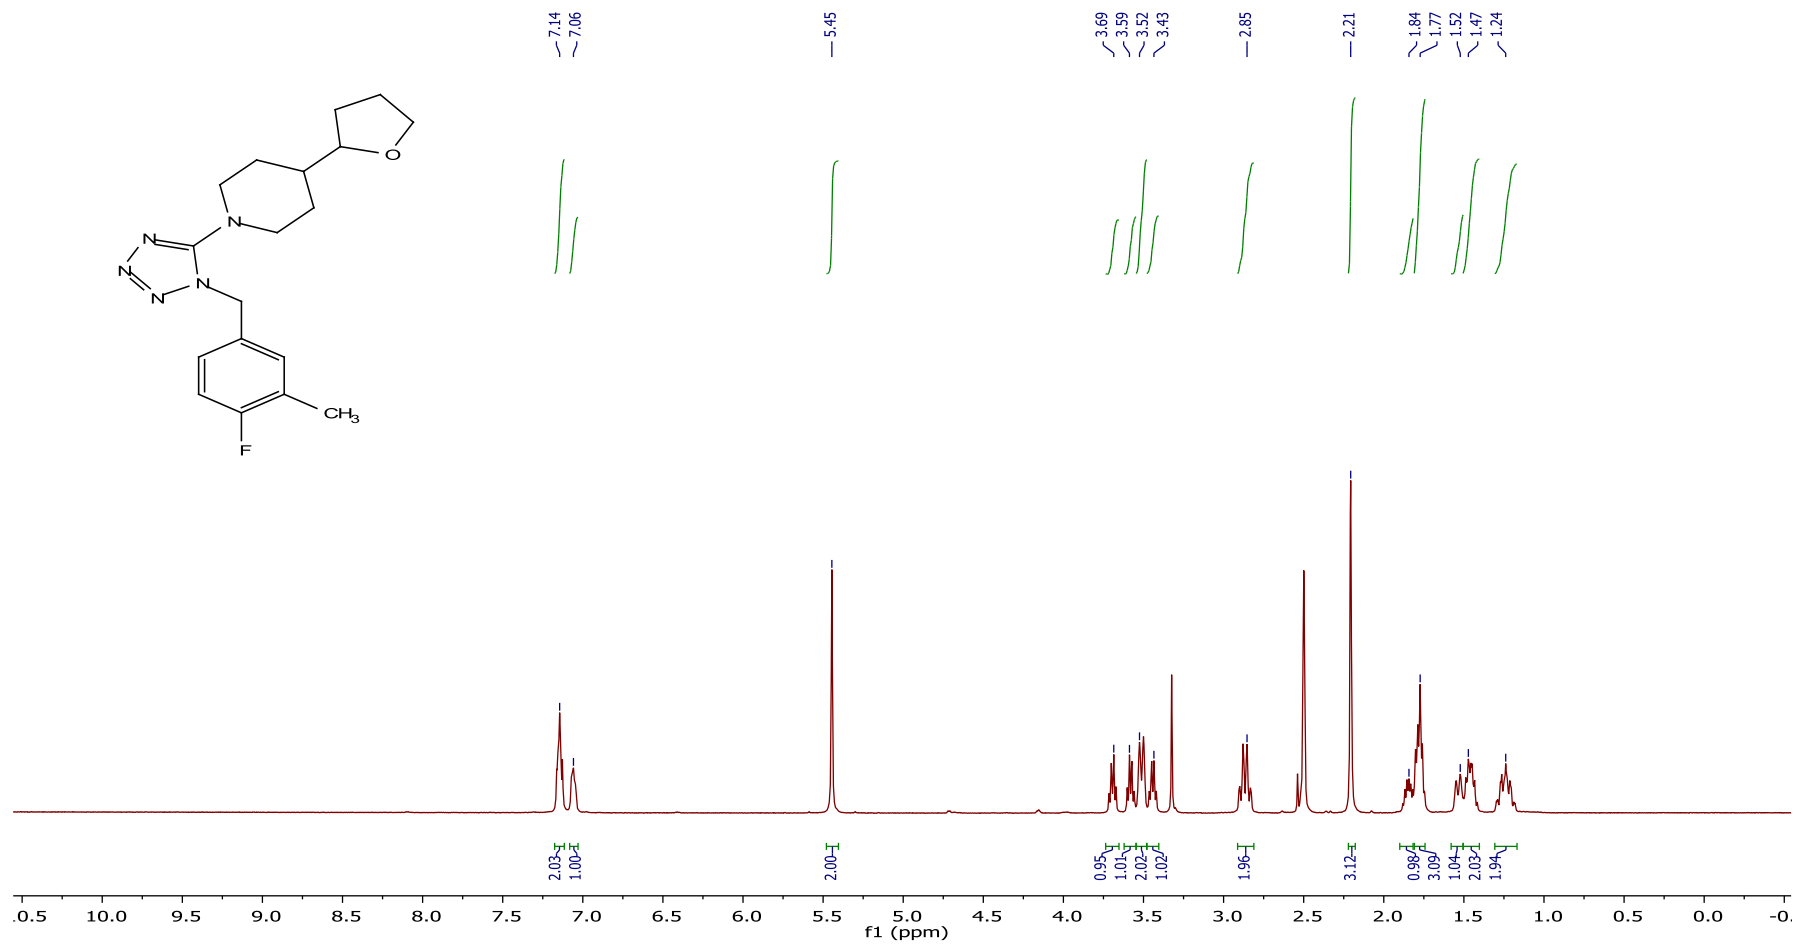

$^{13}\text{C}$  NMR spectrum of the compound **9**{57,261}.

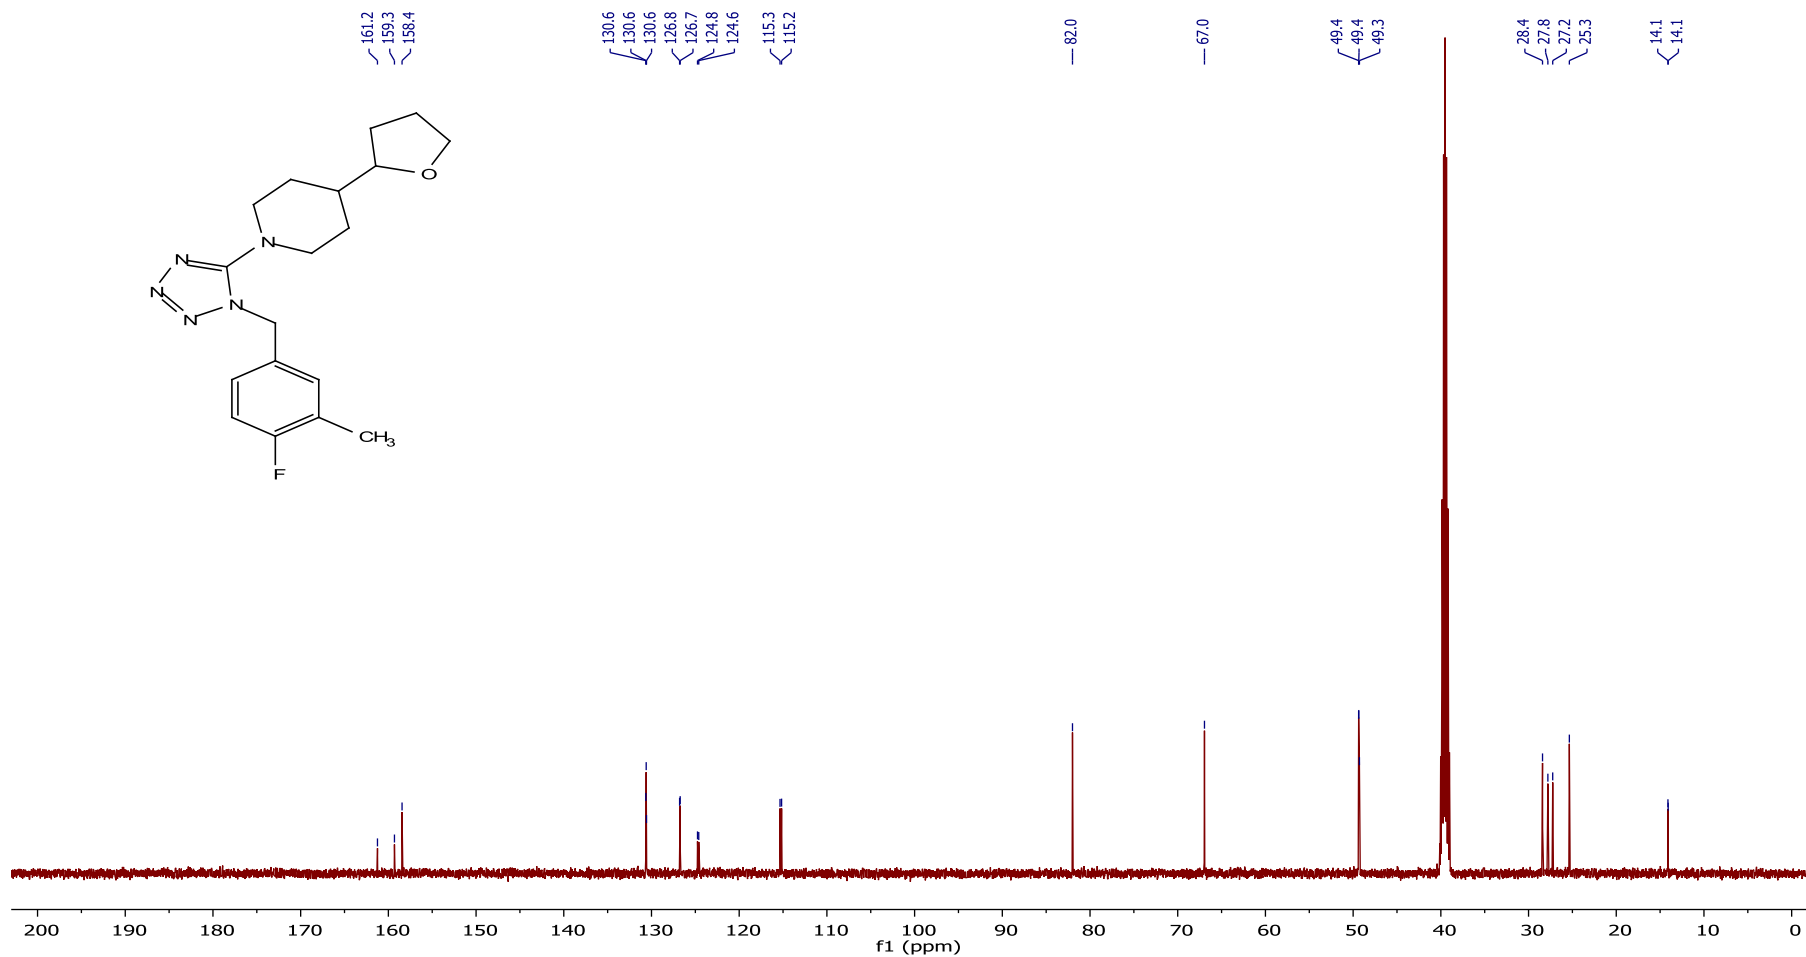

$^{19}\text{F}$  NMR spectrum of the compound **9**{57,261}.

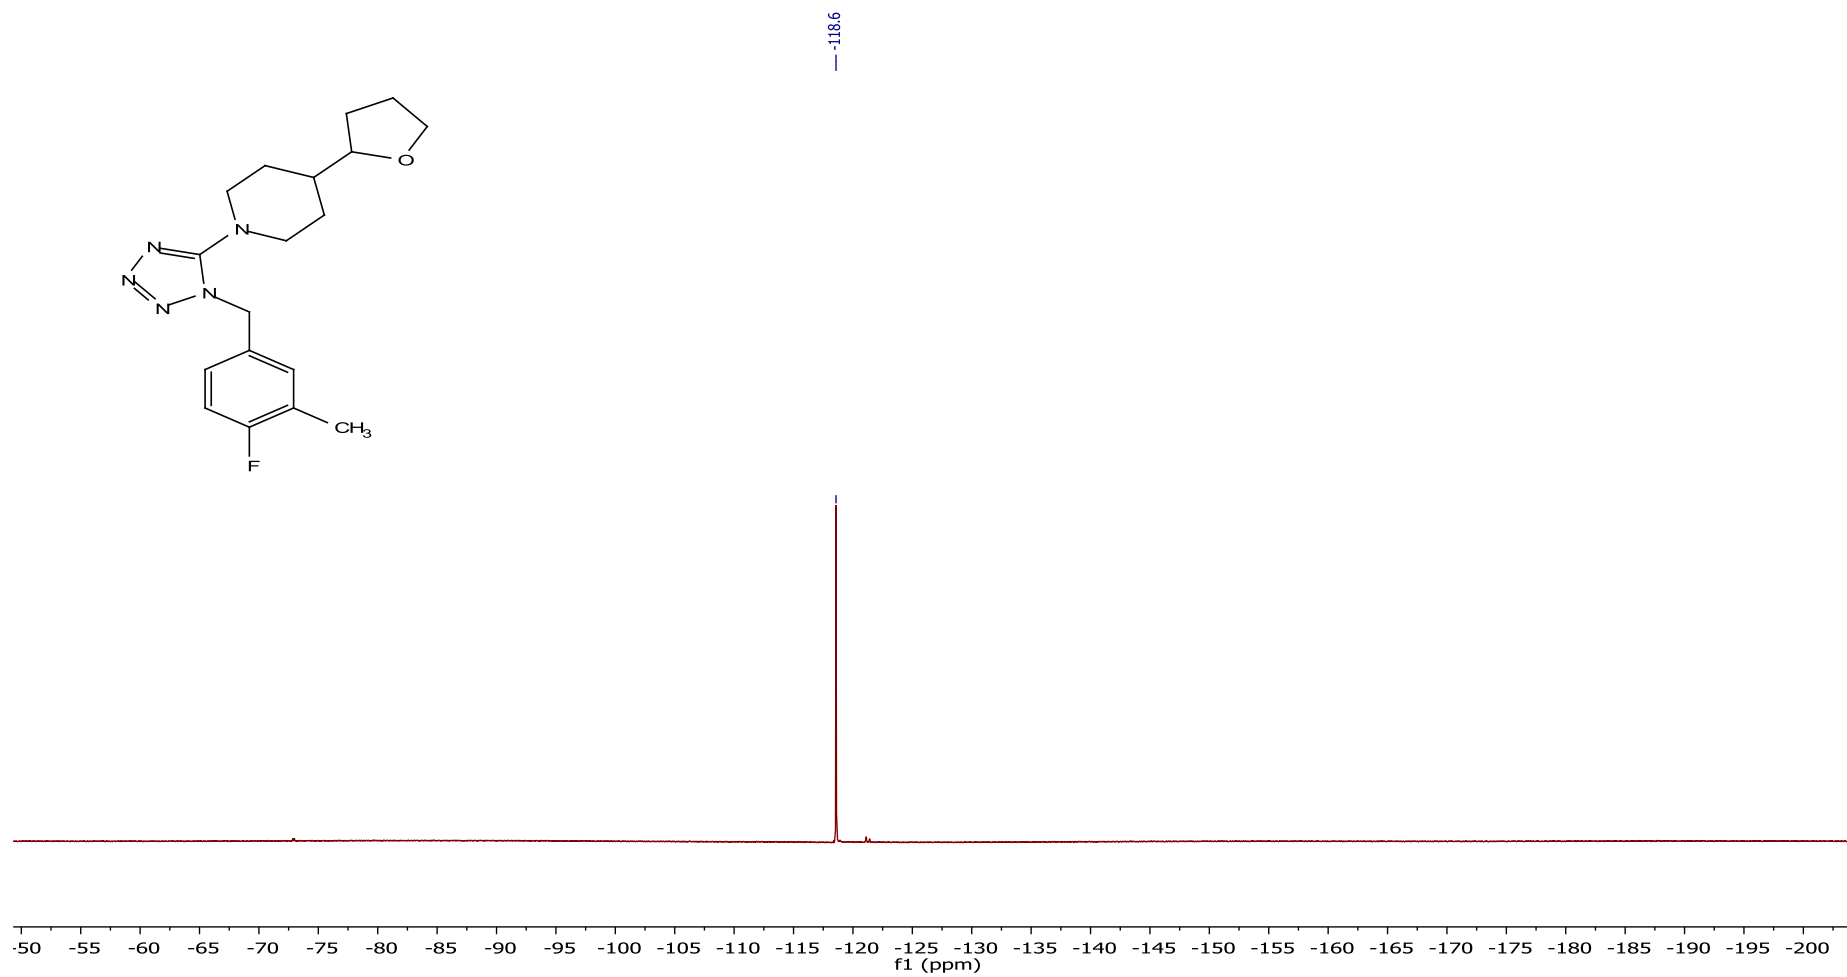

<sup>1</sup>H NMR spectrum of the compound **9**{57,300}.

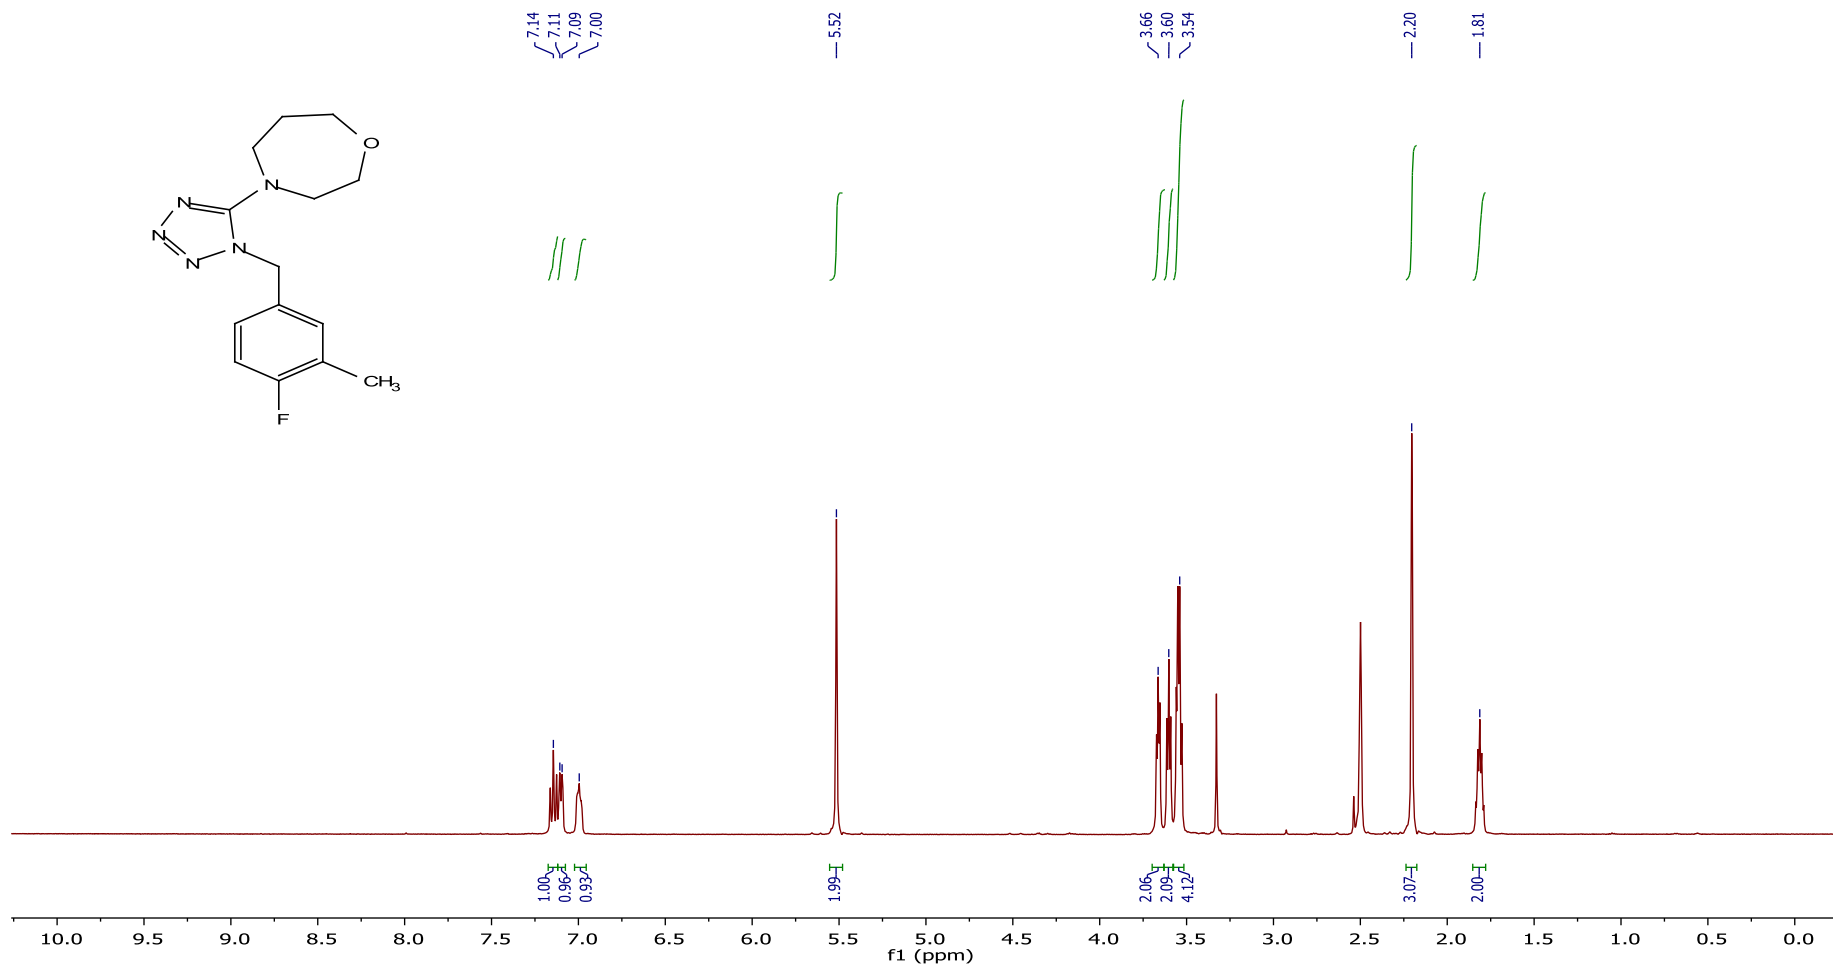

$^{13}\text{C}$  NMR spectrum of the compound **9**{57,300}.

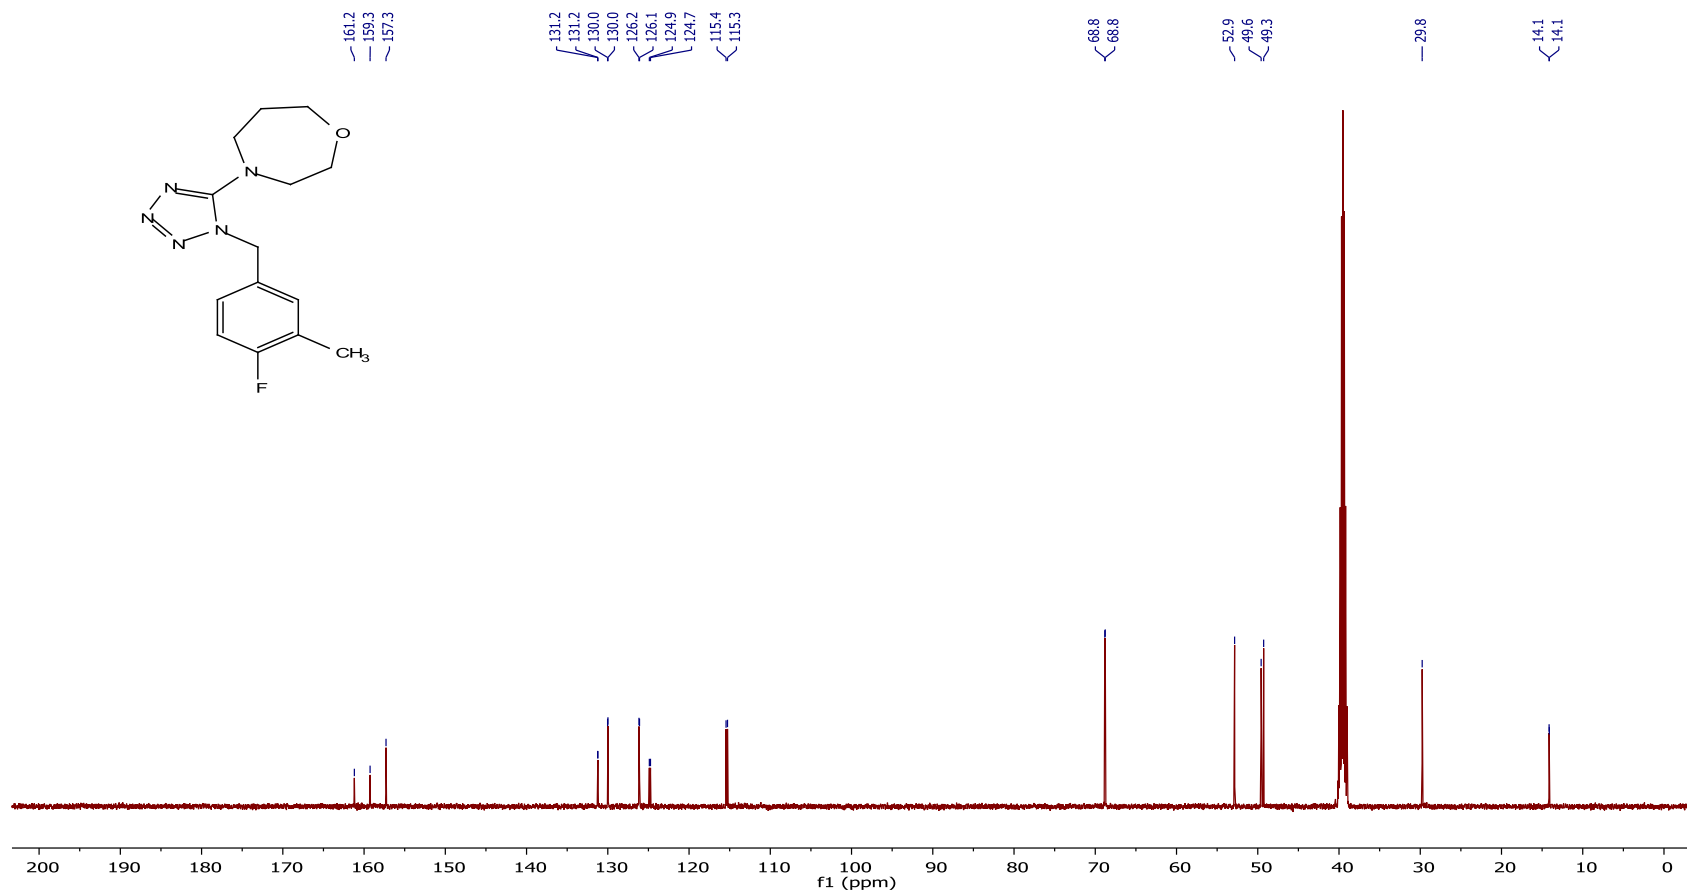

$^{19}\text{F}$  NMR spectrum of the compound **9**{57,300}.

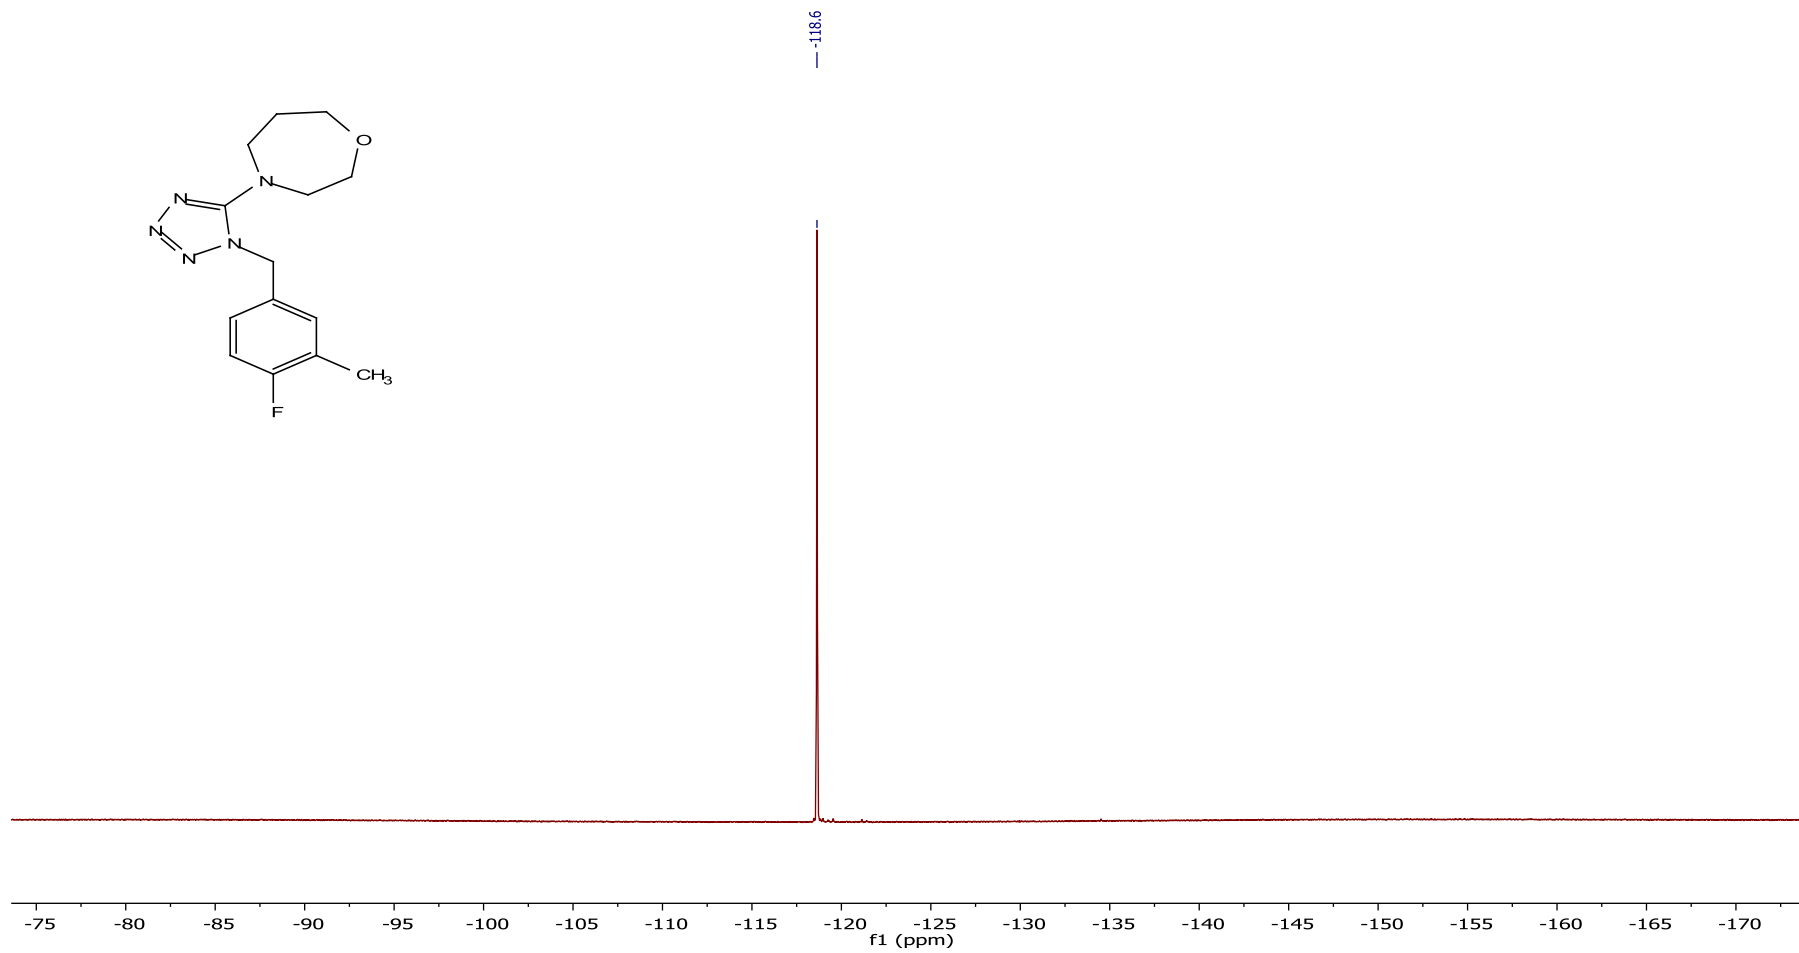



<sup>1</sup>H NMR spectrum of the compound **9**{63,327}.

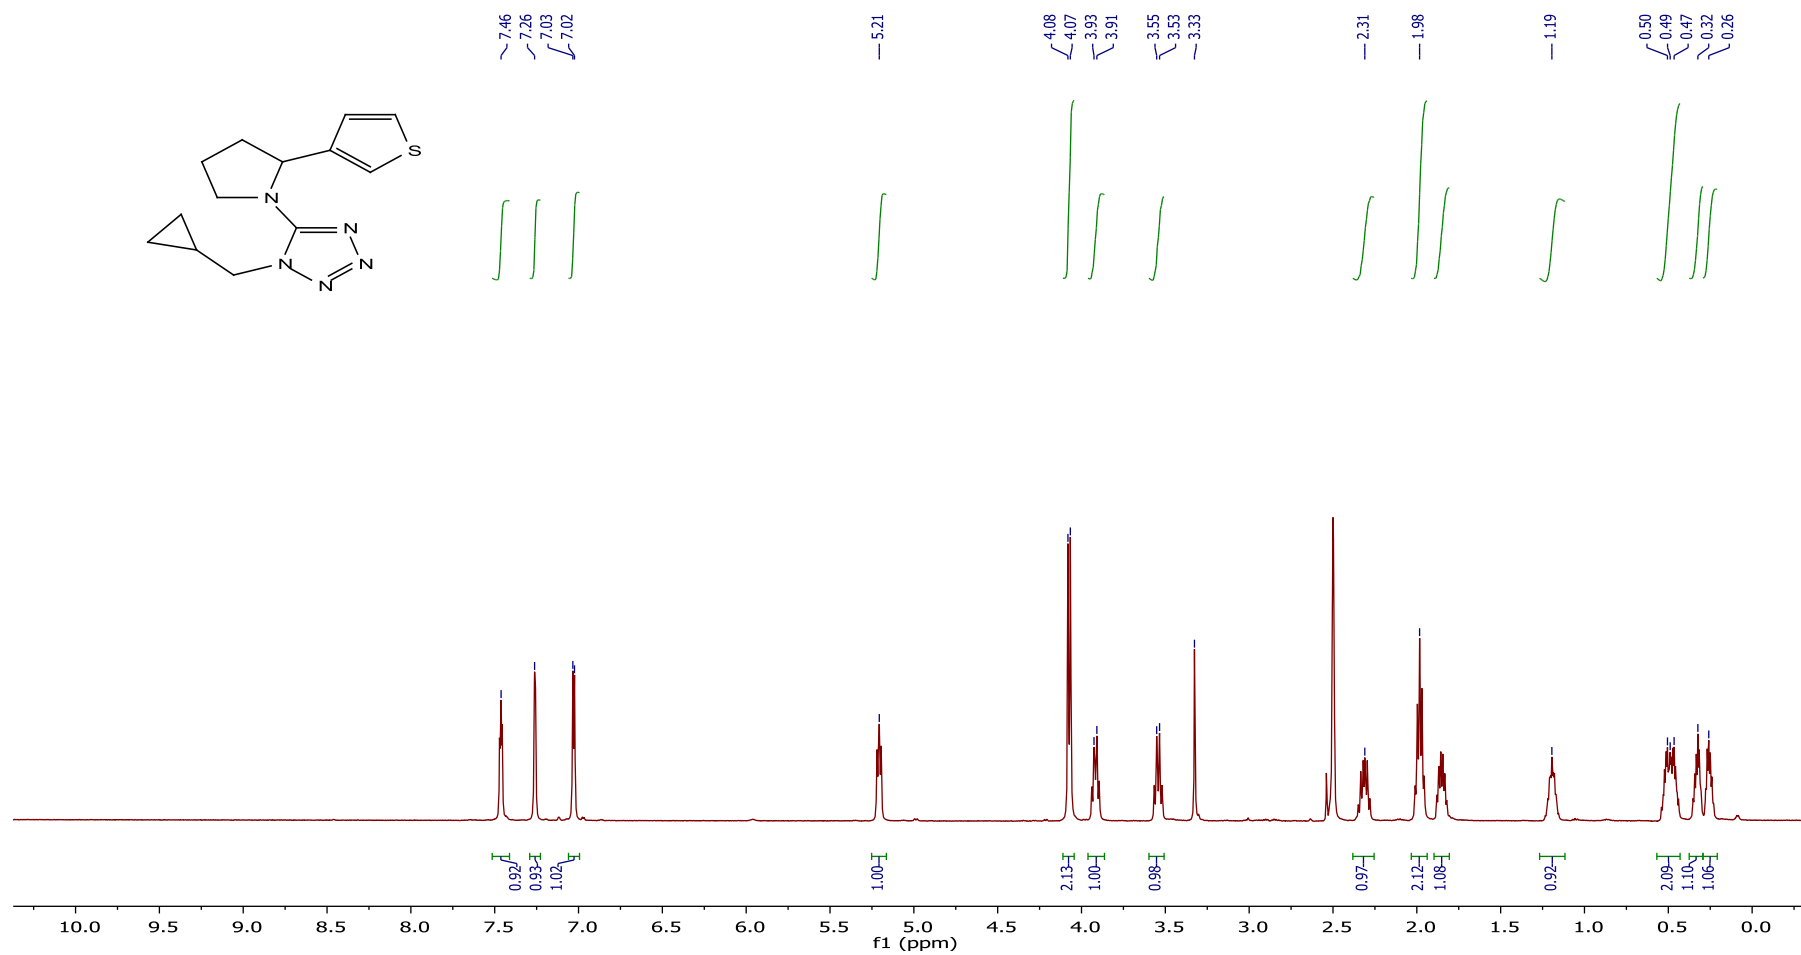

$^{13}\text{C}$  NMR spectrum of the compound **9**{63,327}.

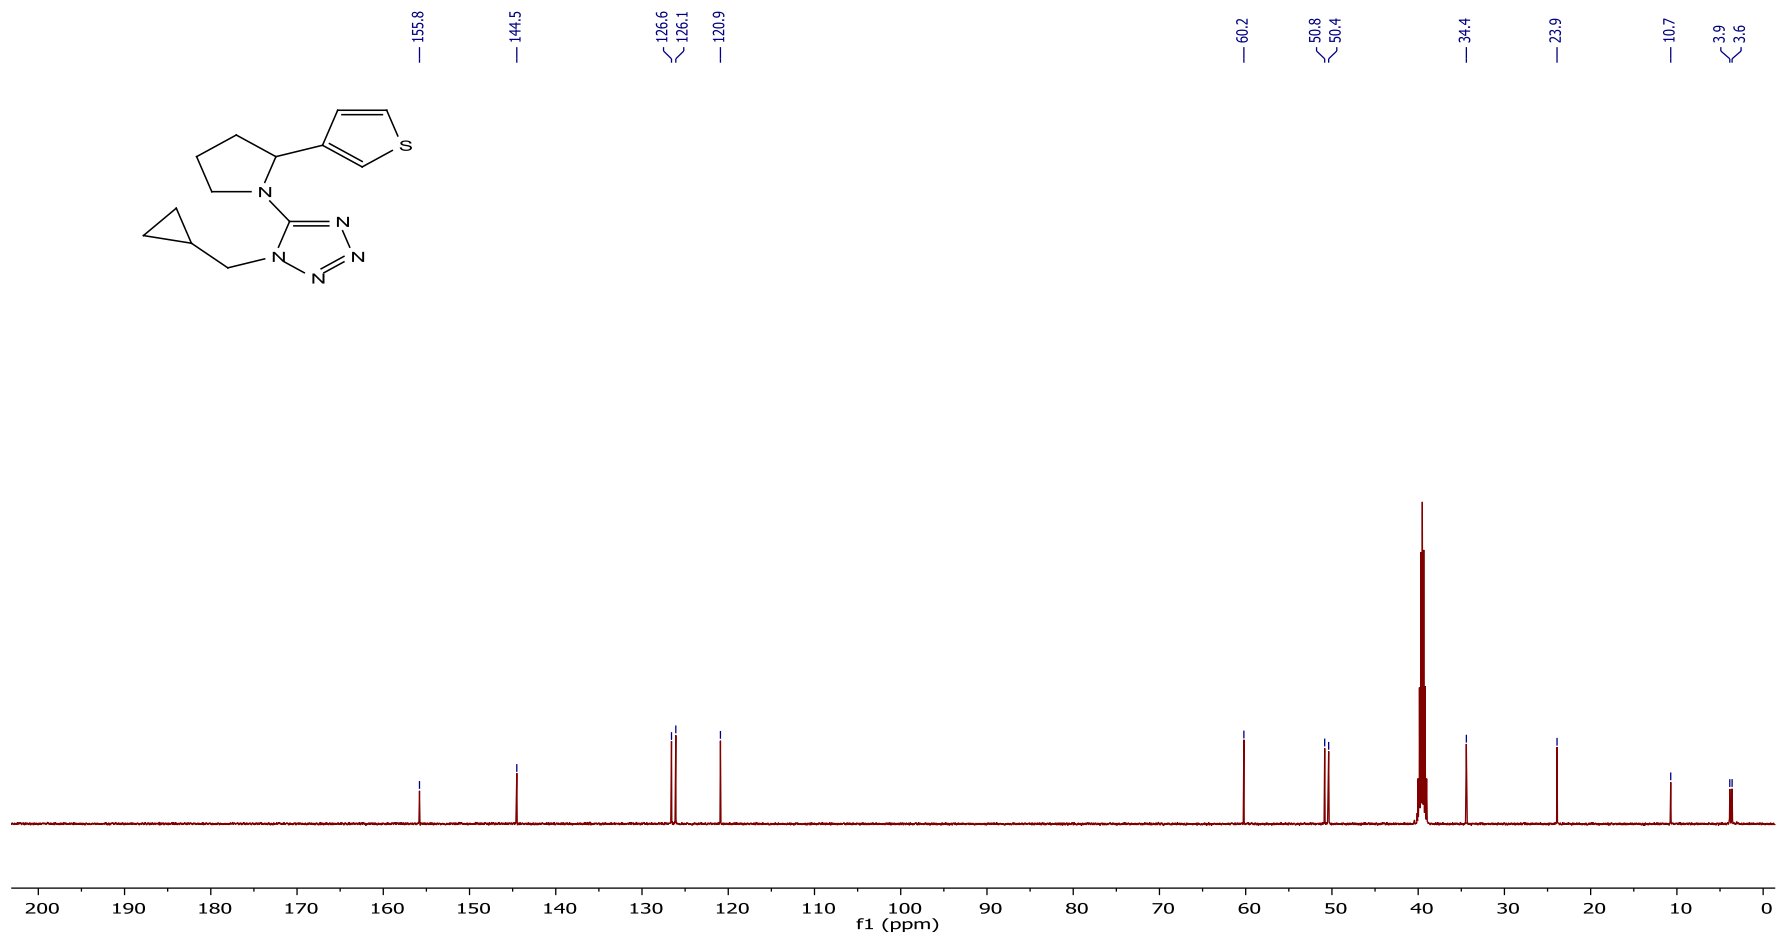

<sup>1</sup>H NMR spectrum of the compound **9**{68,300}.

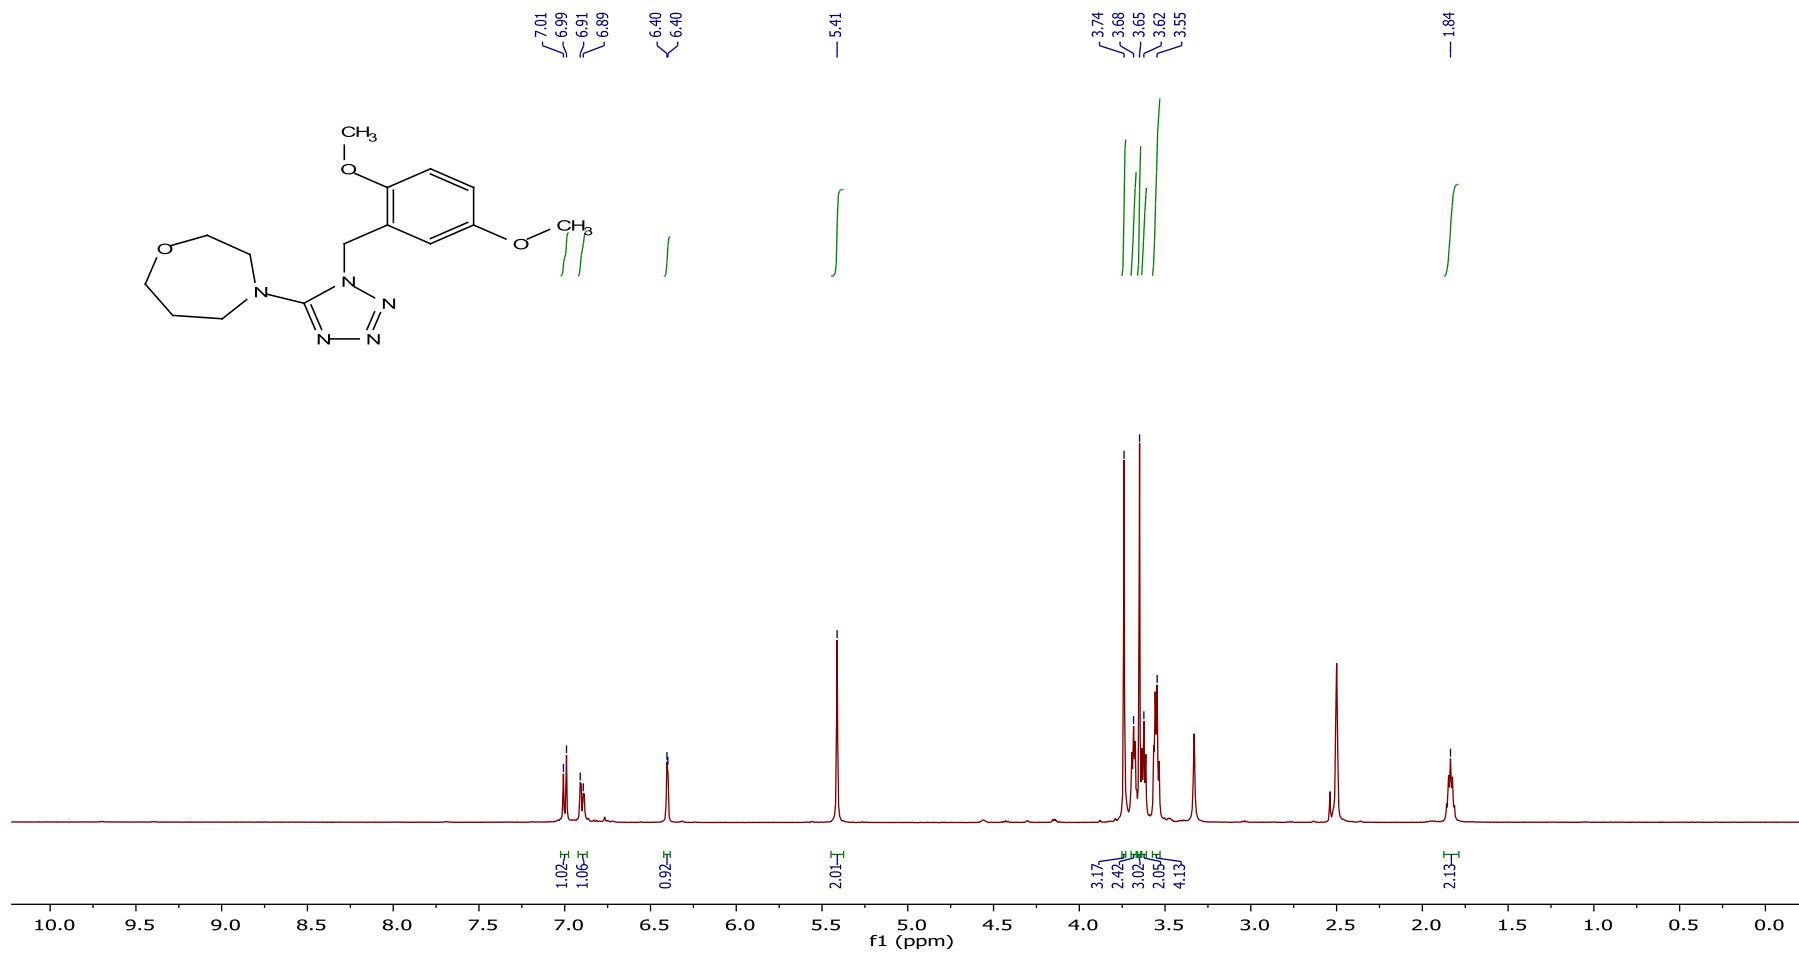

$^{13}\text{C}$  NMR spectrum of the compound **9**{68,300}.

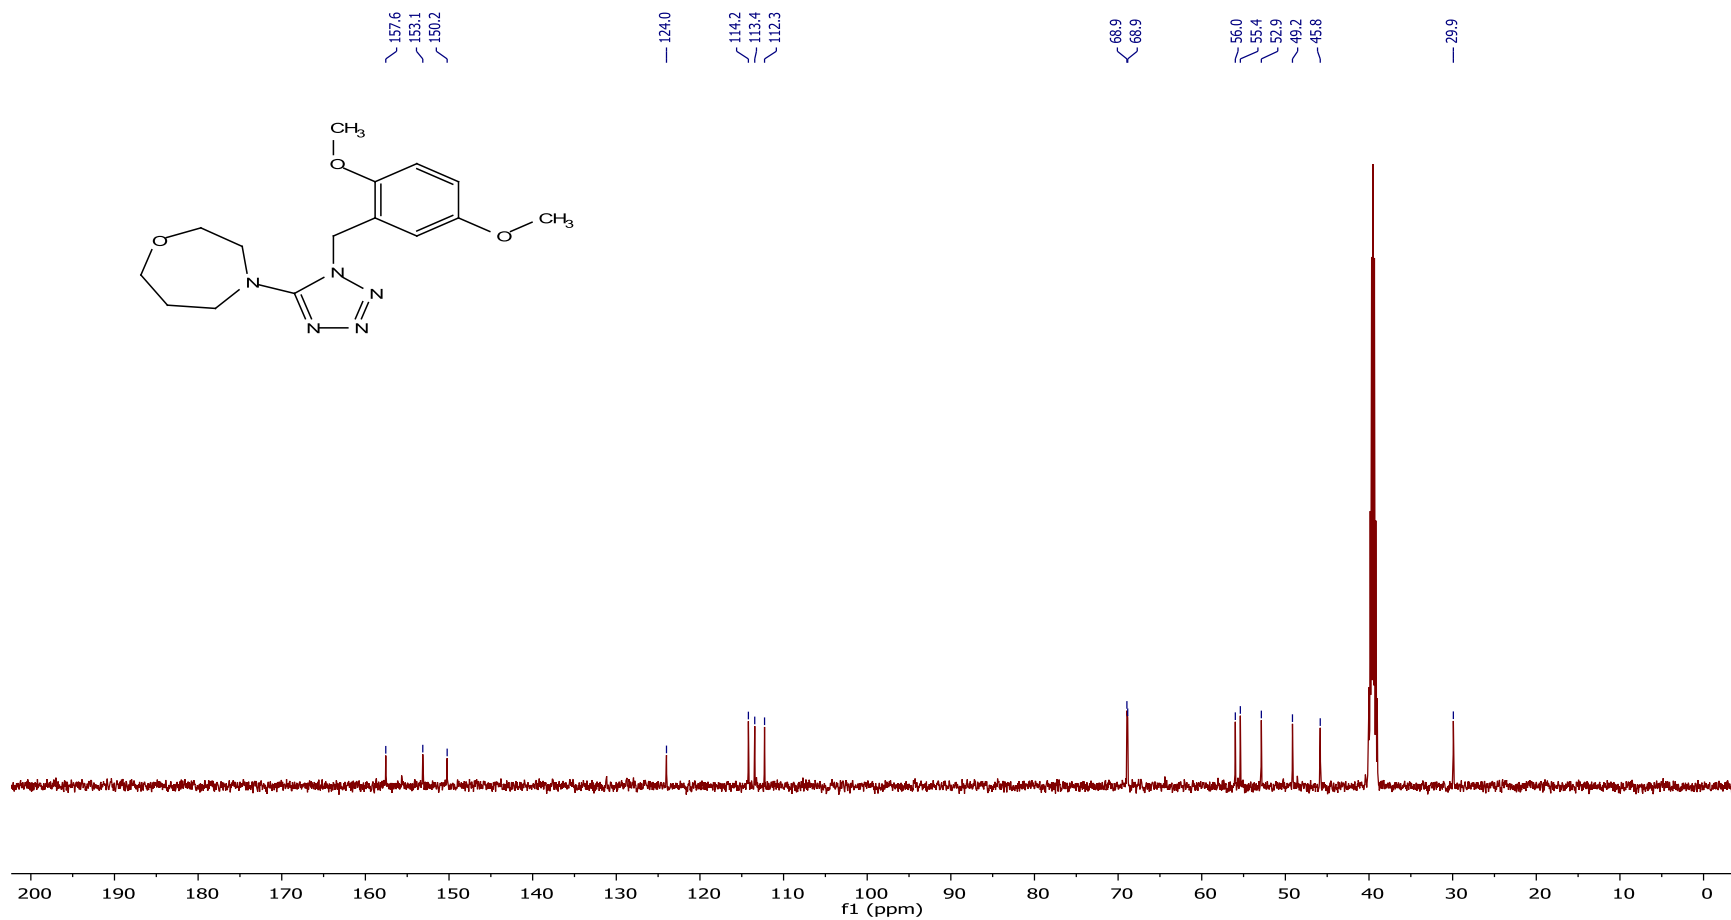

<sup>1</sup>H NMR spectrum of the compound **9**{77,363}.

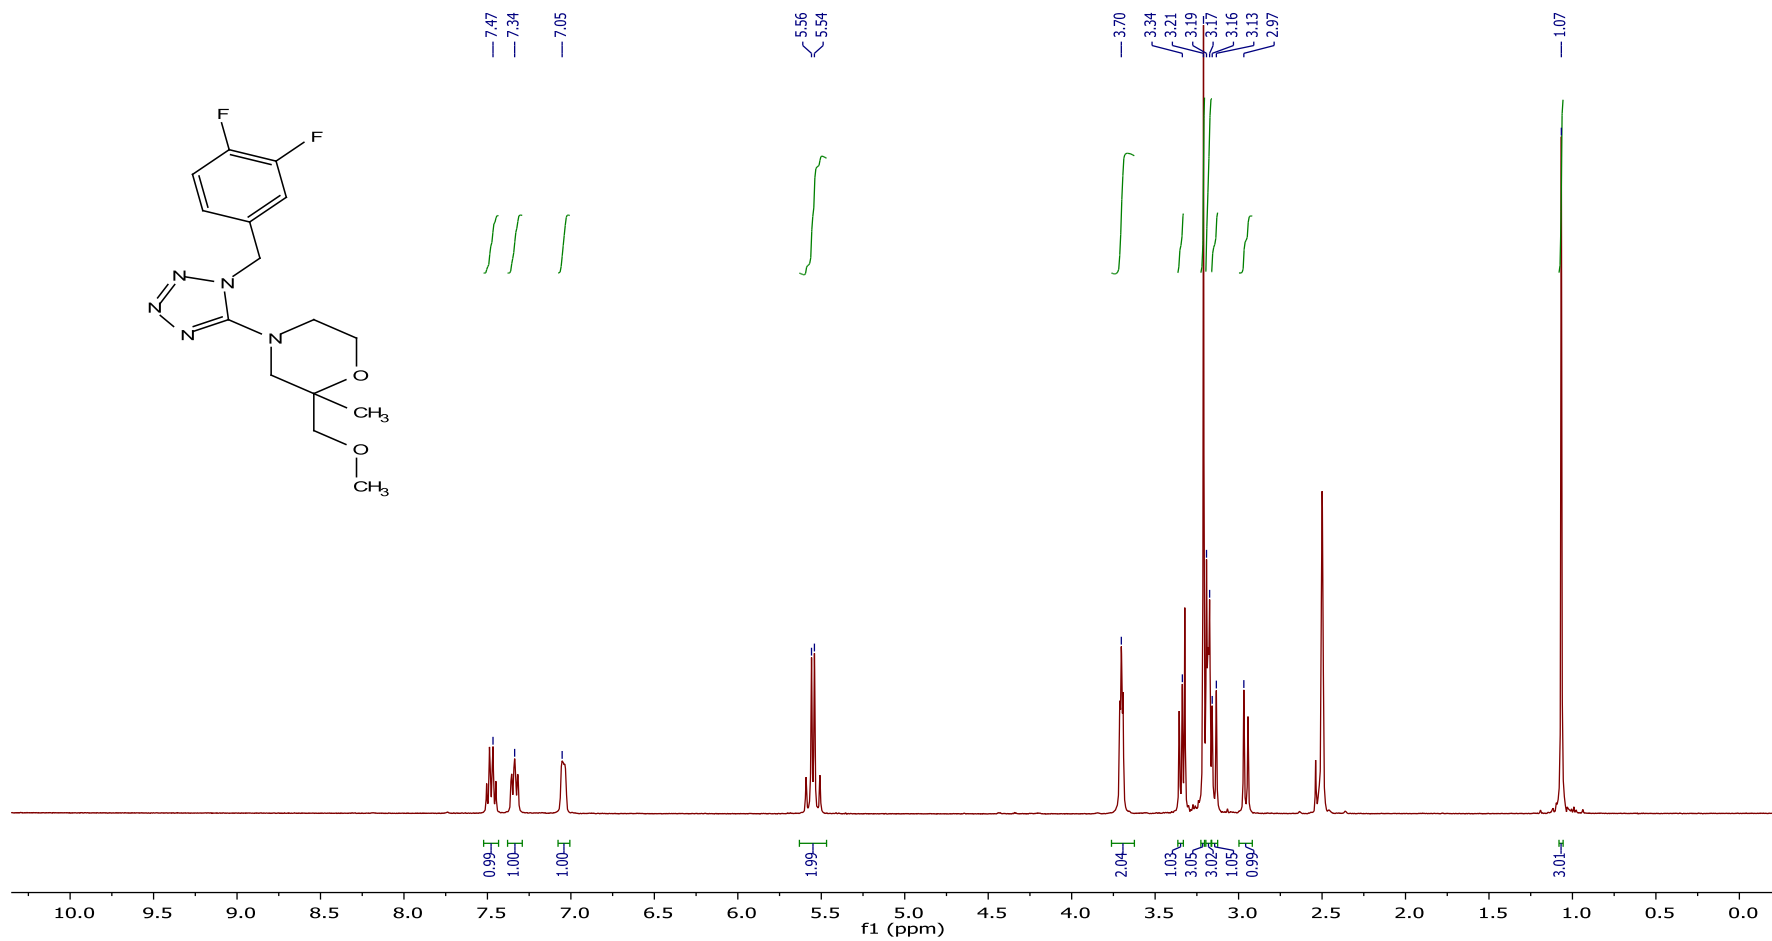

$^{13}\text{C}$  NMR spectrum of the compound **9**{77,363}.

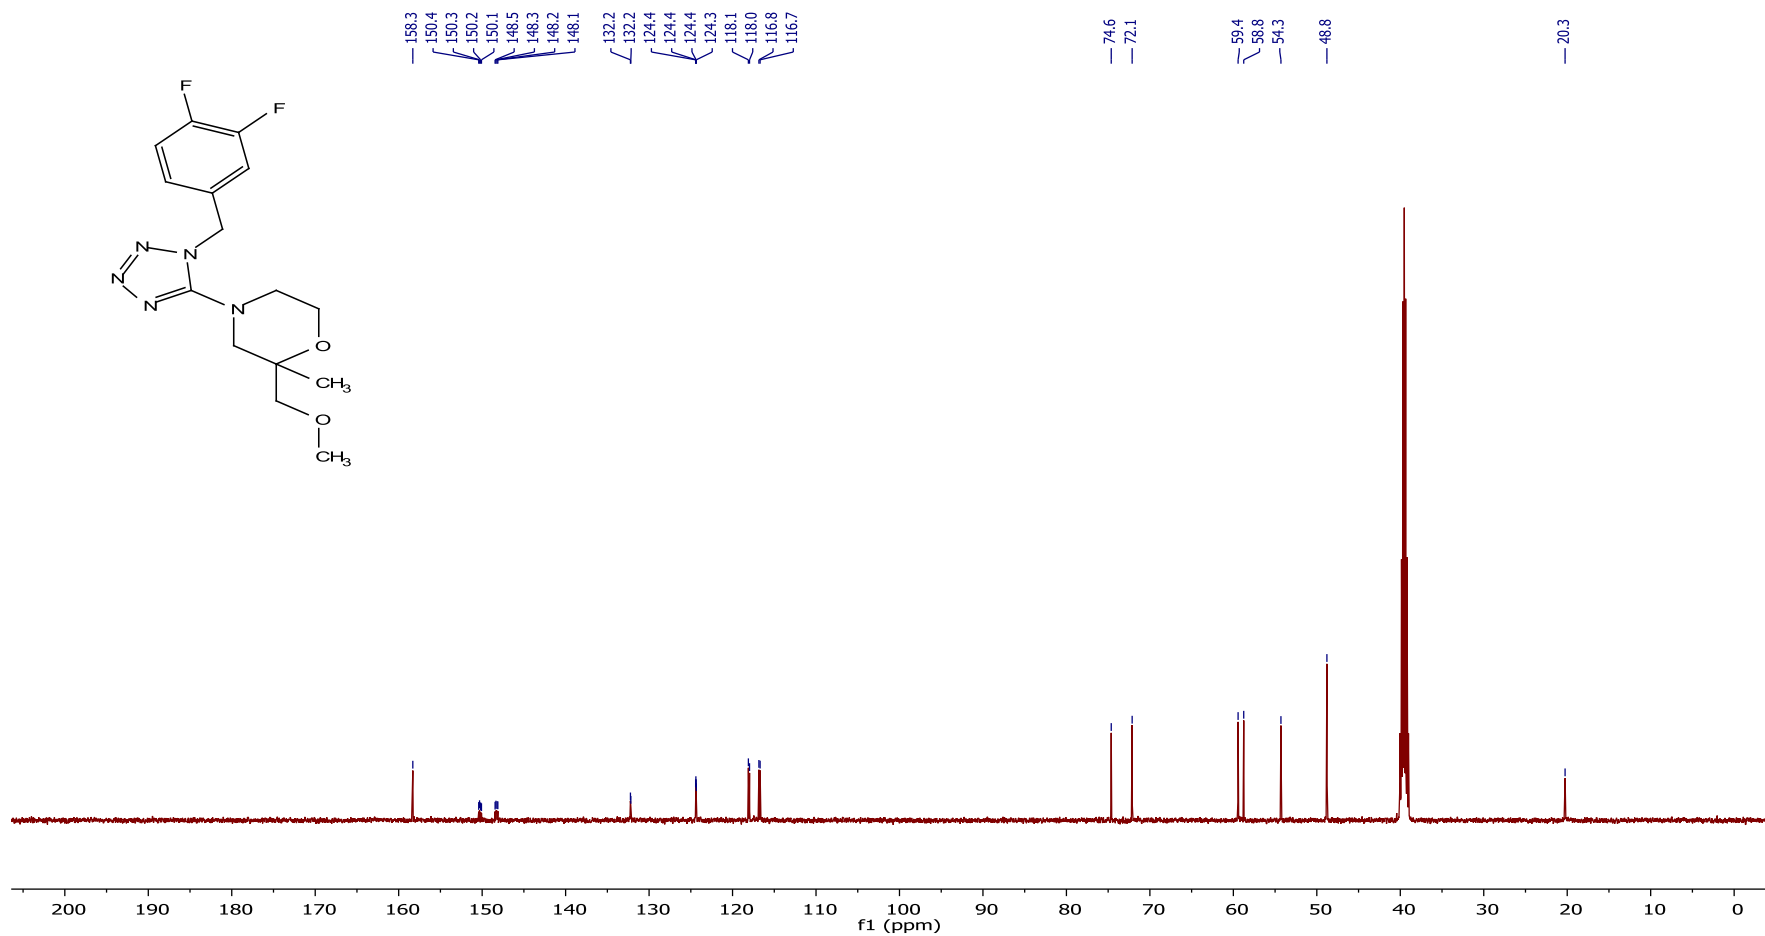

$^{19}\text{F}$  NMR spectrum of the compound **9**{77,363}.

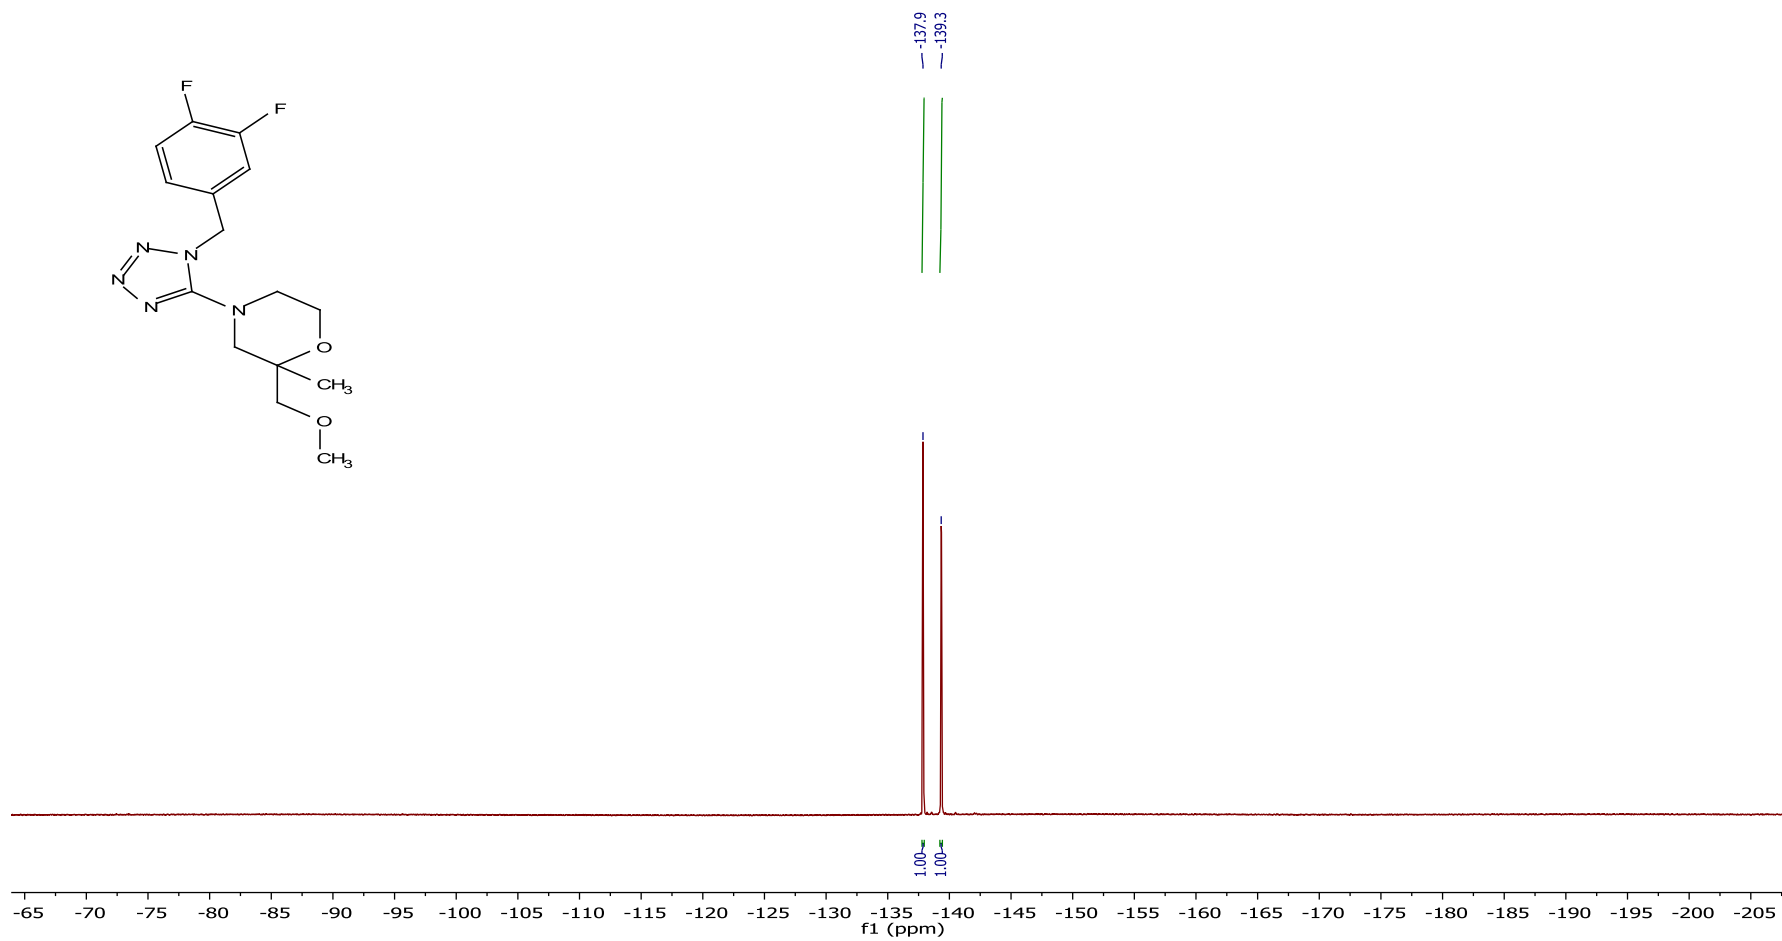

<sup>1</sup>H NMR spectrum of the compound **9**{84,319}.

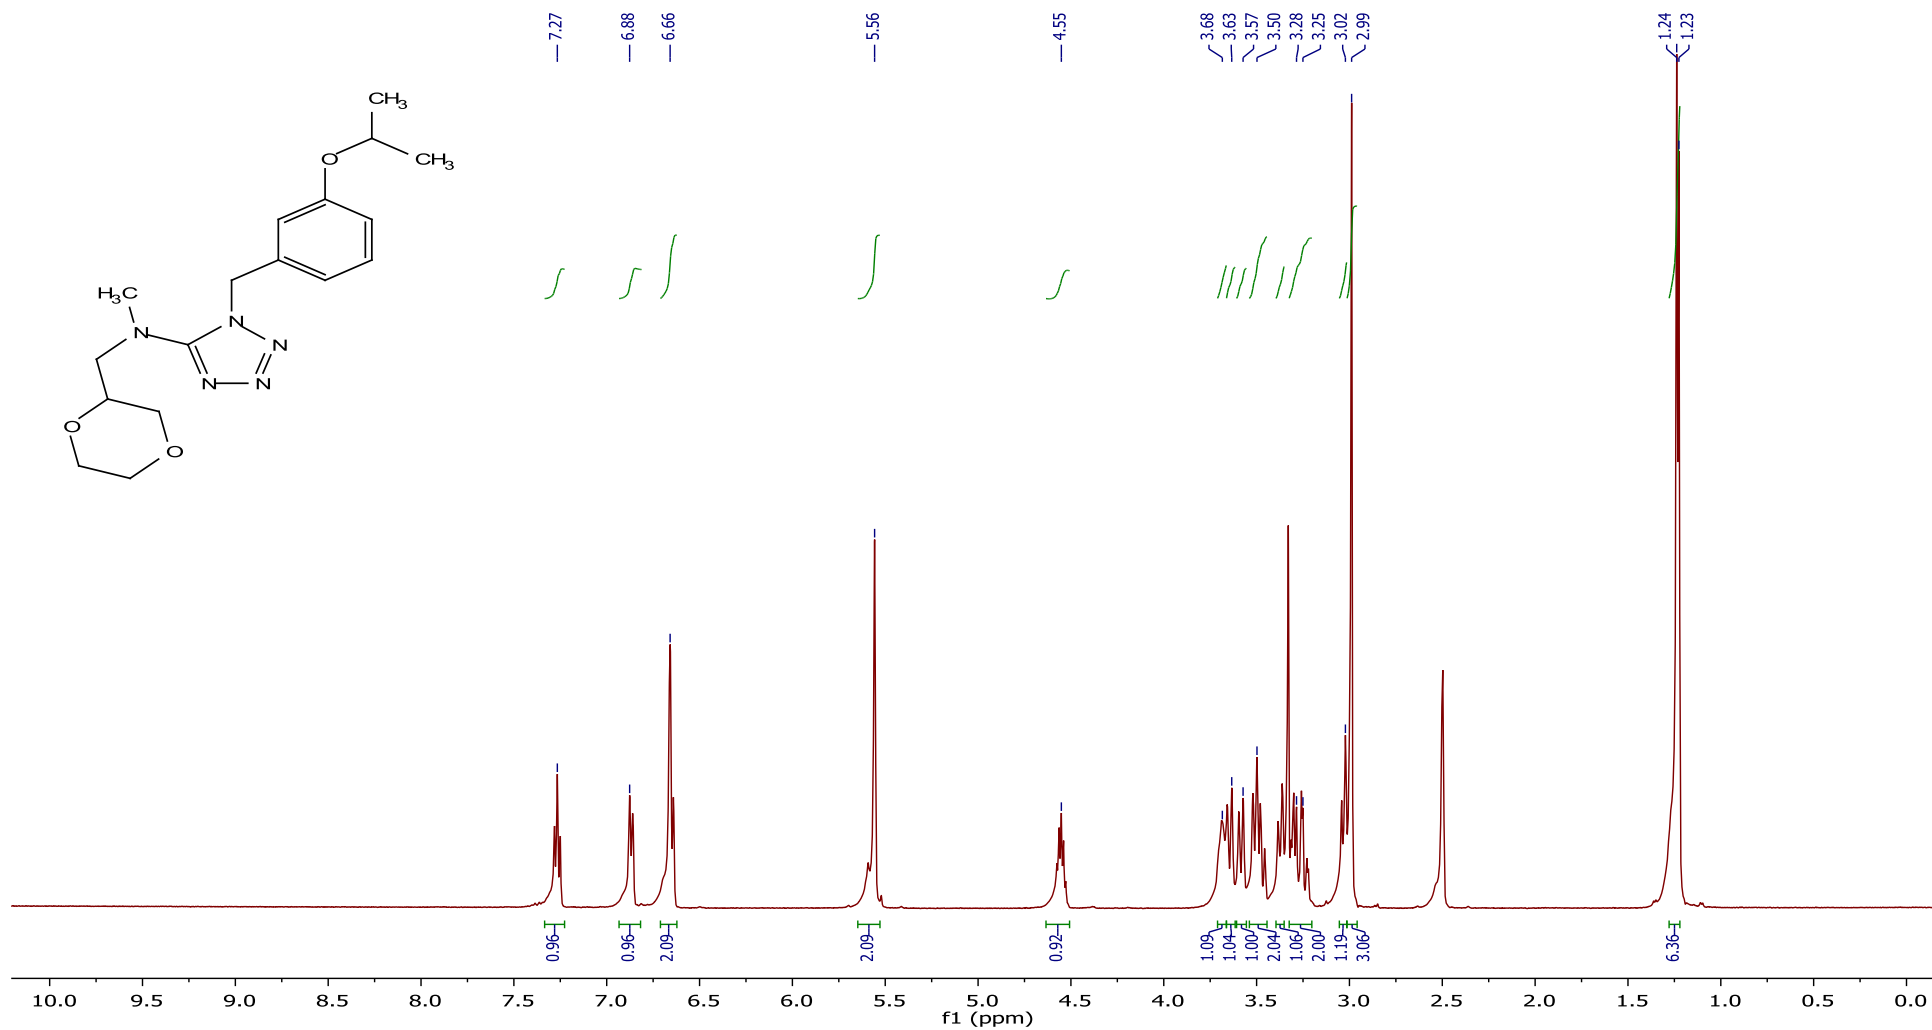



$^{13}\text{C}$  NMR spectrum of the compound **9**{84,319}.

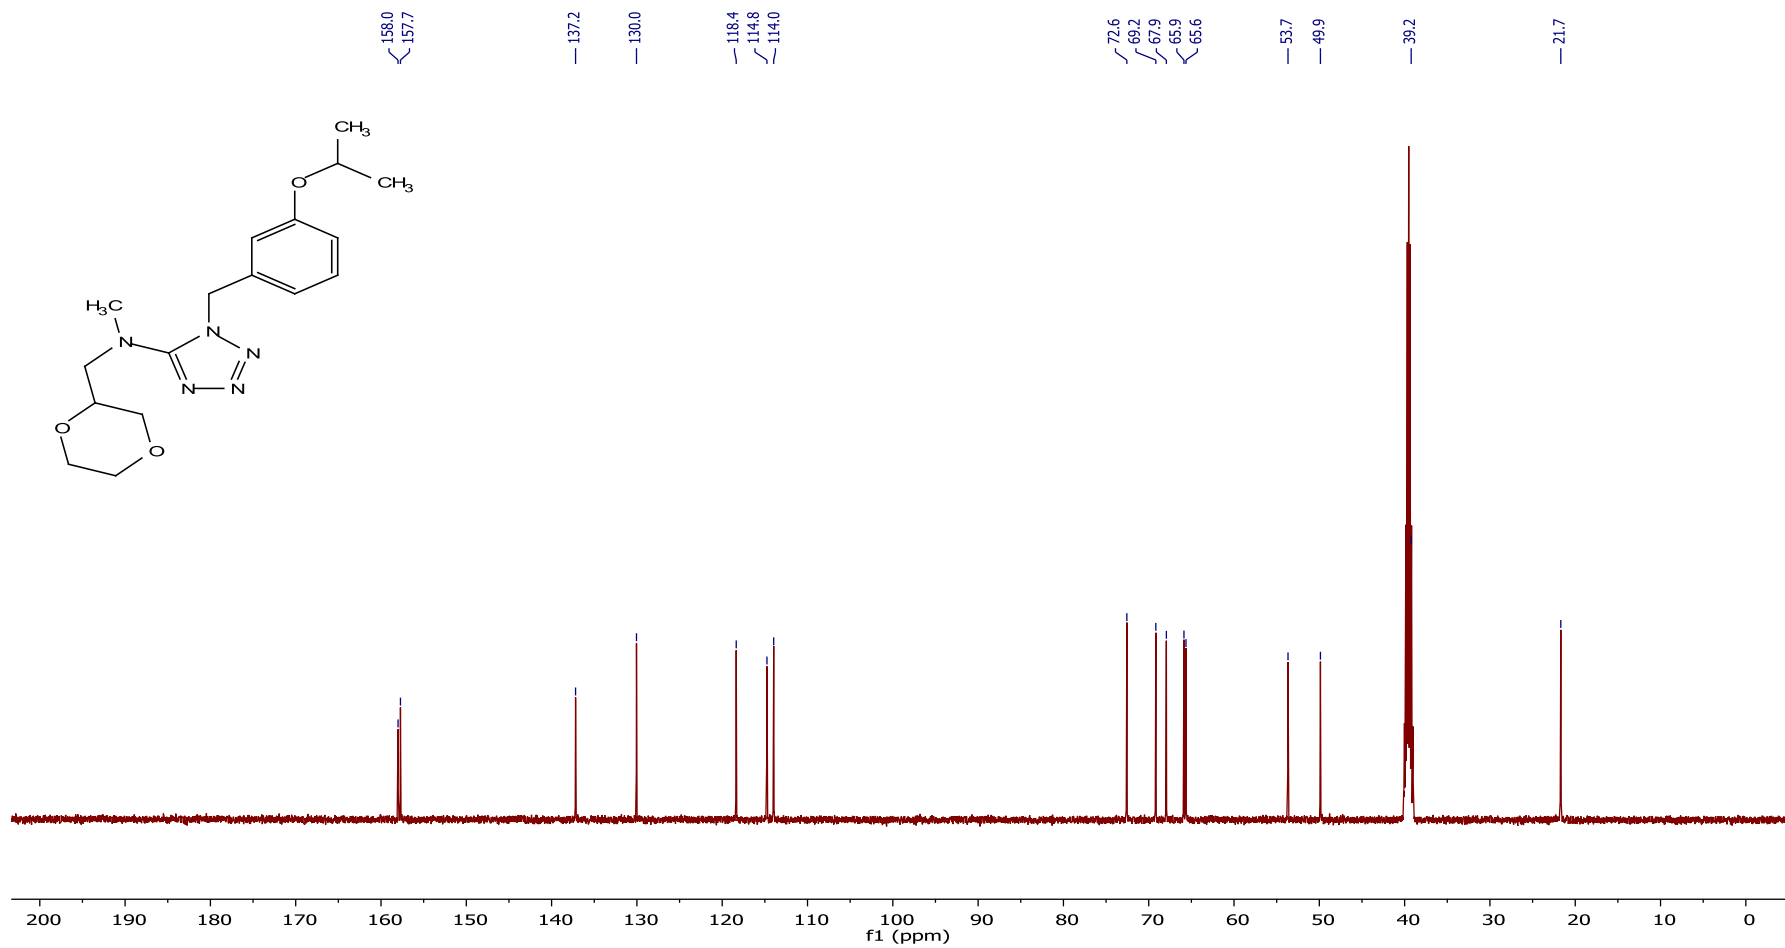

<sup>1</sup>H NMR spectrum of the compound **9**{90,371}.

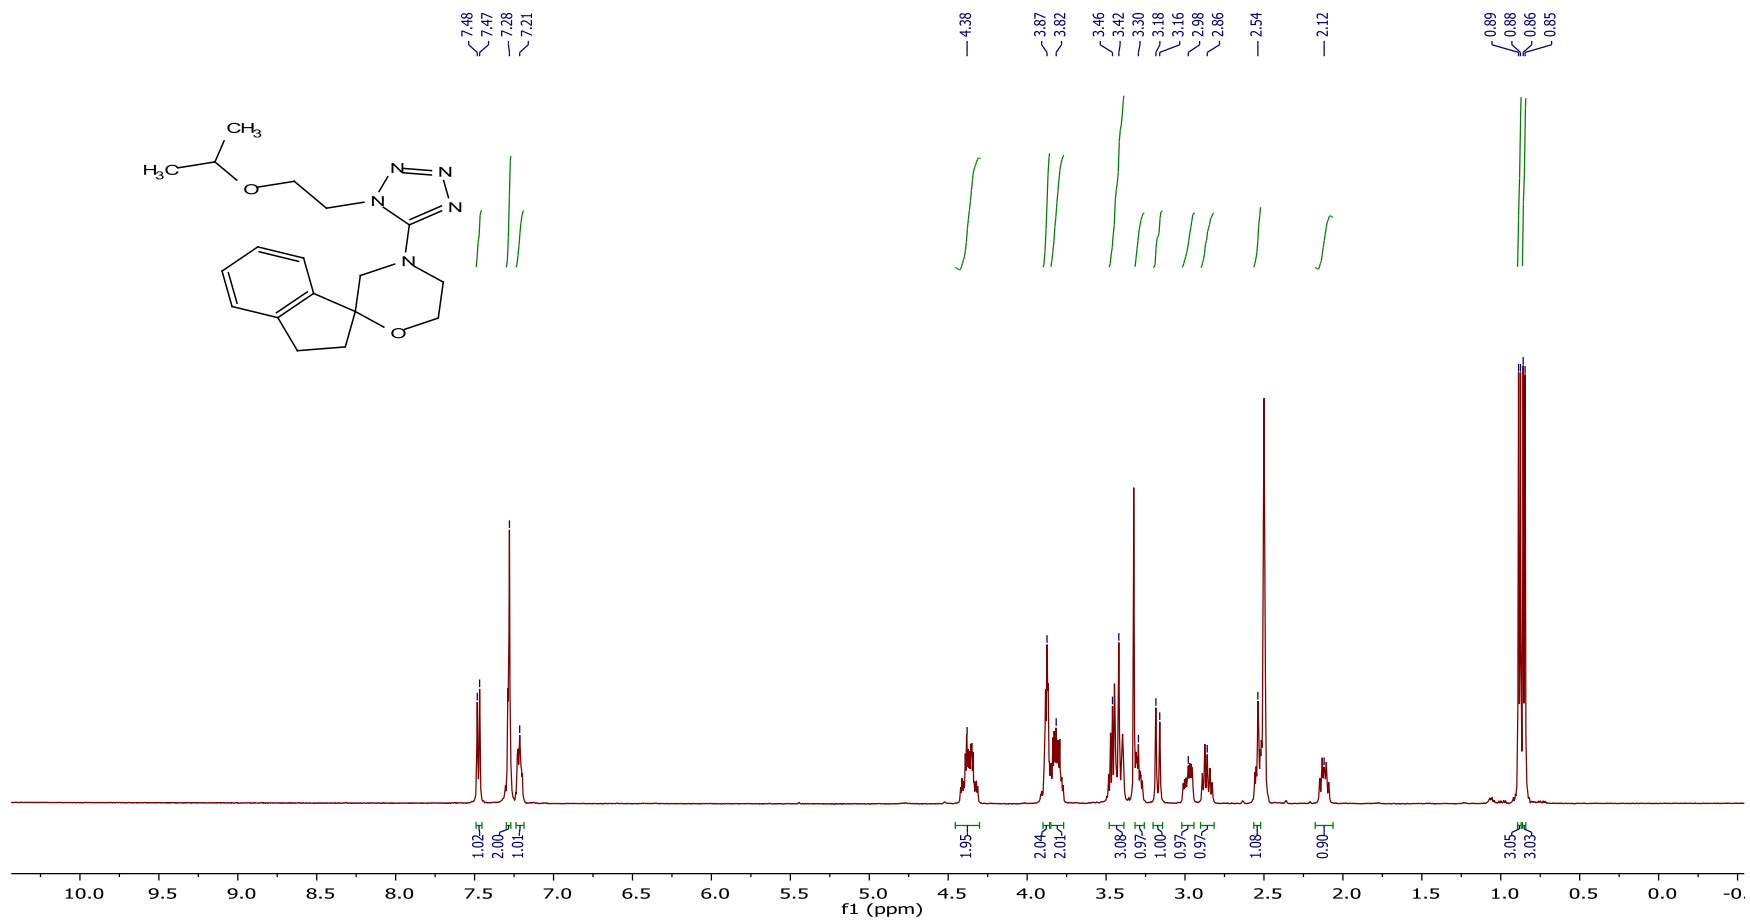

$^{13}\text{C}$  NMR spectrum of the compound **9**{90,371}.

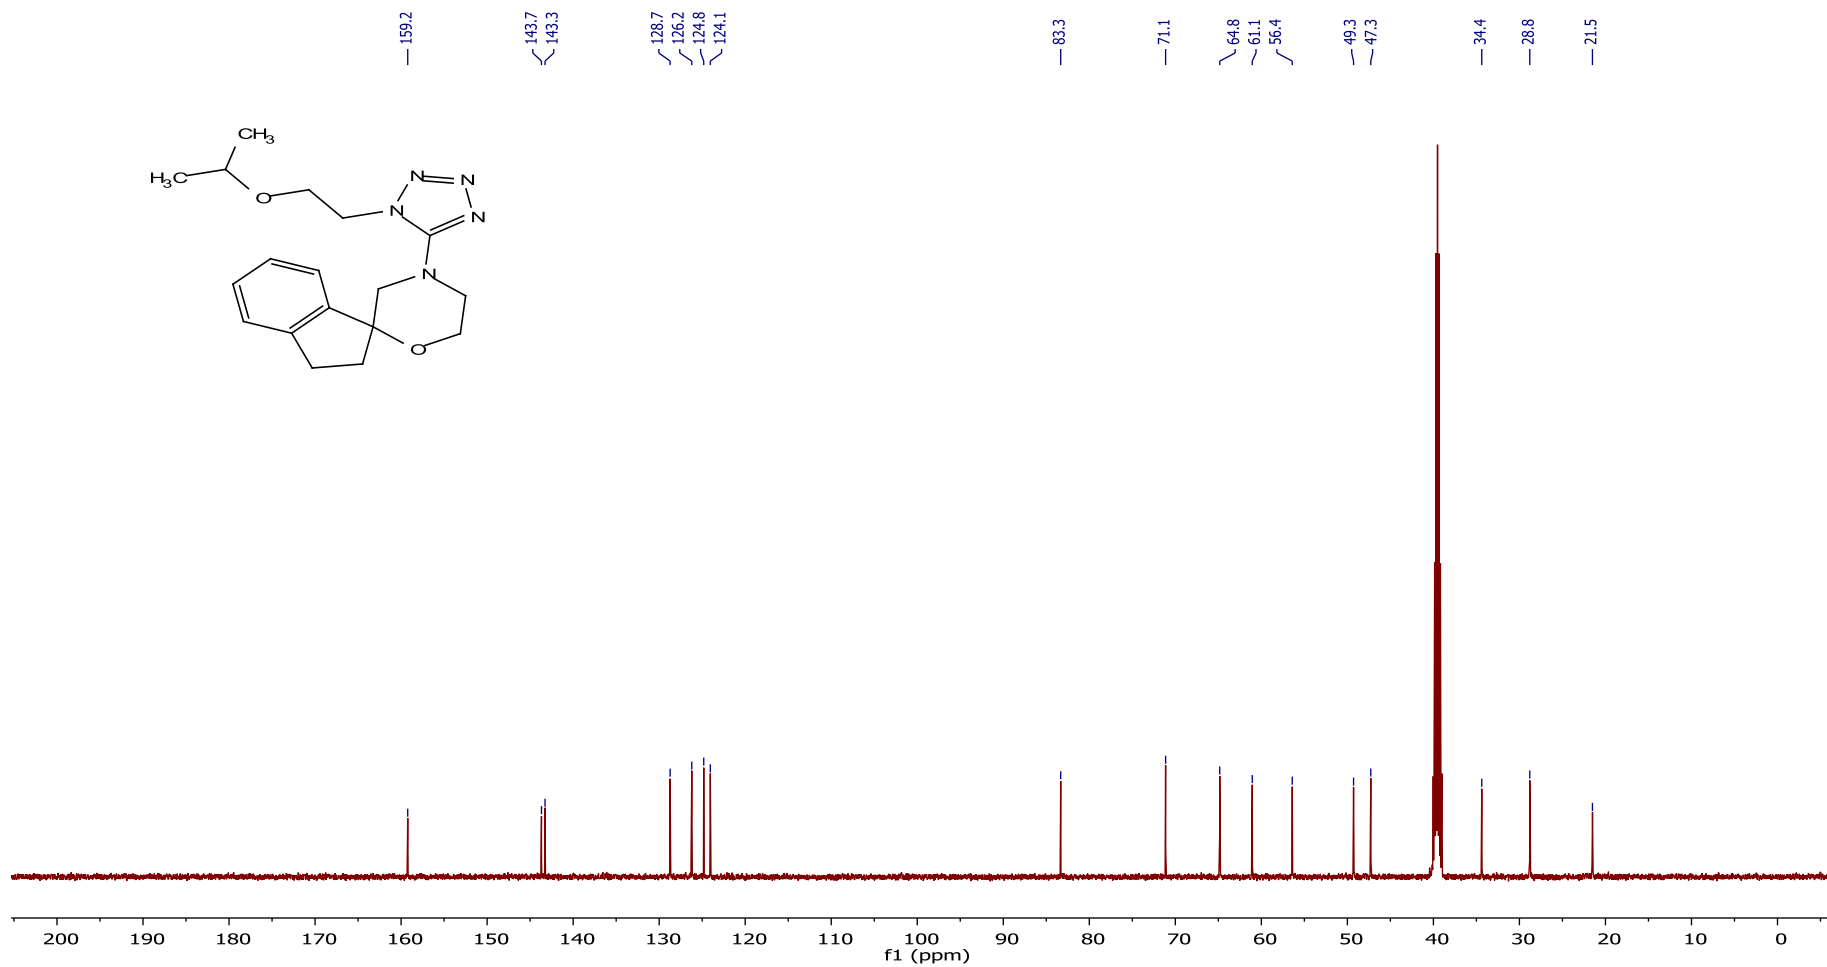

<sup>1</sup>H NMR spectrum of the compound **9**{102,356}.

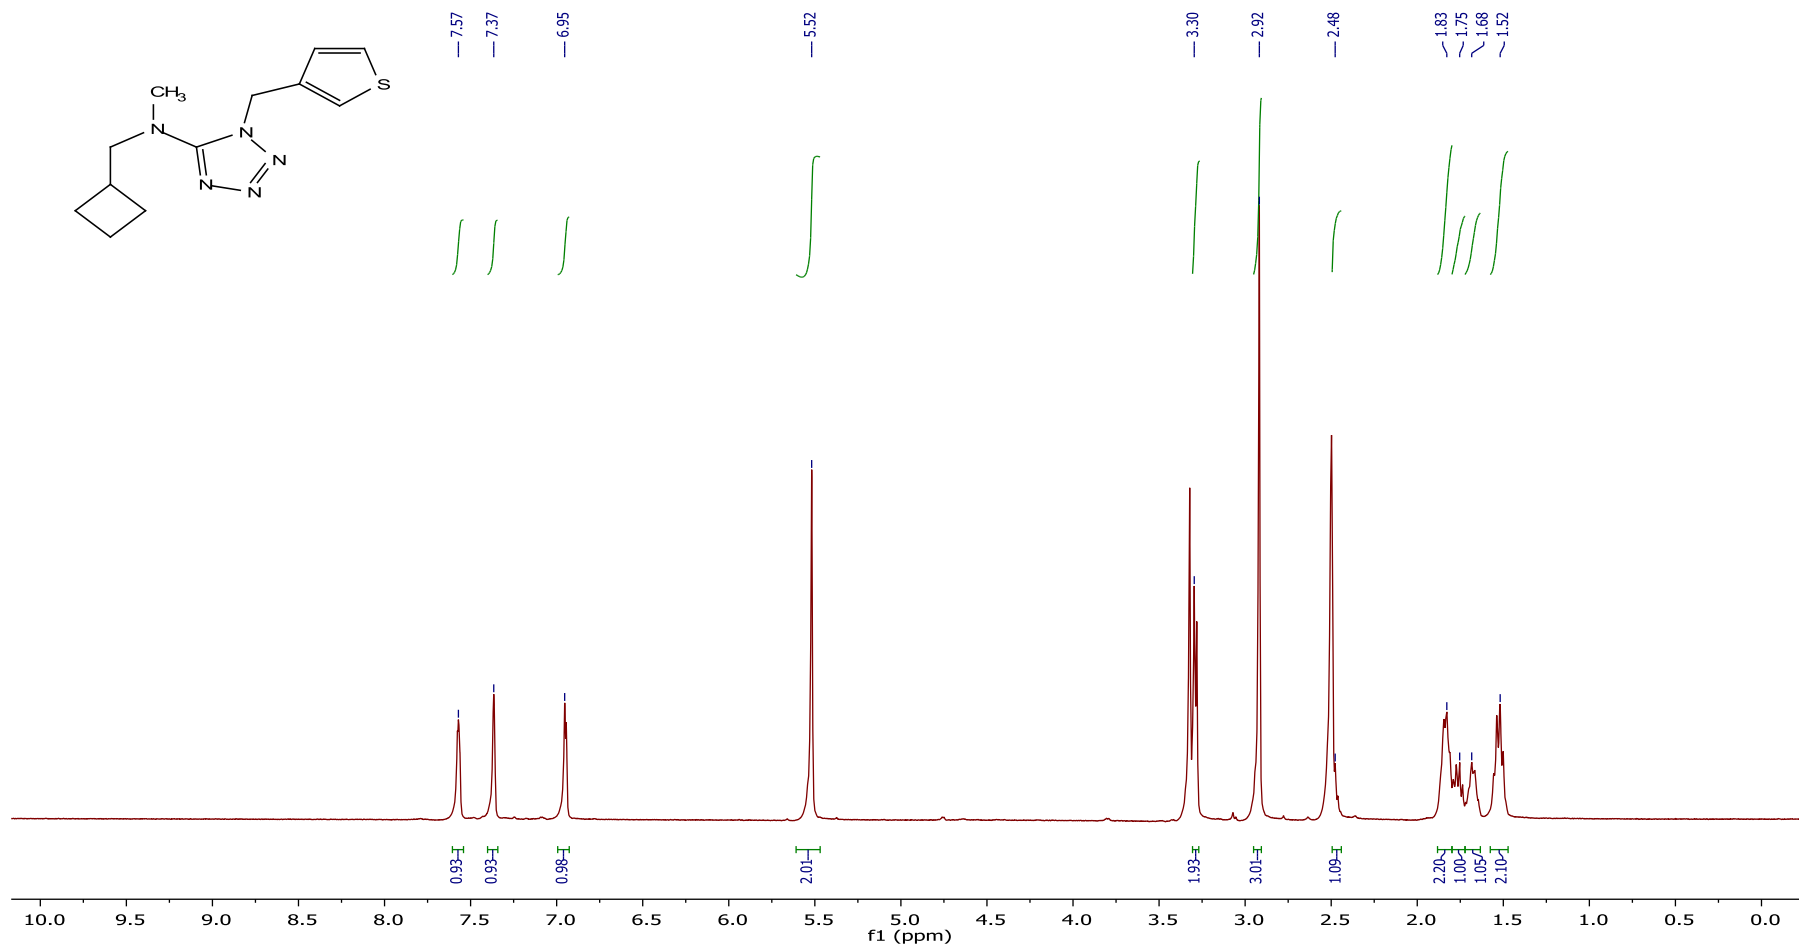

$^{13}\text{C}$  NMR spectrum of the compound **9**{102,356}.

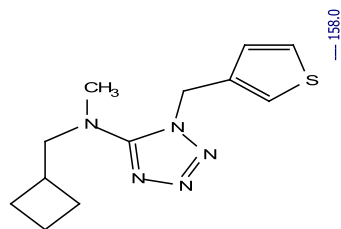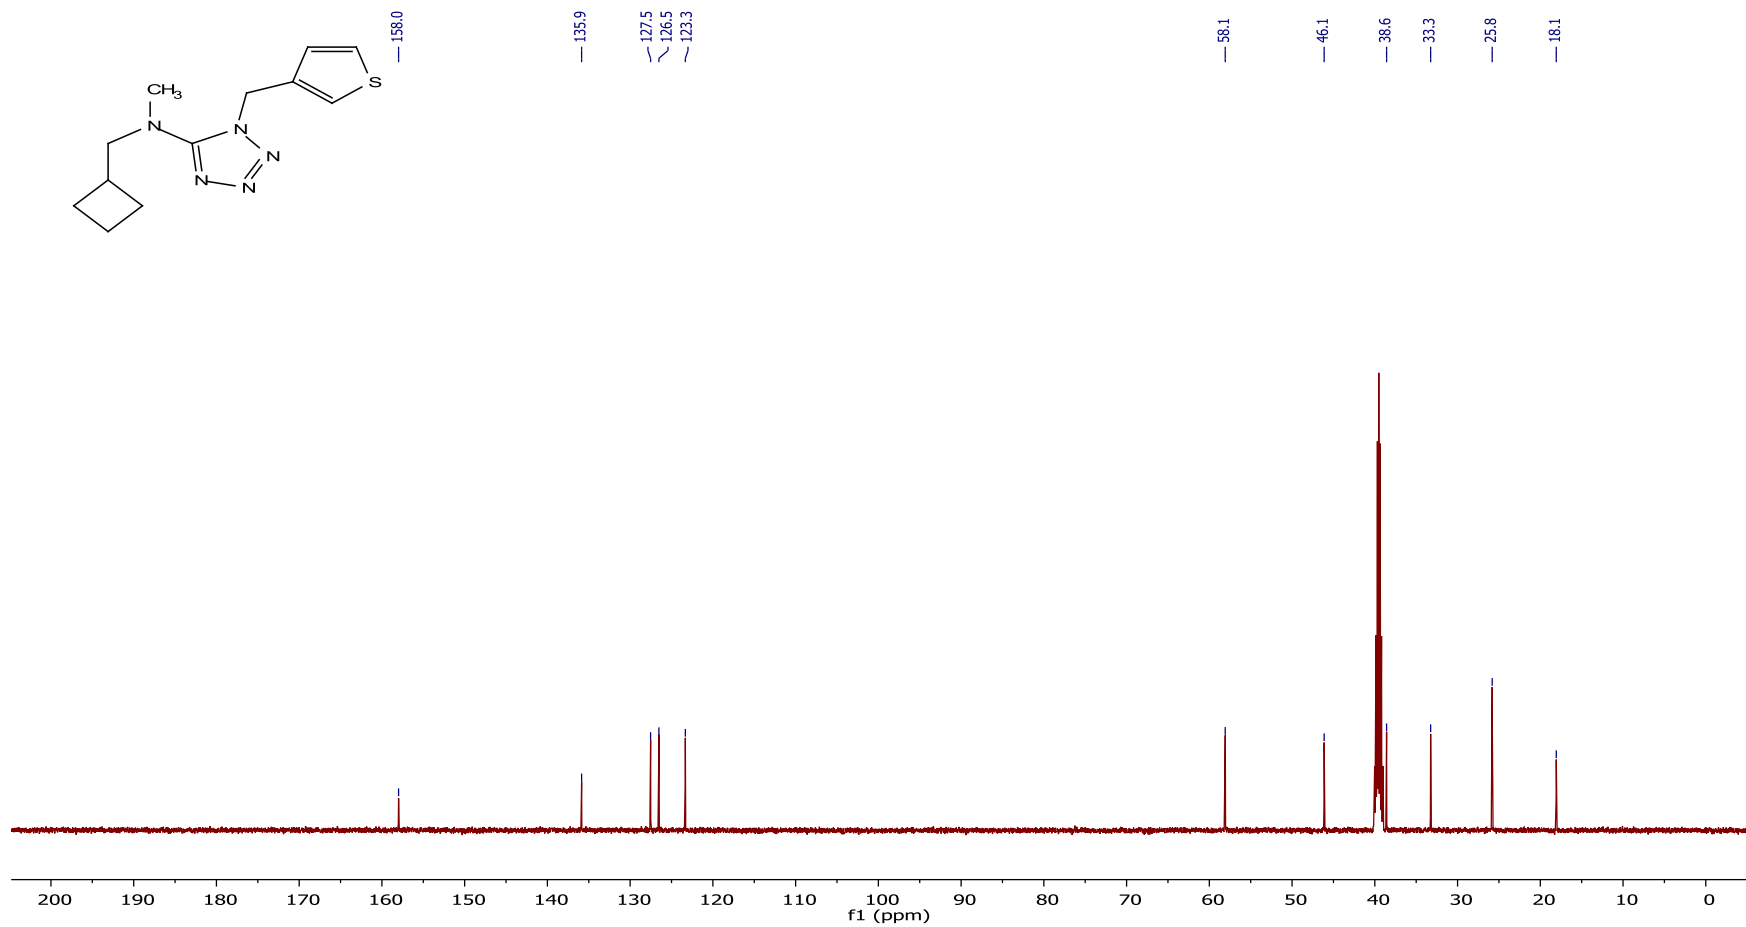

<sup>1</sup>H NMR spectrum of the compound **9**{103,386}.

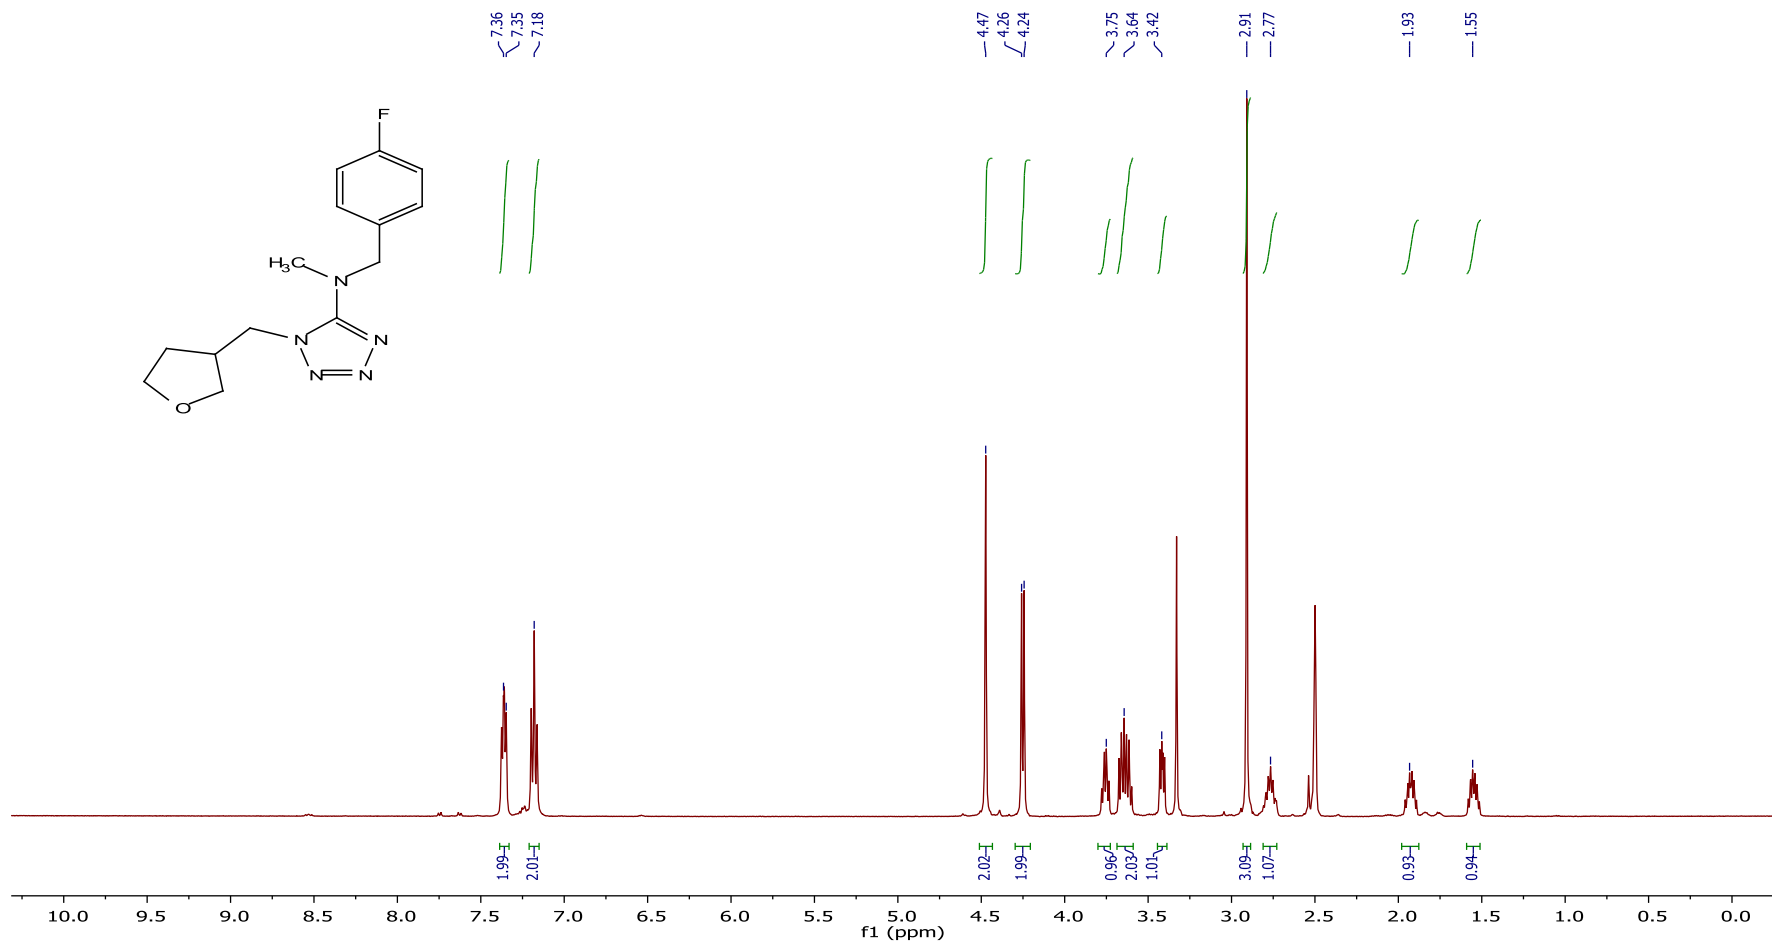

$^{13}\text{C}$  NMR spectrum of the compound **9**{103,386}.

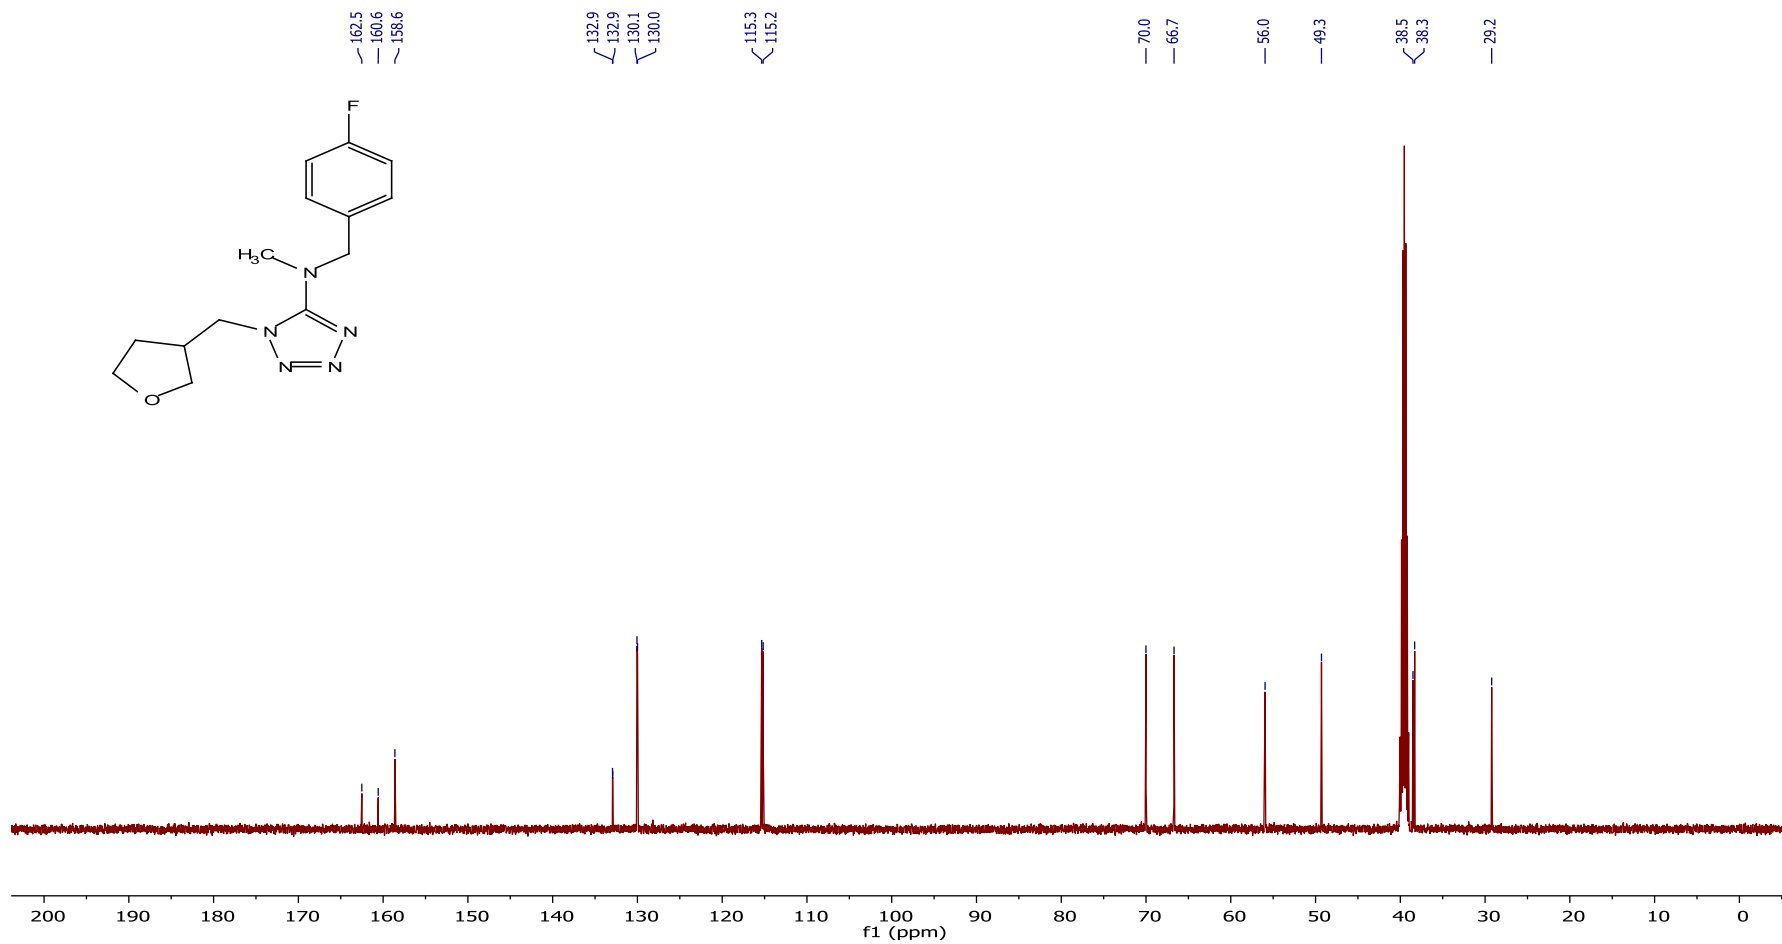

$^{19}\text{F}$  NMR spectrum of the compound **9**{103,386}.

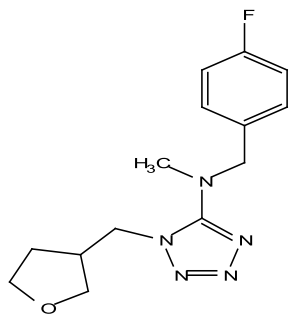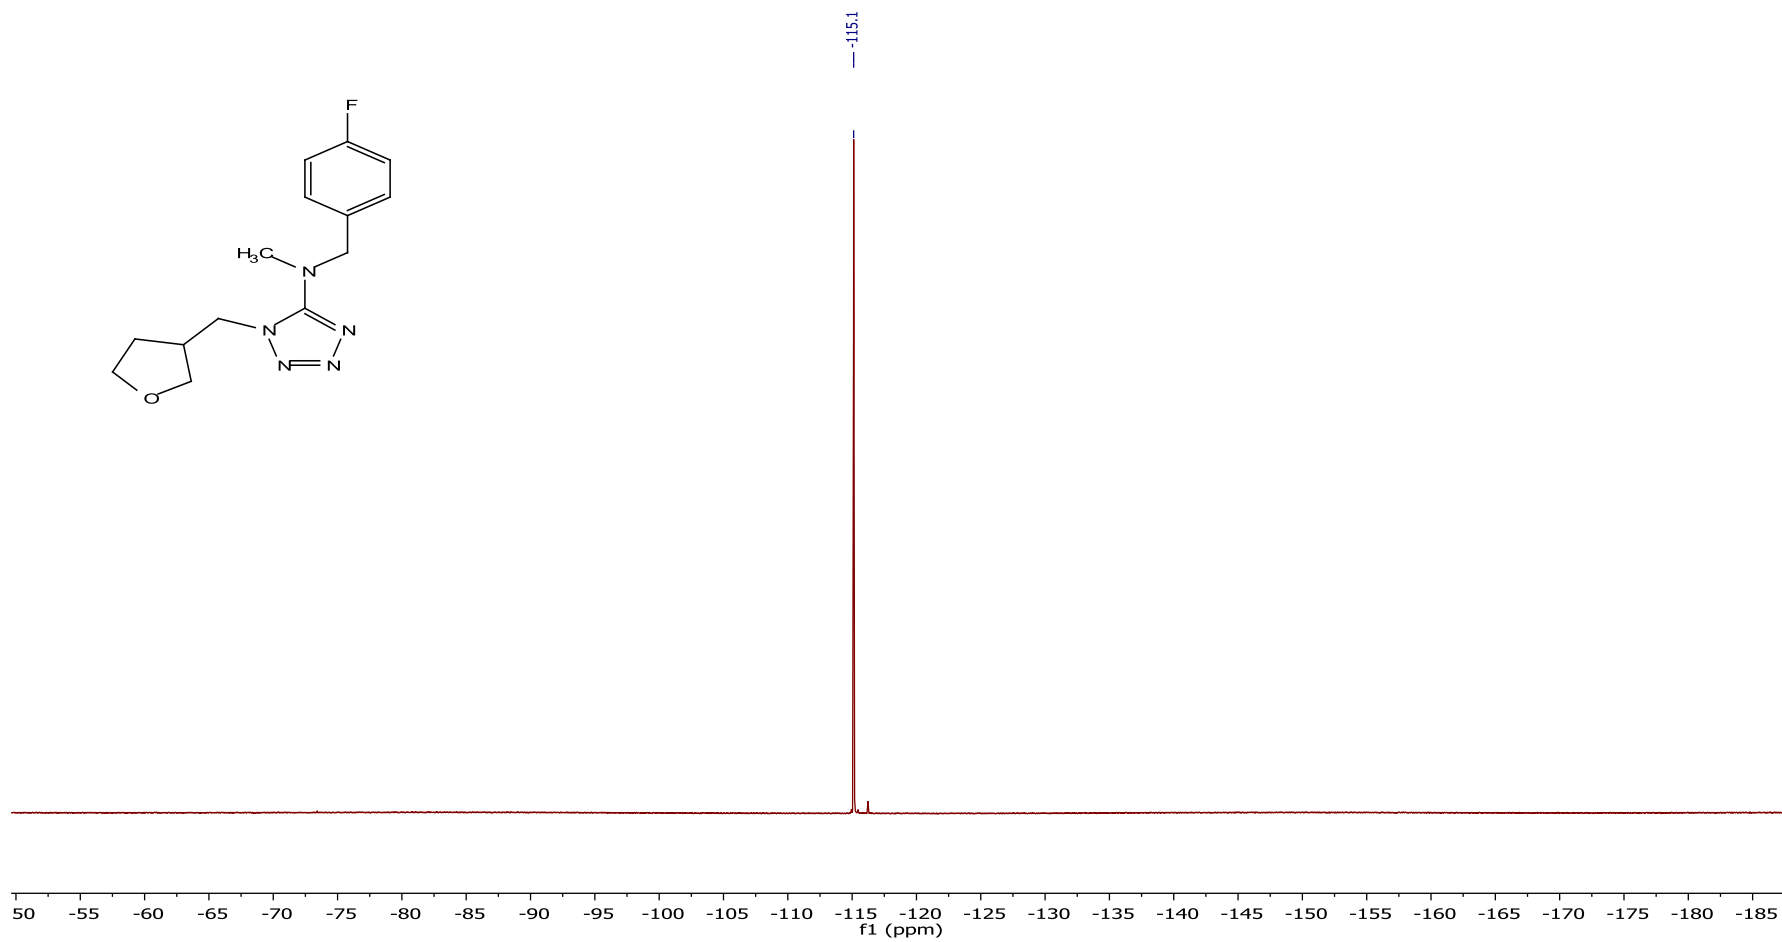



<sup>1</sup>H NMR spectrum of the compound **9**{110,333}.

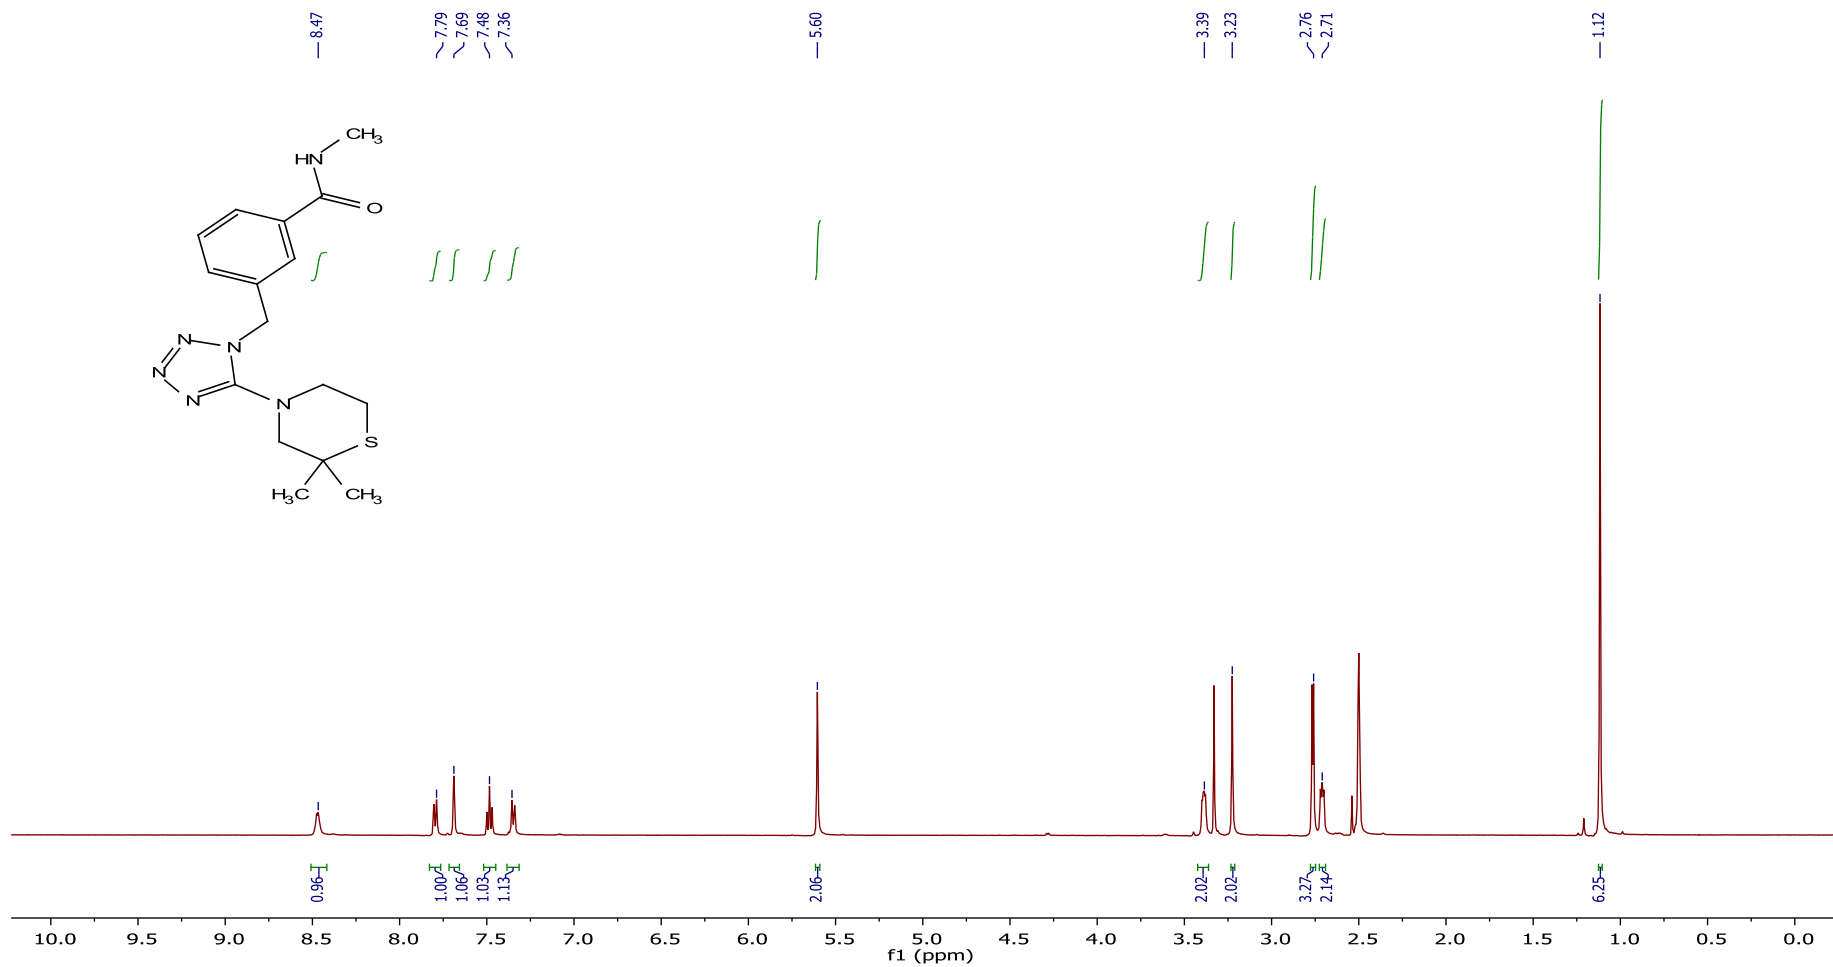

$^{13}\text{C}$  NMR spectrum of the compound **9**{110,333}.

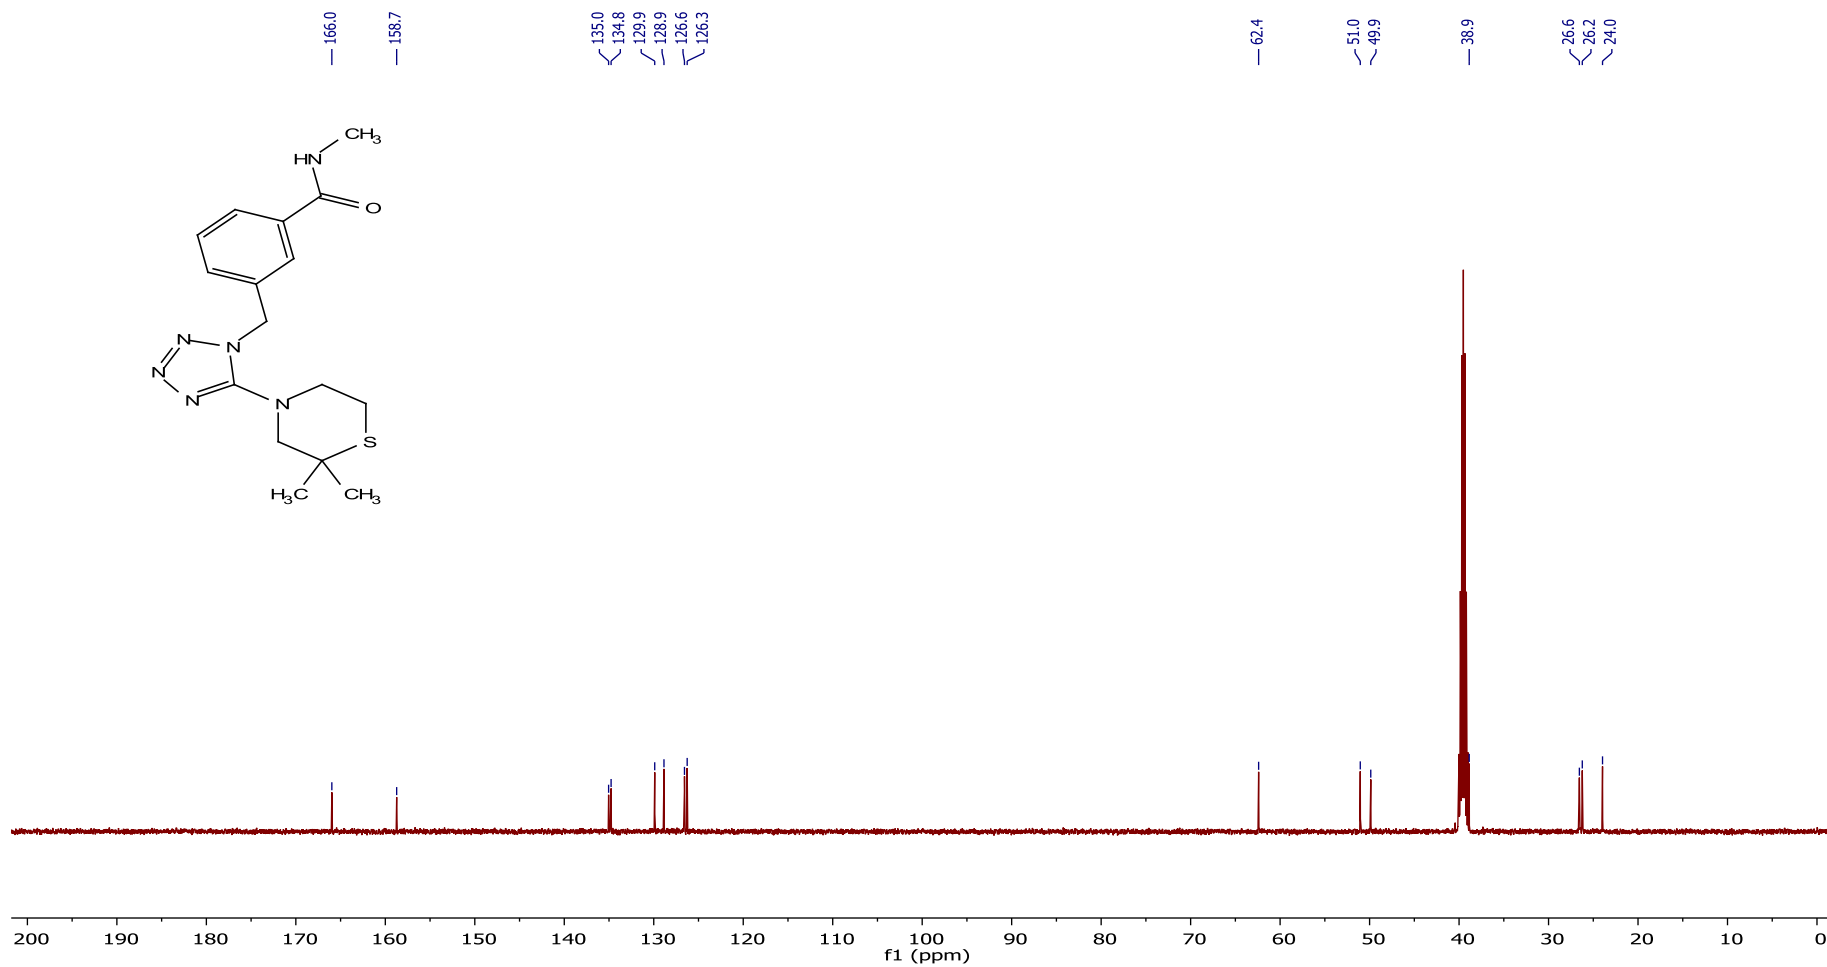

<sup>1</sup>H NMR spectrum of the compound **9**{121,302}.

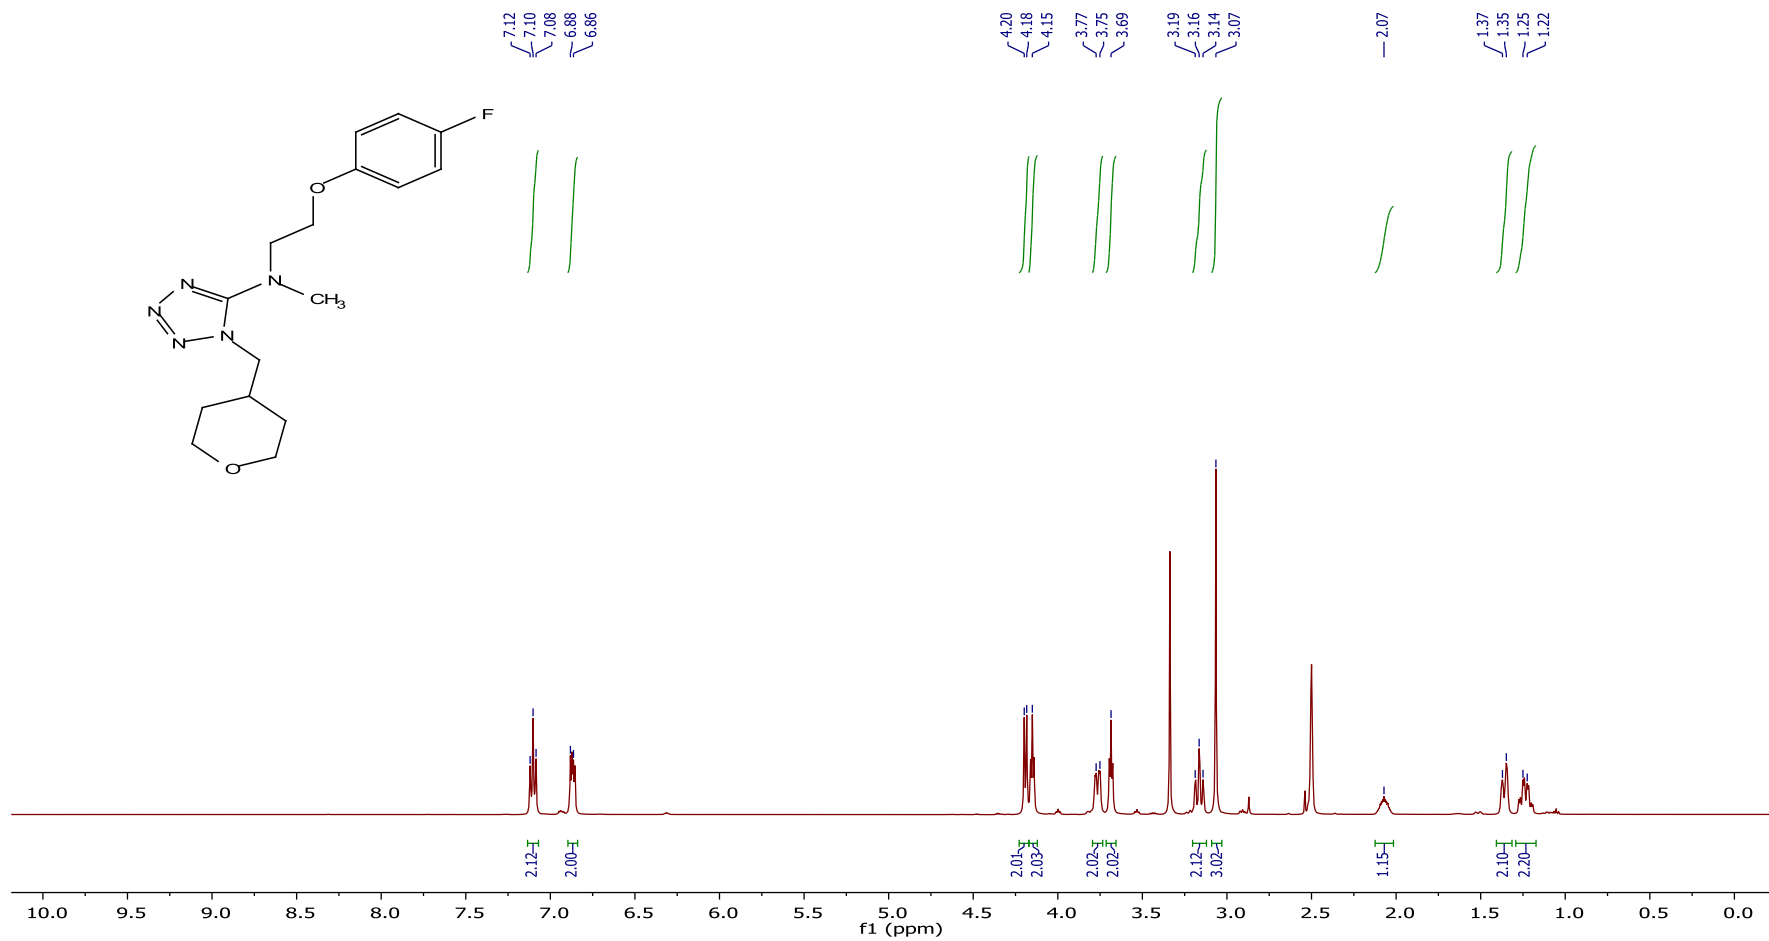

$^{13}\text{C}$  NMR spectrum of the compound **9**{121,302}.

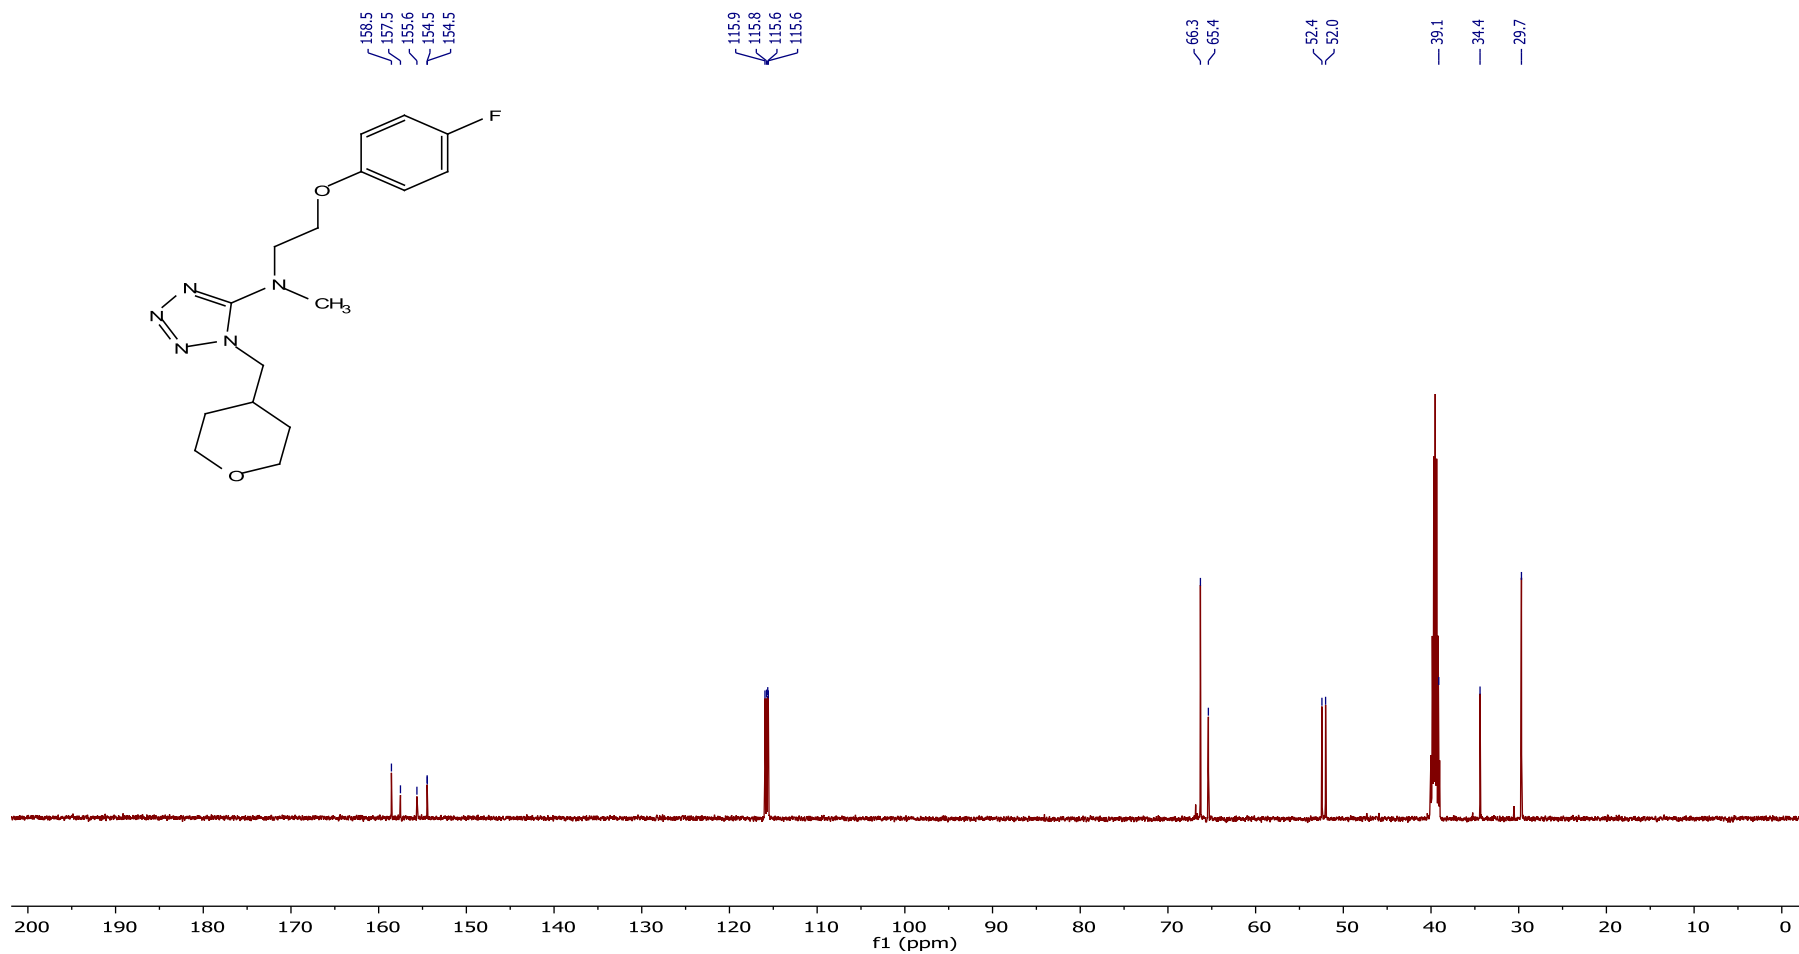

$^{19}\text{F}$  NMR spectrum of the compound **9**{121,302}.

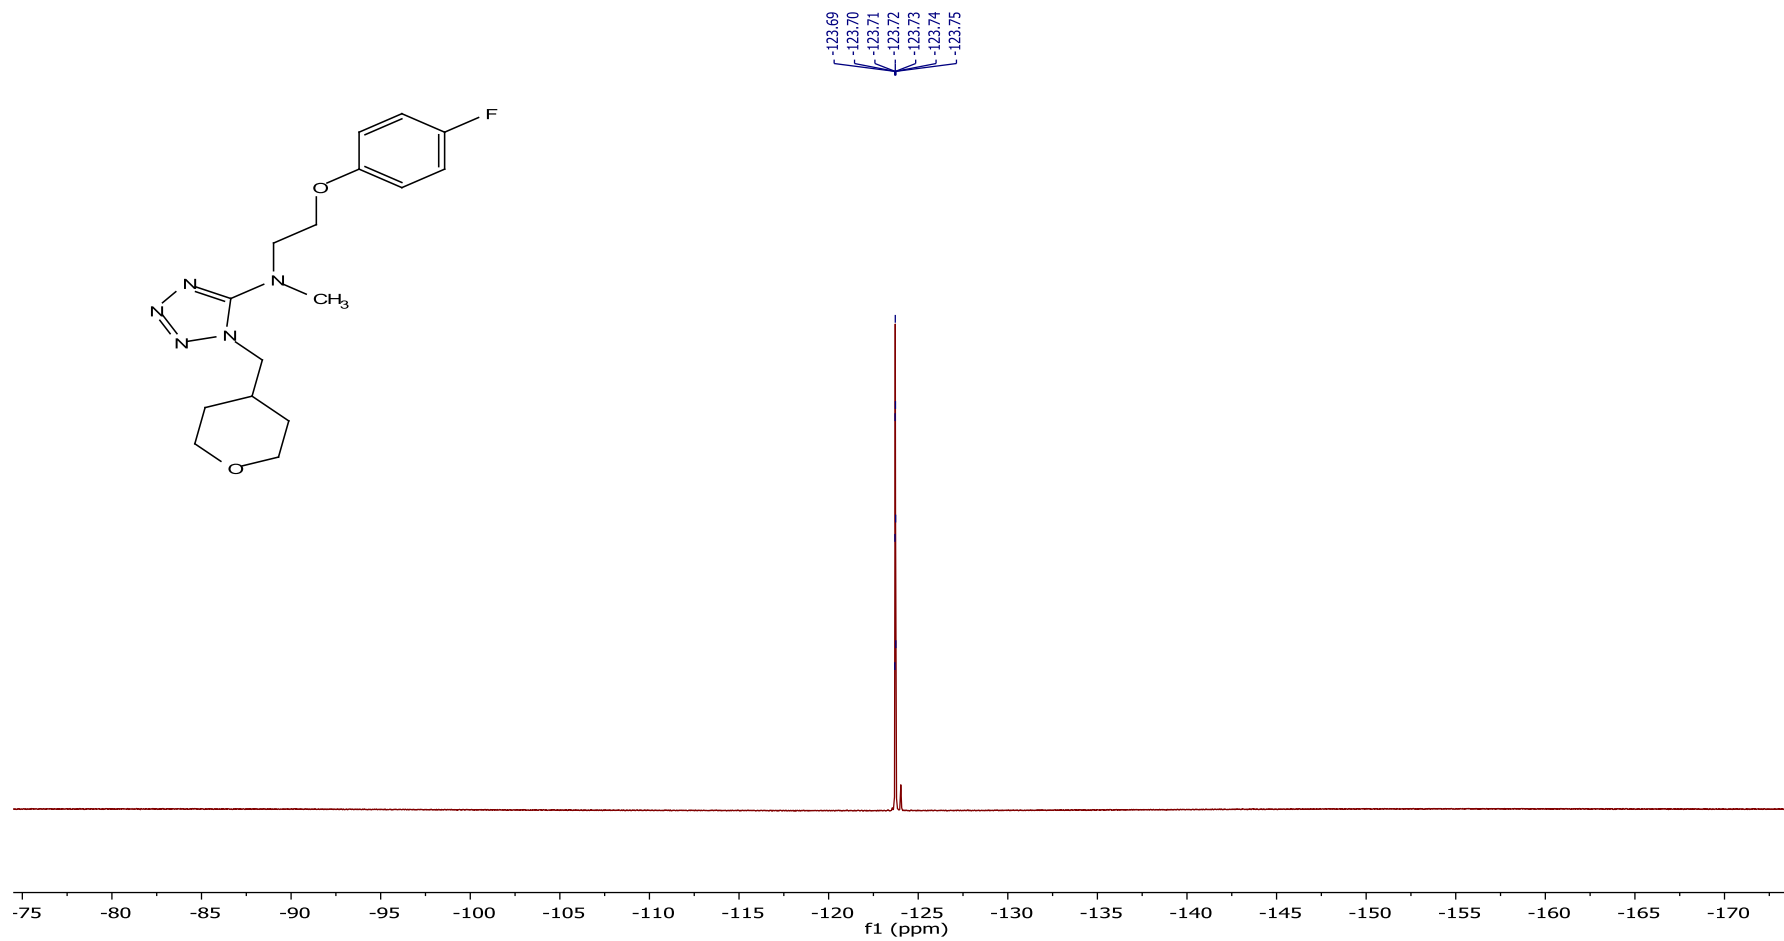

$^1\text{H}$  NMR spectrum of the compound **9**{(146,322)}.

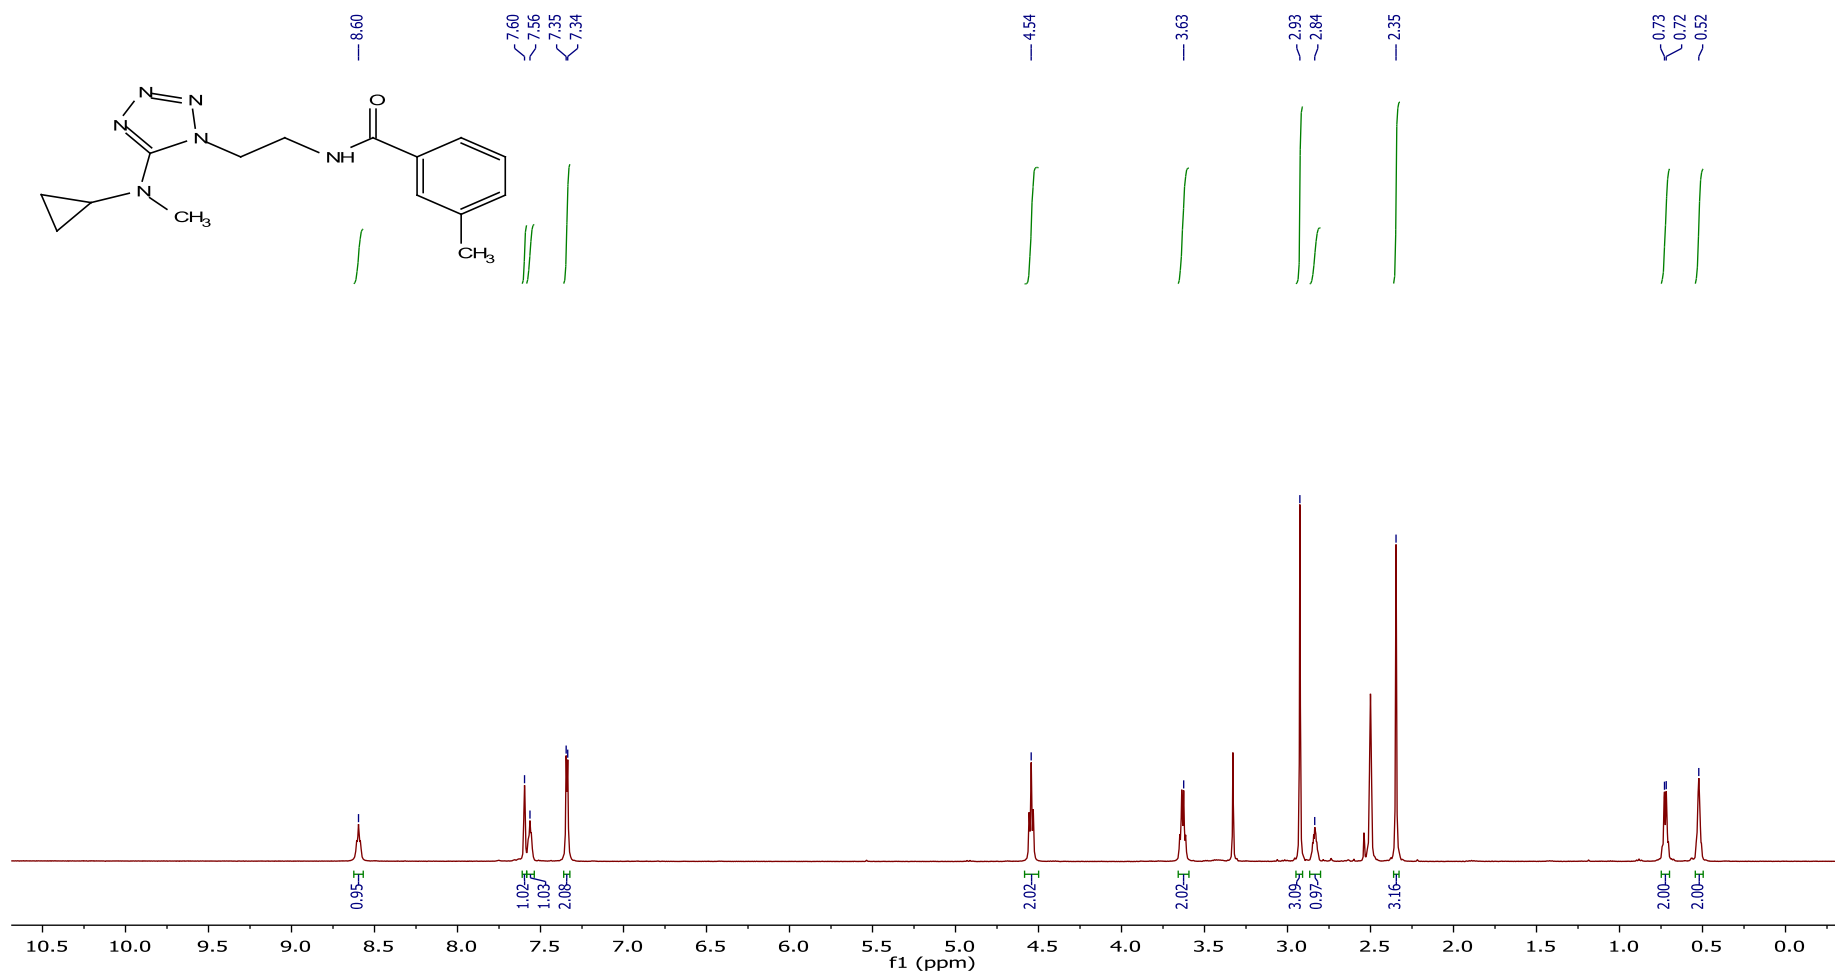

$^{13}\text{C}$  NMR spectrum of the compound **9** (146,322).

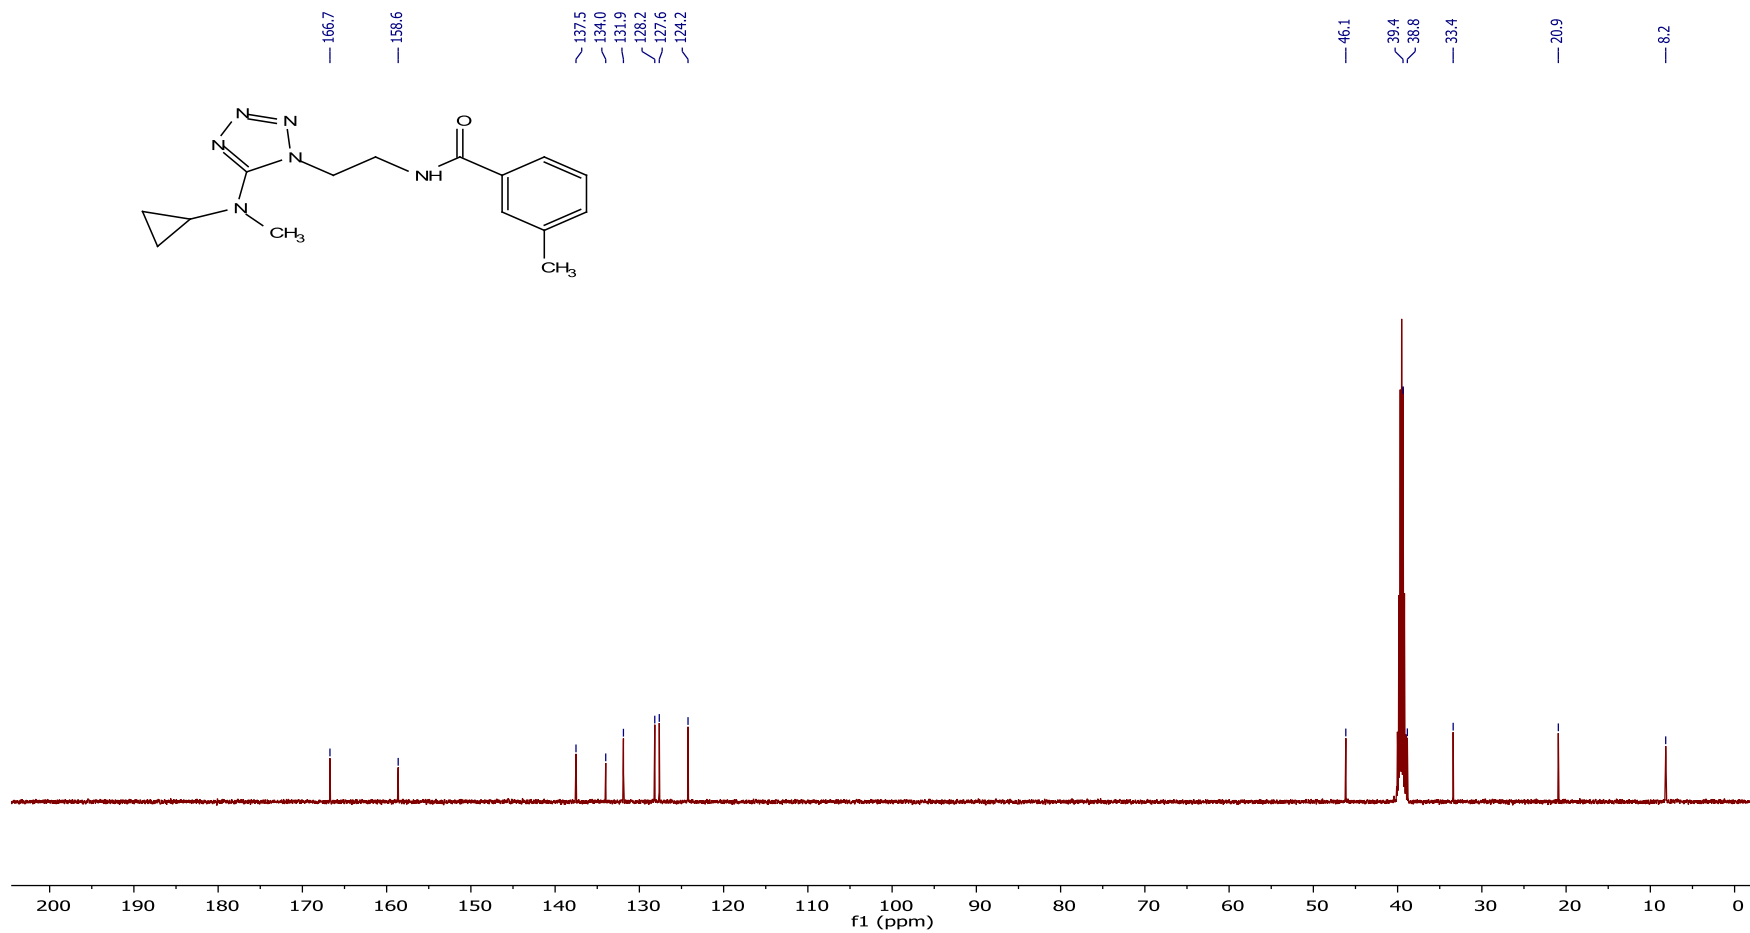

<sup>1</sup>H NMR spectrum of the compound **9**{175,299}.

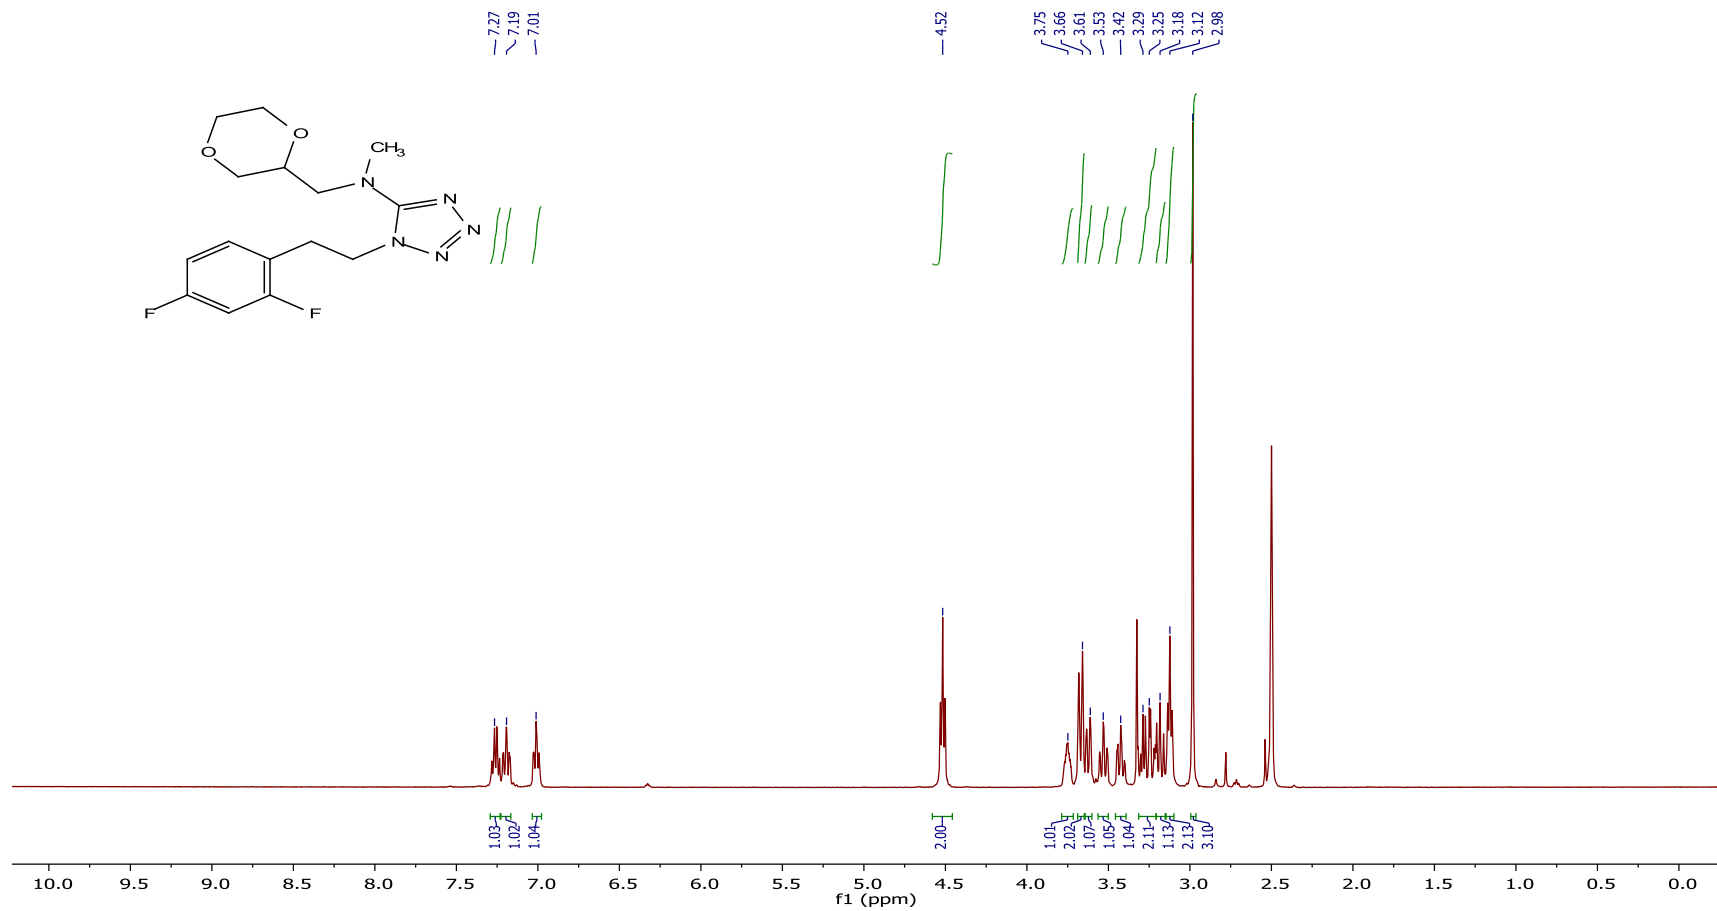



$^{13}\text{C}$  NMR spectrum of the compound **9**{175,299}.

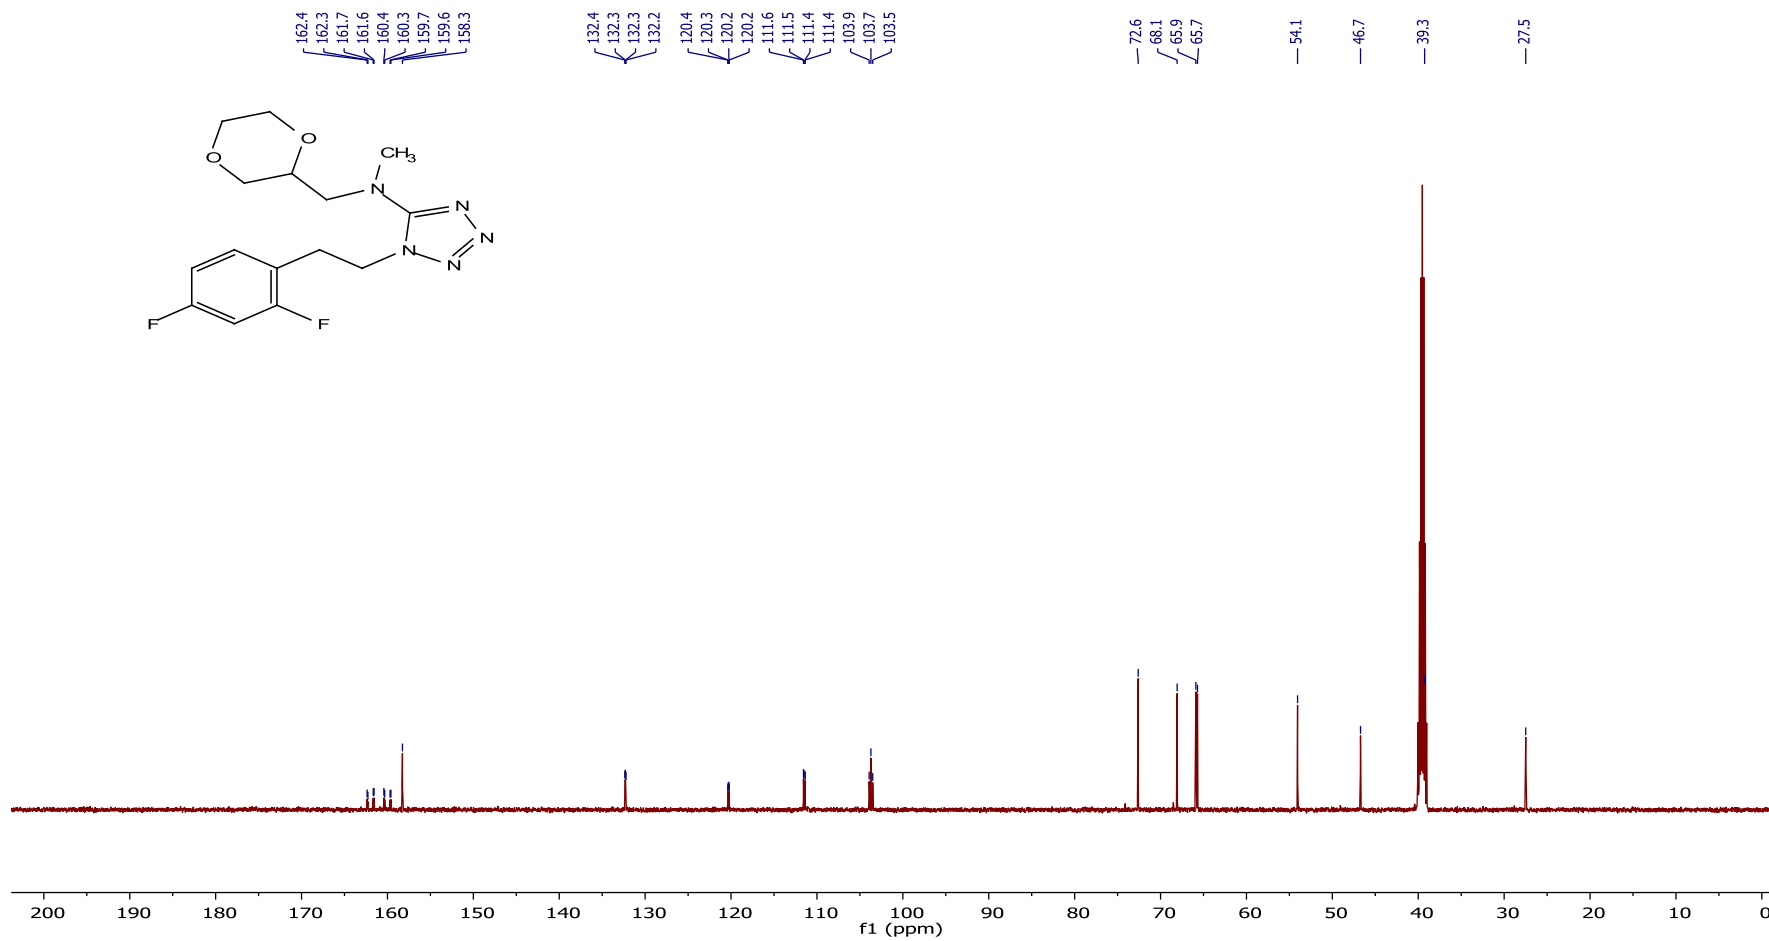

$^{19}\text{F}$  NMR spectrum of the compound **9**{175,299}.

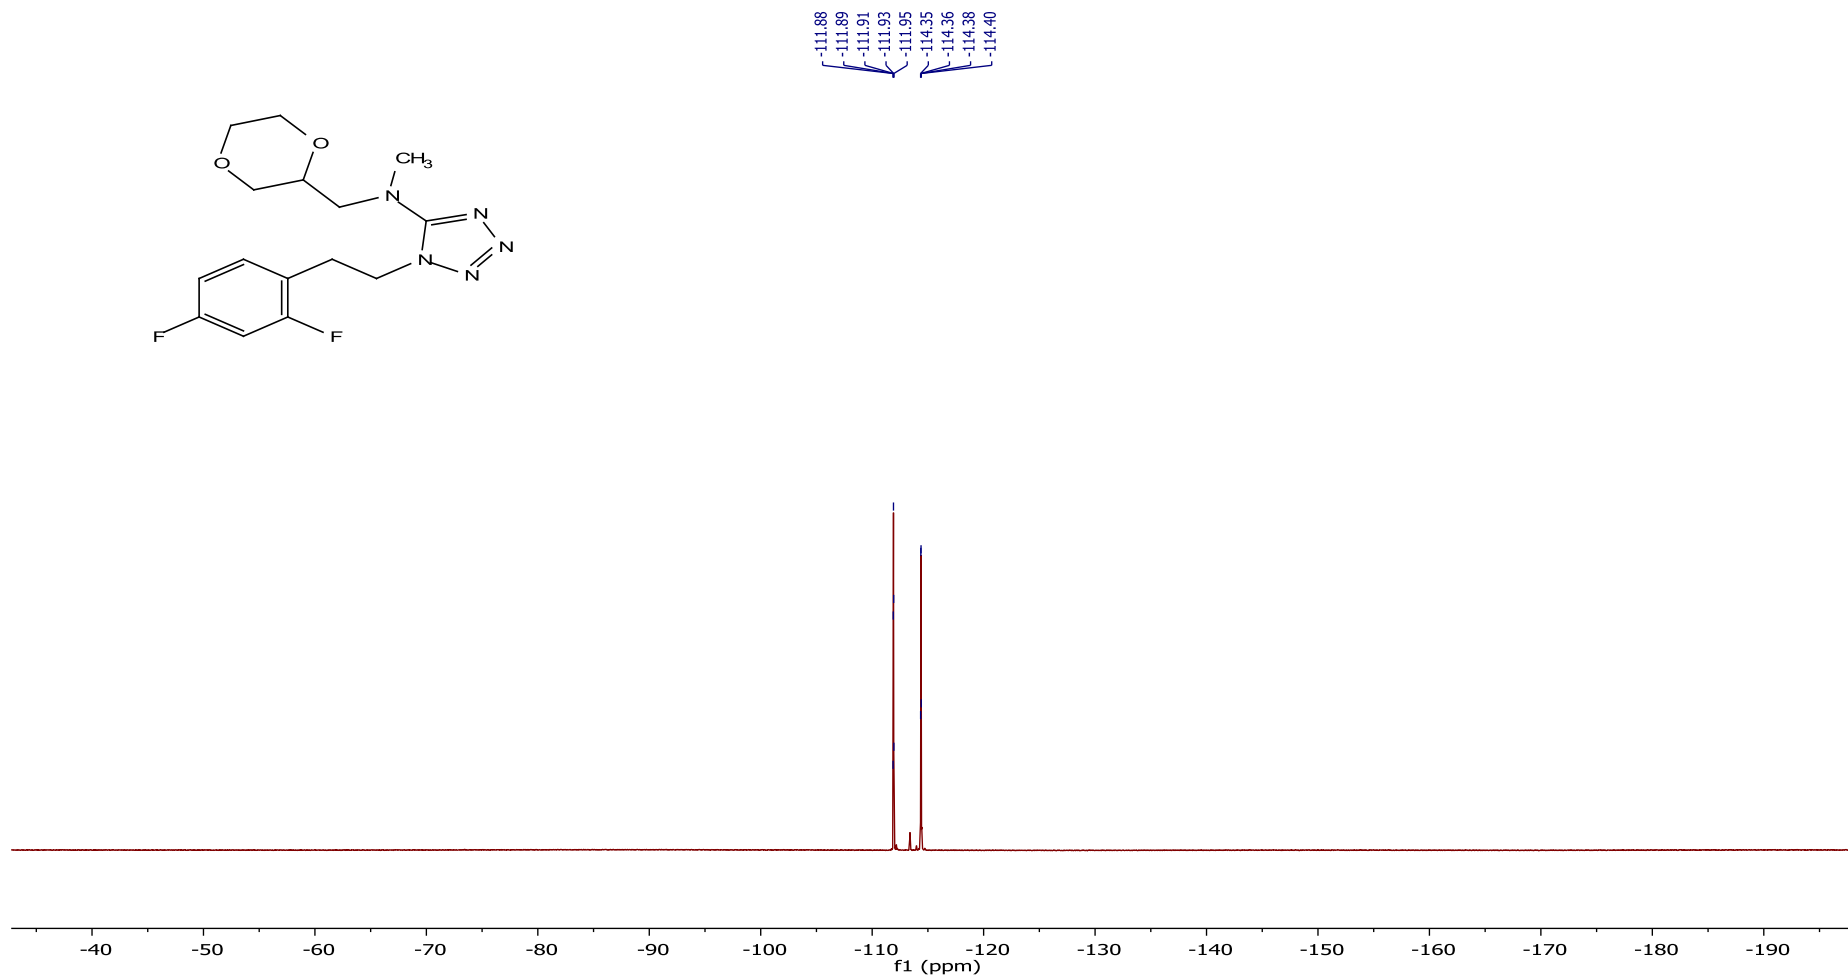

$^1\text{H}$  NMR spectrum of the compound **9**{151,319}.

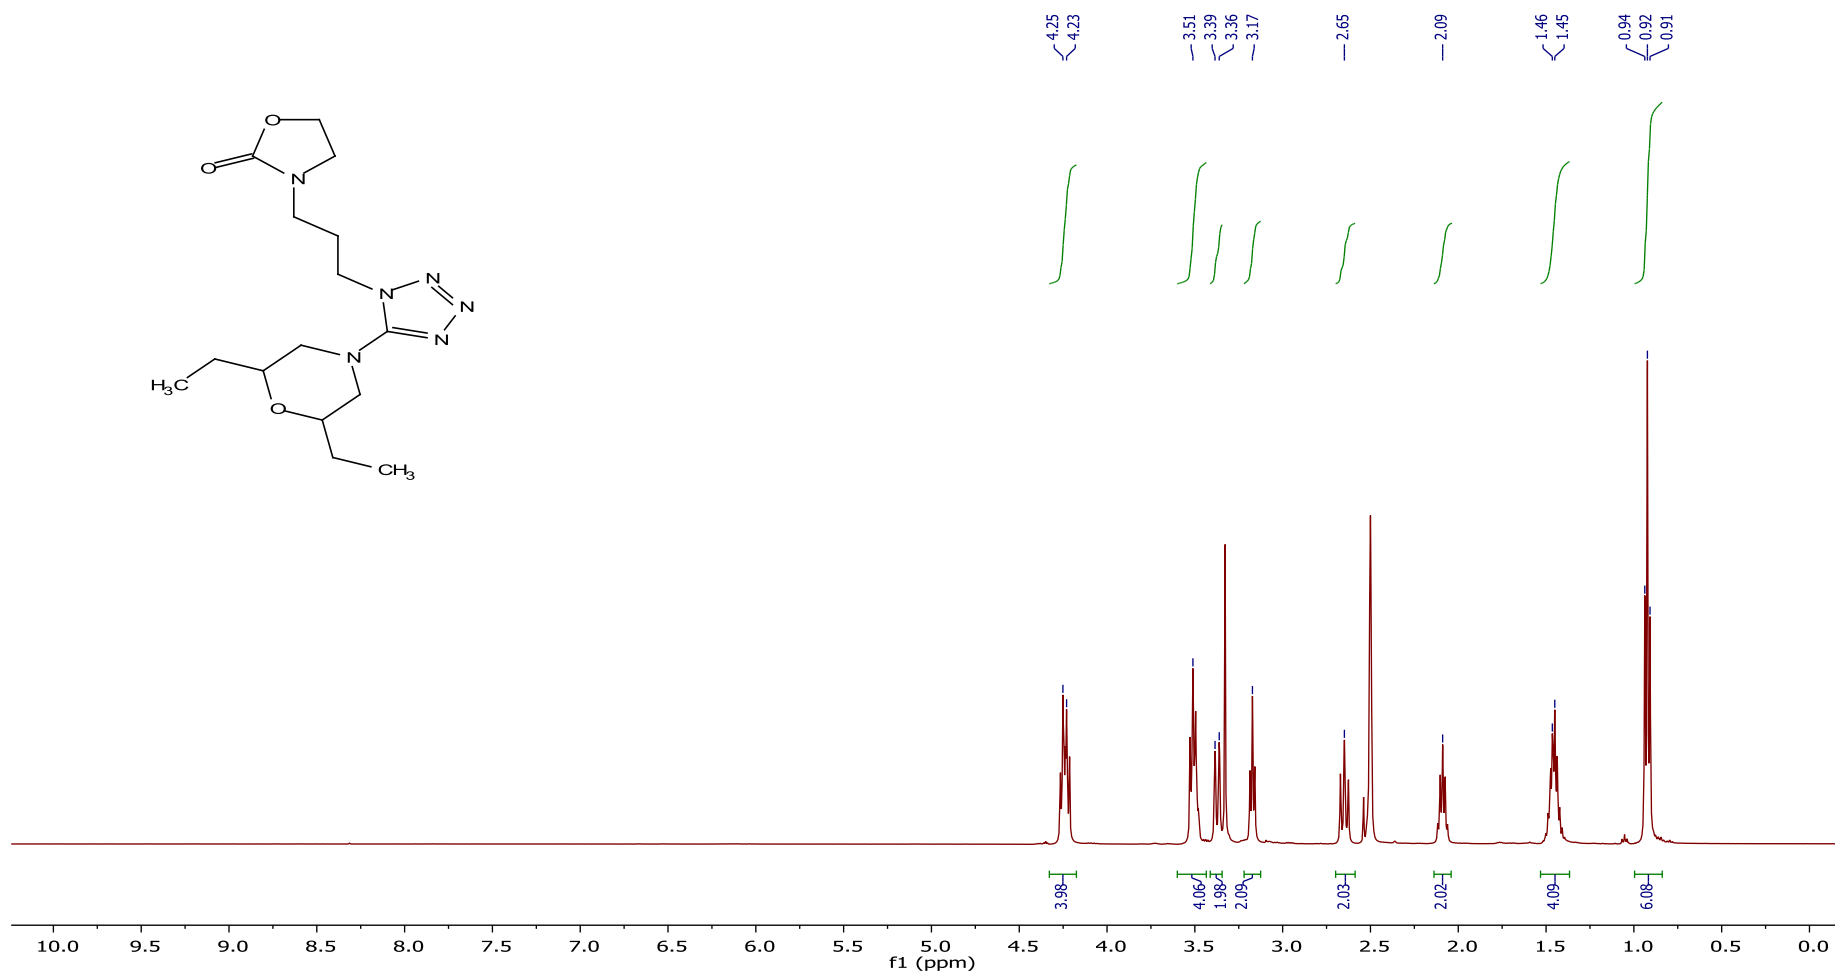

$^{13}\text{C}$  NMR spectrum of the compound **9**{151,319}.

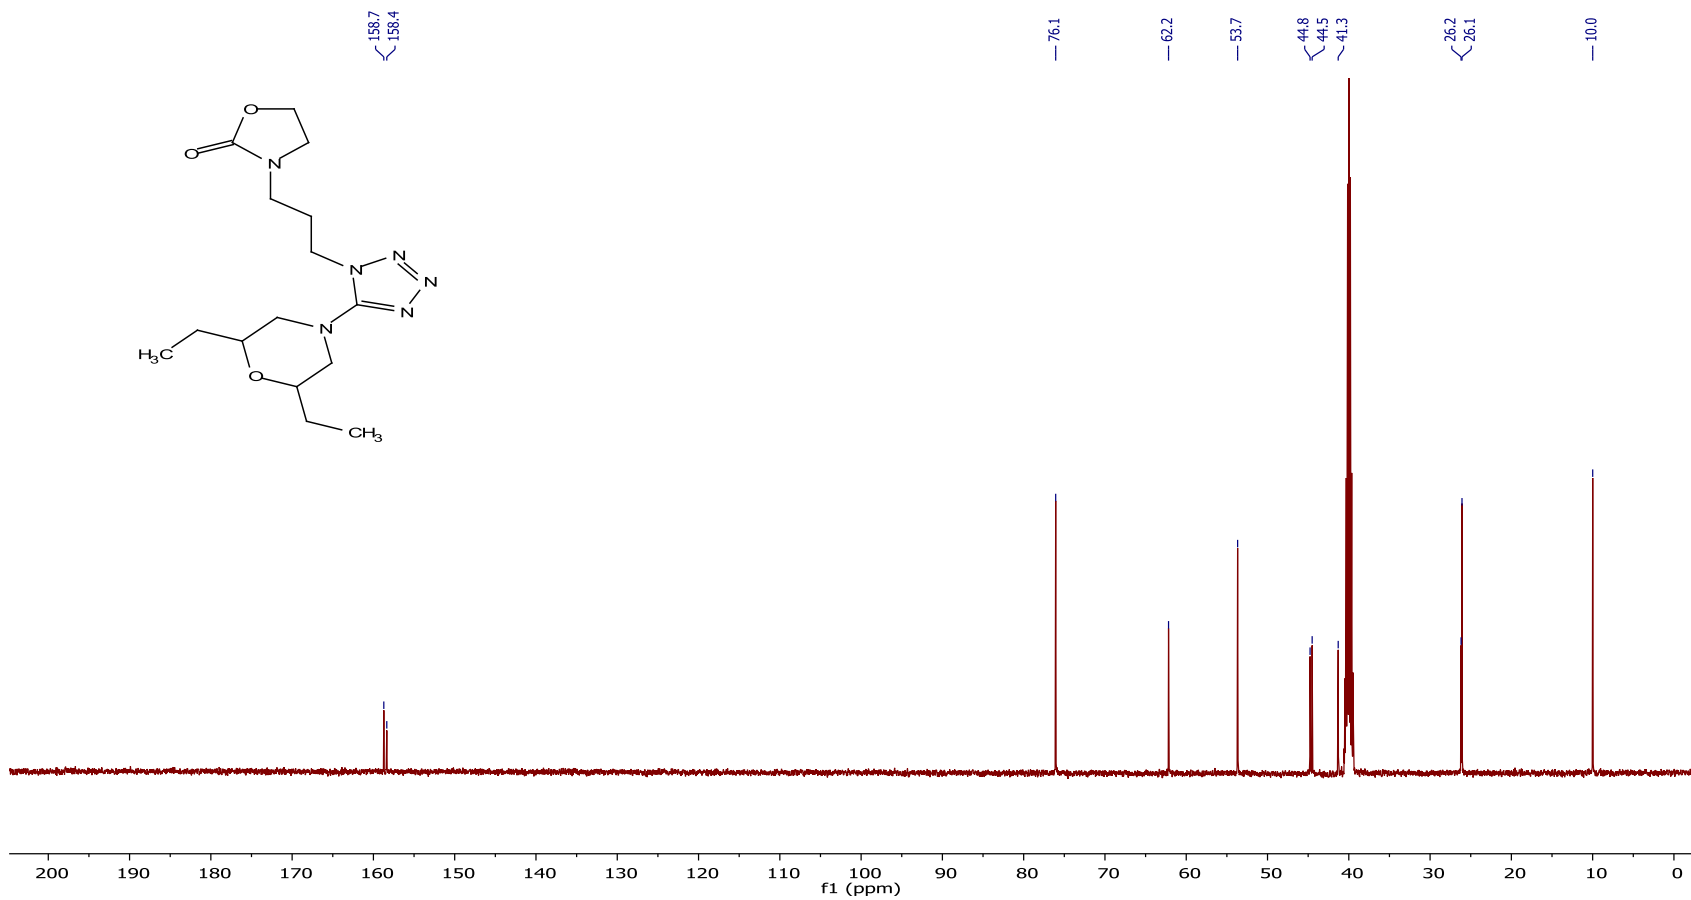

<sup>1</sup>H NMR spectrum of the compound **9**{165,299}.

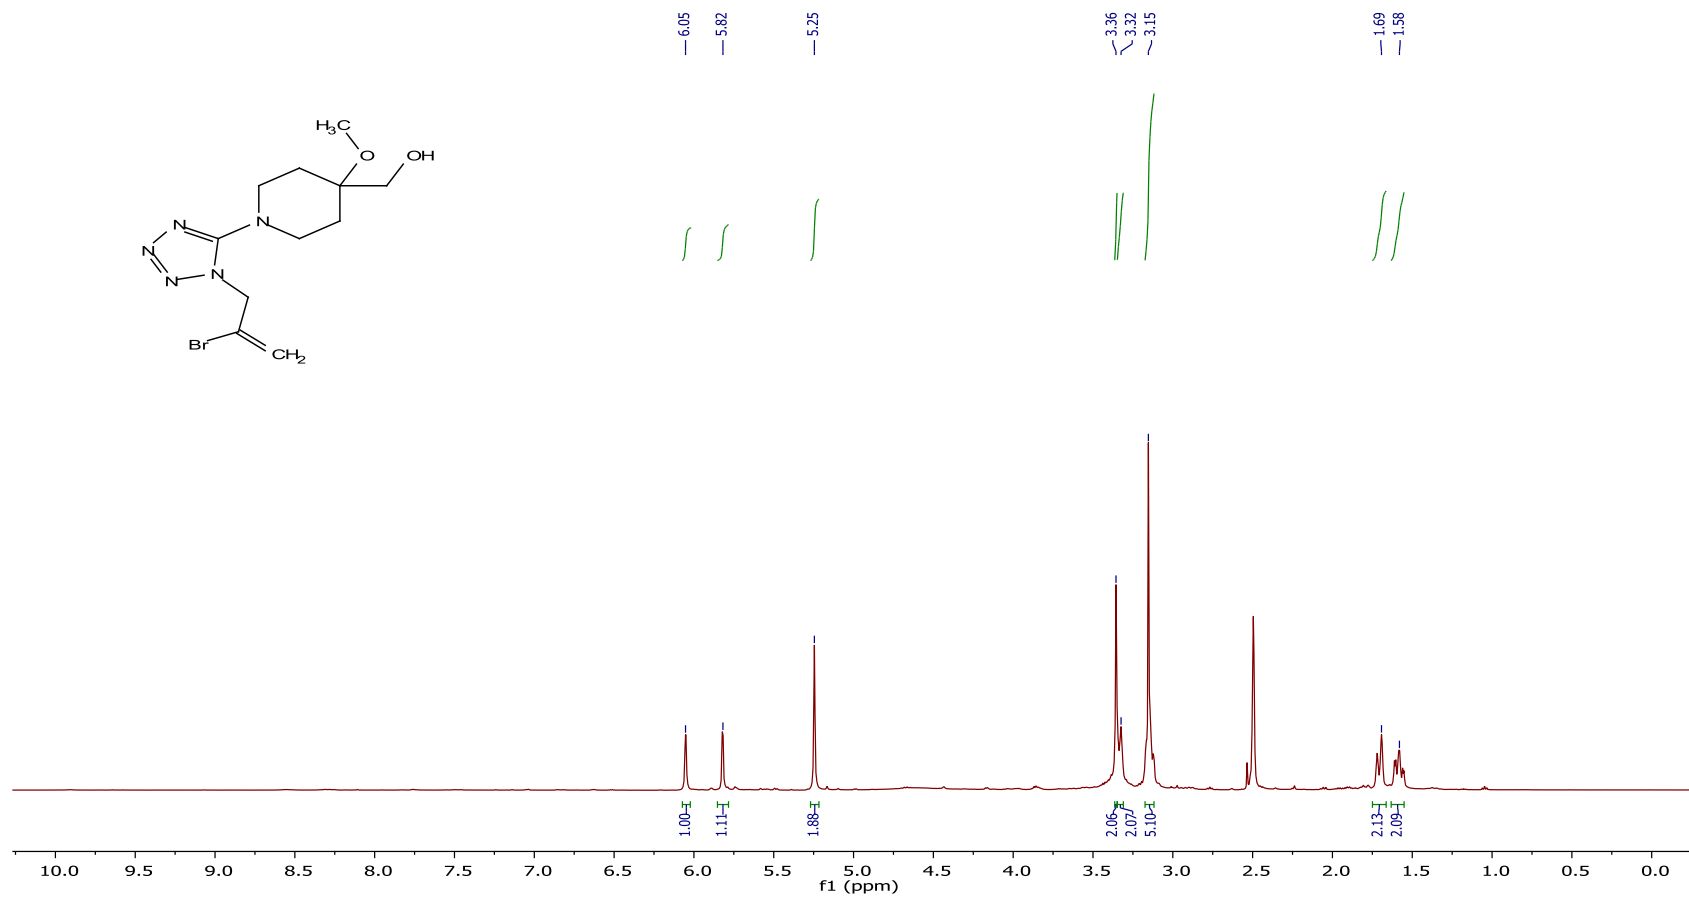

$^{13}\text{C}$  NMR spectrum of the compound **9**{165,299}.

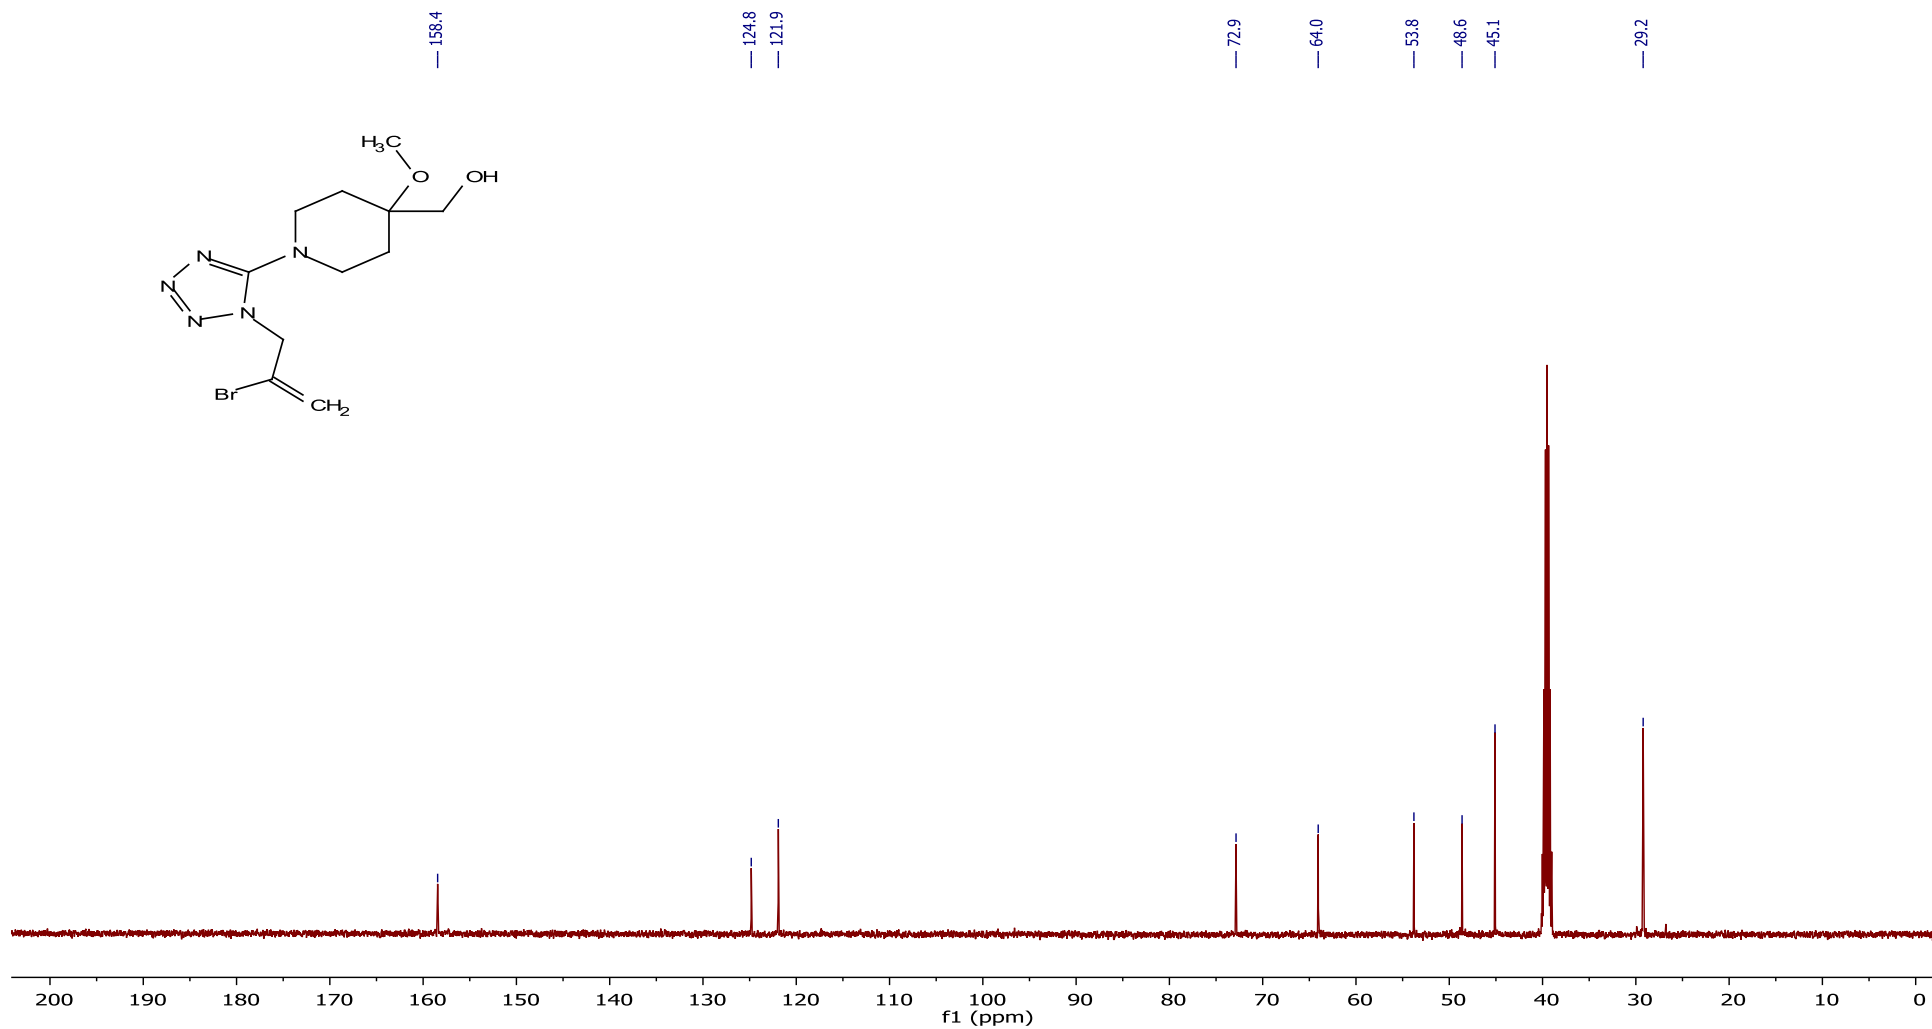

<sup>1</sup>H NMR spectrum of the compound **9**{175,299}.

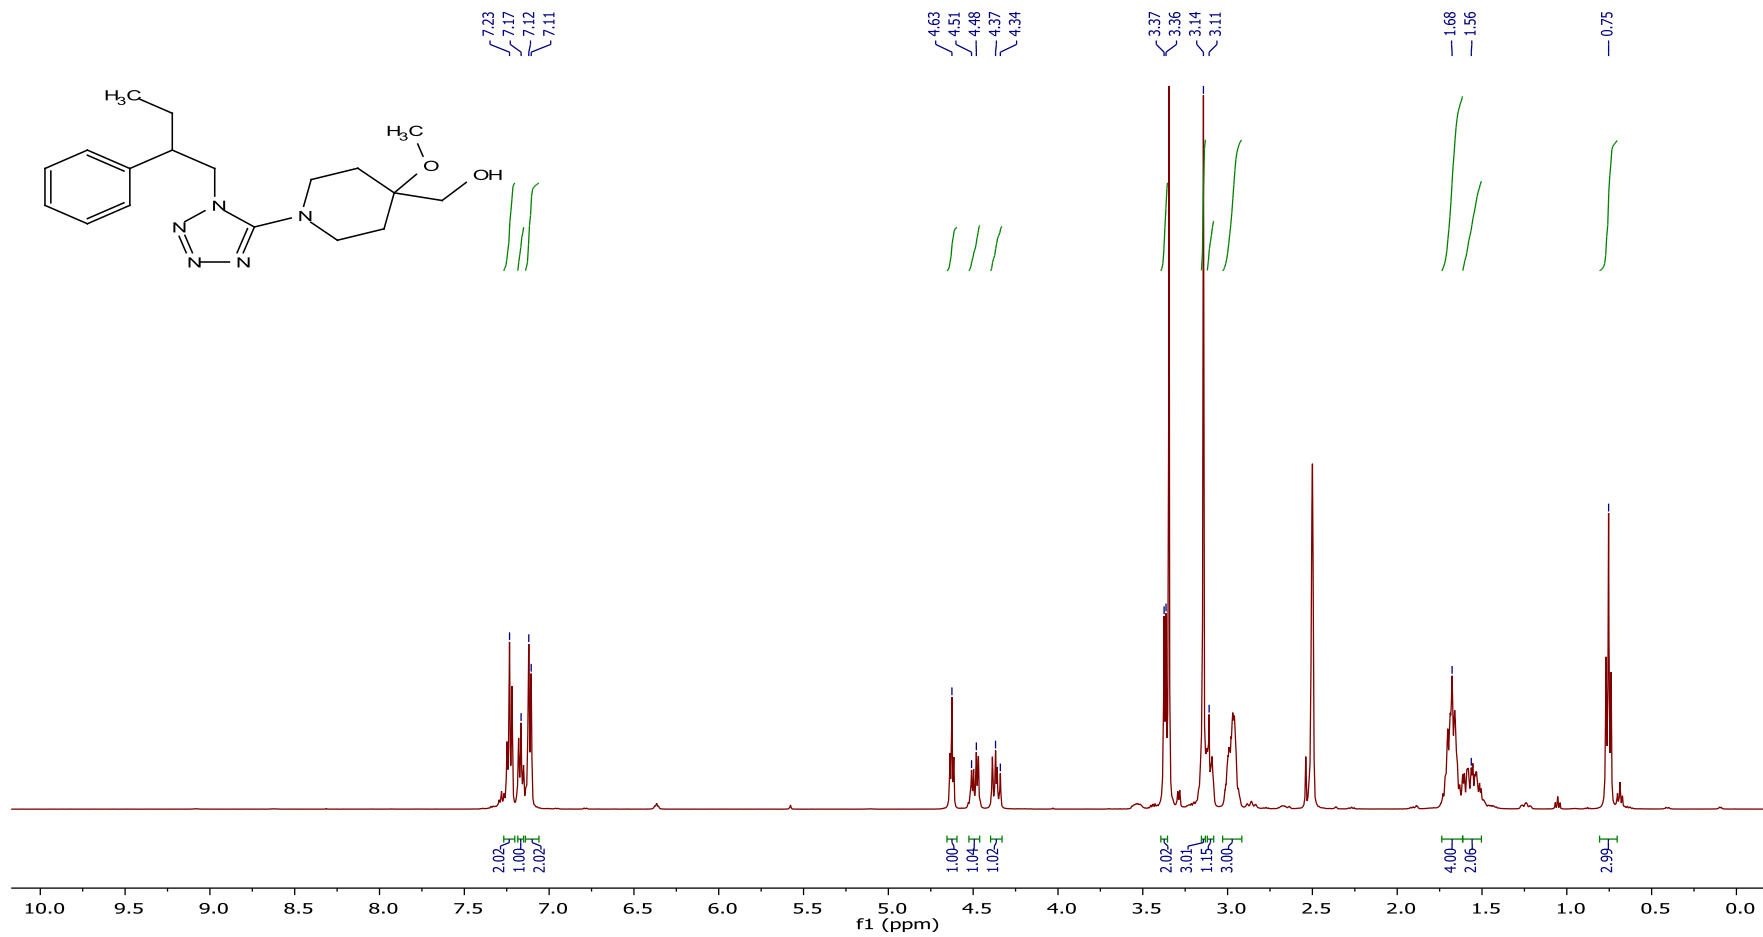

$^{13}\text{C}$  NMR spectrum of the compound **9**{175,299}.

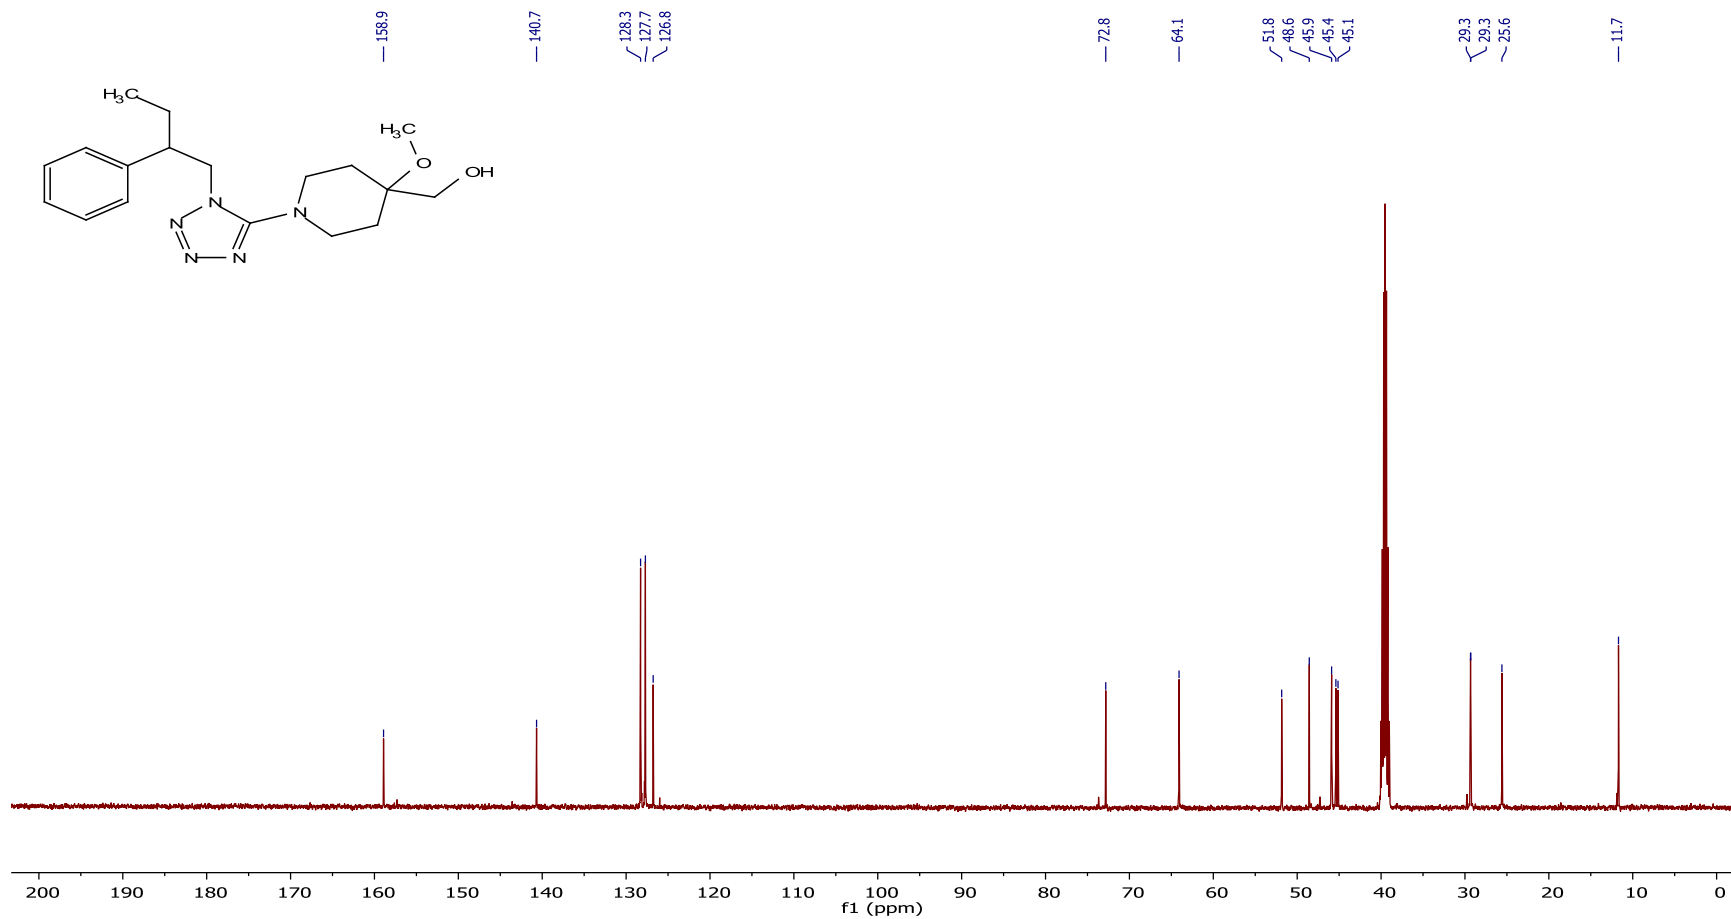



$^1\text{H}$  NMR spectrum of the compound **9**{188,338}.

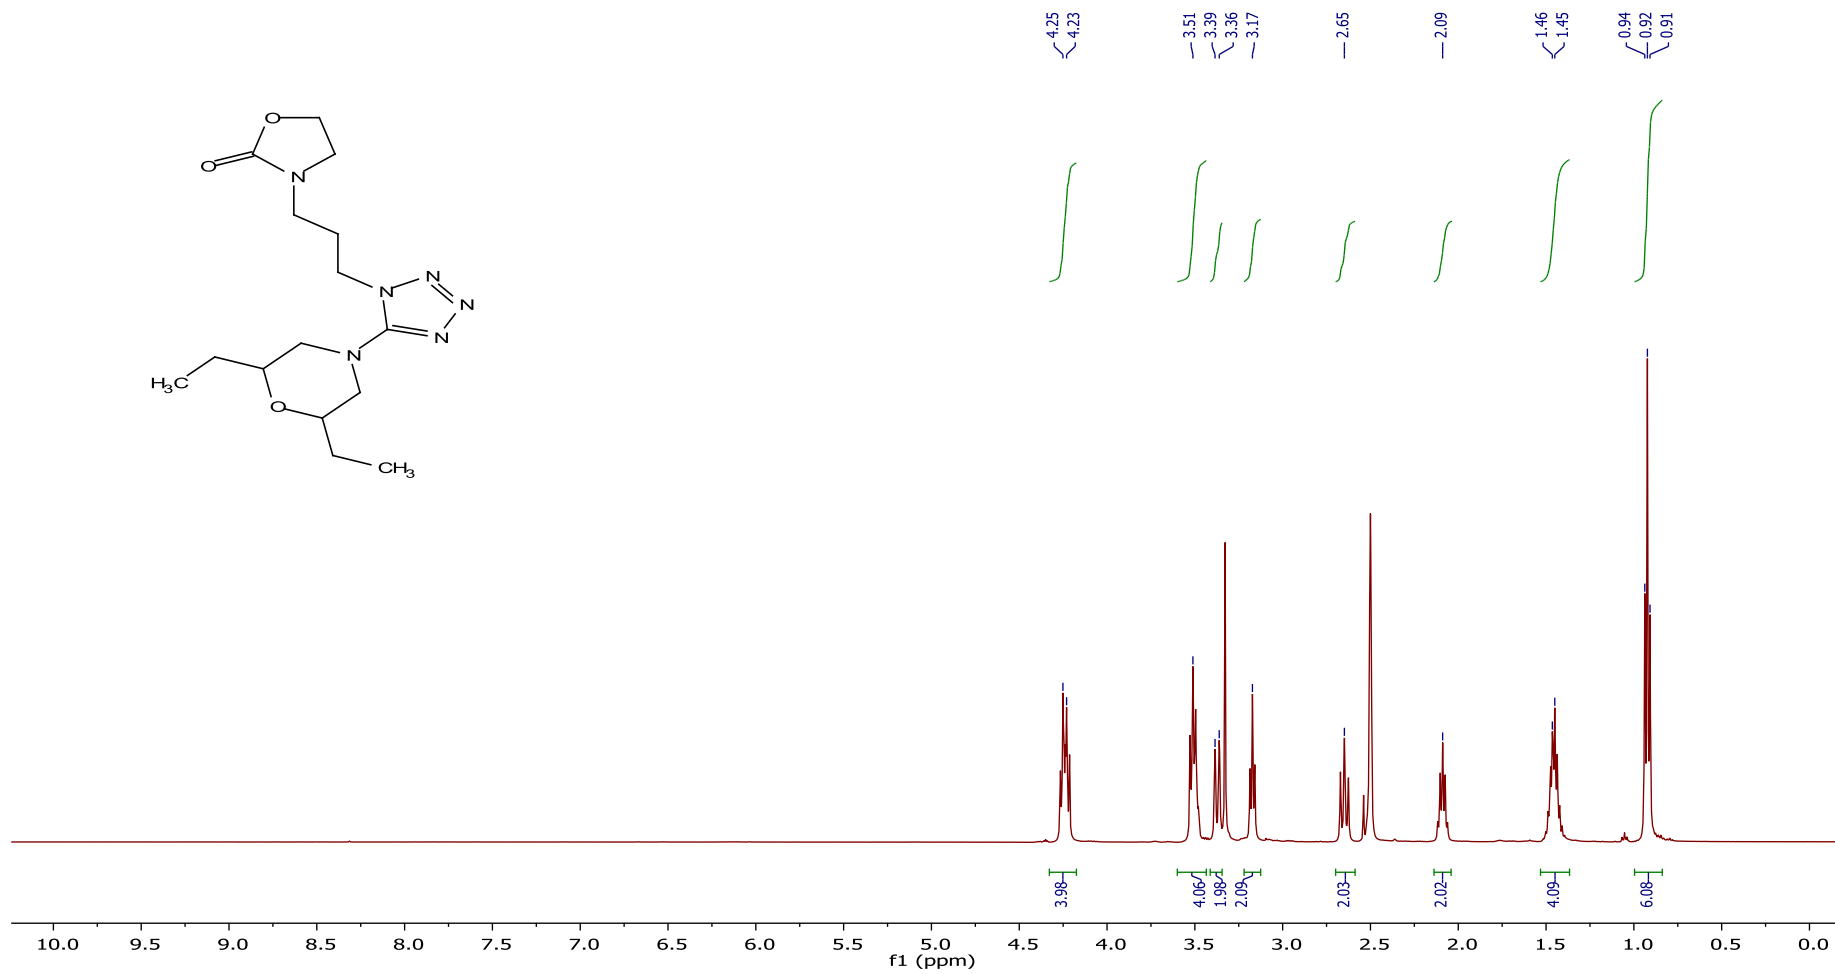

$^{13}\text{C}$  NMR spectrum of the compound **9**{188,338}.

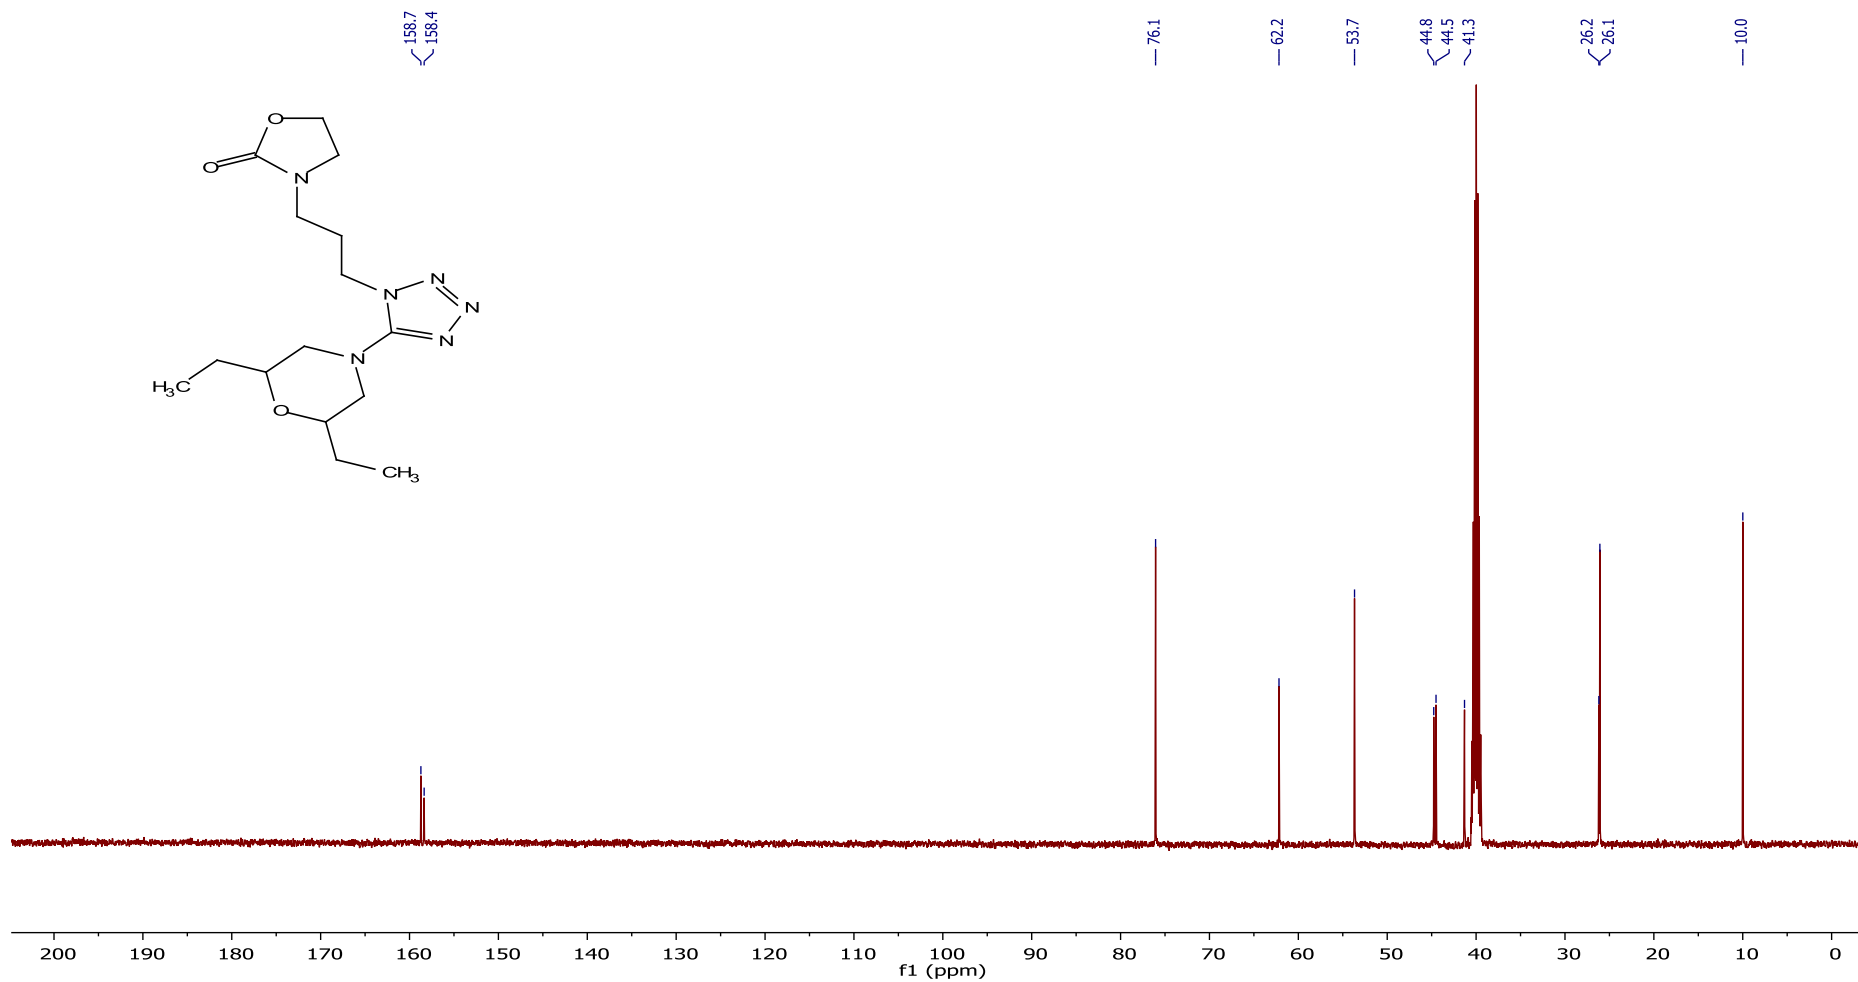

<sup>1</sup>H NMR spectrum of the compound **9**{190,341}.

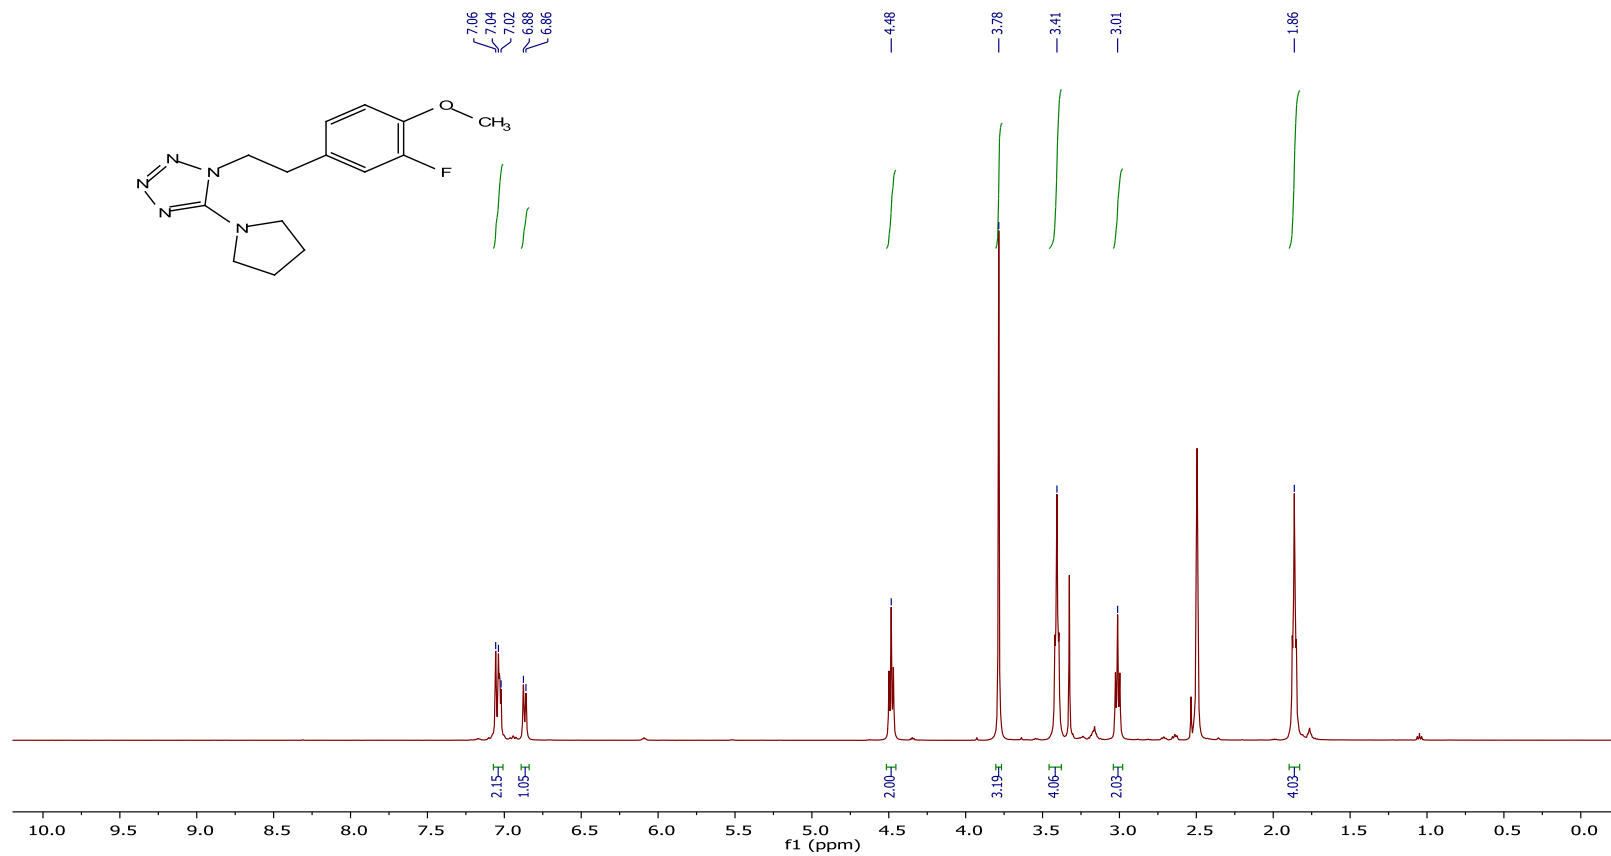

$^{13}\text{C}$  NMR spectrum of the compound **9**{190,341}.

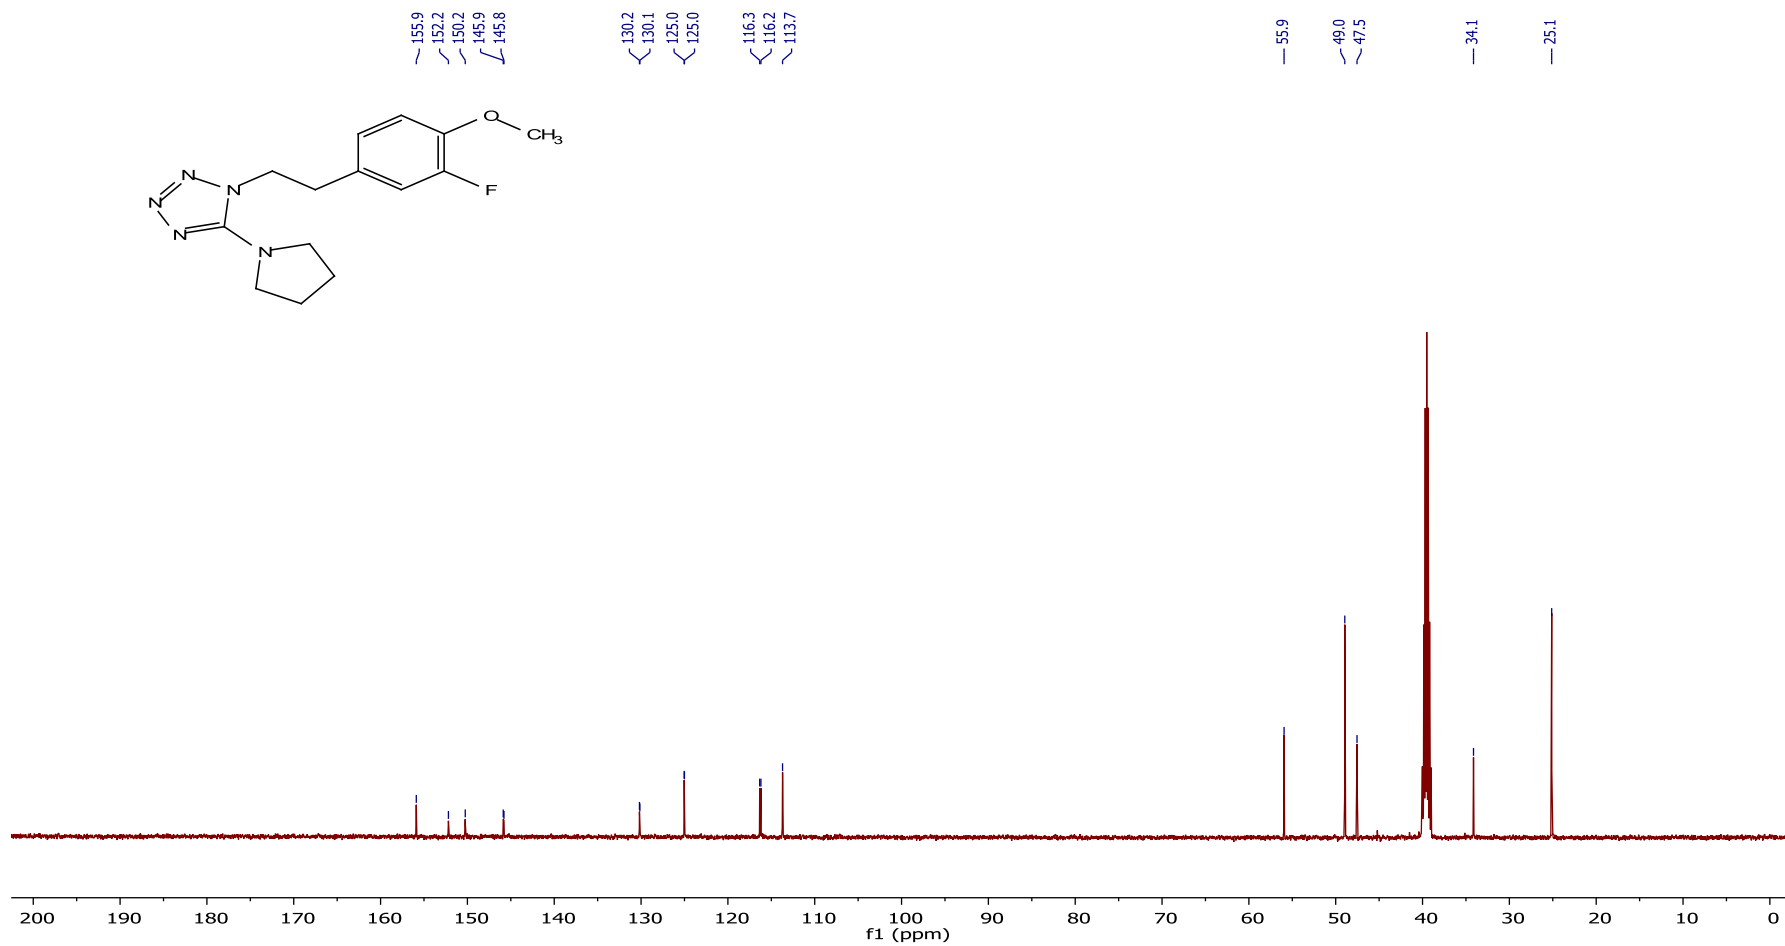

$^{19}\text{F}$  NMR spectrum of the compound **9**{190,341}.

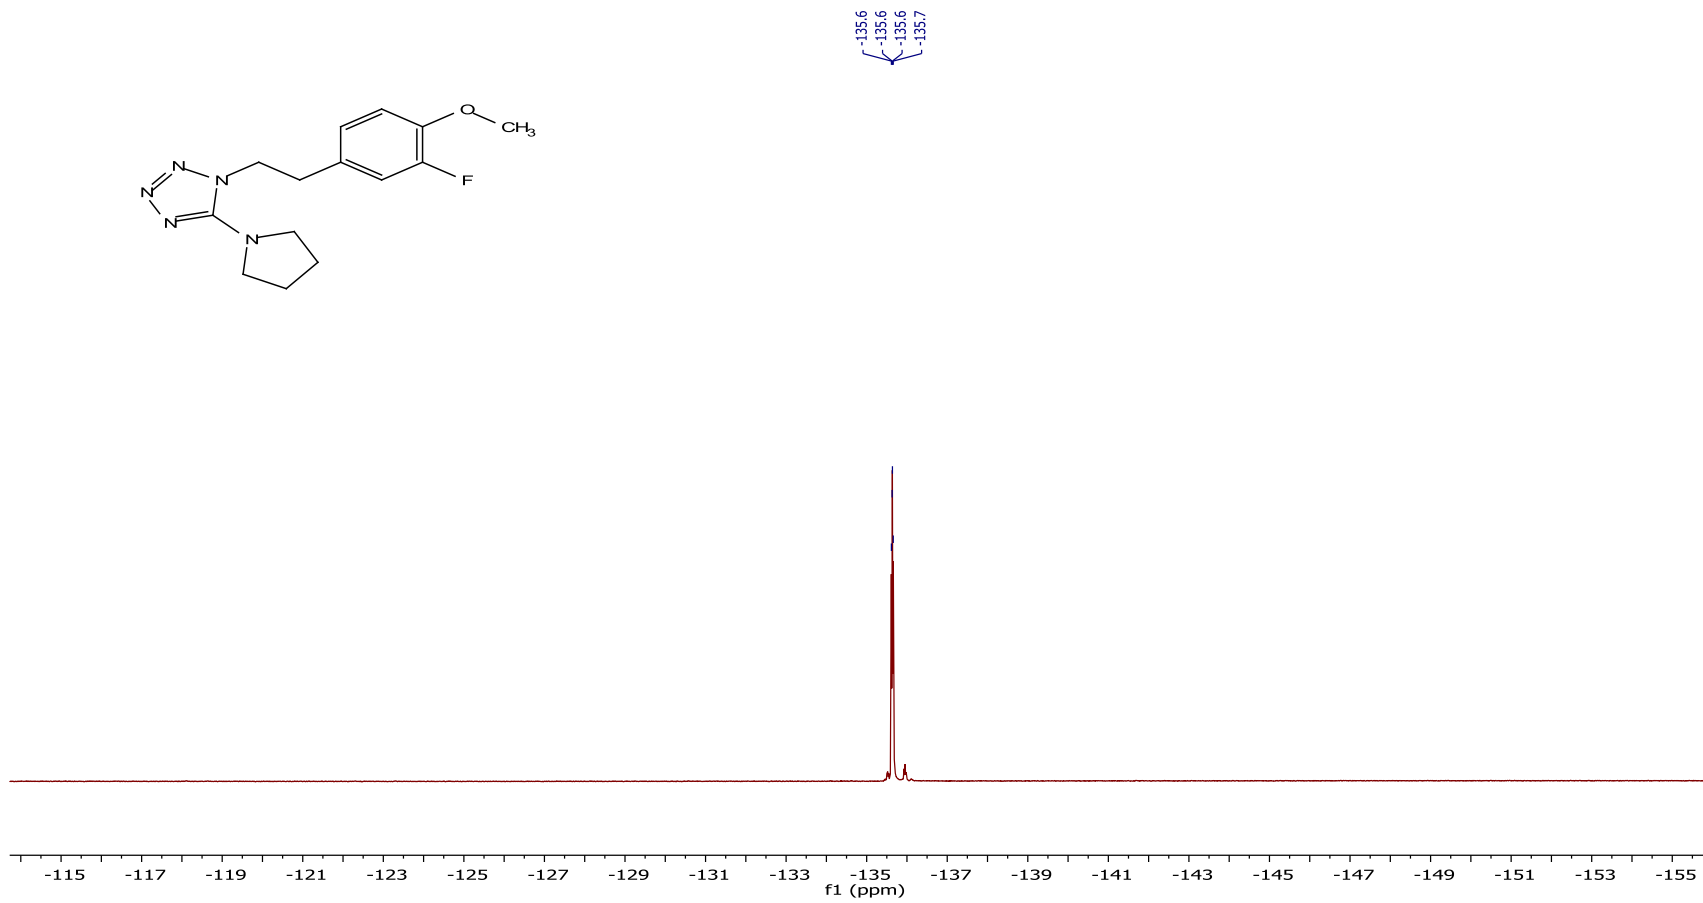

<sup>1</sup>H NMR spectrum of the compound **9**{262,319}.

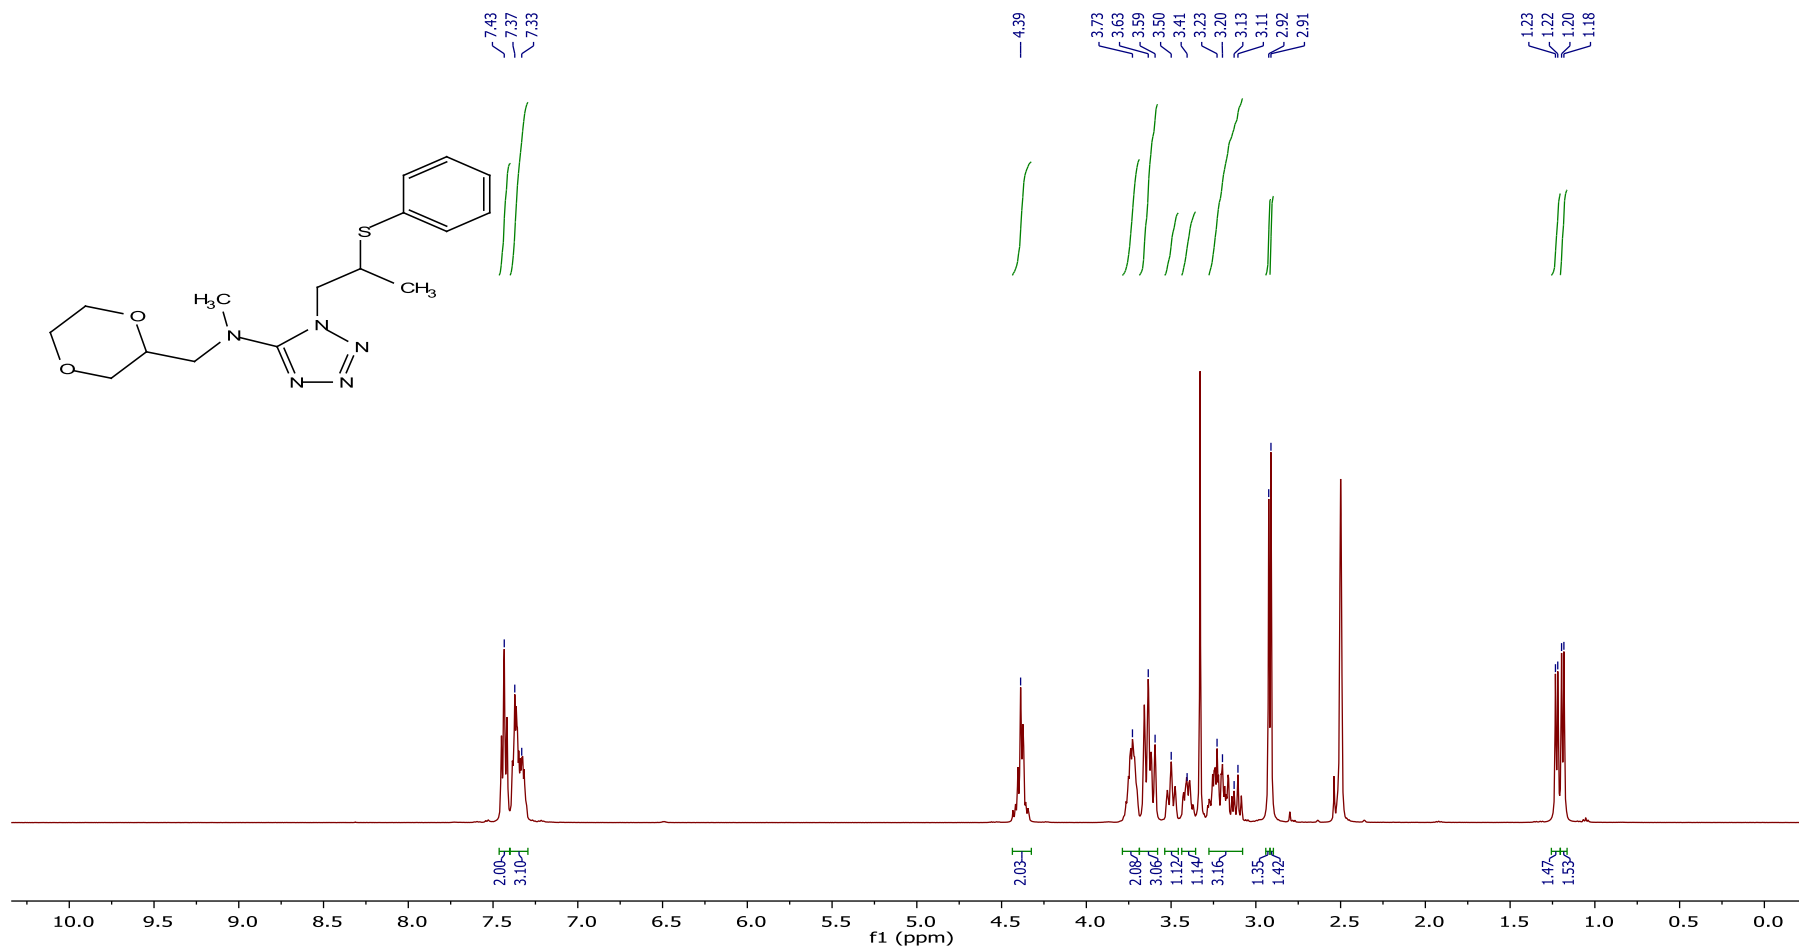

$^{13}\text{C}$  NMR spectrum of the compound **9**{262,319}.

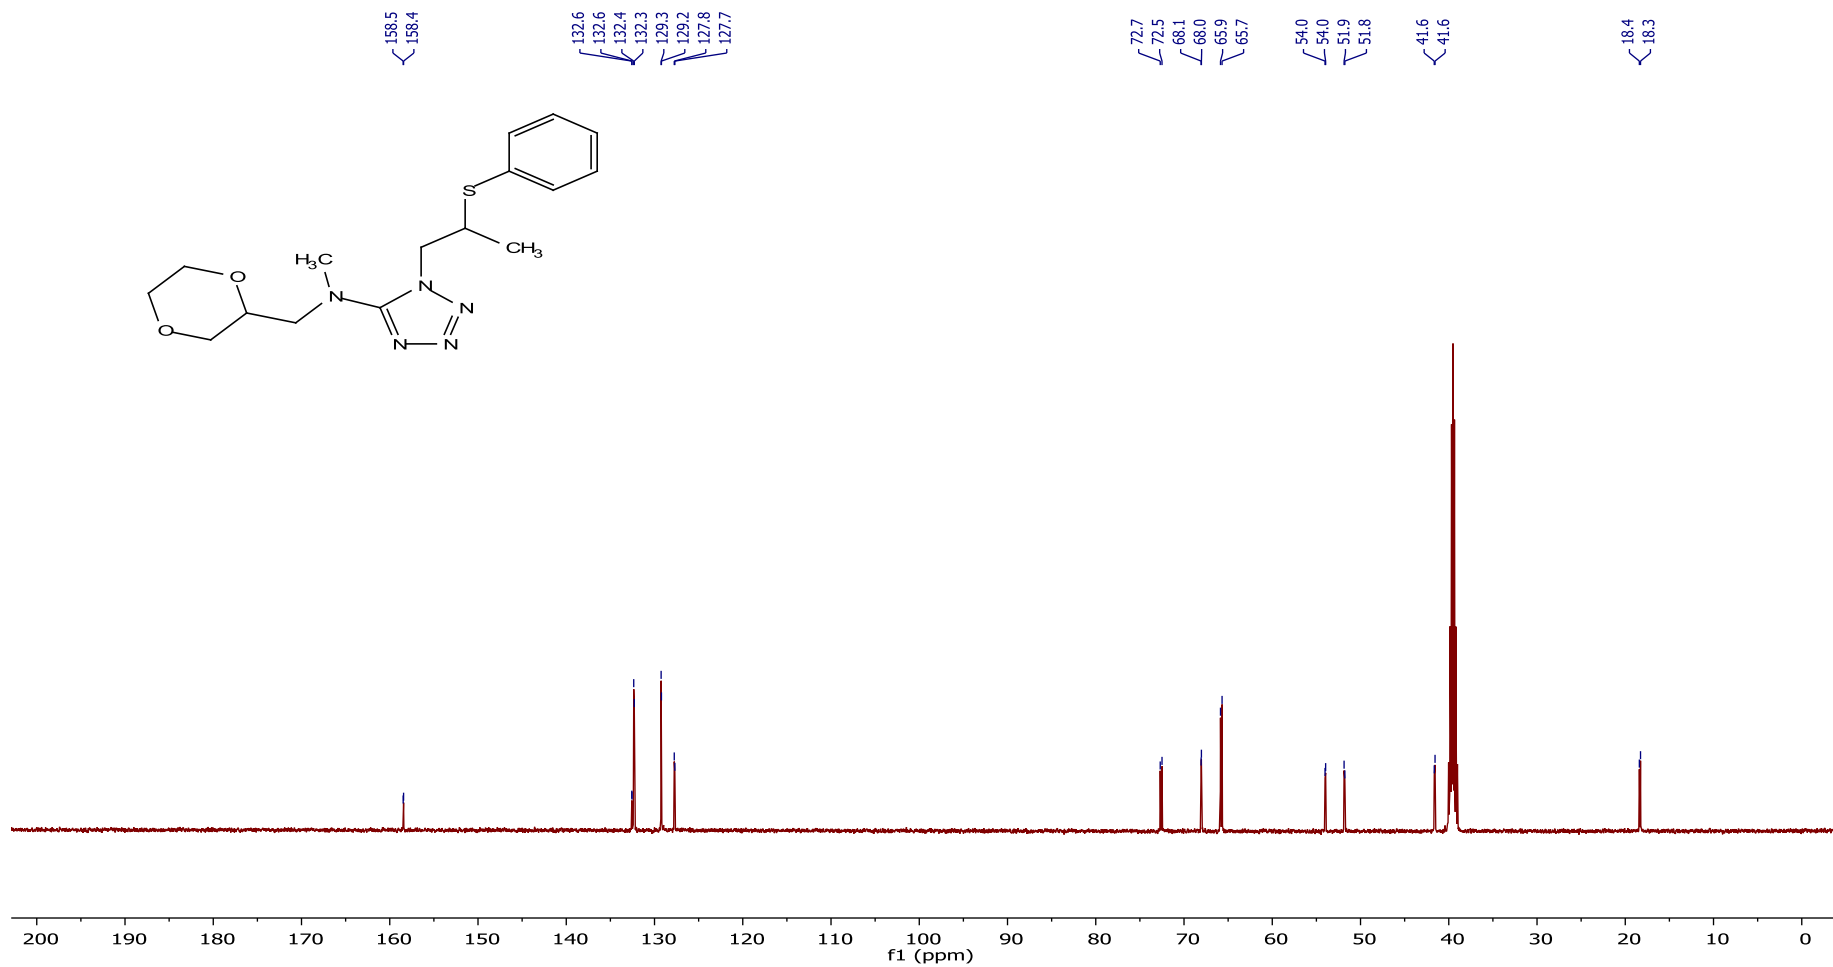

<sup>1</sup>H NMR spectrum of the compound **9**{263,341}.

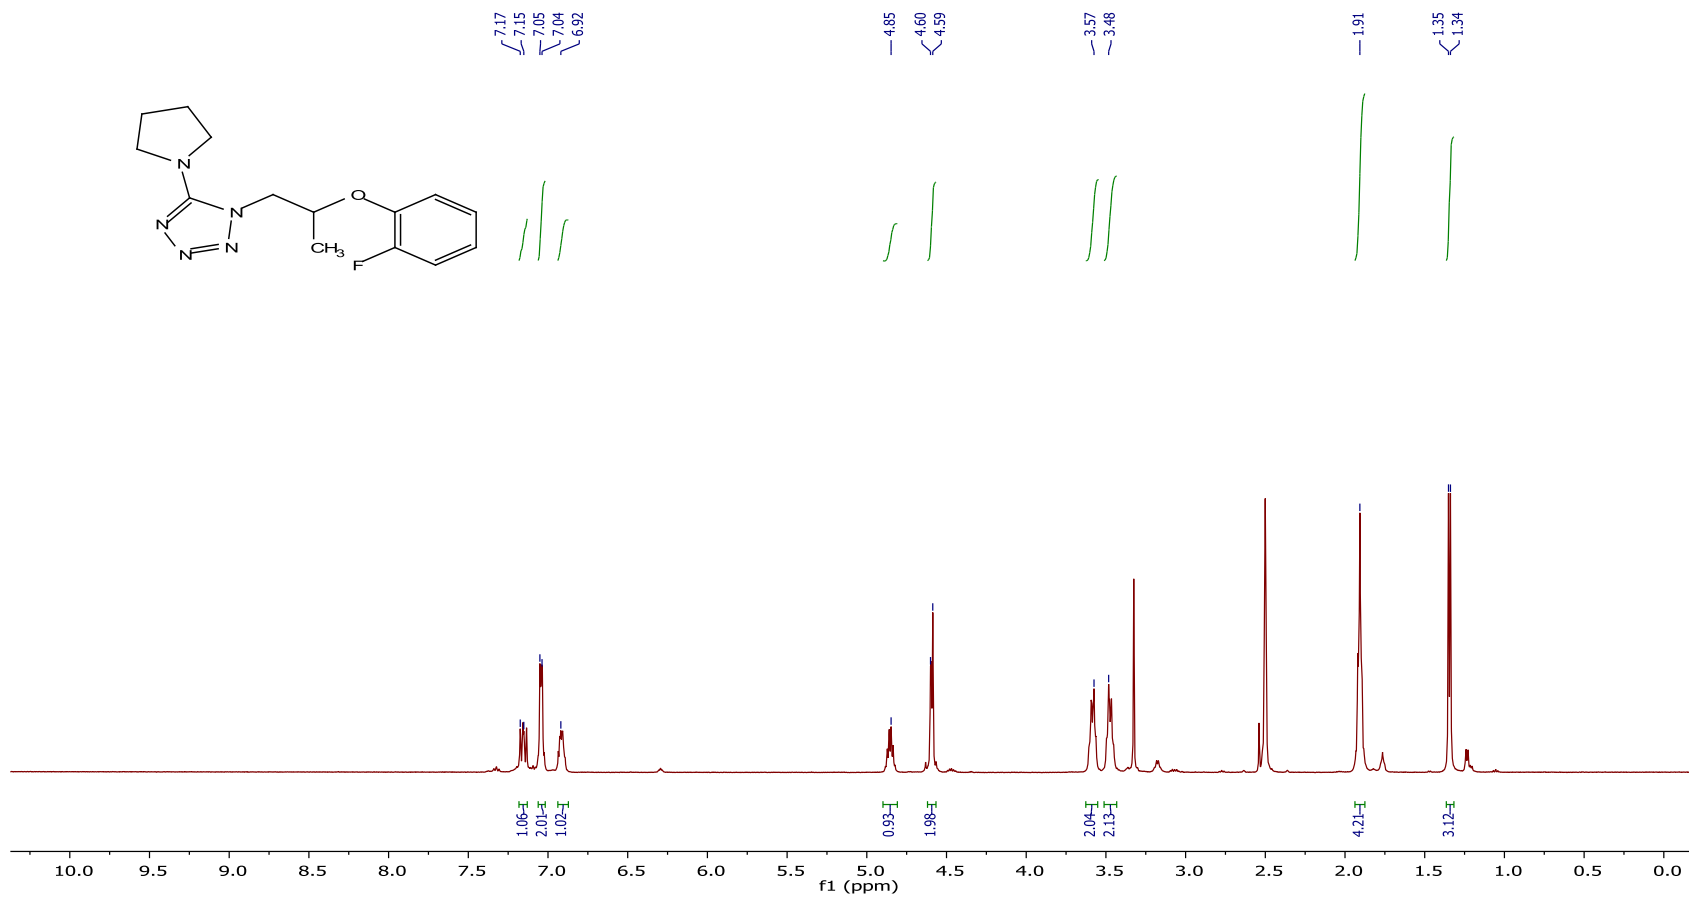



$^{13}\text{C}$  NMR spectrum of the compound **9**{263,341}.

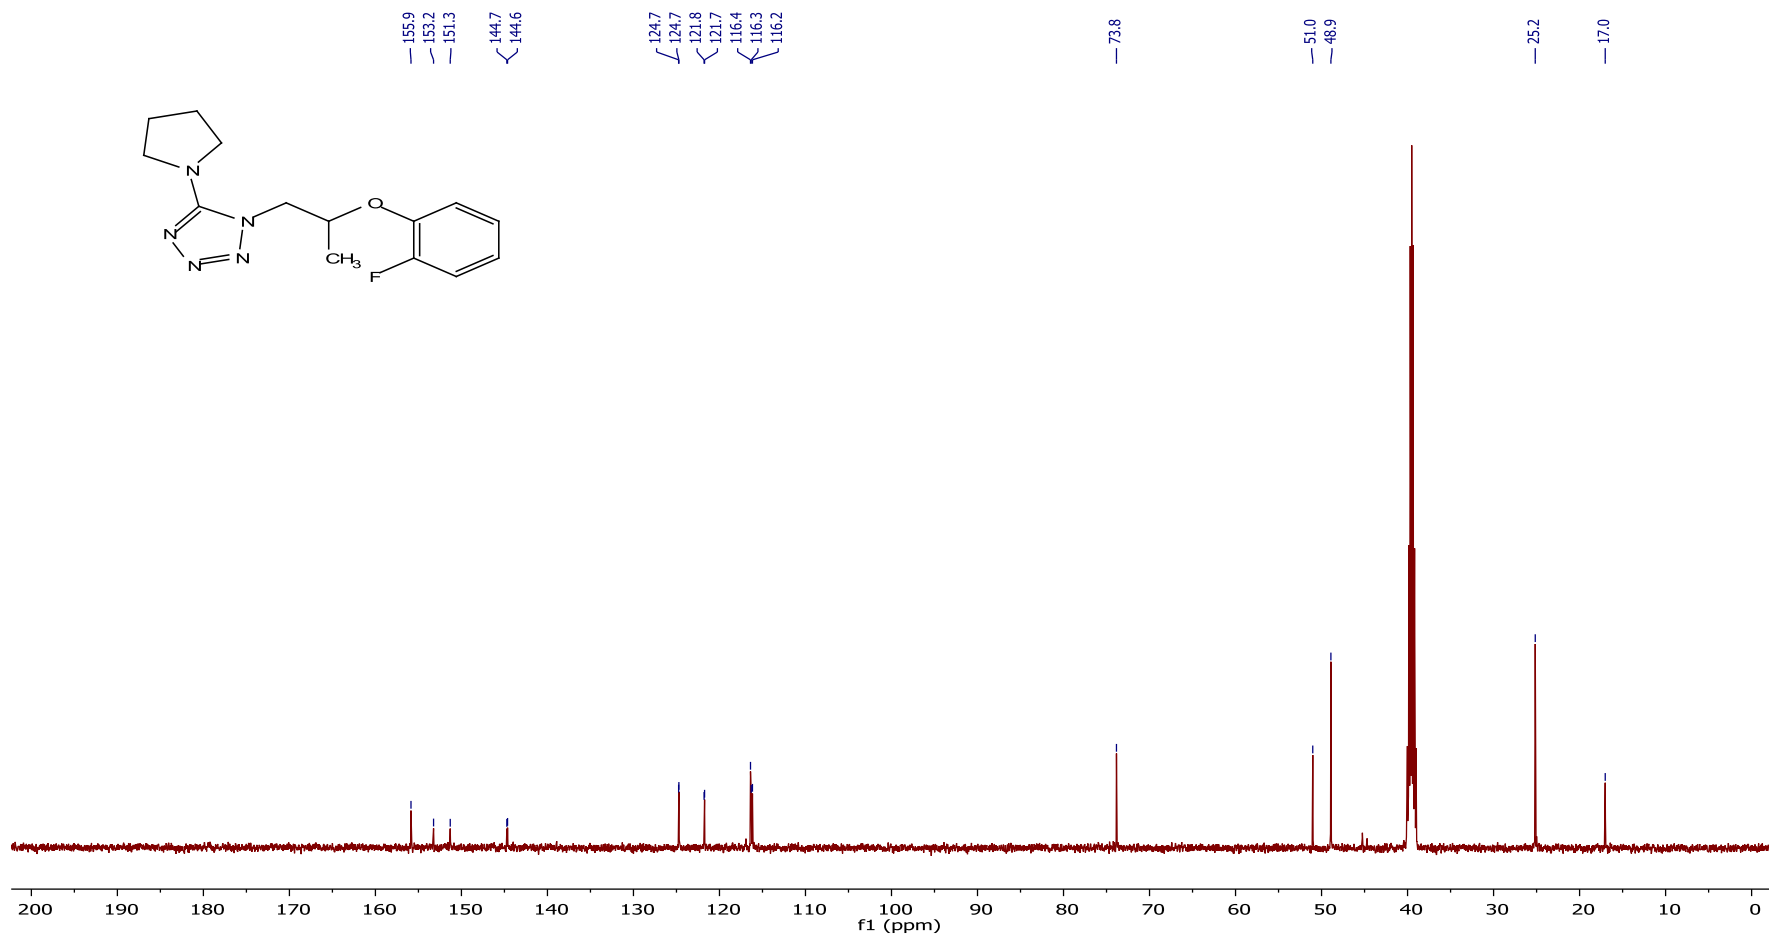

$^{19}\text{F}$  NMR spectrum of the compound **9**{263,341}.

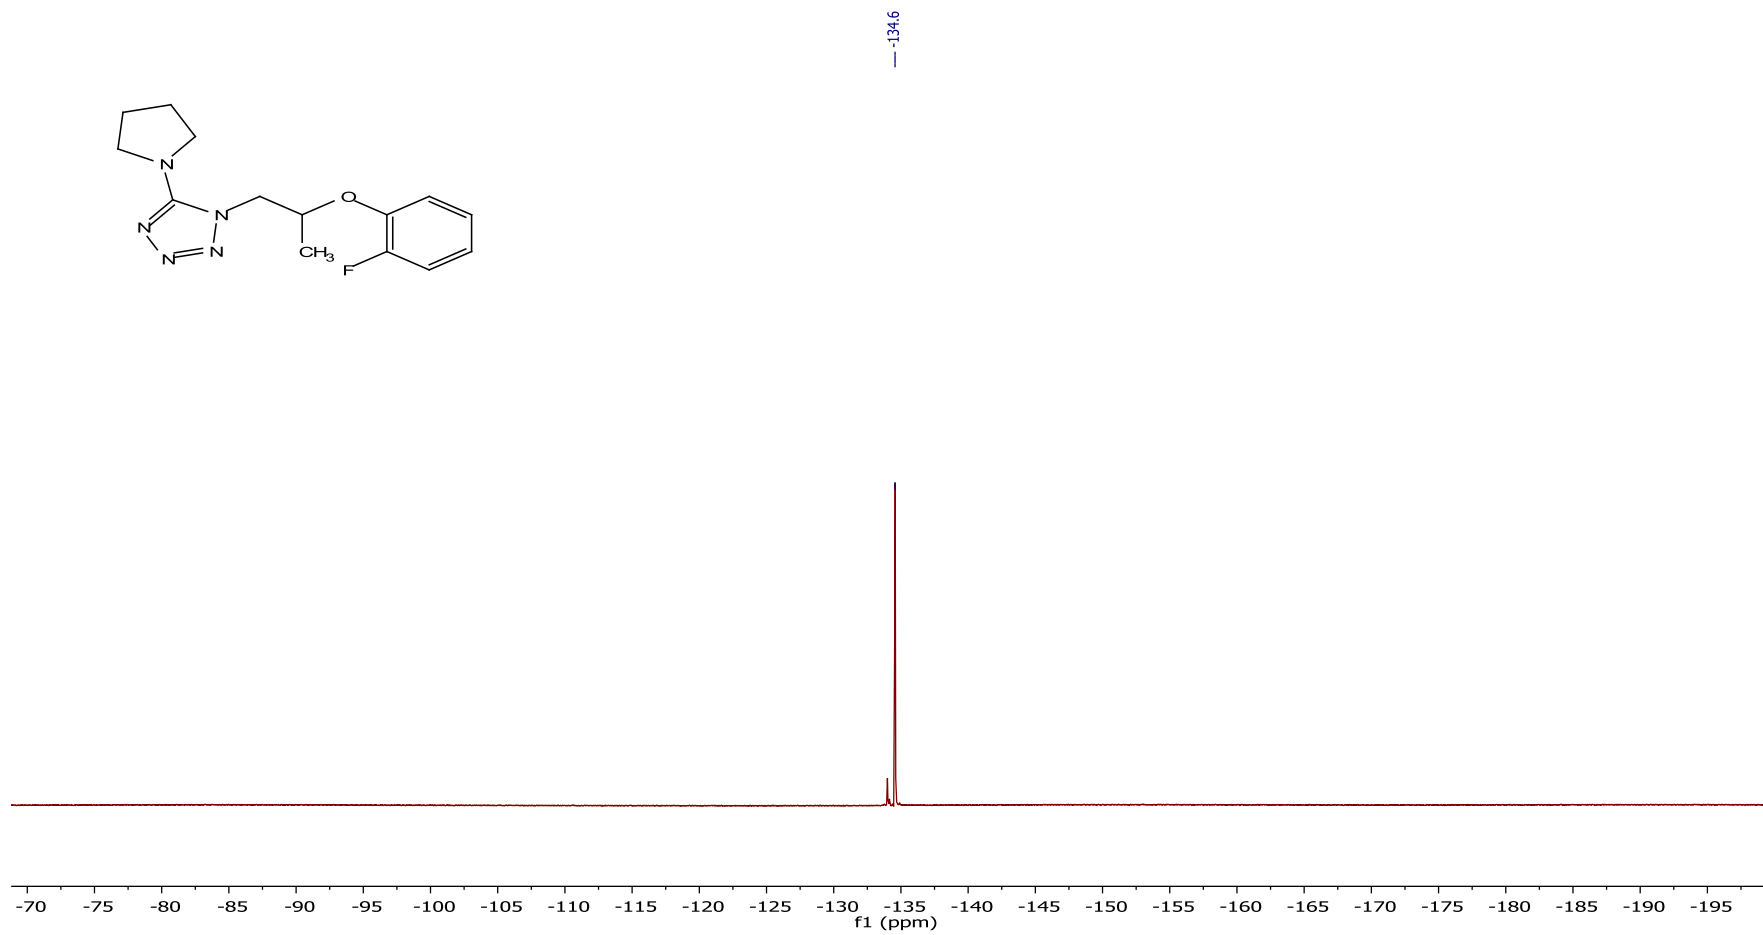

<sup>1</sup>H NMR spectrum of the compound **9**{272,319}.

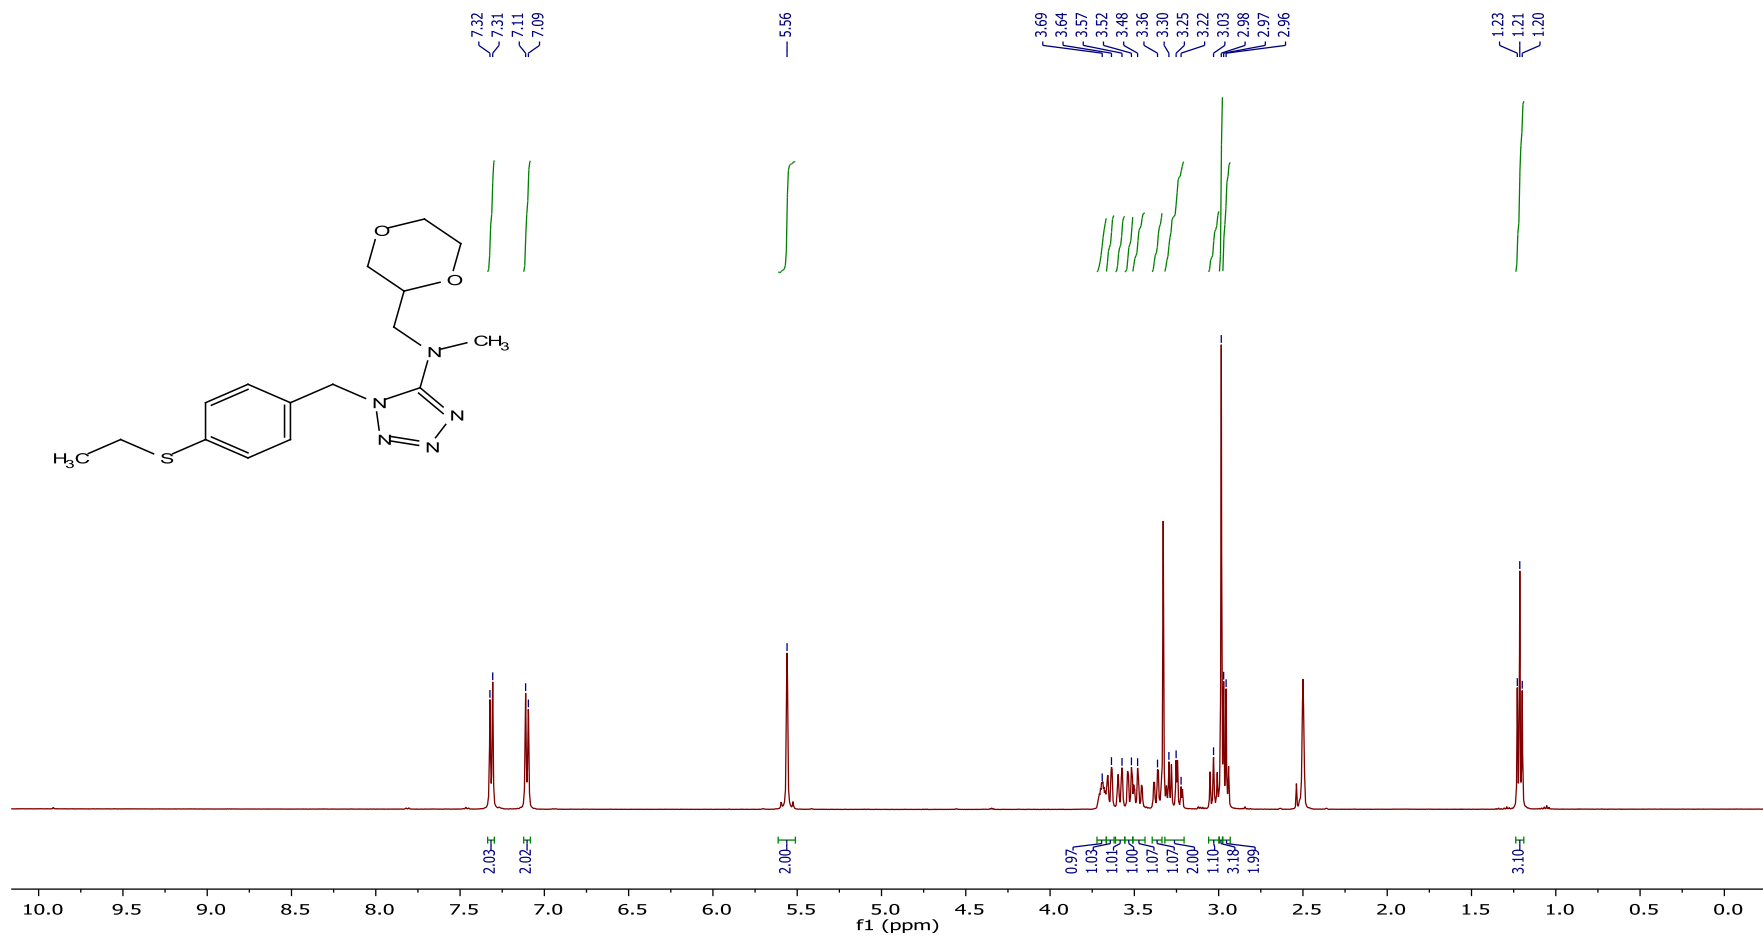

$^{13}\text{C}$  NMR spectrum of the compound **9**{272,319}.

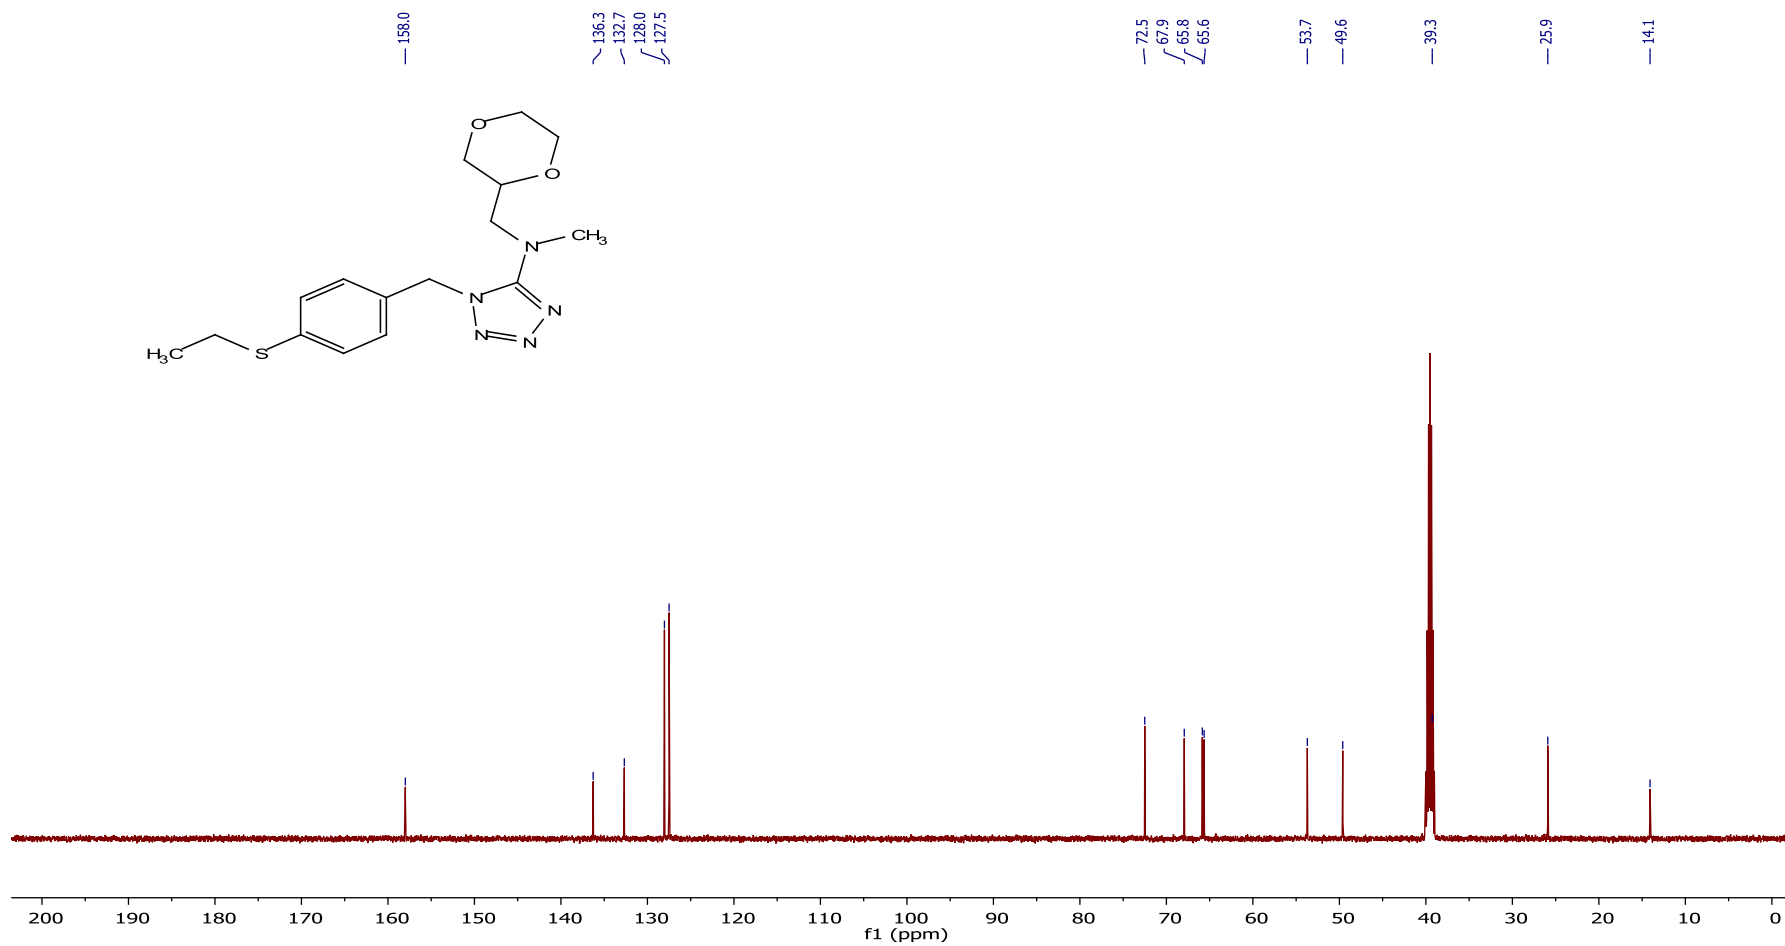

<sup>1</sup>H NMR spectrum of the compound **9**{280,391}.

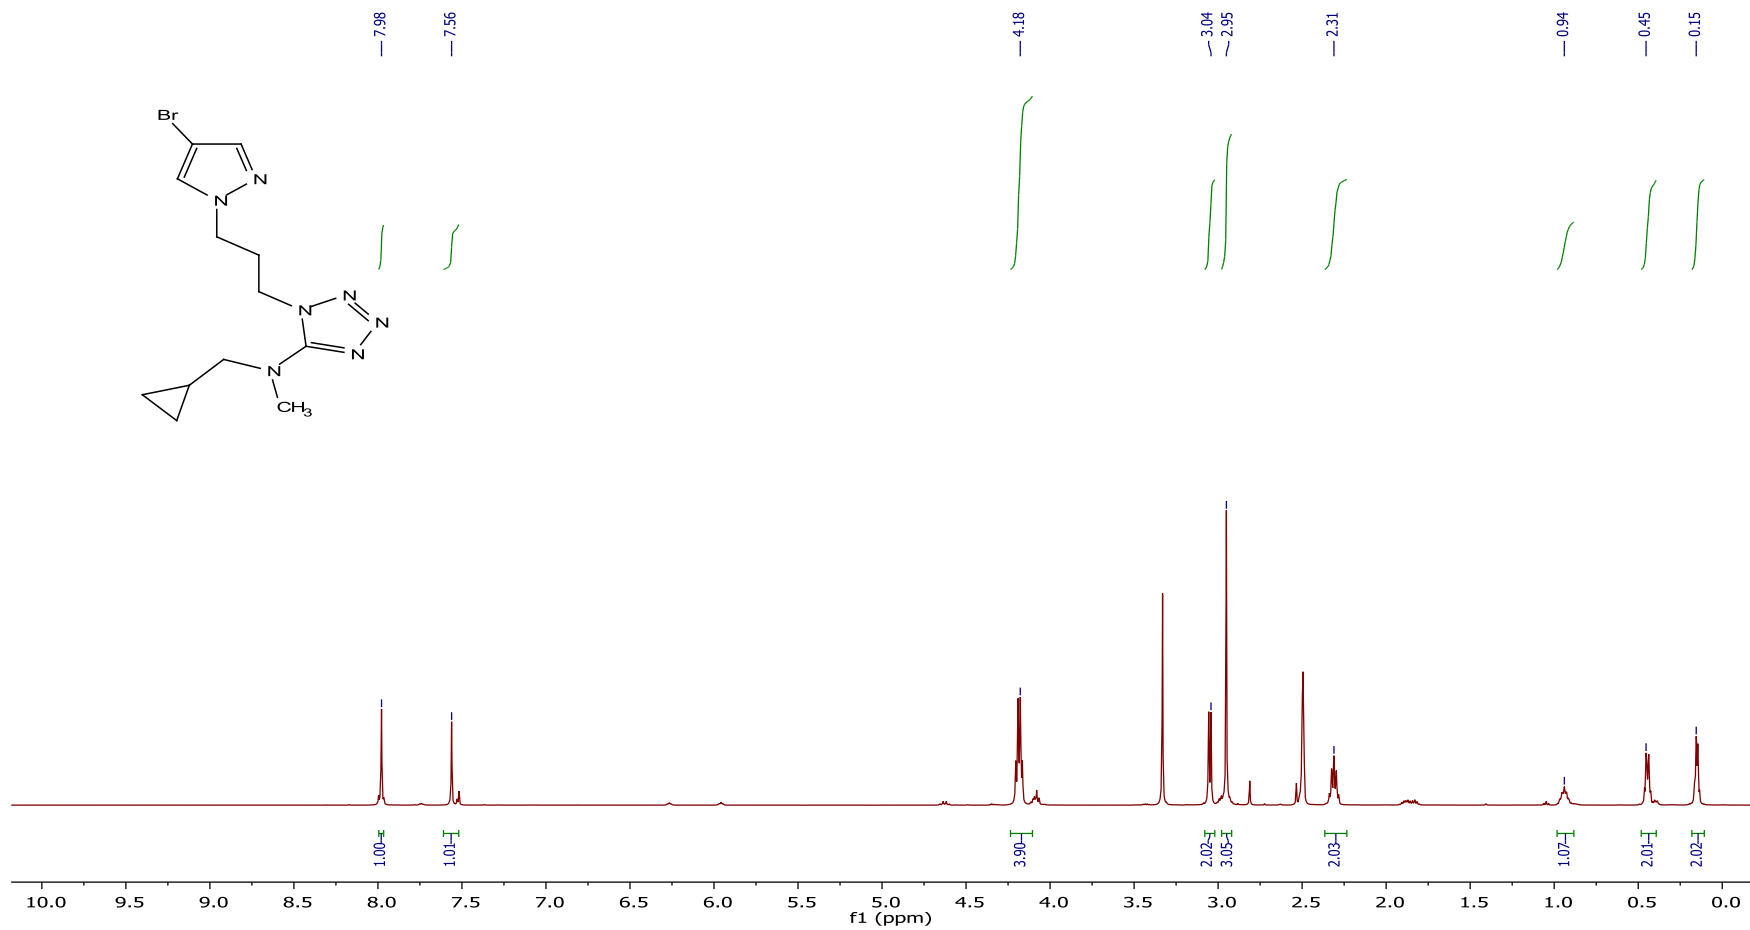

$^{13}\text{C}$  NMR spectrum of the compound **9**{280,391}.

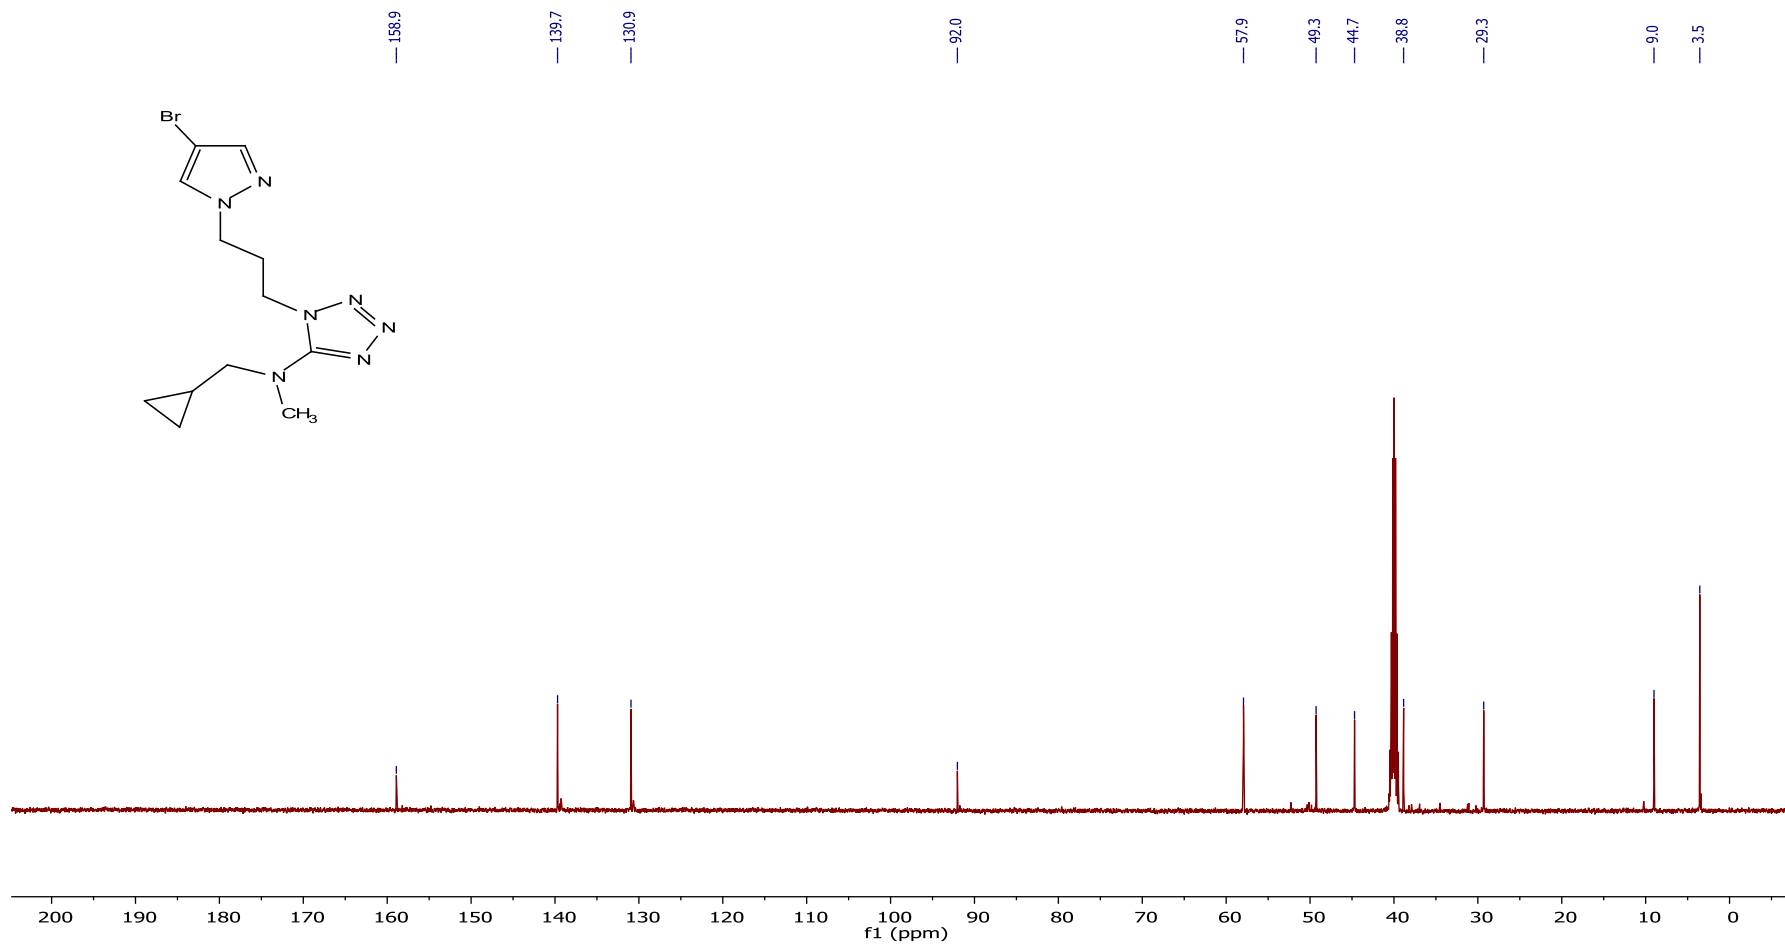

<sup>1</sup>H NMR spectrum of the compound **9**{306,261}.

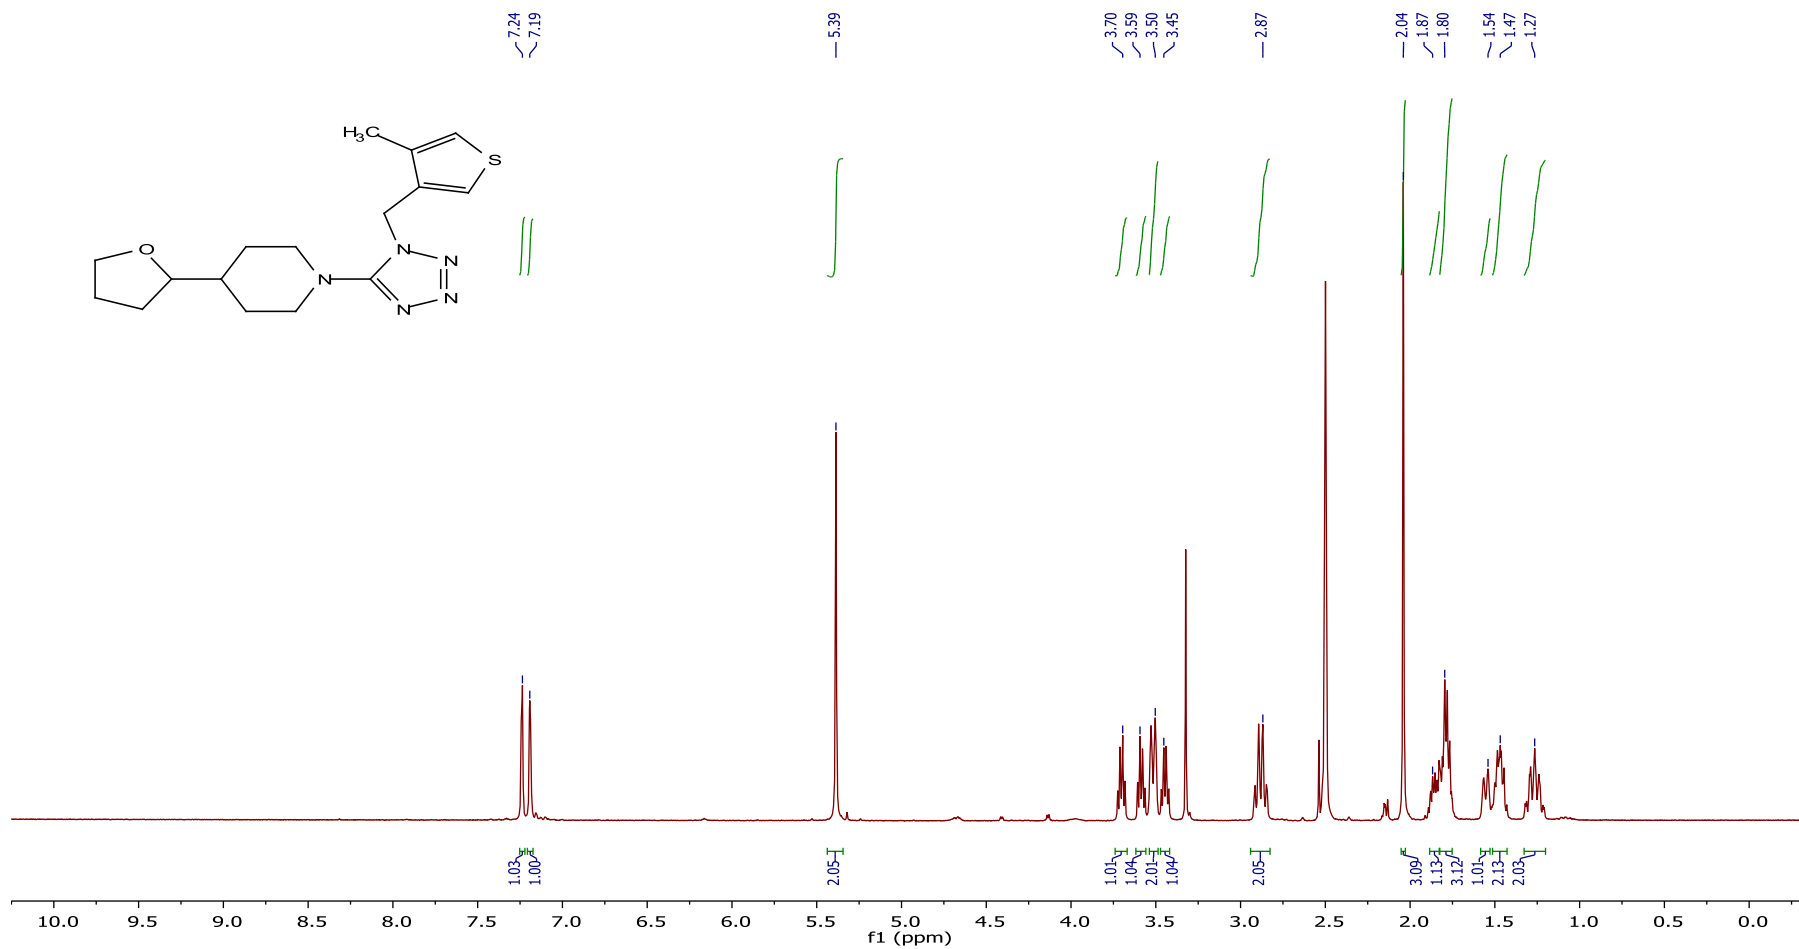

$^{13}\text{C}$  NMR spectrum of the compound **9**{306,261}.

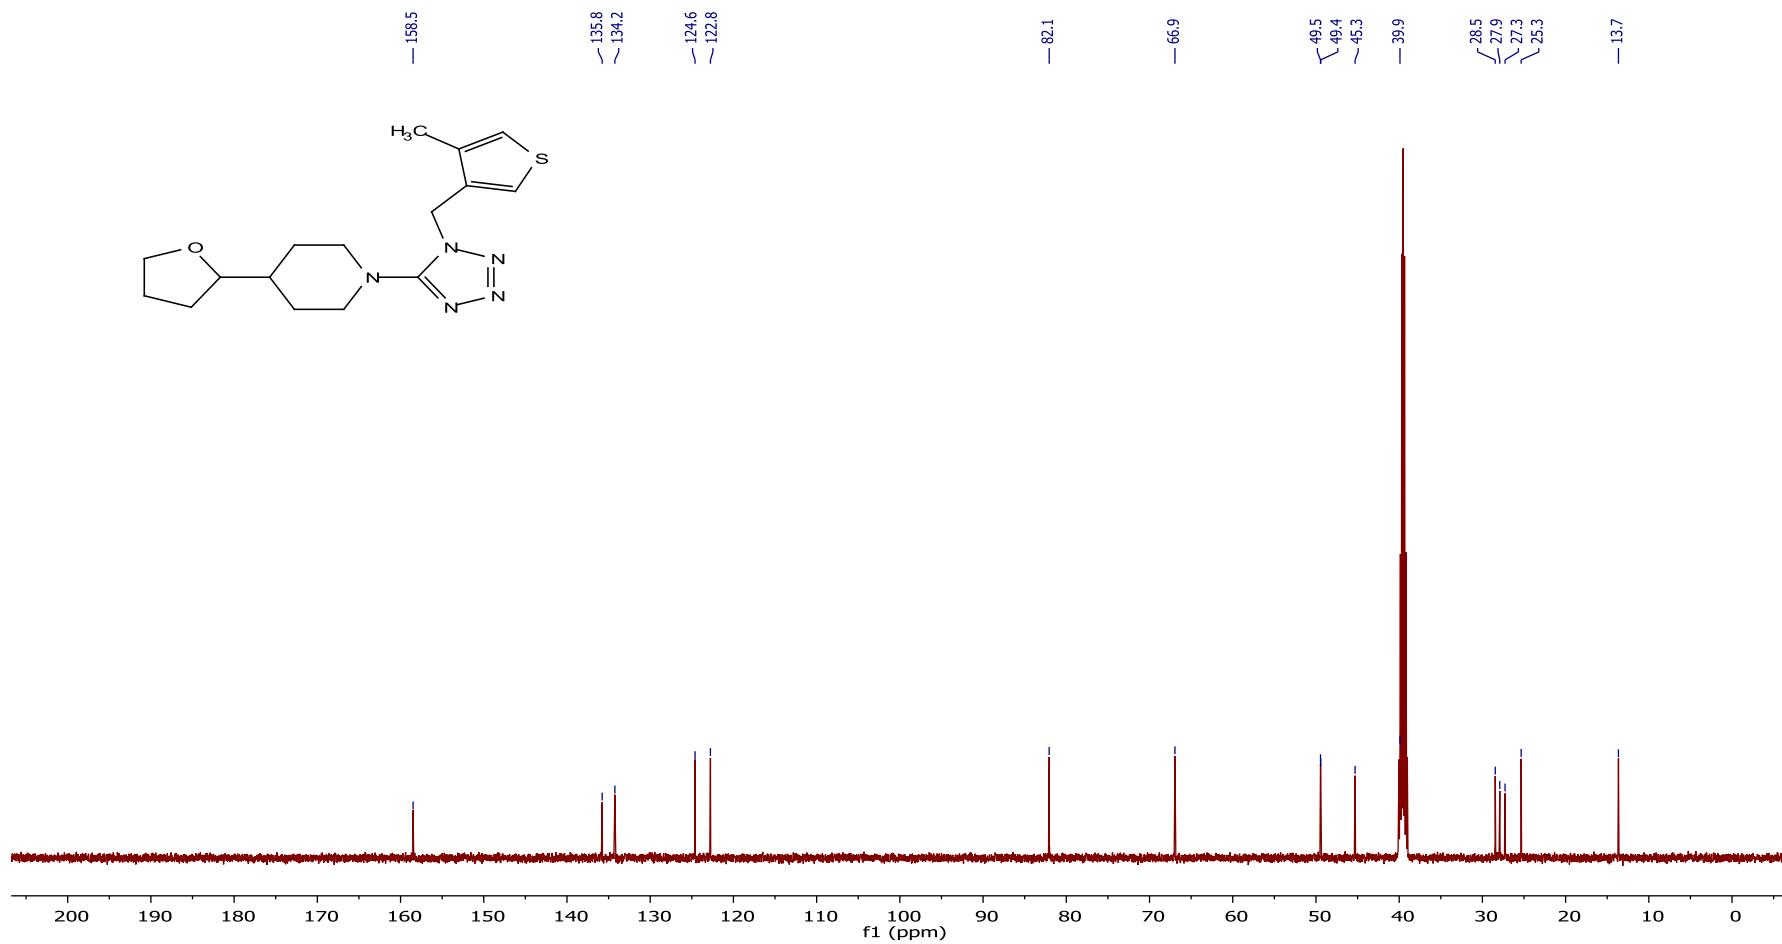



<sup>1</sup>H NMR spectrum of the compound **9**{341,346}.

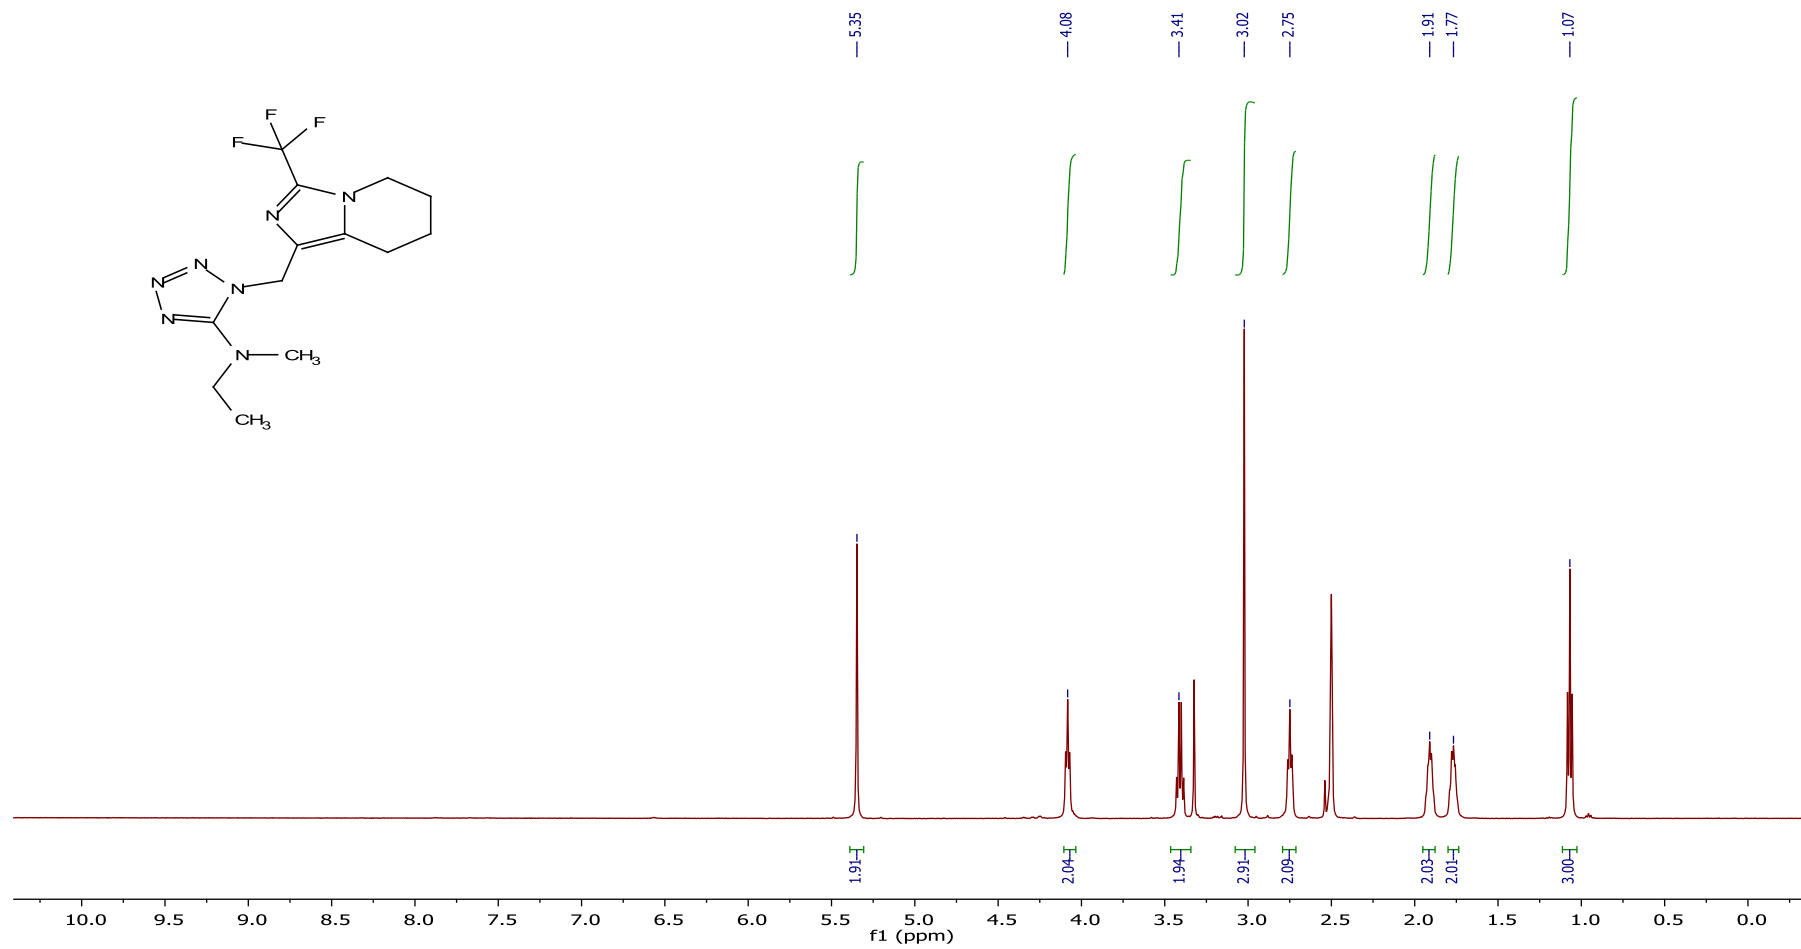

$^{13}\text{C}$  NMR spectrum of the compound **9**{341,346}.

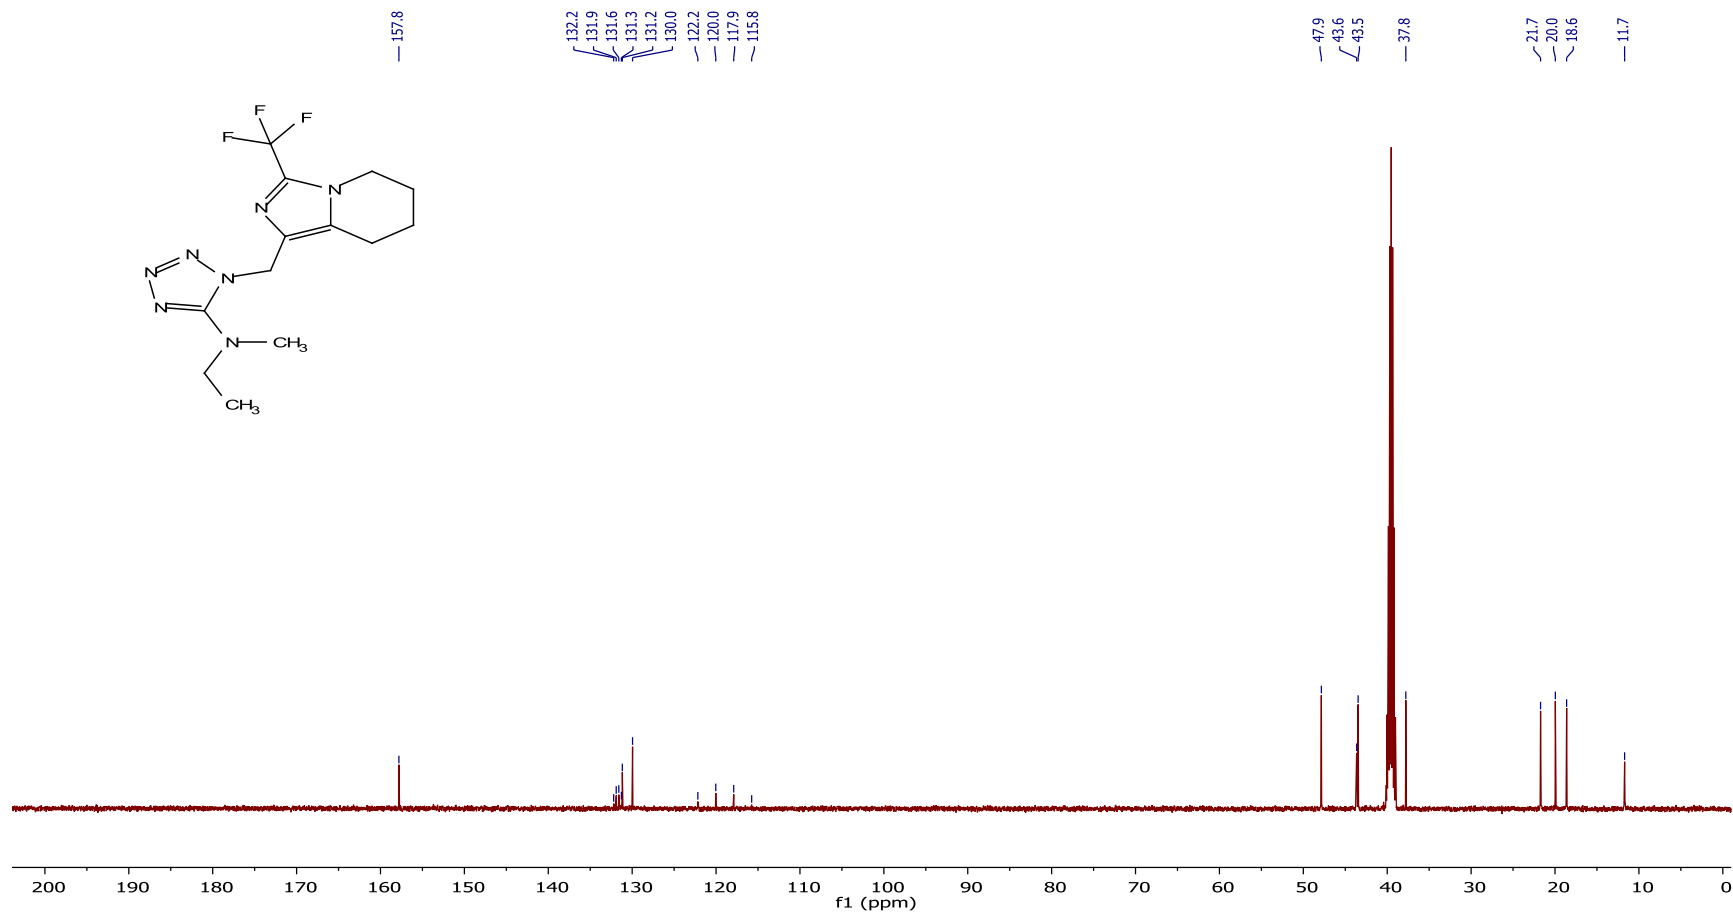

$^{19}\text{F}$  NMR spectrum of the compound **9**{341,346}.

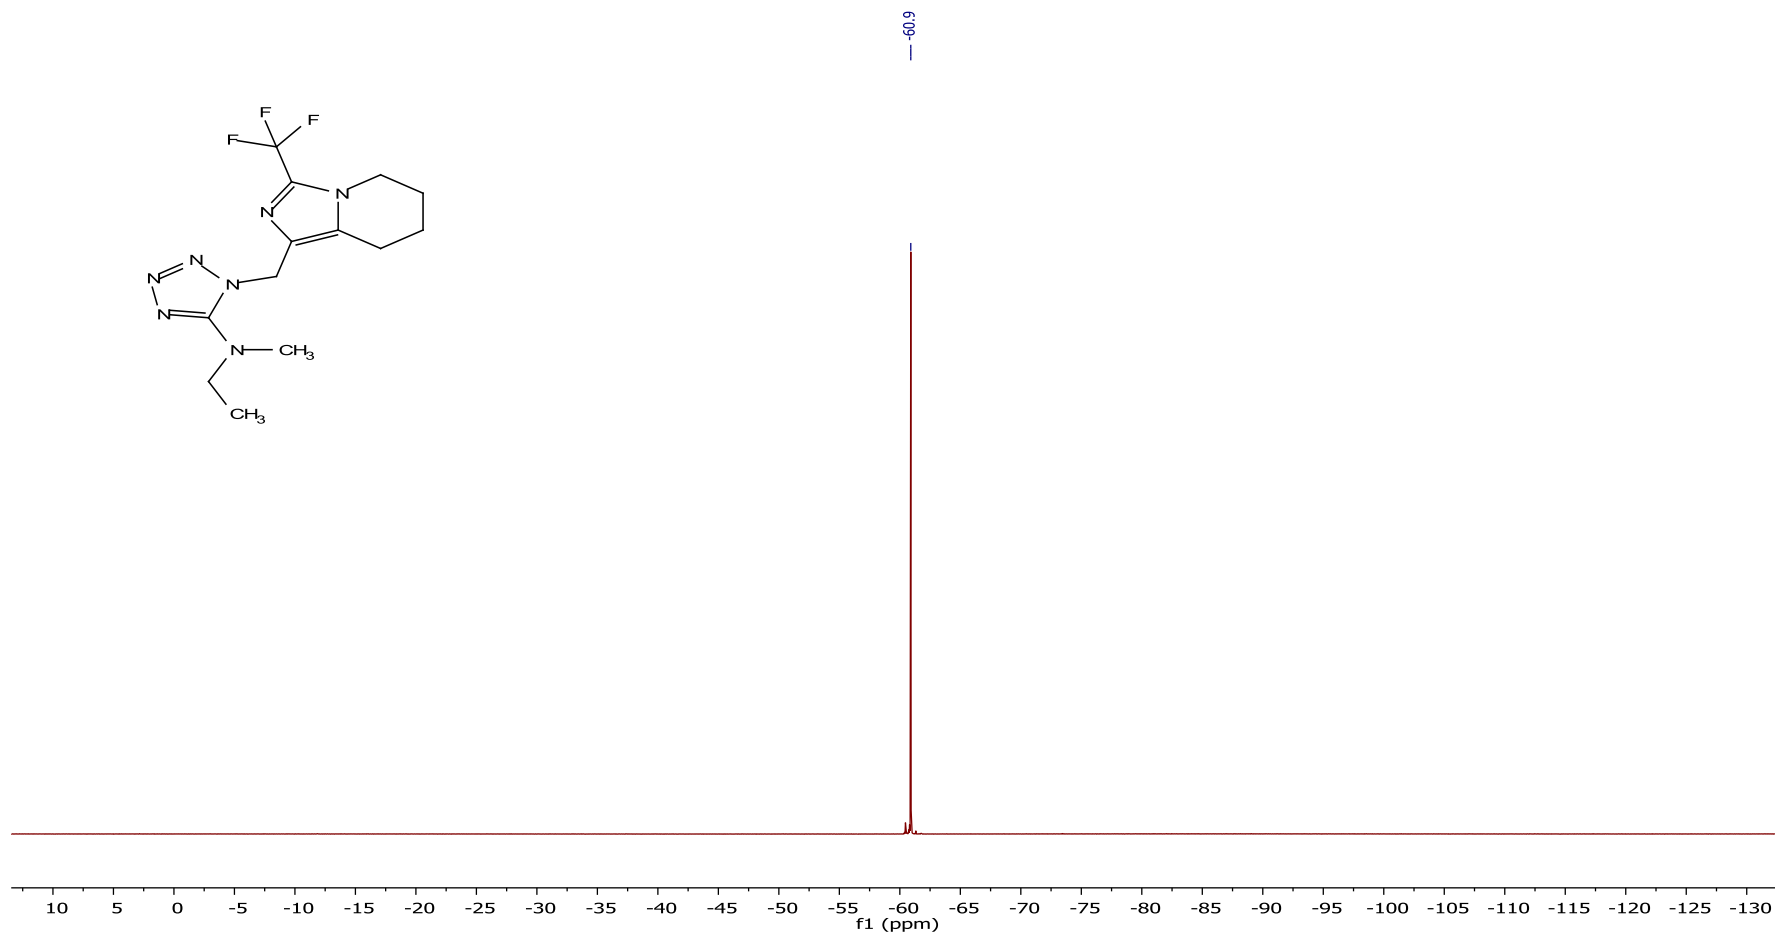

<sup>1</sup>H NMR spectrum of the compound **9**{375,511}.

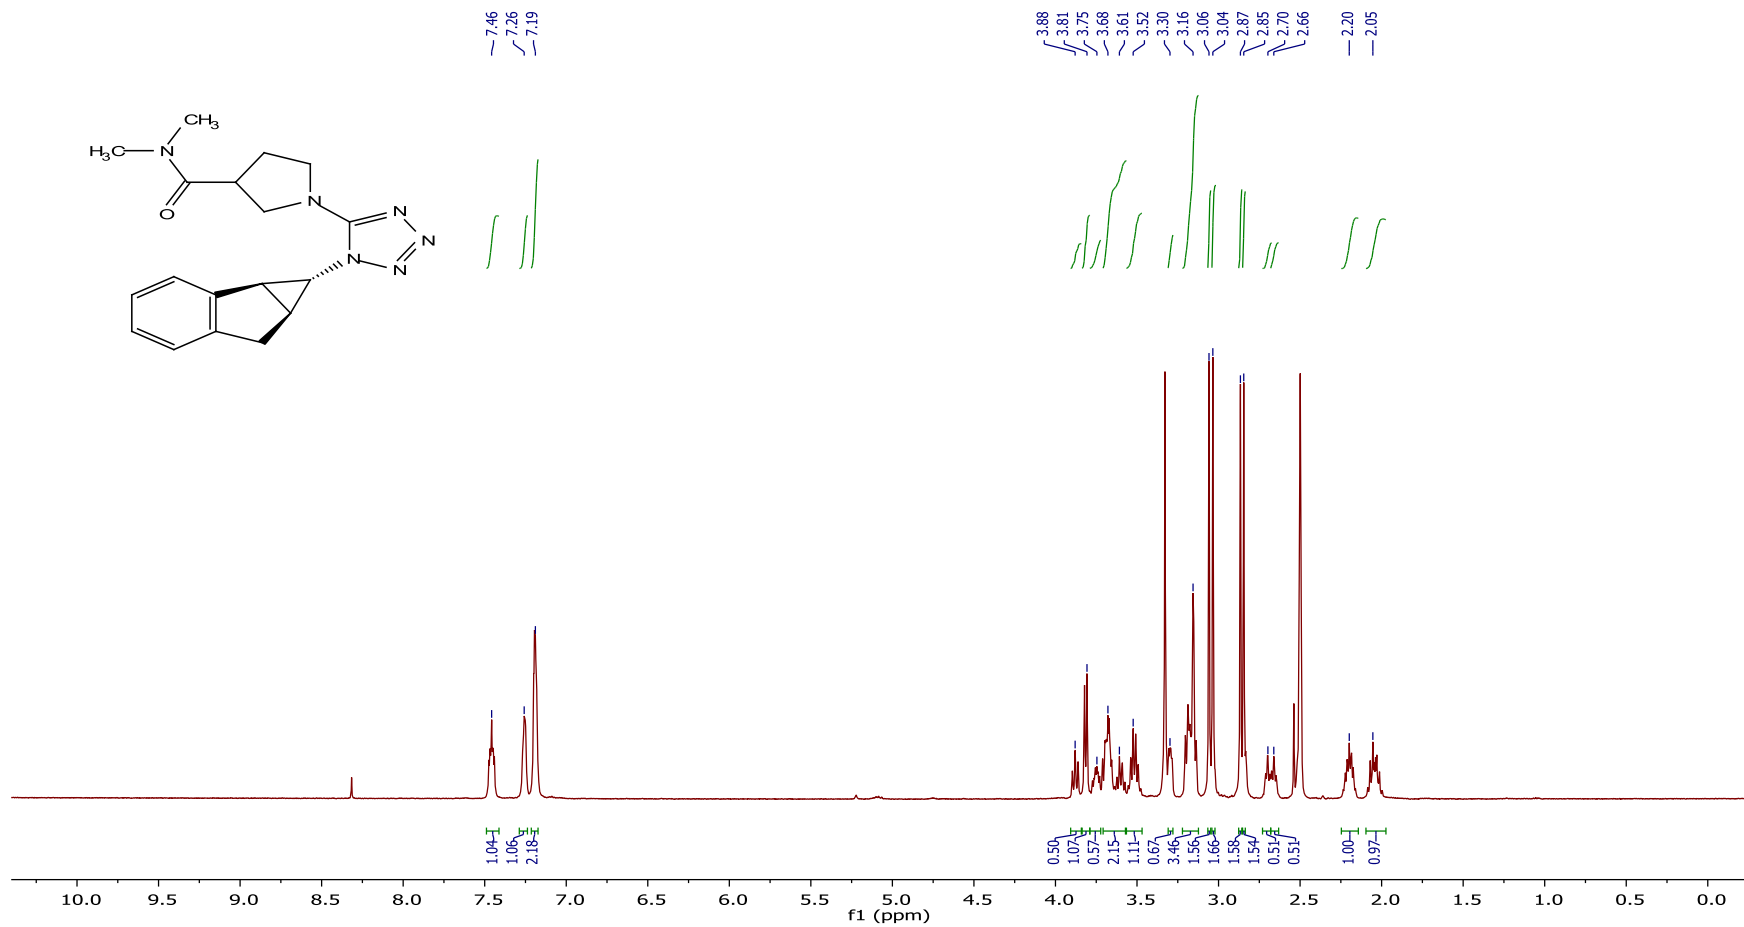

$^{13}\text{C}$  NMR spectrum of the compound **9**{375,511}.

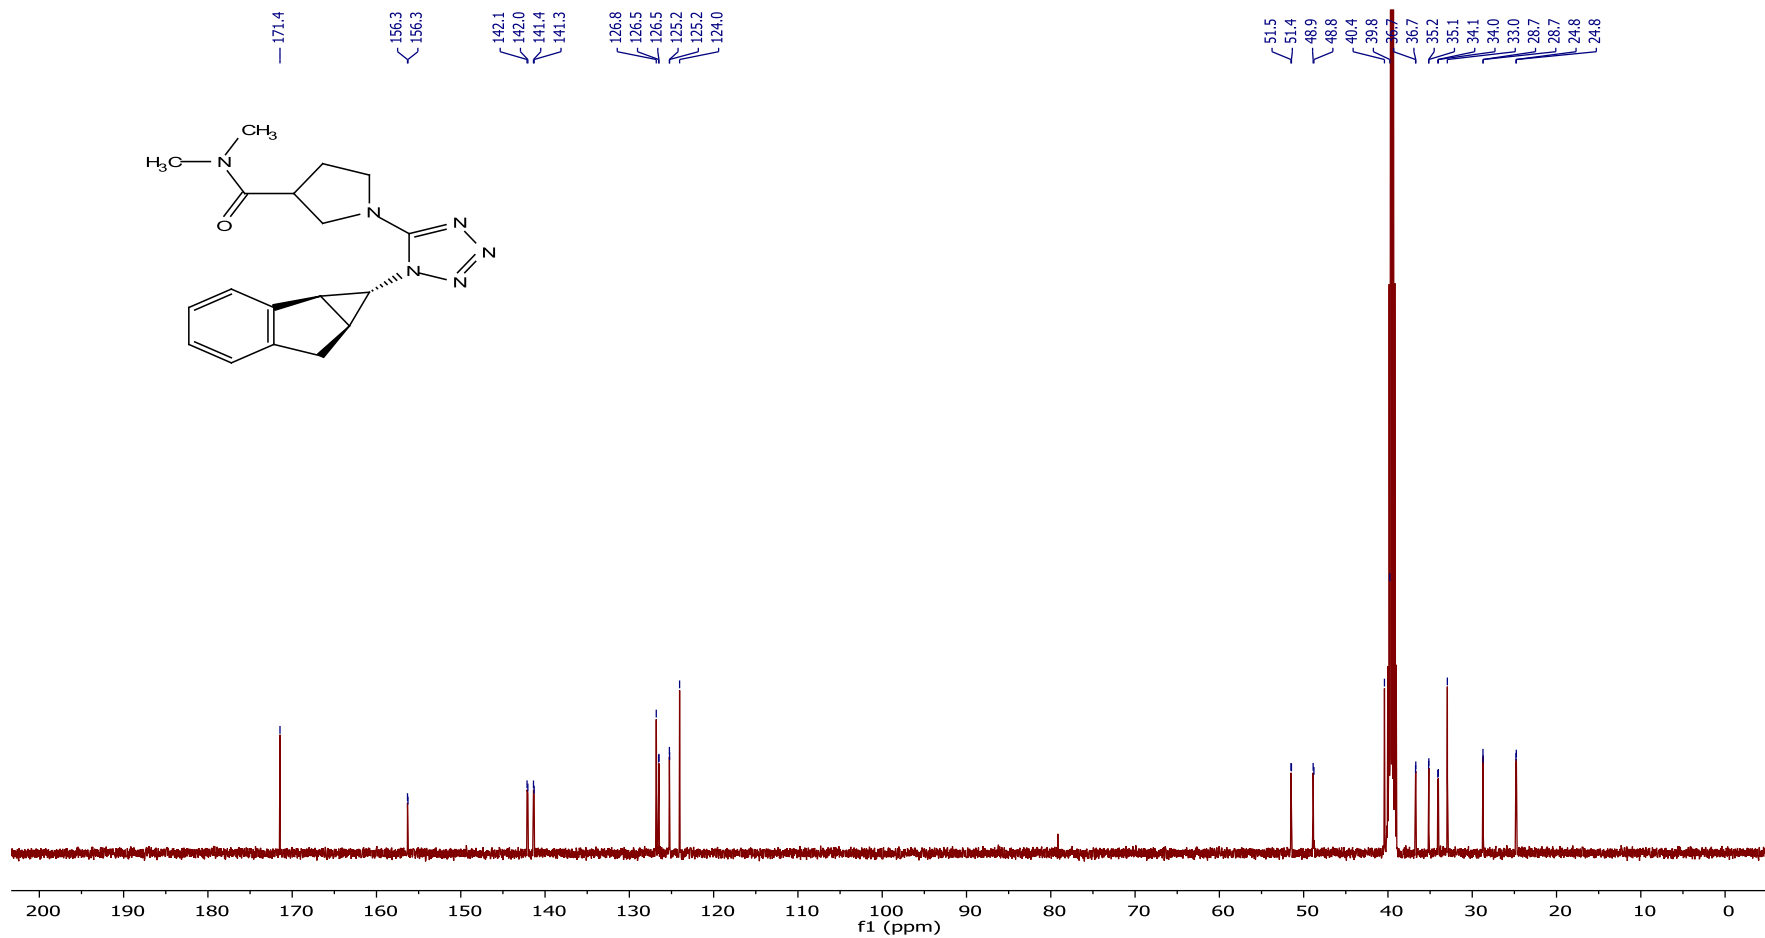

Supplement: NIHMS1597719-supplement-SI_data.pdf [file NIHMS1597719-supplement-SI_data.pdf]
